# Supplementary material for: Gaps and complex structurally variant loci in phased genome assemblies
Source: Genome Res. 2023 Apr;33(4):496–510. doi: 10.1101/gr.277334.122 (PMC10234299; doi:10.1101/gr.277334.122)
Supplement: Supplemental Material [file supp_gr.277334.122_Supplemental_Tables.xlsx]

## Sheet: Supplemental_Table_S1
Supplemental Table S1: Data QC and assembly algorithm used to generate assemblies evaluated in this study.
Study	Assembly.ID	Sample.id	Haplotype	Assembly.alg	Assembly.alg.version	PacBio.tech	total.Gbp	Read.cov	Read.mean.kbp	Read.N50.kbp		Note:
HPRC	HG002_1	HG002	1	HIFIASM	v0.14	CCS/HiFi	550.89	178	15.1	14.4		Original publication for HPRC and HGSVC assemblies
HPRC	HG002_2	HG002	2	HIFIASM	v0.14	CCS/HiFi	550.89	178	15.1	14.4		HPRC-hifiasm: Liao, Wen-Wei, Mobin Asri, Jana Ebler, Daniel Doerr, Marina Haukness, Glenn Hickey, Shuangjia Lu, et al. 2022. “A Draft Human Pangenome Reference.” bioRxiv, July.
HPRC	HG00438_1	HG00438	1	HIFIASM	v0.14	CCS/HiFi	127.47	41	22.9	22.6		HGSVC-hifiasm: Ebler, Jana, Peter Ebert, Wayne E. Clarke, Tobias Rausch, Peter A. Audano, Torsten Houwaart, Yafei Mao, et al. 2022. “Pangenome-Based Genome Inference Allows Efficient and Accurate Genotyping across a Wide Spectrum of Variant Classes.” Nature Genetics 54 (4): 518–25.
HPRC	HG00438_2	HG00438	2	HIFIASM	v0.14	CCS/HiFi	127.47	41	22.9	22.6		HGSVC-Flye: Ebert, Peter, Peter A. Audano, Qihui Zhu, Bernardo Rodriguez-Martin, David Porubsky, Marc Jan Bonder, Arvis Sulovari, et al. 2021. “Haplotype-Resolved Diverse Human Genomes and Integrated Analysis of Structural Variation.” Science, February. https://doi.org/10.1126/science.abf7117.
HPRC	HG005_1	HG005	1	HIFIASM	v0.14	CCS/HiFi	145.34	47	17	17
HPRC	HG005_2	HG005	2	HIFIASM	v0.14	CCS/HiFi	145.34	47	17	17		Details on trio-hifiasm pipeline can be found here: https://github.com/human-pangenomics/HPP_Year1_Assemblies. See the ‘Assembly Process’ section for more details.
HPRC	HG00621_1	HG00621	1	HIFIASM	v0.14	CCS/HiFi	122.5	40	22	21.5
HPRC	HG00621_2	HG00621	2	HIFIASM	v0.14	CCS/HiFi	122.5	40	22	21.5
HPRC	HG00673_1	HG00673	1	HIFIASM	v0.14	CCS/HiFi	122.49	40	20.8	21
HPRC	HG00673_2	HG00673	2	HIFIASM	v0.14	CCS/HiFi	122.49	40	20.8	21
HPRC	HG00733_1	HG00733	1	HIFIASM	v0.14	CCS/HiFi	103.8	33	13.6	13.5
HPRC	HG00733_2	HG00733	2	HIFIASM	v0.14	CCS/HiFi	103.8	33	13.6	13.5
HPRC	HG00735_1	HG00735	1	HIFIASM	v0.14	CCS/HiFi	133.5	43	22.2	22.3
HPRC	HG00735_2	HG00735	2	HIFIASM	v0.14	CCS/HiFi	133.5	43	22.2	22.3
HPRC	HG00741_1	HG00741	1	HIFIASM	v0.14	CCS/HiFi	119.23	38	24.7	24.8
HPRC	HG00741_2	HG00741	2	HIFIASM	v0.14	CCS/HiFi	119.23	38	24.7	24.8
HPRC	HG01071_1	HG01071	1	HIFIASM	v0.14	CCS/HiFi	108.93	35	26.6	26.9
HPRC	HG01071_2	HG01071	2	HIFIASM	v0.14	CCS/HiFi	108.93	35	26.6	26.9
HPRC	HG01106_1	HG01106	1	HIFIASM	v0.14	CCS/HiFi	145.12	47	22.3	22.2
HPRC	HG01106_2	HG01106	2	HIFIASM	v0.14	CCS/HiFi	145.12	47	22.3	22.2
HPRC	HG01109_1	HG01109	1	HIFIASM	v0.14	CCS/HiFi	99.78	32	21.3	21.2
HPRC	HG01109_2	HG01109	2	HIFIASM	v0.14	CCS/HiFi	99.78	32	21.3	21.2
HPRC	HG01123_1	HG01123	1	HIFIASM	v0.14	CCS/HiFi	119.42	39	16.7	16.8
HPRC	HG01123_2	HG01123	2	HIFIASM	v0.14	CCS/HiFi	119.42	39	16.7	16.8
HPRC	HG01175_1	HG01175	1	HIFIASM	v0.14	CCS/HiFi	111.94	36	21.7	21.6
HPRC	HG01175_2	HG01175	2	HIFIASM	v0.14	CCS/HiFi	111.94	36	21.7	21.6
HPRC	HG01243_1	HG01243	1	HIFIASM	v0.14	CCS/HiFi	109.24	35	19.9	19.5
HPRC	HG01243_2	HG01243	2	HIFIASM	v0.14	CCS/HiFi	109.24	35	19.9	19.5
HPRC	HG01258_1	HG01258	1	HIFIASM	v0.14	CCS/HiFi	111.15	36	19.9	20.3
HPRC	HG01258_2	HG01258	2	HIFIASM	v0.14	CCS/HiFi	111.15	36	19.9	20.3
HPRC	HG01358_1	HG01358	1	HIFIASM	v0.14	CCS/HiFi	117.01	38	18.4	18.5
HPRC	HG01358_2	HG01358	2	HIFIASM	v0.14	CCS/HiFi	117.01	38	18.4	18.5
HPRC	HG01361_1	HG01361	1	HIFIASM	v0.14	CCS/HiFi	130	42	20	20
HPRC	HG01361_2	HG01361	2	HIFIASM	v0.14	CCS/HiFi	130	42	20	20
HPRC	HG01891_1	HG01891	1	HIFIASM	v0.14	CCS/HiFi	115.13	37	17	17
HPRC	HG01891_2	HG01891	2	HIFIASM	v0.14	CCS/HiFi	115.13	37	17	17
HPRC	HG01928_1	HG01928	1	HIFIASM	v0.14	CCS/HiFi	108.9	35	23.5	23.6
HPRC	HG01928_2	HG01928	2	HIFIASM	v0.14	CCS/HiFi	108.9	35	23.5	23.6
HPRC	HG01952_1	HG01952	1	HIFIASM	v0.14	CCS/HiFi	127.85	41	21.3	21.1
HPRC	HG01952_2	HG01952	2	HIFIASM	v0.14	CCS/HiFi	127.85	41	21.3	21.1
HPRC	HG01978_1	HG01978	1	HIFIASM	v0.14	CCS/HiFi	117.57	38	26.2	26.2
HPRC	HG01978_2	HG01978	2	HIFIASM	v0.14	CCS/HiFi	117.57	38	26.2	26.2
HPRC	HG02055_1	HG02055	1	HIFIASM	v0.14	CCS/HiFi	123.16	40	19.7	19.5
HPRC	HG02055_2	HG02055	2	HIFIASM	v0.14	CCS/HiFi	123.16	40	19.7	19.5
HPRC	HG02080_1	HG02080	1	HIFIASM	v0.14	CCS/HiFi	105.9	34	21.4	21.3
HPRC	HG02080_2	HG02080	2	HIFIASM	v0.14	CCS/HiFi	105.9	34	21.4	21.3
HPRC	HG02109_1	HG02109	1	HIFIASM	v0.14	CCS/HiFi	94.96	31	19.8	19.6
HPRC	HG02109_2	HG02109	2	HIFIASM	v0.14	CCS/HiFi	94.96	31	19.8	19.6
HPRC	HG02145_1	HG02145	1	HIFIASM	v0.14	CCS/HiFi	112.8	36	18.3	18.4
HPRC	HG02145_2	HG02145	2	HIFIASM	v0.14	CCS/HiFi	112.8	36	18.3	18.4
HPRC	HG02148_1	HG02148	1	HIFIASM	v0.14	CCS/HiFi	123.24	40	17.6	16.9
HPRC	HG02148_2	HG02148	2	HIFIASM	v0.14	CCS/HiFi	123.24	40	17.6	16.9
HPRC	HG02257_1	HG02257	1	HIFIASM	v0.14	CCS/HiFi	110.64	36	19.2	19.2
HPRC	HG02257_2	HG02257	2	HIFIASM	v0.14	CCS/HiFi	110.64	36	19.2	19.2
HPRC	HG02486_1	HG02486	1	HIFIASM	v0.14	CCS/HiFi	123.9	40	18.6	18.6
HPRC	HG02486_2	HG02486	2	HIFIASM	v0.14	CCS/HiFi	123.9	40	18.6	18.6
HPRC	HG02559_1	HG02559	1	HIFIASM	v0.14	CCS/HiFi	128.54	41	20.3	20.3
HPRC	HG02559_2	HG02559	2	HIFIASM	v0.14	CCS/HiFi	128.54	41	20.3	20.3
HPRC	HG02572_1	HG02572	1	HIFIASM	v0.14	CCS/HiFi	95.89	31	19.9	20
HPRC	HG02572_2	HG02572	2	HIFIASM	v0.14	CCS/HiFi	95.89	31	19.9	20
HPRC	HG02622_1	HG02622	1	HIFIASM	v0.14	CCS/HiFi	143.99	46	23.1	22.9
HPRC	HG02622_2	HG02622	2	HIFIASM	v0.14	CCS/HiFi	143.99	46	23.1	22.9
HPRC	HG02630_1	HG02630	1	HIFIASM	v0.14	CCS/HiFi	151.01	49	19.2	19.2
HPRC	HG02630_2	HG02630	2	HIFIASM	v0.14	CCS/HiFi	151.01	49	19.2	19.2
HPRC	HG02717_1	HG02717	1	HIFIASM	v0.14	CCS/HiFi	140.3	45	17.1	16.8
HPRC	HG02717_2	HG02717	2	HIFIASM	v0.14	CCS/HiFi	140.3	45	17.1	16.8
HPRC	HG02723_1	HG02723	1	HIFIASM	v0.14	CCS/HiFi	143.29	46	16.1	15.7
HPRC	HG02723_2	HG02723	2	HIFIASM	v0.14	CCS/HiFi	143.29	46	16.1	15.7
HPRC	HG02818_1	HG02818	1	HIFIASM	v0.14	CCS/HiFi	114.11	37	16.5	16.8
HPRC	HG02818_2	HG02818	2	HIFIASM	v0.14	CCS/HiFi	114.11	37	16.5	16.8
HPRC	HG02886_1	HG02886	1	HIFIASM	v0.14	CCS/HiFi	137.41	44	17.9	17.6
HPRC	HG02886_2	HG02886	2	HIFIASM	v0.14	CCS/HiFi	137.41	44	17.9	17.6
HPRC	HG03098_1	HG03098	1	HIFIASM	v0.14	CCS/HiFi	111.08	36	19.9	19.5
HPRC	HG03098_2	HG03098	2	HIFIASM	v0.14	CCS/HiFi	111.08	36	19.9	19.5
HPRC	HG03453_1	HG03453	1	HIFIASM	v0.14	CCS/HiFi	160.25	52	20.1	19.9
HPRC	HG03453_2	HG03453	2	HIFIASM	v0.14	CCS/HiFi	160.25	52	20.1	19.9
HPRC	HG03486_1	HG03486	1	HIFIASM	v0.14	CCS/HiFi	122.26	39	19.1	18.7
HPRC	HG03486_2	HG03486	2	HIFIASM	v0.14	CCS/HiFi	122.26	39	19.1	18.7
HPRC	HG03492_1	HG03492	1	HIFIASM	v0.14	CCS/HiFi	104.36	34	20.6	21
HPRC	HG03492_2	HG03492	2	HIFIASM	v0.14	CCS/HiFi	104.36	34	20.6	21
HPRC	HG03516_1	HG03516	1	HIFIASM	v0.14	CCS/HiFi	110.25	36	18.7	18.7
HPRC	HG03516_2	HG03516	2	HIFIASM	v0.14	CCS/HiFi	110.25	36	18.7	18.7
HPRC	HG03540_1	HG03540	1	HIFIASM	v0.14	CCS/HiFi	153.41	49	20.8	20.5
HPRC	HG03540_2	HG03540	2	HIFIASM	v0.14	CCS/HiFi	153.41	49	20.8	20.5
HPRC	HG03579_1	HG03579	1	HIFIASM	v0.14	CCS/HiFi	149.99	48	19.5	19.4
HPRC	HG03579_2	HG03579	2	HIFIASM	v0.14	CCS/HiFi	149.99	48	19.5	19.4
HPRC	NA18906_1	NA18906	1	HIFIASM	v0.14	CCS/HiFi	130.85	42	21.7	21.2
HPRC	NA18906_2	NA18906	2	HIFIASM	v0.14	CCS/HiFi	130.85	42	21.7	21.2
HPRC	NA19240_1	NA19240	1	HIFIASM	v0.14	CCS/HiFi	125.18	40	18.1	17.7
HPRC	NA19240_2	NA19240	2	HIFIASM	v0.14	CCS/HiFi	125.18	40	18.1	17.7
HPRC	NA20129_1	NA20129	1	HIFIASM	v0.14	CCS/HiFi	116.26	38	17.8	17.7
HPRC	NA20129_2	NA20129	2	HIFIASM	v0.14	CCS/HiFi	116.26	38	17.8	17.7
HPRC	NA21309_1	NA21309	1	HIFIASM	v0.14	CCS/HiFi	122.41	39	16.9	16.6
HPRC	NA21309_2	NA21309	2	HIFIASM	v0.14	CCS/HiFi	122.41	39	16.9	16.6
HGSVC	HG00096_1	HG00096	1	FLYE	v2.7	CLR	233	75.2	27.6	44.8
HGSVC	HG00096_2	HG00096	2	FLYE	v2.7	CLR	233	75.2	27.6	44.8
HGSVC	HG00171_1	HG00171	1	FLYE	v2.7	CLR	310	100	21	33.2
HGSVC	HG00171_2	HG00171	2	FLYE	v2.7	CLR	310	100	21	33.2
HGSVC	HG00512_1	HG00512	1	HIFIASM	v0.15.2	CCS/HiFi	93	30	15.4	15.6
HGSVC	HG00512_2	HG00512	2	HIFIASM	v0.15.2	CCS/HiFi	93	30	15.4	15.6
HGSVC	HG00512_1	HG00512	1	FLYE	v2.7	CLR	93	30	15.4	15.6
HGSVC	HG00512_2	HG00512	2	FLYE	v2.7	CLR	93	30	15.4	15.6
HGSVC	HG00513_1	HG00513	1	HIFIASM	v0.15.2	CCS/HiFi	93	30	15.4	15.6
HGSVC	HG00513_2	HG00513	2	HIFIASM	v0.15.2	CCS/HiFi	93	30	15.4	15.6
HGSVC	HG00513_1	HG00513	1	FLYE	v2.7	CLR	93	30	15.4	15.6
HGSVC	HG00513_2	HG00513	2	FLYE	v2.7	CLR	93	30	15.4	15.6
HGSVC	HG00514_1	HG00514	1	HIFIASM	v0.15.2	CCS/HiFi	76	24.5	17	17.1
HGSVC	HG00514_2	HG00514	2	HIFIASM	v0.15.2	CCS/HiFi	76	24.5	17	17.1
HGSVC	HG00514_1	HG00514	1	FLYE	v2.7	CLR	76	24.5	17	17.1
HGSVC	HG00514_2	HG00514	2	FLYE	v2.7	CLR	76	24.5	17	17.1
HGSVC	HG00731_1	HG00731	1	HIFIASM	v0.15.2	CCS/HiFi	103	33.2	11.1	10.6
HGSVC	HG00731_2	HG00731	2	HIFIASM	v0.15.2	CCS/HiFi	103	33.2	11.1	10.6
HGSVC	HG00731_1	HG00731	1	FLYE	v2.7	CLR	103	33.2	11.1	10.6
HGSVC	HG00731_2	HG00731	2	FLYE	v2.7	CLR	103	33.2	11.1	10.6
HGSVC	HG00732_1	HG00732	1	HIFIASM	v0.15.2	CCS/HiFi	76	24.5	22.9	22.9
HGSVC	HG00732_2	HG00732	2	HIFIASM	v0.15.2	CCS/HiFi	76	24.5	22.9	22.9
HGSVC	HG00732_1	HG00732	1	FLYE	v2.7	CLR	76	24.5	22.9	22.9
HGSVC	HG00732_2	HG00732	2	FLYE	v2.7	CLR	76	24.5	22.9	22.9
HGSVC	HG00733_1	HG00733	1	HIFIASM	v0.15.2	CCS/HiFi	104	33.5	13.6	13.5
HGSVC	HG00733_2	HG00733	2	HIFIASM	v0.15.2	CCS/HiFi	104	33.5	13.6	13.5
HGSVC	HG00733_1	HG00733	1	FLYE	v2.7	CLR	104	33.5	13.6	13.5
HGSVC	HG00733_2	HG00733	2	FLYE	v2.7	CLR	104	33.5	13.6	13.5
HGSVC	HG00864_1	HG00864	1	FLYE	v2.7	CLR	230	74.2	26.5	42.2
HGSVC	HG00864_2	HG00864	2	FLYE	v2.7	CLR	230	74.2	26.5	42.2
HGSVC	HG01114_1	HG01114	1	FLYE	v2.7	CLR	243	78.4	15.6	24.9
HGSVC	HG01114_2	HG01114	2	FLYE	v2.7	CLR	243	78.4	15.6	24.9
HGSVC	HG01505_1	HG01505	1	FLYE	v2.7	CLR	222	71.6	21.9	40.2
HGSVC	HG01505_2	HG01505	2	FLYE	v2.7	CLR	222	71.6	21.9	40.2
HGSVC	HG01596_1	HG01596	1	FLYE	v2.7	CLR	281	90.6	17.8	28.4
HGSVC	HG01596_2	HG01596	2	FLYE	v2.7	CLR	281	90.6	17.8	28.4
HGSVC	HG02011_1	HG02011	1	FLYE	v2.7	CLR	321	103.5	28.9	45.4
HGSVC	HG02011_2	HG02011	2	FLYE	v2.7	CLR	321	103.5	28.9	45.4
HGSVC	HG02492_1	HG02492	1	FLYE	v2.7	CLR	320	103.2	30	46.9
HGSVC	HG02492_2	HG02492	2	FLYE	v2.7	CLR	320	103.2	30	46.9
HGSVC	HG02587_1	HG02587	1	FLYE	v2.7	CLR	257	82.9	16.6	31.1
HGSVC	HG02587_2	HG02587	2	FLYE	v2.7	CLR	257	82.9	16.6	31.1
HGSVC	HG02818_1	HG02818	1	HIFIASM	v0.15.2	CCS/HiFi	114	36.8	16.5	16.8
HGSVC	HG02818_2	HG02818	2	HIFIASM	v0.15.2	CCS/HiFi	114	36.8	16.5	16.8
HGSVC	HG03009_1	HG03009	1	FLYE	v2.7	CLR	339	109.4	24.2	40.2
HGSVC	HG03009_2	HG03009	2	FLYE	v2.7	CLR	339	109.4	24.2	40.2
HGSVC	HG03065_1	HG03065	1	FLYE	v2.7	CLR	339	109.4	27.1	43
HGSVC	HG03065_2	HG03065	2	FLYE	v2.7	CLR	339	109.4	27.1	43
HGSVC	HG03125_1	HG03125	1	HIFIASM	v0.15.2	CCS/HiFi	85	27.4	17.8	17.4
HGSVC	HG03125_2	HG03125	2	HIFIASM	v0.15.2	CCS/HiFi	85	27.4	17.8	17.4
HGSVC	HG03371_1	HG03371	1	FLYE	v2.7	CLR	315	101.6	28	44.9
HGSVC	HG03371_2	HG03371	2	FLYE	v2.7	CLR	315	101.6	28	44.9
HGSVC	HG03486_1	HG03486	1	HIFIASM	v0.15.2	CCS/HiFi	122	39.4	19.1	18.7
HGSVC	HG03486_2	HG03486	2	HIFIASM	v0.15.2	CCS/HiFi	122	39.4	19.1	18.7
HGSVC	HG03683_1	HG03683	1	FLYE	v2.7	CLR	363	117.1	25.9	40.4
HGSVC	HG03683_2	HG03683	2	FLYE	v2.7	CLR	363	117.1	25.9	40.4
HGSVC	HG03732_1	HG03732	1	FLYE	v2.7	CLR	200	64.5	25.6	41.4
HGSVC	HG03732_2	HG03732	2	FLYE	v2.7	CLR	200	64.5	25.6	41.4
HGSVC	NA12329_1	NA12329	1	FLYE	v2.7	CLR	372	120	25.6	40.9
HGSVC	NA12329_2	NA12329	2	FLYE	v2.7	CLR	372	120	25.6	40.9
HGSVC	NA12878_1	NA12878	1	HIFIASM	v0.15.2	CCS/HiFi	90	29	10	10
HGSVC	NA12878_2	NA12878	2	HIFIASM	v0.15.2	CCS/HiFi	90	29	10	10
HGSVC	NA18534_1	NA18534	1	FLYE	v2.7	CLR	202	65.2	23.3	39.7
HGSVC	NA18534_2	NA18534	2	FLYE	v2.7	CLR	202	65.2	23.3	39.7
HGSVC	NA18939_1	NA18939	1	FLYE	v2.7	CLR	275	88.7	26.8	42.8
HGSVC	NA18939_2	NA18939	2	FLYE	v2.7	CLR	275	88.7	26.8	42.8
HGSVC	NA19238_1	NA19238	1	HIFIASM	v0.15.2	CCS/HiFi	78	25.2	12.4	12.2
HGSVC	NA19238_2	NA19238	2	HIFIASM	v0.15.2	CCS/HiFi	78	25.2	12.4	12.2
HGSVC	NA19238_1	NA19238	1	FLYE	v2.7	CLR	78	25.2	12.4	12.2
HGSVC	NA19238_2	NA19238	2	FLYE	v2.7	CLR	78	25.2	12.4	12.2
HGSVC	NA19239_1	NA19239	1	HIFIASM	v0.15.2	CCS/HiFi	81	26.1	14	14.1
HGSVC	NA19239_2	NA19239	2	HIFIASM	v0.15.2	CCS/HiFi	81	26.1	14	14.1
HGSVC	NA19239_1	NA19239	1	FLYE	v2.7	CLR	81	26.1	14	14.1
HGSVC	NA19239_2	NA19239	2	FLYE	v2.7	CLR	81	26.1	14	14.1
HGSVC	NA19240_1	NA19240	1	HIFIASM	v0.15.2	CCS/HiFi	89	28.7	12.9	12.9
HGSVC	NA19240_2	NA19240	2	HIFIASM	v0.15.2	CCS/HiFi	89	28.7	12.9	12.9
HGSVC	NA19240_1	NA19240	1	FLYE	v2.7	CLR	89	28.7	12.9	12.9
HGSVC	NA19240_2	NA19240	2	FLYE	v2.7	CLR	89	28.7	12.9	12.9
HGSVC	NA19650_1	NA19650	1	FLYE	v2.7	CLR	149	48.1	24.7	39.6
HGSVC	NA19650_2	NA19650	2	FLYE	v2.7	CLR	149	48.1	24.7	39.6
HGSVC	NA19983_1	NA19983	1	FLYE	v2.7	CLR	403	130	28.4	43.9
HGSVC	NA19983_2	NA19983	2	FLYE	v2.7	CLR	403	130	28.4	43.9
HGSVC	NA20509_1	NA20509	1	FLYE	v2.7	CLR	159	51.3	23.4	43.3
HGSVC	NA20509_2	NA20509	2	FLYE	v2.7	CLR	159	51.3	23.4	43.3
HGSVC	NA20847_1	NA20847	1	FLYE	v2.7	CLR	175	56.5	29.1	47.4
HGSVC	NA20847_2	NA20847	2	FLYE	v2.7	CLR	175	56.5	29.1	47.4
HGSVC	NA24385_1	NA24385	1	HIFIASM	v0.15.2	CCS/HiFi	111	35.8	15	14.7
HGSVC	NA24385_2	NA24385	2	HIFIASM	v0.15.2	CCS/HiFi	111	35.8	15	14.7

## Sheet: Supplemental_Table_S2
Supplemental Table S2: Regions of wrongly resolved homozygous inversions.
seqnames	start	end	width	Ws	Cs	states	asm.id	pip.id		Legend:
cluster6_h2tg000011l	6346601	6447561	100961	223	0	ww	HG01123_h2_bwa	PGAS		seqnames	Assembly contig name
cluster27_h1tg000002l	1	657043	657043	83	4	ww	HG01258_h1_bwa	PGAS		start	Region start position
cluster14_h2tg000005l	1	2009778	2009778	3315	42	ww	HG01258_h2_bwa	PGAS		end	Region end position
cluster13_h1tg000002l	1	126483	126483	51	15	ww	HG01358_h1_bwa	PGAS		width	Region size
cluster16_h2tg000004l	1	784703	784703	86	2	ww	HG01358_h2_bwa	PGAS		Ws	Number of Watson (minus) reads mapped to a given region
cluster10_h2tg000005l	601296	639008	37713	51	16	ww	HG01891_h2_bwa	PGAS		Cs	Number of Crick (plus) reads mapped to a given region
cluster8_h2tg000016l	2279628	2535322	255695	81	1	ww	HG01891_h2_bwa	PGAS		states	Defined strand-state based on binomial distribution of plus and minus reads (ww – Watson-Watson)
cluster17_h1tg000003l	1	1021607	1021607	64	0	ww	HG02257_h1_bwa	PGAS		asm.id	Assembly ID – sample_haplotype
cluster1_h1tg000004l	26206959	26265851	58893	91	24	ww	HG02486_h1_bwa	PGAS		pip.id	Assembly pipeline ID – PGAS(trio-free) and TRIO-hifiasm
cluster1_h1tg000004l	26535244	26592803	57560	77	22	ww	HG02486_h1_bwa	PGAS
cluster1_h1tg000004l	26970925	27009186	38262	54	16	ww	HG02486_h1_bwa	PGAS
cluster17_h1tg000001l	32502289	32968408	466120	666	20	ww	HG02486_h1_bwa	PGAS
cluster12_h1tg000006l	11053220	12000648	947429	364	2	ww	HG02559_h1_bwa	PGAS
cluster24_h1tg000005l	1468954	1613891	144938	89	0	ww	HG02559_h1_bwa	PGAS
cluster16_h2tg000002l	1	609254	609254	126	3	ww	HG02559_h2_bwa	PGAS
HG01123#2#JAGYYY010000006.1	56347695	56419747	72053	129	0	ww	HG01123_mat_bwa	TRIO
HG01123#2#JAGYYY010000073.1	6353564	6454524	100961	223	0	ww	HG01123_mat_bwa	TRIO
HG01123#2#JAGYYY010000105.1	4091942	4193571	101630	62	1	ww	HG01123_mat_bwa	TRIO
HG01123#1#JAGYYZ010000009.1	3555186	3630382	75197	164	0	ww	HG01123_pat_bwa	TRIO
HG01258#2#JAGYYU010000018.1	45324649	45328646	3998	48	2	ww	HG01258_mat_bwa	TRIO
HG01258#1#JAGYYV010000029.1	56808888	57007383	198496	300	5	ww	HG01258_pat_bwa	TRIO
HG01258#1#JAGYYV010000057.1	3504668	3735848	231181	169	3	ww	HG01258_pat_bwa	TRIO
HG01258#1#JAGYYV010000072.1	3251095	4394900	1143806	957	1	ww	HG01258_pat_bwa	TRIO
HG01358#2#JAGYZA010000007.1	72390873	72451665	60793	228	73	ww	HG01358_mat_bwa	TRIO
HG01361#2#JAGYYW010000013.1	81660840	81680236	19397	106	0	ww	HG01361_mat_bwa	TRIO
HG01361#2#JAGYYW010000085.1	20055378	20069375	13998	55	20	ww	HG01361_mat_bwa	TRIO
HG01361#1#JAGYYX010000134.1	1	43597	43597	69	1	ww	HG01361_pat_bwa	TRIO
HG01891#2#JAGYVN010000025.1	6483340	8281240	1797901	2464	25	ww	HG01891_mat_bwa	TRIO
HG01891#2#JAGYVN010000028.1	601296	639008	37713	50	15	ww	HG01891_mat_bwa	TRIO
HG02257#2#JAGYVH010000071.1	14673079	15638103	965025	192	14	ww	HG02257_mat_bwa	TRIO
HG02257#2#JAGYVH010000105.1	2590986	2690342	99357	120	0	ww	HG02257_mat_bwa	TRIO
HG02257#1#JAGYVI010000110.1	2410774	2525084	114311	85	1	ww	HG02257_pat_bwa	TRIO
HG02486#2#JAGYVL010000011.1	82952784	83425224	472441	92	19	ww	HG02486_mat_bwa	TRIO
HG02486#2#JAGYVL010000011.1	83487625	84001024	513400	53	11	ww	HG02486_mat_bwa	TRIO
HG02486#2#JAGYVL010000012.1	32502275	32968394	466120	669	20	ww	HG02486_mat_bwa	TRIO
HG02486#2#JAGYVL010000031.1	11467219	11636551	169333	187	3	ww	HG02486_mat_bwa	TRIO
HG02486#2#JAGYVL010000039.1	574396	673639	99244	233	11	ww	HG02486_mat_bwa	TRIO
HG02486#1#JAGYVM010000057.1	1468562	1478716	10155	56	12	ww	HG02486_pat_bwa	TRIO

## Sheet: Supplemental_Table_S3
Supplemental Table S3: List of all defined simple contig ends.
#query_name	query_start	query_end	query_length	strand	hap	tig	reference_start	reference_end	reference_length	perID_by_matches	perID_by_events	perID_by_all	matches	mismatches	deletion_events	insertion_events	deletions	insertions	Cohort	Sex	FamilyID	Subpopulation	Superpopulation	Notes	sample	ID	NID	Max_GA_Frac	Max_TC_Frac	Max_GC_Frac	Max_AT_Frac	acro_p	n_contig_ends_in_region	sequence_context	simple_seq_content
chr1	862192	862193	248387328	-	1	JAHKSE010000012.1	120021261	120021262	120021262	0	0	0	0	1	0	0	0	0	HPRC_PLUS	male	3140		EUR	PGP - Ashkenazim Jewish	HG002	HG002 1 JAHKSE010000012.1	1	0.842	0.851	0.784	0.551	FALSE	138	High GA/TC (80%)	High GA/TC (80%)
chr1	2653541	2653542	248387328	-	1	JAHKSE010000319.1	26817	26818	26818	0	0	0	0	1	0	0	0	0	HPRC_PLUS	male	3140		EUR	PGP - Ashkenazim Jewish	HG002	HG002 1 JAHKSE010000319.1	2	0.565	0.594	0.625	0.617	FALSE	4	other	other
chr1	2680908	2680909	248387328	-	1	JAHKSE010000319.1	0	1	26818	0	0	0	0	1	0	0	0	0	HPRC_PLUS	male	3140		EUR	PGP - Ashkenazim Jewish	HG002	HG002 1 JAHKSE010000319.1	3	0.573	0.762	0.73	0.553	FALSE	4	other	other
chr1	103287302	103287303	248387328	+	1	JAHKSE010000438.1	0	1	175878	0	0	0	0	1	0	0	0	0	HPRC_PLUS	male	3140		EUR	PGP - Ashkenazim Jewish	HG002	HG002 1 JAHKSE010000438.1	4	0.642	0.572	0.444	0.742	FALSE	42	other	other
chr1	103463182	103463183	248387328	+	1	JAHKSE010000438.1	175877	175878	175878	0	0	0	0	1	0	0	0	0	HPRC_PLUS	male	3140		EUR	PGP - Ashkenazim Jewish	HG002	HG002 1 JAHKSE010000438.1	5	0.64	0.556	0.445	0.745	FALSE	23	SD	SD and High GA/TC (80%)
chr1	103464621	103464622	248387328	-	1	JAHKSE010000484.1	34336	34337	34337	0	0	0	0	1	0	0	0	0	HPRC_PLUS	male	3140		EUR	PGP - Ashkenazim Jewish	HG002	HG002 1 JAHKSE010000484.1	6	0.64	0.558	0.445	0.745	FALSE	23	SD	SD and High GA/TC (80%)
chr1	103498958	103498959	248387328	-	1	JAHKSE010000484.1	0	1	34337	0	0	0	0	1	0	0	0	0	HPRC_PLUS	male	3140		EUR	PGP - Ashkenazim Jewish	HG002	HG002 1 JAHKSE010000484.1	7	0.631	0.595	0.523	0.727	FALSE	27	SD	SD and High GA/TC (80%)
chr1	120635727	120635728	248387328	+	1	JAHKSE010000028.1	0	1	19199669	0	0	0	0	1	0	0	0	0	HPRC_PLUS	male	3140		EUR	PGP - Ashkenazim Jewish	HG002	HG002 1 JAHKSE010000028.1	8	0.596	0.632	0.561	0.678	FALSE	3	SD	SD and High GA/TC (80%)
chr1	120658265	120658266	248387328	-	1	JAHKSE010000012.1	0	1	120021262	0	0	0	0	1	0	0	0	0	HPRC_PLUS	male	3140		EUR	PGP - Ashkenazim Jewish	HG002	HG002 1 JAHKSE010000012.1	9	0.629	0.59	0.502	0.678	FALSE	3	SD	SD and High GA/TC (80%)
chr1	128171817	128171818	248387328	+	1	JAHKSE010000001.1	109466335	109466336	109479248	0	0	0	0	1	0	0	0	0	HPRC_PLUS	male	3140		EUR	PGP - Ashkenazim Jewish	HG002	HG002 1 JAHKSE010000001.1	10	0.543	0.56	0.683	0.565	FALSE	8	Satellite	Satellite
chr1	137341945	137341946	248387328	+	1	JAHKSE010000516.1	4564	4565	71193	0	0	0	0	1	0	0	0	0	HPRC_PLUS	male	3140		EUR	PGP - Ashkenazim Jewish	HG002	HG002 1 JAHKSE010000516.1	11	0.625	0.393	0.379	0.644	FALSE	22	Satellite	Satellite
chr1	137402487	137402488	248387328	+	1	JAHKSE010000516.1	71192	71193	71193	0	0	0	0	1	0	0	0	0	HPRC_PLUS	male	3140		EUR	PGP - Ashkenazim Jewish	HG002	HG002 1 JAHKSE010000516.1	12	0.628	0.392	0.379	0.646	FALSE	22	Satellite	Satellite
chr1	139764594	139764595	248387328	-	1	JAHKSE010000028.1	18660165	18660166	19199669	0	0	0	0	1	0	0	0	0	HPRC_PLUS	male	3140		EUR	PGP - Ashkenazim Jewish	HG002	HG002 1 JAHKSE010000028.1	13	0.633	0.393	0.379	0.645	FALSE	4	Satellite	Satellite
chr1	140962672	140962673	248387328	-	1	JAHKSE010000122.1	40980	40981	2538109	0	0	0	0	1	0	0	0	0	HPRC_PLUS	male	3140		EUR	PGP - Ashkenazim Jewish	HG002	HG002 1 JAHKSE010000122.1	14	0.634	0.398	0.38	0.645	FALSE	6	Satellite	Satellite
chr1	143675020	143675021	248387328	-	1	JAHKSE010000451.1	54299	54300	54300	0	0	0	0	1	0	0	0	0	HPRC_PLUS	male	3140		EUR	PGP - Ashkenazim Jewish	HG002	HG002 1 JAHKSE010000451.1	15	0.642	0.6	0.441	0.739	FALSE	11	SD	SD and High GA/TC (80%)
chr1	143729304	143729305	248387328	-	1	JAHKSE010000451.1	0	1	54300	0	0	0	0	1	0	0	0	0	HPRC_PLUS	male	3140		EUR	PGP - Ashkenazim Jewish	HG002	HG002 1 JAHKSE010000451.1	16	0.614	0.774	0.423	0.747	FALSE	13	SD	SD and High GA/TC (80%)
chr1	242405138	242405139	248387328	-	1	JAHKSE010000280.1	0	1	1803729	0	0	0	0	1	0	0	0	0	HPRC_PLUS	male	3140		EUR	PGP - Ashkenazim Jewish	HG002	HG002 1 JAHKSE010000280.1	17	0.584	0.563	0.522	0.622	FALSE	18	SD	SD and High GA/TC (80%)
chr1	248387327	248387328	248387328	-	1	JAHKSE010000001.1	4536	4537	109479248	0	0	0	0	1	0	0	0	0	HPRC_PLUS	male	3140		EUR	PGP - Ashkenazim Jewish	HG002	HG002 1 JAHKSE010000001.1	18	0.722	0.565	0.7	0.667	FALSE	94	Chromosome end	Chromosome end or Poisson
chr10	0	1	134758134	+	1	JAHKSE010000067.1	3166	3167	40872144	0	0	0	0	1	0	0	0	0	HPRC_PLUS	male	3140		EUR	PGP - Ashkenazim Jewish	HG002	HG002 1 JAHKSE010000067.1	19	0.656	0.672	0.897	0.703	FALSE	94	Chromosome end	Chromosome end or Poisson
chr10	23573265	23573266	134758134	+	1	JAHKSE010000523.1	7132	7133	41560	0	0	0	0	1	0	0	0	0	HPRC_PLUS	male	3140		EUR	PGP - Ashkenazim Jewish	HG002	HG002 1 JAHKSE010000523.1	20	0.574	0.63	0.513	0.714	FALSE	4	other	other
chr10	23573265	23573266	134758134	+	1	JAHKSE010000104.1	5540	5541	31461	0	0	0	0	1	0	0	0	0	HPRC_PLUS	male	3140		EUR	PGP - Ashkenazim Jewish	HG002	HG002 1 JAHKSE010000104.1	21	0.574	0.63	0.513	0.714	FALSE	4	other	other
chr10	23599190	23599191	134758134	+	1	JAHKSE010000104.1	31460	31461	31461	0	0	0	0	1	0	0	0	0	HPRC_PLUS	male	3140		EUR	PGP - Ashkenazim Jewish	HG002	HG002 1 JAHKSE010000104.1	22	0.638	0.597	0.491	0.699	FALSE	4	other	other
chr10	23607689	23607690	134758134	+	1	JAHKSE010000523.1	41548	41549	41560	0	0	0	0	1	0	0	0	0	HPRC_PLUS	male	3140		EUR	PGP - Ashkenazim Jewish	HG002	HG002 1 JAHKSE010000523.1	23	0.637	0.626	0.549	0.673	FALSE	4	other	other
chr10	41039412	41039413	134758134	+	1	JAHKSE010000149.1	210384	210385	8308882	0	0	0	0	1	0	0	0	0	HPRC_PLUS	male	3140		EUR	PGP - Ashkenazim Jewish	HG002	HG002 1 JAHKSE010000149.1	24	0.494	0.527	0.388	0.626	FALSE	48	Alpha	Satellite
chr10	41071677	41071678	134758134	+	1	JAHKSE010000067.1	40833370	40833371	40872144	100	100	100	1	0	0	0	0	0	HPRC_PLUS	male	3140		EUR	PGP - Ashkenazim Jewish	HG002	HG002 1 JAHKSE010000067.1	25	0.493	0.526	0.389	0.633	FALSE	50	Alpha	Satellite
chr10	42882884	42882885	134758134	-	1	JAHKSE010000034.1	0	1	5919014	0	0	0	0	1	0	0	0	0	HPRC_PLUS	male	3140		EUR	PGP - Ashkenazim Jewish	HG002	HG002 1 JAHKSE010000034.1	26	0.626	0.393	0.381	0.649	FALSE	11	Satellite	Satellite
chr10	43062502	43062503	134758134	+	1	JAHKSE010000195.1	2559085	2559086	2562192	0	0	0	0	1	0	0	0	0	HPRC_PLUS	male	3140		EUR	PGP - Ashkenazim Jewish	HG002	HG002 1 JAHKSE010000195.1	27	0.567	0.721	0.711	0.655	FALSE	6	SD	SD and High GA/TC (80%)
chr10	48268671	48268672	134758134	-	1	JAHKSE010000025.1	86344610	86344611	86344611	0	0	0	0	1	0	0	0	0	HPRC_PLUS	male	3140		EUR	PGP - Ashkenazim Jewish	HG002	HG002 1 JAHKSE010000025.1	28	0.601	0.594	0.677	0.681	FALSE	4	other	other
chr10	48295261	48295262	134758134	+	1	JAHKSE010000149.1	8308881	8308882	8308882	0	0	0	0	1	0	0	0	0	HPRC_PLUS	male	3140		EUR	PGP - Ashkenazim Jewish	HG002	HG002 1 JAHKSE010000149.1	29	0.607	0.62	0.625	0.708	FALSE	4	other	other
chr10	134635135	134635136	134758134	+	1	JAHKSE010000371.1	0	1	28298	0	0	0	0	1	0	0	0	0	HPRC_PLUS	male	3140		EUR	PGP - Ashkenazim Jewish	HG002	HG002 1 JAHKSE010000371.1	30	0.565	0.571	0.753	0.313	FALSE	166	Chromosome end	Chromosome end or Poisson
chr10	134651175	134651176	134758134	-	1	JAHKSE010000025.1	7	8	86344611	0	0	0	0	1	0	0	0	0	HPRC_PLUS	male	3140		EUR	PGP - Ashkenazim Jewish	HG002	HG002 1 JAHKSE010000025.1	31	0.564	0.571	0.756	0.313	FALSE	177	Chromosome end	Chromosome end or Poisson
chr10	134663425	134663426	134758134	+	1	JAHKSE010000371.1	28297	28298	28298	0	0	0	0	1	0	0	0	0	HPRC_PLUS	male	3140		EUR	PGP - Ashkenazim Jewish	HG002	HG002 1 JAHKSE010000371.1	32	0.567	0.57	0.756	0.313	FALSE	257	Chromosome end	Chromosome end or Poisson
chr10	134705062	134705063	134758134	+	1	JAHKSE010000496.1	0	1	52776	0	0	0	0	1	0	0	0	0	HPRC_PLUS	male	3140		EUR	PGP - Ashkenazim Jewish	HG002	HG002 1 JAHKSE010000496.1	33	0.565	0.571	0.756	0.313	FALSE	257	Chromosome end	Chromosome end or Poisson
chr10	134757501	134757502	134758134	+	1	JAHKSE010000496.1	52765	52766	52776	0	0	0	0	1	0	0	0	0	HPRC_PLUS	male	3140		EUR	PGP - Ashkenazim Jewish	HG002	HG002 1 JAHKSE010000496.1	34	0.705882	0.58	0.739	0.673	FALSE	185	Chromosome end	Chromosome end or Poisson
chr11	38366	38367	135127769	+	1	JAHKSE010000029.1	0	1	50621521	0	0	0	0	1	0	0	0	0	HPRC_PLUS	male	3140		EUR	PGP - Ashkenazim Jewish	HG002	HG002 1 JAHKSE010000029.1	35	0.615	0.635	0.536	0.733	FALSE	65	Chromosome end	Chromosome end or Poisson
chr11	50695313	50695314	135127769	+	1	JAHKSE010000201.1	0	1	1595220	0	0	0	0	1	0	0	0	0	HPRC_PLUS	male	3140		EUR	PGP - Ashkenazim Jewish	HG002	HG002 1 JAHKSE010000201.1	36	0.566	0.543	0.439	0.661	FALSE	2	Poisson breaks	Chromosome end or Poisson
chr11	50714759	50714760	135127769	+	1	JAHKSE010000029.1	50621520	50621521	50621521	0	0	0	0	1	0	0	0	0	HPRC_PLUS	male	3140		EUR	PGP - Ashkenazim Jewish	HG002	HG002 1 JAHKSE010000029.1	37	0.59	0.553	0.397	0.659	FALSE	2	Poisson breaks	Chromosome end or Poisson
chr11	51244766	51244767	135127769	-	1	JAHKSE010000003.1	81562137	81562138	81564422	0	0	0	0	1	0	0	0	0	HPRC_PLUS	male	3140		EUR	PGP - Ashkenazim Jewish	HG002	HG002 1 JAHKSE010000003.1	38	0.511	0.517	0.411	0.612	FALSE	8	Alpha	Satellite
chr11	52106324	52106325	135127769	+	1	JAHKSE010000289.1	98	99	185935	0	0	0	0	1	0	0	0	0	HPRC_PLUS	male	3140		EUR	PGP - Ashkenazim Jewish	HG002	HG002 1 JAHKSE010000289.1	39	0.512	0.513	0.41	0.609	FALSE	6	Alpha	Satellite
chr11	52652562	52652563	135127769	+	1	JAHKSE010000289.1	182426	182427	185935	0	0	0	0	1	0	0	0	0	HPRC_PLUS	male	3140		EUR	PGP - Ashkenazim Jewish	HG002	HG002 1 JAHKSE010000289.1	40	0.523	0.519	0.411	0.613	FALSE	6	Alpha	Satellite
chr11	53665588	53665589	135127769	+	1	JAHKSE010000201.1	1591102	1591103	1595220	100	100	100	1	0	0	0	0	0	HPRC_PLUS	male	3140		EUR	PGP - Ashkenazim Jewish	HG002	HG002 1 JAHKSE010000201.1	41	0.513	0.519	0.41	0.614	FALSE	7	Alpha	Satellite
chr11	135127768	135127769	135127769	-	1	JAHKSE010000003.1	1491	1492	81564422	0	0	0	0	1	0	0	0	0	HPRC_PLUS	male	3140		EUR	PGP - Ashkenazim Jewish	HG002	HG002 1 JAHKSE010000003.1	42	0.681159	0.576	0.798	0.623	FALSE	94	Chromosome end	Chromosome end or Poisson
chr12	0	1	133324548	+	1	JAHKSE010000063.1	8754	8755	36993178	0	0	0	0	1	0	0	0	0	HPRC_PLUS	male	3140		EUR	PGP - Ashkenazim Jewish	HG002	HG002 1 JAHKSE010000063.1	43	0.577	0.675	0.763	0.505	FALSE	96	Chromosome end	Chromosome end or Poisson
chr12	34932112	34932113	133324548	+	1	JAHKSE010000063.1	36993177	36993178	36993178	100	100	100	1	0	0	0	0	0	HPRC_PLUS	male	3140		EUR	PGP - Ashkenazim Jewish	HG002	HG002 1 JAHKSE010000063.1	44	0.511	0.512	0.393	0.622	FALSE	142	Alpha	Satellite
chr12	34979034	34979035	133324548	+	1	JAHKSE010000017.1	3251	3252	96601322	0	0	0	0	1	0	0	0	0	HPRC_PLUS	male	3140		EUR	PGP - Ashkenazim Jewish	HG002	HG002 1 JAHKSE010000017.1	45	0.508	0.512	0.393	0.623	FALSE	155	Alpha	Satellite
chr12	133318972	133318973	133324548	+	1	JAHKSE010000017.1	96601321	96601322	96601322	0	0	0	0	1	0	0	0	0	HPRC_PLUS	male	3140		EUR	PGP - Ashkenazim Jewish	HG002	HG002 1 JAHKSE010000017.1	46	0.7	0.581	0.561	0.732	FALSE	95	Chromosome end	Chromosome end or Poisson
chr13	9034863	9034864	113566686	+	1	JAHKSE010000314.1	0	1	140530	0	0	0	0	1	0	0	0	0	HPRC_PLUS	male	3140		EUR	PGP - Ashkenazim Jewish	HG002	HG002 1 JAHKSE010000314.1	47	0.558	0.884	0.8	0.543	TRUE	203	SD and High GA/TC (80%)	SD and High GA/TC (80%)
chr13	9147526	9147527	113566686	+	1	JAHKSE010000264.1	0	1	46617	0	0	0	0	1	0	0	0	0	HPRC_PLUS	male	3140		EUR	PGP - Ashkenazim Jewish	HG002	HG002 1 JAHKSE010000264.1	48	0.592	0.885	0.822	0.622	TRUE	1393	SD and High GA/TC (80%)	SD and High GA/TC (80%)
chr13	9150713	9150714	113566686	+	1	JAHKSE010000145.1	0	1	180067	0	0	0	0	1	0	0	0	0	HPRC_PLUS	male	3140		EUR	PGP - Ashkenazim Jewish	HG002	HG002 1 JAHKSE010000145.1	49	0.592	0.853	0.839	0.622	TRUE	1416	SD and High GA/TC (80%)	SD and High GA/TC (80%)
chr13	9154726	9154727	113566686	-	1	JAHKSE010000196.1	101725	101726	101726	0	0	0	0	1	0	0	0	0	HPRC_PLUS	male	3140		EUR	PGP - Ashkenazim Jewish	HG002	HG002 1 JAHKSE010000196.1	50	0.592	0.814	0.84	0.622	TRUE	1475	SD and High GA/TC (80%)	SD and High GA/TC (80%)
chr13	9162473	9162474	113566686	+	1	JAHKSE010000512.1	0	1	28674	0	0	0	0	1	0	0	0	0	HPRC_PLUS	male	3140		EUR	PGP - Ashkenazim Jewish	HG002	HG002 1 JAHKSE010000512.1	51	0.558	0.814	0.84	0.587	TRUE	1597	SD and High GA/TC (80%)	SD and High GA/TC (80%)
chr13	9163829	9163830	113566686	-	1	JAHKSE010000036.1	35526	35527	35527	0	0	0	0	1	0	0	0	0	HPRC_PLUS	male	3140		EUR	PGP - Ashkenazim Jewish	HG002	HG002 1 JAHKSE010000036.1	52	0.558	0.782	0.84	0.577	TRUE	1603	SD	SD and High GA/TC (80%)
chr13	9172198	9172199	113566686	-	1	JAHKSE010000041.1	77084	77085	77085	0	0	0	0	1	0	0	0	0	HPRC_PLUS	male	3140		EUR	PGP - Ashkenazim Jewish	HG002	HG002 1 JAHKSE010000041.1	53	0.558	0.885	0.84	0.544	TRUE	1645	SD and High GA/TC (80%)	SD and High GA/TC (80%)
chr13	9179055	9179056	113566686	+	1	JAHKSE010000208.1	0	1	130018	0	0	0	0	1	0	0	0	0	HPRC_PLUS	male	3140		EUR	PGP - Ashkenazim Jewish	HG002	HG002 1 JAHKSE010000208.1	54	0.542	0.885	0.774	0.544	TRUE	1663	SD and High GA/TC (80%)	SD and High GA/TC (80%)
chr13	9180432	9180433	113566686	+	1	JAHKSE010000314.1	140529	140530	140530	0	0	0	0	1	0	0	0	0	HPRC_PLUS	male	3140		EUR	PGP - Ashkenazim Jewish	HG002	HG002 1 JAHKSE010000314.1	55	0.542	0.885	0.662	0.575	TRUE	1661	SD and High GA/TC (80%)	SD and High GA/TC (80%)
chr13	9191798	9191799	113566686	+	1	JAHKSE010000264.1	46616	46617	46617	0	0	0	0	1	0	0	0	0	HPRC_PLUS	male	3140		EUR	PGP - Ashkenazim Jewish	HG002	HG002 1 JAHKSE010000264.1	56	0.585	0.882	0.773	0.623	TRUE	1669	SD and High GA/TC (80%)	SD and High GA/TC (80%)
chr13	9192587	9192588	113566686	+	1	JAHKSE010000512.1	28673	28674	28674	0	0	0	0	1	0	0	0	0	HPRC_PLUS	male	3140		EUR	PGP - Ashkenazim Jewish	HG002	HG002 1 JAHKSE010000512.1	57	0.585	0.882	0.774	0.623	TRUE	1669	SD and High GA/TC (80%)	SD and High GA/TC (80%)
chr13	9200682	9200683	113566686	-	1	JAHKSE010000036.1	0	1	35527	0	0	0	0	1	0	0	0	0	HPRC_PLUS	male	3140		EUR	PGP - Ashkenazim Jewish	HG002	HG002 1 JAHKSE010000036.1	58	0.585	0.804	0.843	0.623	TRUE	1676	SD and High GA/TC (80%)	SD and High GA/TC (80%)
chr13	9207464	9207465	113566686	-	1	JAHKSE010000203.1	89165	89166	89166	0	0	0	0	1	0	0	0	0	HPRC_PLUS	male	3140		EUR	PGP - Ashkenazim Jewish	HG002	HG002 1 JAHKSE010000203.1	59	0.585	0.804	0.843	0.576	TRUE	1669	SD and High GA/TC (80%)	SD and High GA/TC (80%)
chr13	9212003	9212004	113566686	+	1	JAHKSE010000419.1	0	1	73766	0	0	0	0	1	0	0	0	0	HPRC_PLUS	male	3140		EUR	PGP - Ashkenazim Jewish	HG002	HG002 1 JAHKSE010000419.1	60	0.555	0.78	0.843	0.531	TRUE	1684	SD	SD and High GA/TC (80%)
chr13	9215131	9215132	113566686	+	1	JAHKSE010000313.1	0	1	30089	0	0	0	0	1	0	0	0	0	HPRC_PLUS	male	3140		EUR	PGP - Ashkenazim Jewish	HG002	HG002 1 JAHKSE010000313.1	61	0.555	0.883	0.843	0.538	TRUE	1689	SD and High GA/TC (80%)	SD and High GA/TC (80%)
chr13	9216719	9216720	113566686	-	1	JAHKSE010000298.1	87682	87683	87683	0	0	0	0	1	0	0	0	0	HPRC_PLUS	male	3140		EUR	PGP - Ashkenazim Jewish	HG002	HG002 1 JAHKSE010000298.1	62	0.555	0.883	0.836	0.538	TRUE	1692	SD and High GA/TC (80%)	SD and High GA/TC (80%)
chr13	9217358	9217359	113566686	+	1	JAHKSE010000231.1	35	36	68242	0	0	0	0	1	0	0	0	0	HPRC_PLUS	male	3140		EUR	PGP - Ashkenazim Jewish	HG002	HG002 1 JAHKSE010000231.1	63	0.555	0.883	0.836	0.538	TRUE	1692	SD and High GA/TC (80%)	SD and High GA/TC (80%)
chr13	9218343	9218344	113566686	+	1	JAHKSE010000224.1	0	1	26200	0	0	0	0	1	0	0	0	0	HPRC_PLUS	male	3140		EUR	PGP - Ashkenazim Jewish	HG002	HG002 1 JAHKSE010000224.1	64	0.555	0.883	0.836	0.541	TRUE	1693	SD and High GA/TC (80%)	SD and High GA/TC (80%)
chr13	9219039	9219040	113566686	-	1	JAHKSE010000539.1	28990	28991	28991	0	0	0	0	1	0	0	0	0	HPRC_PLUS	male	3140		EUR	PGP - Ashkenazim Jewish	HG002	HG002 1 JAHKSE010000539.1	65	0.555	0.883	0.836	0.541	TRUE	1694	SD and High GA/TC (80%)	SD and High GA/TC (80%)
chr13	9220269	9220270	113566686	+	1	JAHKSE010000295.1	0	1	32320	0	0	0	0	1	0	0	0	0	HPRC_PLUS	male	3140		EUR	PGP - Ashkenazim Jewish	HG002	HG002 1 JAHKSE010000295.1	66	0.555	0.883	0.812	0.541	TRUE	1697	SD and High GA/TC (80%)	SD and High GA/TC (80%)
chr13	9220882	9220883	113566686	-	1	JAHKSE010000538.1	25864	25865	25865	0	0	0	0	1	0	0	0	0	HPRC_PLUS	male	3140		EUR	PGP - Ashkenazim Jewish	HG002	HG002 1 JAHKSE010000538.1	67	0.555	0.883	0.812	0.541	TRUE	1698	SD and High GA/TC (80%)	SD and High GA/TC (80%)
chr13	9222695	9222696	113566686	-	1	JAHKSE010000173.1	34140	34141	34141	0	0	0	0	1	0	0	0	0	HPRC_PLUS	male	3140		EUR	PGP - Ashkenazim Jewish	HG002	HG002 1 JAHKSE010000173.1	68	0.536	0.883	0.793	0.541	TRUE	1700	SD and High GA/TC (80%)	SD and High GA/TC (80%)
chr13	9231069	9231070	113566686	-	1	JAHKSE010000182.1	30169	30170	30170	0	0	0	0	1	0	0	0	0	HPRC_PLUS	male	3140		EUR	PGP - Ashkenazim Jewish	HG002	HG002 1 JAHKSE010000182.1	69	0.533	0.883	0.607	0.635	TRUE	1681	SD and High GA/TC (80%)	SD and High GA/TC (80%)
chr13	9231555	9231556	113566686	+	1	JAHKSE010000544.1	0	1	30024	0	0	0	0	1	0	0	0	0	HPRC_PLUS	male	3140		EUR	PGP - Ashkenazim Jewish	HG002	HG002 1 JAHKSE010000544.1	70	0.538	0.883	0.607	0.635	TRUE	1678	SD and High GA/TC (80%)	SD and High GA/TC (80%)
chr13	9232970	9232971	113566686	-	1	JAHKSE010000513.1	27185	27186	27186	0	0	0	0	1	0	0	0	0	HPRC_PLUS	male	3140		EUR	PGP - Ashkenazim Jewish	HG002	HG002 1 JAHKSE010000513.1	71	0.59	0.883	0.607	0.635	TRUE	1674	SD and High GA/TC (80%)	SD and High GA/TC (80%)
chr13	9233745	9233746	113566686	-	1	JAHKSE010000369.1	71917	71918	71918	0	0	0	0	1	0	0	0	0	HPRC_PLUS	male	3140		EUR	PGP - Ashkenazim Jewish	HG002	HG002 1 JAHKSE010000369.1	72	0.59	0.883	0.607	0.635	TRUE	1673	SD and High GA/TC (80%)	SD and High GA/TC (80%)
chr13	9237400	9237401	113566686	+	1	JAHKSE010000197.1	0	1	27749	0	0	0	0	1	0	0	0	0	HPRC_PLUS	male	3140		EUR	PGP - Ashkenazim Jewish	HG002	HG002 1 JAHKSE010000197.1	73	0.59	0.882	0.775	0.635	TRUE	1661	SD and High GA/TC (80%)	SD and High GA/TC (80%)
chr13	9239092	9239093	113566686	-	1	JAHKSE010000202.1	47569	47570	47570	0	0	0	0	1	0	0	0	0	HPRC_PLUS	male	3140		EUR	PGP - Ashkenazim Jewish	HG002	HG002 1 JAHKSE010000202.1	74	0.59	0.882	0.841	0.635	TRUE	1652	SD and High GA/TC (80%)	SD and High GA/TC (80%)
chr13	9244457	9244458	113566686	+	1	JAHKSE010000224.1	26199	26200	26200	0	0	0	0	1	0	0	0	0	HPRC_PLUS	male	3140		EUR	PGP - Ashkenazim Jewish	HG002	HG002 1 JAHKSE010000224.1	75	0.59	0.813	0.841	0.635	TRUE	1627	SD and High GA/TC (80%)	SD and High GA/TC (80%)
chr13	9245222	9245223	113566686	+	1	JAHKSE010000313.1	30086	30087	30089	0	0	0	0	1	0	0	0	0	HPRC_PLUS	male	3140		EUR	PGP - Ashkenazim Jewish	HG002	HG002 1 JAHKSE010000313.1	76	0.59	0.813	0.841	0.635	TRUE	1615	SD and High GA/TC (80%)	SD and High GA/TC (80%)
chr13	9246762	9246763	113566686	-	1	JAHKSE010000538.1	0	1	25865	0	0	0	0	1	0	0	0	0	HPRC_PLUS	male	3140		EUR	PGP - Ashkenazim Jewish	HG002	HG002 1 JAHKSE010000538.1	77	0.59	0.813	0.841	0.588	TRUE	1606	SD and High GA/TC (80%)	SD and High GA/TC (80%)
chr13	9248048	9248049	113566686	-	1	JAHKSE010000539.1	0	1	28991	0	0	0	0	1	0	0	0	0	HPRC_PLUS	male	3140		EUR	PGP - Ashkenazim Jewish	HG002	HG002 1 JAHKSE010000539.1	78	0.59	0.813	0.841	0.588	TRUE	1601	SD and High GA/TC (80%)	SD and High GA/TC (80%)
chr13	9249273	9249274	113566686	-	1	JAHKSE010000041.1	0	1	77085	0	0	0	0	1	0	0	0	0	HPRC_PLUS	male	3140		EUR	PGP - Ashkenazim Jewish	HG002	HG002 1 JAHKSE010000041.1	79	0.59	0.813	0.841	0.588	TRUE	1593	SD and High GA/TC (80%)	SD and High GA/TC (80%)
chr13	9252759	9252760	113566686	+	1	JAHKSE010000295.1	32319	32320	32320	0	0	0	0	1	0	0	0	0	HPRC_PLUS	male	3140		EUR	PGP - Ashkenazim Jewish	HG002	HG002 1 JAHKSE010000295.1	80	0.59	0.813	0.841	0.588	TRUE	1567	SD and High GA/TC (80%)	SD and High GA/TC (80%)
chr13	9256827	9256828	113566686	-	1	JAHKSE010000173.1	0	1	34141	0	0	0	0	1	0	0	0	0	HPRC_PLUS	male	3140		EUR	PGP - Ashkenazim Jewish	HG002	HG002 1 JAHKSE010000173.1	81	0.557	0.78	0.841	0.531	TRUE	1536	SD	SD and High GA/TC (80%)
chr13	9257823	9257824	113566686	-	1	JAHKSE010000196.1	0	1	101726	0	0	0	0	1	0	0	0	0	HPRC_PLUS	male	3140		EUR	PGP - Ashkenazim Jewish	HG002	HG002 1 JAHKSE010000196.1	82	0.557	0.78	0.841	0.531	TRUE	1526	SD	SD and High GA/TC (80%)
chr13	9260171	9260172	113566686	-	1	JAHKSE010000513.1	0	1	27186	0	0	0	0	1	0	0	0	0	HPRC_PLUS	male	3140		EUR	PGP - Ashkenazim Jewish	HG002	HG002 1 JAHKSE010000513.1	83	0.557	0.884	0.837	0.543	TRUE	1499	SD and High GA/TC (80%)	SD and High GA/TC (80%)
chr13	9261239	9261240	113566686	-	1	JAHKSE010000182.1	0	1	30170	0	0	0	0	1	0	0	0	0	HPRC_PLUS	male	3140		EUR	PGP - Ashkenazim Jewish	HG002	HG002 1 JAHKSE010000182.1	84	0.557	0.884	0.835	0.543	TRUE	1491	SD and High GA/TC (80%)	SD and High GA/TC (80%)
chr13	9261459	9261460	113566686	-	1	JAHKSE010000579.1	36150	36151	36151	0	0	0	0	1	0	0	0	0	HPRC_PLUS	male	3140		EUR	PGP - Ashkenazim Jewish	HG002	HG002 1 JAHKSE010000579.1	85	0.557	0.884	0.835	0.543	TRUE	1491	SD and High GA/TC (80%)	SD and High GA/TC (80%)
chr13	9261565	9261566	113566686	+	1	JAHKSE010000544.1	30023	30024	30024	0	0	0	0	1	0	0	0	0	HPRC_PLUS	male	3140		EUR	PGP - Ashkenazim Jewish	HG002	HG002 1 JAHKSE010000544.1	86	0.557	0.884	0.835	0.543	TRUE	1490	SD and High GA/TC (80%)	SD and High GA/TC (80%)
chr13	9265085	9265086	113566686	+	1	JAHKSE010000197.1	27748	27749	27749	0	0	0	0	1	0	0	0	0	HPRC_PLUS	male	3140		EUR	PGP - Ashkenazim Jewish	HG002	HG002 1 JAHKSE010000197.1	87	0.557	0.885	0.808	0.545	TRUE	1461	SD and High GA/TC (80%)	SD and High GA/TC (80%)
chr13	9272513	9272514	113566686	+	1	JAHKSE010000381.1	0	1	26850	0	0	0	0	1	0	0	0	0	HPRC_PLUS	male	3140		EUR	PGP - Ashkenazim Jewish	HG002	HG002 1 JAHKSE010000381.1	88	0.537	0.885	0.608	0.545	TRUE	1429	SD and High GA/TC (80%)	SD and High GA/TC (80%)
chr13	9272932	9272933	113566686	+	1	JAHKSE010000597.1	0	1	29854	0	0	0	0	1	0	0	0	0	HPRC_PLUS	male	3140		EUR	PGP - Ashkenazim Jewish	HG002	HG002 1 JAHKSE010000597.1	89	0.537	0.885	0.608	0.545	TRUE	1425	SD and High GA/TC (80%)	SD and High GA/TC (80%)
chr13	9286724	9286725	113566686	-	1	JAHKSE010000287.1	36339	36340	36340	0	0	0	0	1	0	0	0	0	HPRC_PLUS	male	3140		EUR	PGP - Ashkenazim Jewish	HG002	HG002 1 JAHKSE010000287.1	90	0.599	0.881	0.773	0.642	TRUE	1303	SD and High GA/TC (80%)	SD and High GA/TC (80%)
chr13	9290302	9290303	113566686	+	1	JAHKSE010000419.1	73763	73764	73766	0	0	0	0	1	0	0	0	0	HPRC_PLUS	male	3140		EUR	PGP - Ashkenazim Jewish	HG002	HG002 1 JAHKSE010000419.1	91	0.599	0.849	0.843	0.642	TRUE	1259	SD and High GA/TC (80%)	SD and High GA/TC (80%)
chr13	9290811	9290812	113566686	+	1	JAHKSE010000231.1	68241	68242	68242	0	0	0	0	1	0	0	0	0	HPRC_PLUS	male	3140		EUR	PGP - Ashkenazim Jewish	HG002	HG002 1 JAHKSE010000231.1	92	0.599	0.849	0.843	0.642	TRUE	1253	SD and High GA/TC (80%)	SD and High GA/TC (80%)
chr13	9291867	9291868	113566686	-	1	JAHKSE010000202.1	0	1	47570	0	0	0	0	1	0	0	0	0	HPRC_PLUS	male	3140		EUR	PGP - Ashkenazim Jewish	HG002	HG002 1 JAHKSE010000202.1	93	0.599	0.849	0.843	0.642	TRUE	1235	SD and High GA/TC (80%)	SD and High GA/TC (80%)
chr13	9293096	9293097	113566686	-	1	JAHKSE010000579.1	0	1	36151	0	0	0	0	1	0	0	0	0	HPRC_PLUS	male	3140		EUR	PGP - Ashkenazim Jewish	HG002	HG002 1 JAHKSE010000579.1	94	0.599	0.848	0.843	0.642	TRUE	1216	SD and High GA/TC (80%)	SD and High GA/TC (80%)
chr13	9293868	9293869	113566686	-	1	JAHKSE010000203.1	0	1	89166	0	0	0	0	1	0	0	0	0	HPRC_PLUS	male	3140		EUR	PGP - Ashkenazim Jewish	HG002	HG002 1 JAHKSE010000203.1	95	0.599	0.809	0.843	0.642	TRUE	1208	SD and High GA/TC (80%)	SD and High GA/TC (80%)
chr13	9299388	9299389	113566686	+	1	JAHKSE010000381.1	26849	26850	26850	0	0	0	0	1	0	0	0	0	HPRC_PLUS	male	3140		EUR	PGP - Ashkenazim Jewish	HG002	HG002 1 JAHKSE010000381.1	96	0.599	0.809	0.843	0.588	TRUE	1161	SD and High GA/TC (80%)	SD and High GA/TC (80%)
chr13	9302678	9302679	113566686	+	1	JAHKSE010000597.1	29832	29833	29854	0	0	0	0	1	0	0	0	0	HPRC_PLUS	male	3140		EUR	PGP - Ashkenazim Jewish	HG002	HG002 1 JAHKSE010000597.1	97	0.557	0.809	0.843	0.588	TRUE	1139	SD and High GA/TC (80%)	SD and High GA/TC (80%)
chr13	9308877	9308878	113566686	-	1	JAHKSE010000298.1	0	1	87683	0	0	0	0	1	0	0	0	0	HPRC_PLUS	male	3140		EUR	PGP - Ashkenazim Jewish	HG002	HG002 1 JAHKSE010000298.1	98	0.557	0.883	0.843	0.537	TRUE	1063	SD and High GA/TC (80%)	SD and High GA/TC (80%)
chr13	9309938	9309939	113566686	-	1	JAHKSE010000369.1	47	48	71918	0	0	0	0	1	0	0	0	0	HPRC_PLUS	male	3140		EUR	PGP - Ashkenazim Jewish	HG002	HG002 1 JAHKSE010000369.1	99	0.557	0.883	0.835	0.537	TRUE	1056	SD and High GA/TC (80%)	SD and High GA/TC (80%)
chr13	9314591	9314592	113566686	+	1	JAHKSE010000208.1	130017	130018	130018	0	0	0	0	1	0	0	0	0	HPRC_PLUS	male	3140		EUR	PGP - Ashkenazim Jewish	HG002	HG002 1 JAHKSE010000208.1	100	0.557	0.883	0.814	0.541	TRUE	985	SD and High GA/TC (80%)	SD and High GA/TC (80%)
chr13	9322932	9322933	113566686	-	1	JAHKSE010000287.1	0	1	36340	0	0	0	0	1	0	0	0	0	HPRC_PLUS	male	3140		EUR	PGP - Ashkenazim Jewish	HG002	HG002 1 JAHKSE010000287.1	101	0.53	0.883	0.605	0.622	TRUE	806	SD and High GA/TC (80%)	SD and High GA/TC (80%)
chr13	9337915	9337916	113566686	+	1	JAHKSE010000145.1	180066	180067	180067	0	0	0	0	1	0	0	0	0	HPRC_PLUS	male	3140		EUR	PGP - Ashkenazim Jewish	HG002	HG002 1 JAHKSE010000145.1	102	0.596	0.851	0.843	0.622	TRUE	571	SD and High GA/TC (80%)	SD and High GA/TC (80%)
chr13	10992072	10992073	113566686	-	1	JAHKSE010000214.1	0	1	1304204	0	0	0	0	1	0	0	0	0	HPRC_PLUS	male	3140		EUR	PGP - Ashkenazim Jewish	HG002	HG002 1 JAHKSE010000214.1	103	0.717	0.725	0.657	0.916	TRUE	11	SD	SD and High GA/TC (80%)
chr13	11514209	11514210	113566686	-	1	JAHKSE010000009.1	73761	73762	73762	0	0	0	0	1	0	0	0	0	HPRC_PLUS	male	3140		EUR	PGP - Ashkenazim Jewish	HG002	HG002 1 JAHKSE010000009.1	104	0.628	0.596	0.513	0.679	TRUE	6	SD	SD and High GA/TC (80%)
chr13	11587967	11587968	113566686	-	1	JAHKSE010000009.1	0	1	73762	0	0	0	0	1	0	0	0	0	HPRC_PLUS	male	3140		EUR	PGP - Ashkenazim Jewish	HG002	HG002 1 JAHKSE010000009.1	105	0.824	0.582	0.477	0.725	TRUE	7	SD and High GA/TC (80%)	SD and High GA/TC (80%)
chr13	12776679	12776680	113566686	+	1	JAHKSE010000225.1	0	1	2246159	0	0	0	0	1	0	0	0	0	HPRC_PLUS	male	3140		EUR	PGP - Ashkenazim Jewish	HG002	HG002 1 JAHKSE010000225.1	106	0.631	0.615	0.503	0.716	TRUE	3	SD	SD and High GA/TC (80%)
chr13	15090284	15090285	113566686	+	1	JAHKSE010000358.1	150856	150857	151625	0	0	0	0	1	0	0	0	0	HPRC_PLUS	male	3140		EUR	PGP - Ashkenazim Jewish	HG002	HG002 1 JAHKSE010000358.1	107	0.555	0.468	0.236	0.787	FALSE	26	Satellite	Satellite
chr13	15095068	15095069	113566686	+	1	JAHKSE010000225.1	2243646	2243647	2246159	100	100	100	1	0	0	0	0	0	HPRC_PLUS	male	3140		EUR	PGP - Ashkenazim Jewish	HG002	HG002 1 JAHKSE010000225.1	108	0.555	0.468	0.236	0.787	FALSE	27	Satellite	Satellite
chr13	15306267	15306268	113566686	+	1	JAHKSE010000358.1	0	1	151625	0	0	0	0	1	0	0	0	0	HPRC_PLUS	male	3140		EUR	PGP - Ashkenazim Jewish	HG002	HG002 1 JAHKSE010000358.1	109	0.556	0.468	0.238	0.788	FALSE	93	Satellite	Satellite
chr13	15598996	15598997	113566686	+	1	JAHKSE010000167.1	0	1	27855	0	0	0	0	1	0	0	0	0	HPRC_PLUS	male	3140		EUR	PGP - Ashkenazim Jewish	HG002	HG002 1 JAHKSE010000167.1	110	0.491	0.534	0.399	0.622	FALSE	25	Alpha	Satellite
chr13	15626340	15626341	113566686	+	1	JAHKSE010000167.1	27854	27855	27855	0	0	0	0	1	0	0	0	0	HPRC_PLUS	male	3140		EUR	PGP - Ashkenazim Jewish	HG002	HG002 1 JAHKSE010000167.1	111	0.491	0.533	0.398	0.624	FALSE	18	Alpha	Satellite
chr13	17505387	17505388	113566686	+	1	JAHKSE010000013.1	8544676	8544677	8544677	0	0	0	0	1	0	0	0	0	HPRC_PLUS	male	3140		EUR	PGP - Ashkenazim Jewish	HG002	HG002 1 JAHKSE010000013.1	112	0.512	0.534	0.392	0.655	FALSE	46	SD	SD and High GA/TC (80%)
chr13	51477129	51477130	113566686	+	1	JAHKSE010000265.1	0	1	32339	0	0	0	0	1	0	0	0	0	HPRC_PLUS	male	3140		EUR	PGP - Ashkenazim Jewish	HG002	HG002 1 JAHKSE010000265.1	113	0.631	0.612	0.568	0.729	FALSE	5	SD	SD and High GA/TC (80%)
chr13	51509471	51509472	113566686	+	1	JAHKSE010000265.1	32338	32339	32339	0	0	0	0	1	0	0	0	0	HPRC_PLUS	male	3140		EUR	PGP - Ashkenazim Jewish	HG002	HG002 1 JAHKSE010000265.1	114	0.604	0.637	0.576	0.716	FALSE	5	SD	SD and High GA/TC (80%)
chr13	56363169	56363170	113566686	-	1	JAHKSE010000170.1	25358	25359	25359	0	0	0	0	1	0	0	0	0	HPRC_PLUS	male	3140		EUR	PGP - Ashkenazim Jewish	HG002	HG002 1 JAHKSE010000170.1	115	0.612	0.636	0.596	0.738	FALSE	179	SD	SD and High GA/TC (80%)
chr13	56388538	56388539	113566686	-	1	JAHKSE010000170.1	0	1	25359	0	0	0	0	1	0	0	0	0	HPRC_PLUS	male	3140		EUR	PGP - Ashkenazim Jewish	HG002	HG002 1 JAHKSE010000170.1	116	0.613	0.638	0.599	0.659	FALSE	179	SD	SD and High GA/TC (80%)
chr13	113566685	113566686	113566686	-	1	JAHKSE010000070.1	6595	6596	97465776	0	0	0	0	1	0	0	0	0	HPRC_PLUS	male	3140		EUR	PGP - Ashkenazim Jewish	HG002	HG002 1 JAHKSE010000070.1	117	0.682	0.567	0.751	0.67	FALSE	93	Chromosome end	Chromosome end or Poisson
chr14	141510	141511	101161492	+	1	JAHKSE010000039.1	3	4	2787197	0	0	0	0	1	0	0	0	0	HPRC_PLUS	male	3140		EUR	PGP - Ashkenazim Jewish	HG002	HG002 1 JAHKSE010000039.1	118	0.555	0.648	0.58	0.613	TRUE	27	Chromosome end	Chromosome end or Poisson
chr14	2101410	2101411	101161492	+	1	JAHKSE010000559.1	0	1	56501	0	0	0	0	1	0	0	0	0	HPRC_PLUS	male	3140		EUR	PGP - Ashkenazim Jewish	HG002	HG002 1 JAHKSE010000559.1	119	0.567	0.847	0.843	0.618	TRUE	151	SD and High GA/TC (80%)	SD and High GA/TC (80%)
chr14	2128472	2128473	101161492	-	1	JAHKSE010000171.1	26645	26646	26646	0	0	0	0	1	0	0	0	0	HPRC_PLUS	male	3140		EUR	PGP - Ashkenazim Jewish	HG002	HG002 1 JAHKSE010000171.1	120	0.536	0.882	0.61	0.635	TRUE	175	SD and High GA/TC (80%)	SD and High GA/TC (80%)
chr14	2153422	2153423	101161492	+	1	JAHKSE010000559.1	56500	56501	56501	0	0	0	0	1	0	0	0	0	HPRC_PLUS	male	3140		EUR	PGP - Ashkenazim Jewish	HG002	HG002 1 JAHKSE010000559.1	121	0.595	0.807	0.843	0.587	TRUE	187	SD and High GA/TC (80%)	SD and High GA/TC (80%)
chr14	2155113	2155114	101161492	-	1	JAHKSE010000171.1	0	1	26646	0	0	0	0	1	0	0	0	0	HPRC_PLUS	male	3140		EUR	PGP - Ashkenazim Jewish	HG002	HG002 1 JAHKSE010000171.1	122	0.559	0.807	0.843	0.587	TRUE	192	SD and High GA/TC (80%)	SD and High GA/TC (80%)
chr14	2212199	2212200	101161492	+	1	JAHKSE010000307.1	0	1	26405	0	0	0	0	1	0	0	0	0	HPRC_PLUS	male	3140		EUR	PGP - Ashkenazim Jewish	HG002	HG002 1 JAHKSE010000307.1	123	0.552	0.882	0.797	0.538	TRUE	196	SD and High GA/TC (80%)	SD and High GA/TC (80%)
chr14	2238636	2238637	101161492	+	1	JAHKSE010000307.1	26404	26405	26405	0	0	0	0	1	0	0	0	0	HPRC_PLUS	male	3140		EUR	PGP - Ashkenazim Jewish	HG002	HG002 1 JAHKSE010000307.1	124	0.589	0.809	0.843	0.584	TRUE	175	SD and High GA/TC (80%)	SD and High GA/TC (80%)
chr14	2251585	2251586	101161492	+	1	JAHKSE010000507.1	0	1	38795	0	0	0	0	1	0	0	0	0	HPRC_PLUS	male	3140		EUR	PGP - Ashkenazim Jewish	HG002	HG002 1 JAHKSE010000507.1	125	0.555	0.884	0.838	0.545	TRUE	167	SD and High GA/TC (80%)	SD and High GA/TC (80%)
chr14	2290414	2290415	101161492	+	1	JAHKSE010000507.1	38791	38792	38795	0	0	0	0	1	0	0	0	0	HPRC_PLUS	male	3140		EUR	PGP - Ashkenazim Jewish	HG002	HG002 1 JAHKSE010000507.1	126	0.556	0.737	0.844	0.527	TRUE	145	SD	SD and High GA/TC (80%)
chr14	2336470	2336471	101161492	+	1	JAHKSE010000582.1	0	1	34362	0	0	0	0	1	0	0	0	0	HPRC_PLUS	male	3140		EUR	PGP - Ashkenazim Jewish	HG002	HG002 1 JAHKSE010000582.1	127	0.554	0.879	0.845	0.537	TRUE	127	SD and High GA/TC (80%)	SD and High GA/TC (80%)
chr14	2371168	2371169	101161492	+	1	JAHKSE010000582.1	34361	34362	34362	0	0	0	0	1	0	0	0	0	HPRC_PLUS	male	3140		EUR	PGP - Ashkenazim Jewish	HG002	HG002 1 JAHKSE010000582.1	128	0.596	0.81	0.845	0.583	TRUE	108	SD and High GA/TC (80%)	SD and High GA/TC (80%)
chr14	2389463	2389464	101161492	+	1	JAHKSE010000227.1	0	1	40101	0	0	0	0	1	0	0	0	0	HPRC_PLUS	male	3140		EUR	PGP - Ashkenazim Jewish	HG002	HG002 1 JAHKSE010000227.1	129	0.556	0.883	0.795	0.542	TRUE	112	SD and High GA/TC (80%)	SD and High GA/TC (80%)
chr14	2427437	2427438	101161492	+	1	JAHKSE010000227.1	37985	37986	40101	0	0	0	0	1	0	0	0	0	HPRC_PLUS	male	3140		EUR	PGP - Ashkenazim Jewish	HG002	HG002 1 JAHKSE010000227.1	130	0.557	0.883	0.84	0.543	TRUE	121	SD and High GA/TC (80%)	SD and High GA/TC (80%)
chr14	2436535	2436536	101161492	-	1	JAHKSE010000521.1	37420	37421	37421	0	0	0	0	1	0	0	0	0	HPRC_PLUS	male	3140		EUR	PGP - Ashkenazim Jewish	HG002	HG002 1 JAHKSE010000521.1	131	0.535	0.883	0.786	0.632	TRUE	120	SD and High GA/TC (80%)	SD and High GA/TC (80%)
chr14	2472495	2472496	101161492	-	1	JAHKSE010000521.1	1472	1473	37421	0	0	0	0	1	0	0	0	0	HPRC_PLUS	male	3140		EUR	PGP - Ashkenazim Jewish	HG002	HG002 1 JAHKSE010000521.1	132	0.561	0.881	0.838	0.538	TRUE	127	SD and High GA/TC (80%)	SD and High GA/TC (80%)
chr14	2608799	2608800	101161492	-	1	JAHKSE010000154.1	3226231	3226232	3245339	0	0	0	0	1	0	0	0	0	HPRC_PLUS	male	3140		EUR	PGP - Ashkenazim Jewish	HG002	HG002 1 JAHKSE010000154.1	133	0.556	0.882	0.815	0.545	TRUE	322	SD and High GA/TC (80%)	SD and High GA/TC (80%)
chr14	2696111	2696112	101161492	+	1	JAHKSE010000529.1	0	1	50311	0	0	0	0	1	0	0	0	0	HPRC_PLUS	male	3140		EUR	PGP - Ashkenazim Jewish	HG002	HG002 1 JAHKSE010000529.1	134	0.558	0.883	0.837	0.54	TRUE	820	SD and High GA/TC (80%)	SD and High GA/TC (80%)
chr14	2732995	2732996	101161492	-	1	JAHKSE010000006.1	32897	32898	32898	0	0	0	0	1	0	0	0	0	HPRC_PLUS	male	3140		EUR	PGP - Ashkenazim Jewish	HG002	HG002 1 JAHKSE010000006.1	135	0.557	0.743	0.843	0.536	TRUE	811	SD	SD and High GA/TC (80%)
chr14	2735157	2735158	101161492	+	1	JAHKSE010000281.1	0	1	27618	0	0	0	0	1	0	0	0	0	HPRC_PLUS	male	3140		EUR	PGP - Ashkenazim Jewish	HG002	HG002 1 JAHKSE010000281.1	136	0.557	0.882	0.843	0.542	TRUE	811	SD and High GA/TC (80%)	SD and High GA/TC (80%)
chr14	2737250	2737251	101161492	-	1	JAHKSE010000445.1	44138	44139	44139	0	0	0	0	1	0	0	0	0	HPRC_PLUS	male	3140		EUR	PGP - Ashkenazim Jewish	HG002	HG002 1 JAHKSE010000445.1	137	0.557	0.882	0.839	0.542	TRUE	811	SD and High GA/TC (80%)	SD and High GA/TC (80%)
chr14	2740418	2740419	101161492	-	1	JAHKSE010000245.1	42343	42344	42344	0	0	0	0	1	0	0	0	0	HPRC_PLUS	male	3140		EUR	PGP - Ashkenazim Jewish	HG002	HG002 1 JAHKSE010000245.1	138	0.557	0.883	0.839	0.542	TRUE	810	SD and High GA/TC (80%)	SD and High GA/TC (80%)
chr14	2745615	2745616	101161492	+	1	JAHKSE010000529.1	50310	50311	50311	0	0	0	0	1	0	0	0	0	HPRC_PLUS	male	3140		EUR	PGP - Ashkenazim Jewish	HG002	HG002 1 JAHKSE010000529.1	139	0.537	0.883	0.785	0.542	TRUE	804	SD and High GA/TC (80%)	SD and High GA/TC (80%)
chr14	2748374	2748375	101161492	+	1	JAHKSE010000543.1	0	1	42838	0	0	0	0	1	0	0	0	0	HPRC_PLUS	male	3140		EUR	PGP - Ashkenazim Jewish	HG002	HG002 1 JAHKSE010000543.1	140	0.537	0.883	0.609	0.629	TRUE	798	SD and High GA/TC (80%)	SD and High GA/TC (80%)
chr14	2762929	2762930	101161492	+	1	JAHKSE010000281.1	27617	27618	27618	0	0	0	0	1	0	0	0	0	HPRC_PLUS	male	3140		EUR	PGP - Ashkenazim Jewish	HG002	HG002 1 JAHKSE010000281.1	141	0.59	0.846	0.842	0.629	TRUE	762	SD and High GA/TC (80%)	SD and High GA/TC (80%)
chr14	2766566	2766567	101161492	-	1	JAHKSE010000006.1	0	1	32898	0	0	0	0	1	0	0	0	0	HPRC_PLUS	male	3140		EUR	PGP - Ashkenazim Jewish	HG002	HG002 1 JAHKSE010000006.1	142	0.59	0.81	0.842	0.629	TRUE	759	SD and High GA/TC (80%)	SD and High GA/TC (80%)
chr14	2781417	2781418	101161492	-	1	JAHKSE010000445.1	0	1	44139	0	0	0	0	1	0	0	0	0	HPRC_PLUS	male	3140		EUR	PGP - Ashkenazim Jewish	HG002	HG002 1 JAHKSE010000445.1	143	0.559	0.881	0.838	0.539	TRUE	742	SD and High GA/TC (80%)	SD and High GA/TC (80%)
chr14	2782767	2782768	101161492	-	1	JAHKSE010000245.1	0	1	42344	0	0	0	0	1	0	0	0	0	HPRC_PLUS	male	3140		EUR	PGP - Ashkenazim Jewish	HG002	HG002 1 JAHKSE010000245.1	144	0.559	0.881	0.838	0.539	TRUE	740	SD and High GA/TC (80%)	SD and High GA/TC (80%)
chr14	2790354	2790355	101161492	+	1	JAHKSE010000543.1	42837	42838	42838	0	0	0	0	1	0	0	0	0	HPRC_PLUS	male	3140		EUR	PGP - Ashkenazim Jewish	HG002	HG002 1 JAHKSE010000543.1	145	0.533	0.882	0.786	0.6	TRUE	733	SD and High GA/TC (80%)	SD and High GA/TC (80%)
chr14	3616652	3616653	101161492	-	1	JAHKSE010000051.1	8779137	8779138	8781137	0	0	0	0	1	0	0	0	0	HPRC_PLUS	male	3140		EUR	PGP - Ashkenazim Jewish	HG002	HG002 1 JAHKSE010000051.1	146	0.67	0.609	0.543	0.905	TRUE	319	SD	SD and High GA/TC (80%)
chr14	3616652	3616653	101161492	+	1	JAHKSE010000341.1	15191	15192	84689	0	0	0	0	1	0	0	0	0	HPRC_PLUS	male	3140		EUR	PGP - Ashkenazim Jewish	HG002	HG002 1 JAHKSE010000341.1	147	0.67	0.609	0.543	0.905	TRUE	319	SD	SD and High GA/TC (80%)
chr14	3616652	3616653	101161492	+	1	JAHKSE010000349.1	8686	8687	357624	0	0	0	0	1	0	0	0	0	HPRC_PLUS	male	3140		EUR	PGP - Ashkenazim Jewish	HG002	HG002 1 JAHKSE010000349.1	148	0.67	0.609	0.543	0.905	TRUE	319	SD	SD and High GA/TC (80%)
chr14	3616652	3616653	101161492	-	1	JAHKSE010000412.1	104680	104681	104829	0	0	0	0	1	0	0	0	0	HPRC_PLUS	male	3140		EUR	PGP - Ashkenazim Jewish	HG002	HG002 1 JAHKSE010000412.1	149	0.67	0.609	0.543	0.905	TRUE	319	SD	SD and High GA/TC (80%)
chr14	3616652	3616653	101161492	-	1	JAHKSE010000478.1	116669	116670	121937	0	0	0	0	1	0	0	0	0	HPRC_PLUS	male	3140		EUR	PGP - Ashkenazim Jewish	HG002	HG002 1 JAHKSE010000478.1	150	0.67	0.609	0.543	0.905	TRUE	319	SD	SD and High GA/TC (80%)
chr14	3616765	3616766	101161492	-	1	JAHKSE010000447.1	94514	94515	94518	0	0	0	0	1	0	0	0	0	HPRC_PLUS	male	3140		EUR	PGP - Ashkenazim Jewish	HG002	HG002 1 JAHKSE010000447.1	151	0.67	0.609	0.543	0.905	TRUE	319	SD	SD and High GA/TC (80%)
chr14	3619124	3619125	101161492	+	1	JAHKSE010000378.1	120	121	84393	0	0	0	0	1	0	0	0	0	HPRC_PLUS	male	3140		EUR	PGP - Ashkenazim Jewish	HG002	HG002 1 JAHKSE010000378.1	152	0.608	0.609	0.528	0.905	TRUE	319	SD	SD and High GA/TC (80%)
chr14	3671065	3671066	101161492	+	1	JAHKSE010000283.1	512601	512602	536541	0	0	0	0	1	0	0	0	0	HPRC_PLUS	male	3140		EUR	PGP - Ashkenazim Jewish	HG002	HG002 1 JAHKSE010000283.1	153	0.539	0.545	0.391	0.891	TRUE	319	SD	SD and High GA/TC (80%)
chr14	3671404	3671405	101161492	+	1	JAHKSE010000209.1	1383217	1383218	1408480	0	0	0	0	1	0	0	0	0	HPRC_PLUS	male	3140		EUR	PGP - Ashkenazim Jewish	HG002	HG002 1 JAHKSE010000209.1	154	0.539	0.545	0.391	0.891	TRUE	319	SD	SD and High GA/TC (80%)
chr14	3686043	3686044	101161492	+	1	JAHKSE010000341.1	84602	84603	84689	0	0	0	0	1	0	0	0	0	HPRC_PLUS	male	3140		EUR	PGP - Ashkenazim Jewish	HG002	HG002 1 JAHKSE010000341.1	155	0.535	0.553	0.392	0.898	TRUE	319	SD	SD and High GA/TC (80%)
chr14	3692430	3692431	101161492	-	1	JAHKSE010000478.1	0	1	121937	0	0	0	0	1	0	0	0	0	HPRC_PLUS	male	3140		EUR	PGP - Ashkenazim Jewish	HG002	HG002 1 JAHKSE010000478.1	156	0.534	0.752	0.413	0.898	TRUE	319	SD	SD and High GA/TC (80%)
chr14	3694273	3694274	101161492	-	1	JAHKSE010000447.1	285	286	94518	0	0	0	0	1	0	0	0	0	HPRC_PLUS	male	3140		EUR	PGP - Ashkenazim Jewish	HG002	HG002 1 JAHKSE010000447.1	157	0.532	0.752	0.423	0.898	TRUE	319	SD	SD and High GA/TC (80%)
chr14	3694946	3694947	101161492	+	1	JAHKSE010000378.1	75759	75760	84393	0	0	0	0	1	0	0	0	0	HPRC_PLUS	male	3140		EUR	PGP - Ashkenazim Jewish	HG002	HG002 1 JAHKSE010000378.1	158	0.532	0.752	0.43	0.898	TRUE	319	SD	SD and High GA/TC (80%)
chr14	3694946	3694947	101161492	-	1	JAHKSE010000156.1	26928	26929	2429413	0	0	0	0	1	0	0	0	0	HPRC_PLUS	male	3140		EUR	PGP - Ashkenazim Jewish	HG002	HG002 1 JAHKSE010000156.1	159	0.532	0.752	0.43	0.898	TRUE	319	SD	SD and High GA/TC (80%)
chr14	3694946	3694947	101161492	-	1	JAHKSE010000412.1	69	70	104829	0	0	0	0	1	0	0	0	0	HPRC_PLUS	male	3140		EUR	PGP - Ashkenazim Jewish	HG002	HG002 1 JAHKSE010000412.1	160	0.532	0.752	0.43	0.898	TRUE	319	SD	SD and High GA/TC (80%)
chr14	4085350	4085351	101161492	-	1	JAHKSE010000122.1	2483434	2483435	2538109	0	0	0	0	1	0	0	0	0	HPRC_PLUS	male	3140		EUR	PGP - Ashkenazim Jewish	HG002	HG002 1 JAHKSE010000122.1	161	0.584	0.624	0.684	0.721	TRUE	14	SD	SD and High GA/TC (80%)
chr14	5738880	5738881	101161492	+	1	JAHKSE010000229.1	21956	21957	1768071	0	0	0	0	1	0	0	0	0	HPRC_PLUS	male	3140		EUR	PGP - Ashkenazim Jewish	HG002	HG002 1 JAHKSE010000229.1	162	0.59	0.599	0.58	0.731	TRUE	7	SD	SD and High GA/TC (80%)
chr14	5871432	5871433	101161492	+	1	JAHKSE010000192.1	0	1	130363	0	0	0	0	1	0	0	0	0	HPRC_PLUS	male	3140		EUR	PGP - Ashkenazim Jewish	HG002	HG002 1 JAHKSE010000192.1	163	0.637	0.544	0.584	0.655	TRUE	12	SD	SD and High GA/TC (80%)
chr14	5892238	5892239	101161492	-	1	JAHKSE010000195.1	0	1	2562192	0	0	0	0	1	0	0	0	0	HPRC_PLUS	male	3140		EUR	PGP - Ashkenazim Jewish	HG002	HG002 1 JAHKSE010000195.1	164	0.756	0.57	0.568	0.795	TRUE	12	SD	SD and High GA/TC (80%)
chr14	6001734	6001735	101161492	+	1	JAHKSE010000192.1	130362	130363	130363	0	0	0	0	1	0	0	0	0	HPRC_PLUS	male	3140		EUR	PGP - Ashkenazim Jewish	HG002	HG002 1 JAHKSE010000192.1	165	0.722	0.614	0.565	0.714	TRUE	8	SD	SD and High GA/TC (80%)
chr14	6837641	6837642	101161492	-	1	JAHKSE010000581.1	28231	28232	28232	0	0	0	0	1	0	0	0	0	HPRC_PLUS	male	3140		EUR	PGP - Ashkenazim Jewish	HG002	HG002 1 JAHKSE010000581.1	166	0.624	0.624	0.526	0.752	TRUE	2	Poisson breaks	Chromosome end or Poisson
chr14	6865875	6865876	101161492	-	1	JAHKSE010000581.1	0	1	28232	0	0	0	0	1	0	0	0	0	HPRC_PLUS	male	3140		EUR	PGP - Ashkenazim Jewish	HG002	HG002 1 JAHKSE010000581.1	167	0.603	0.596	0.469	0.757	TRUE	4	SD	SD and High GA/TC (80%)
chr14	7480917	7480918	101161492	+	1	JAHKSE010000229.1	1768068	1768069	1768071	0	0	0	0	1	0	0	0	0	HPRC_PLUS	male	3140		EUR	PGP - Ashkenazim Jewish	HG002	HG002 1 JAHKSE010000229.1	168	0.53	0.502	0.392	0.636	TRUE	29	SD	SD and High GA/TC (80%)
chr14	7482367	7482368	101161492	+	1	JAHKSE010000519.1	0	1	40320	0	0	0	0	1	0	0	0	0	HPRC_PLUS	male	3140		EUR	PGP - Ashkenazim Jewish	HG002	HG002 1 JAHKSE010000519.1	169	0.53	0.502	0.392	0.636	TRUE	29	SD	SD and High GA/TC (80%)
chr14	7504895	7504896	101161492	-	1	JAHKSE010000015.1	3021099	3021100	3021129	0	0	0	0	1	0	0	0	0	HPRC_PLUS	male	3140		EUR	PGP - Ashkenazim Jewish	HG002	HG002 1 JAHKSE010000015.1	170	0.532	0.502	0.391	0.637	TRUE	30	SD	SD and High GA/TC (80%)
chr14	7520827	7520828	101161492	+	1	JAHKSE010000519.1	40319	40320	40320	0	0	0	0	1	0	0	0	0	HPRC_PLUS	male	3140		EUR	PGP - Ashkenazim Jewish	HG002	HG002 1 JAHKSE010000519.1	171	0.552	0.509	0.529	0.646	TRUE	30	SD	SD and High GA/TC (80%)
chr14	10258511	10258512	101161492	+	1	JAHKSE010000089.1	381761	381762	381762	0	0	0	0	1	0	0	0	0	HPRC_PLUS	male	3140		EUR	PGP - Ashkenazim Jewish	HG002	HG002 1 JAHKSE010000089.1	172	0.493	0.527	0.402	0.619	FALSE	14	Alpha	Satellite
chr14	10471234	10471235	101161492	+	1	JAHKSE010000089.1	5872	5873	381762	0	0	0	0	1	0	0	0	0	HPRC_PLUS	male	3140		EUR	PGP - Ashkenazim Jewish	HG002	HG002 1 JAHKSE010000089.1	173	0.493	0.526	0.402	0.62	FALSE	32	Alpha	Satellite
chr14	11029477	11029478	101161492	-	1	JAHKSE010000489.1	0	1	79094	0	0	0	0	1	0	0	0	0	HPRC_PLUS	male	3140		EUR	PGP - Ashkenazim Jewish	HG002	HG002 1 JAHKSE010000489.1	174	0.496	0.525	0.402	0.618	FALSE	26	Alpha	Satellite
chr14	11750582	11750583	101161492	-	1	JAHKSE010000489.1	79093	79094	79094	0	0	0	0	1	0	0	0	0	HPRC_PLUS	male	3140		EUR	PGP - Ashkenazim Jewish	HG002	HG002 1 JAHKSE010000489.1	175	0.492	0.523	0.401	0.618	FALSE	8	Alpha	Satellite
chr14	11961396	11961397	101161492	-	1	JAHKSE010000015.1	3979	3980	3021129	0	0	0	0	1	0	0	0	0	HPRC_PLUS	male	3140		EUR	PGP - Ashkenazim Jewish	HG002	HG002 1 JAHKSE010000015.1	176	0.492	0.527	0.399	0.618	FALSE	31	Alpha	Satellite
chr14	12345580	12345581	101161492	+	1	JAHKSE010000099.1	13041	13042	2590926	0	0	0	0	1	0	0	0	0	HPRC_PLUS	male	3140		EUR	PGP - Ashkenazim Jewish	HG002	HG002 1 JAHKSE010000099.1	177	0.493	0.523	0.4	0.619	FALSE	23	Alpha	Satellite
chr14	13423771	13423772	101161492	+	1	JAHKSE010000263.1	0	1	555345	0	0	0	0	1	0	0	0	0	HPRC_PLUS	male	3140		EUR	PGP - Ashkenazim Jewish	HG002	HG002 1 JAHKSE010000263.1	178	0.582	0.604	0.531	0.723	FALSE	11	SD	SD and High GA/TC (80%)
chr14	13603858	13603859	101161492	+	1	JAHKSE010000263.1	555344	555345	555345	0	0	0	0	1	0	0	0	0	HPRC_PLUS	male	3140		EUR	PGP - Ashkenazim Jewish	HG002	HG002 1 JAHKSE010000263.1	179	0.59	0.582	0.656	0.728	FALSE	12	SD	SD and High GA/TC (80%)
chr14	13798906	13798907	101161492	+	1	JAHKSE010000240.1	0	1	28776	0	0	0	0	1	0	0	0	0	HPRC_PLUS	male	3140		EUR	PGP - Ashkenazim Jewish	HG002	HG002 1 JAHKSE010000240.1	180	0.797	0.596	0.639	0.703	FALSE	18	SD	SD and High GA/TC (80%)
chr14	13822358	13822359	101161492	+	1	JAHKSE010000062.1	0	1	86543520	0	0	0	0	1	0	0	0	0	HPRC_PLUS	male	3140		EUR	PGP - Ashkenazim Jewish	HG002	HG002 1 JAHKSE010000062.1	181	0.595	0.653	0.598	0.688	FALSE	17	SD	SD and High GA/TC (80%)
chr14	13827669	13827670	101161492	+	1	JAHKSE010000240.1	28775	28776	28776	0	0	0	0	1	0	0	0	0	HPRC_PLUS	male	3140		EUR	PGP - Ashkenazim Jewish	HG002	HG002 1 JAHKSE010000240.1	182	0.602	0.653	0.598	0.674	FALSE	17	SD	SD and High GA/TC (80%)
chr14	13834179	13834180	101161492	-	1	JAHKSE010000326.1	0	1	710597	0	0	0	0	1	0	0	0	0	HPRC_PLUS	male	3140		EUR	PGP - Ashkenazim Jewish	HG002	HG002 1 JAHKSE010000326.1	183	0.602	0.663	0.598	0.674	FALSE	19	SD	SD and High GA/TC (80%)
chr14	13858818	13858819	101161492	-	1	JAHKSE010000326.1	691855	691856	710597	0	0	0	0	1	0	0	0	0	HPRC_PLUS	male	3140		EUR	PGP - Ashkenazim Jewish	HG002	HG002 1 JAHKSE010000326.1	184	0.61	0.572	0.613	0.728	FALSE	19	SD	SD and High GA/TC (80%)
chr14	100225737	100225738	101161492	-	1	JAHKSE010000060.1	639850	639851	639851	0	0	0	0	1	0	0	0	0	HPRC_PLUS	male	3140		EUR	PGP - Ashkenazim Jewish	HG002	HG002 1 JAHKSE010000060.1	185	0.619	0.624	0.569	0.646	FALSE	129	SD	SD and High GA/TC (80%)
chr14	100366773	100366774	101161492	+	1	JAHKSE010000102.1	0	1	62083	0	0	0	0	1	0	0	0	0	HPRC_PLUS	male	3140		EUR	PGP - Ashkenazim Jewish	HG002	HG002 1 JAHKSE010000102.1	186	0.617	0.589	0.523	0.709	FALSE	84	other	other
chr14	100424798	100424799	101161492	+	1	JAHKSE010000102.1	57950	57951	62083	0	0	0	0	1	0	0	0	0	HPRC_PLUS	male	3140		EUR	PGP - Ashkenazim Jewish	HG002	HG002 1 JAHKSE010000102.1	187	0.61	0.595	0.51	0.731	FALSE	70	other	other
chr14	100866100	100866101	101161492	-	1	JAHKSE010000060.1	0	1	639851	0	0	0	0	1	0	0	0	0	HPRC_PLUS	male	3140		EUR	PGP - Ashkenazim Jewish	HG002	HG002 1 JAHKSE010000060.1	188	0.606	0.611	0.512	0.701	FALSE	13	other	other
chr14	101161491	101161492	101161492	+	1	JAHKSE010000062.1	86539816	86539817	86543520	0	0	0	0	1	0	0	0	0	HPRC_PLUS	male	3140		EUR	PGP - Ashkenazim Jewish	HG002	HG002 1 JAHKSE010000062.1	189	0.684783	0.645	0.828	0.694	FALSE	107	Chromosome end	Chromosome end or Poisson
chr15	6067	6068	99753195	+	1	JAHKSE010000486.1	5896	5897	51066	0	0	0	0	1	0	0	0	0	HPRC_PLUS	male	3140		EUR	PGP - Ashkenazim Jewish	HG002	HG002 1 JAHKSE010000486.1	190	0.654	0.71	0.802	0.659	TRUE	129	Chromosome end	Chromosome end or Poisson
chr15	6067	6068	99753195	+	1	JAHKSE010000121.1	11240	11241	2426915	0	0	0	0	1	0	0	0	0	HPRC_PLUS	male	3140		EUR	PGP - Ashkenazim Jewish	HG002	HG002 1 JAHKSE010000121.1	191	0.654	0.71	0.802	0.659	TRUE	129	Chromosome end	Chromosome end or Poisson
chr15	51242	51243	99753195	+	1	JAHKSE010000486.1	51065	51066	51066	0	0	0	0	1	0	0	0	0	HPRC_PLUS	male	3140		EUR	PGP - Ashkenazim Jewish	HG002	HG002 1 JAHKSE010000486.1	192	0.626	0.595	0.63	0.746	TRUE	142	Chromosome end	Chromosome end or Poisson
chr15	1145080	1145081	99753195	+	1	JAHKSE010000377.1	0	1	27022	0	0	0	0	1	0	0	0	0	HPRC_PLUS	male	3140		EUR	PGP - Ashkenazim Jewish	HG002	HG002 1 JAHKSE010000377.1	193	0.759	0.276	0.43	0.601	TRUE	9	SD	SD and High GA/TC (80%)
chr15	1171354	1171355	99753195	+	1	JAHKSE010000377.1	27021	27022	27022	0	0	0	0	1	0	0	0	0	HPRC_PLUS	male	3140		EUR	PGP - Ashkenazim Jewish	HG002	HG002 1 JAHKSE010000377.1	194	0.755	0.271	0.428	0.596	TRUE	9	SD	SD and High GA/TC (80%)
chr15	1861084	1861085	99753195	-	1	JAHKSE010000541.1	56042	56043	56043	0	0	0	0	1	0	0	0	0	HPRC_PLUS	male	3140		EUR	PGP - Ashkenazim Jewish	HG002	HG002 1 JAHKSE010000541.1	195	0.603	0.609	0.693	0.71	TRUE	30	SD	SD and High GA/TC (80%)
chr15	1916631	1916632	99753195	-	1	JAHKSE010000541.1	0	1	56043	0	0	0	0	1	0	0	0	0	HPRC_PLUS	male	3140		EUR	PGP - Ashkenazim Jewish	HG002	HG002 1 JAHKSE010000541.1	196	0.652	0.553	0.58	0.616	TRUE	31	SD	SD and High GA/TC (80%)
chr15	2424216	2424217	99753195	+	1	JAHKSE010000039.1	2787196	2787197	2787197	0	0	0	0	1	0	0	0	0	HPRC_PLUS	male	3140		EUR	PGP - Ashkenazim Jewish	HG002	HG002 1 JAHKSE010000039.1	197	0.568	0.632	0.532	0.732	TRUE	68	SD	SD and High GA/TC (80%)
chr15	2440014	2440015	99753195	+	1	JAHKSE010000121.1	2426914	2426915	2426915	0	0	0	0	1	0	0	0	0	HPRC_PLUS	male	3140		EUR	PGP - Ashkenazim Jewish	HG002	HG002 1 JAHKSE010000121.1	198	0.586	0.616	0.587	0.732	TRUE	82	SD	SD and High GA/TC (80%)
chr15	2490564	2490565	99753195	-	1	JAHKSE010000131.1	0	1	3212174	0	0	0	0	1	0	0	0	0	HPRC_PLUS	male	3140		EUR	PGP - Ashkenazim Jewish	HG002	HG002 1 JAHKSE010000131.1	199	0.638	0.74	0.569	0.732	TRUE	109	SD	SD and High GA/TC (80%)
chr15	3969001	3969002	99753195	+	1	JAHKSE010000211.1	0	1	83402	0	0	0	0	1	0	0	0	0	HPRC_PLUS	male	3140		EUR	PGP - Ashkenazim Jewish	HG002	HG002 1 JAHKSE010000211.1	200	0.599	0.882	0.604	0.631	TRUE	619	SD and High GA/TC (80%)	SD and High GA/TC (80%)
chr15	3978592	3978593	99753195	+	1	JAHKSE010000242.1	0	1	78360	0	0	0	0	1	0	0	0	0	HPRC_PLUS	male	3140		EUR	PGP - Ashkenazim Jewish	HG002	HG002 1 JAHKSE010000242.1	201	0.599	0.846	0.843	0.631	TRUE	669	SD and High GA/TC (80%)	SD and High GA/TC (80%)
chr15	3994781	3994782	99753195	-	1	JAHKSE010000181.1	51738	51739	52093	0	0	0	0	1	0	0	0	0	HPRC_PLUS	male	3140		EUR	PGP - Ashkenazim Jewish	HG002	HG002 1 JAHKSE010000181.1	202	0.559	0.882	0.843	0.539	TRUE	764	SD and High GA/TC (80%)	SD and High GA/TC (80%)
chr15	4013522	4013523	99753195	+	1	JAHKSE010000271.1	0	1	59424	0	0	0	0	1	0	0	0	0	HPRC_PLUS	male	3140		EUR	PGP - Ashkenazim Jewish	HG002	HG002 1 JAHKSE010000271.1	203	0.597	0.882	0.607	0.633	TRUE	895	SD and High GA/TC (80%)	SD and High GA/TC (80%)
chr15	4013720	4013721	99753195	-	1	JAHKSE010000470.1	47424	47425	47425	0	0	0	0	1	0	0	0	0	HPRC_PLUS	male	3140		EUR	PGP - Ashkenazim Jewish	HG002	HG002 1 JAHKSE010000470.1	204	0.597	0.882	0.607	0.633	TRUE	895	SD and High GA/TC (80%)	SD and High GA/TC (80%)
chr15	4023294	4023295	99753195	-	1	JAHKSE010000033.1	77677	77678	77678	0	0	0	0	1	0	0	0	0	HPRC_PLUS	male	3140		EUR	PGP - Ashkenazim Jewish	HG002	HG002 1 JAHKSE010000033.1	205	0.597	0.848	0.841	0.633	TRUE	941	SD and High GA/TC (80%)	SD and High GA/TC (80%)
chr15	4043421	4043422	99753195	+	1	JAHKSE010000335.1	0	1	63299	0	0	0	0	1	0	0	0	0	HPRC_PLUS	male	3140		EUR	PGP - Ashkenazim Jewish	HG002	HG002 1 JAHKSE010000335.1	206	0.554	0.884	0.836	0.544	TRUE	1053	SD and High GA/TC (80%)	SD and High GA/TC (80%)
chr15	4044961	4044962	99753195	-	1	JAHKSE010000181.1	7	8	52093	0	0	0	0	1	0	0	0	0	HPRC_PLUS	male	3140		EUR	PGP - Ashkenazim Jewish	HG002	HG002 1 JAHKSE010000181.1	207	0.554	0.884	0.812	0.544	TRUE	1066	SD and High GA/TC (80%)	SD and High GA/TC (80%)
chr15	4048495	4048496	99753195	-	1	JAHKSE010000409.1	50177	50178	50178	0	0	0	0	1	0	0	0	0	HPRC_PLUS	male	3140		EUR	PGP - Ashkenazim Jewish	HG002	HG002 1 JAHKSE010000409.1	208	0.535	0.884	0.78	0.544	TRUE	1091	SD and High GA/TC (80%)	SD and High GA/TC (80%)
chr15	4053123	4053124	99753195	+	1	JAHKSE010000211.1	83394	83395	83402	0	0	0	0	1	0	0	0	0	HPRC_PLUS	male	3140		EUR	PGP - Ashkenazim Jewish	HG002	HG002 1 JAHKSE010000211.1	209	0.532	0.884	0.607	0.627	TRUE	1116	SD and High GA/TC (80%)	SD and High GA/TC (80%)
chr15	4059541	4059542	99753195	+	1	JAHKSE010000242.1	78359	78360	78360	0	0	0	0	1	0	0	0	0	HPRC_PLUS	male	3140		EUR	PGP - Ashkenazim Jewish	HG002	HG002 1 JAHKSE010000242.1	210	0.586	0.884	0.607	0.627	TRUE	1155	SD and High GA/TC (80%)	SD and High GA/TC (80%)
chr15	4061092	4061093	99753195	-	1	JAHKSE010000470.1	0	1	47425	0	0	0	0	1	0	0	0	0	HPRC_PLUS	male	3140		EUR	PGP - Ashkenazim Jewish	HG002	HG002 1 JAHKSE010000470.1	211	0.586	0.883	0.767	0.627	TRUE	1158	SD and High GA/TC (80%)	SD and High GA/TC (80%)
chr15	4069356	4069357	99753195	-	1	JAHKSE010000515.1	42460	42461	42461	0	0	0	0	1	0	0	0	0	HPRC_PLUS	male	3140		EUR	PGP - Ashkenazim Jewish	HG002	HG002 1 JAHKSE010000515.1	212	0.586	0.816	0.84	0.627	TRUE	1163	SD and High GA/TC (80%)	SD and High GA/TC (80%)
chr15	4072191	4072192	99753195	+	1	JAHKSE010000271.1	59423	59424	59424	0	0	0	0	1	0	0	0	0	HPRC_PLUS	male	3140		EUR	PGP - Ashkenazim Jewish	HG002	HG002 1 JAHKSE010000271.1	213	0.586	0.816	0.84	0.59	TRUE	1159	SD and High GA/TC (80%)	SD and High GA/TC (80%)
chr15	4077311	4077312	99753195	+	1	JAHKSE010000477.1	0	1	132268	0	0	0	0	1	0	0	0	0	HPRC_PLUS	male	3140		EUR	PGP - Ashkenazim Jewish	HG002	HG002 1 JAHKSE010000477.1	214	0.586	0.816	0.84	0.588	TRUE	1167	SD and High GA/TC (80%)	SD and High GA/TC (80%)
chr15	4079338	4079339	99753195	+	1	JAHKSE010000557.1	0	1	52319	0	0	0	0	1	0	0	0	0	HPRC_PLUS	male	3140		EUR	PGP - Ashkenazim Jewish	HG002	HG002 1 JAHKSE010000557.1	215	0.556	0.777	0.84	0.583	TRUE	1170	SD	SD and High GA/TC (80%)
chr15	4084639	4084640	99753195	+	1	JAHKSE010000350.1	1575	1576	132412	0	0	0	0	1	0	0	0	0	HPRC_PLUS	male	3140		EUR	PGP - Ashkenazim Jewish	HG002	HG002 1 JAHKSE010000350.1	216	0.556	0.881	0.837	0.538	TRUE	1193	SD and High GA/TC (80%)	SD and High GA/TC (80%)
chr15	4097078	4097079	99753195	-	1	JAHKSE010000409.1	0	1	50178	0	0	0	0	1	0	0	0	0	HPRC_PLUS	male	3140		EUR	PGP - Ashkenazim Jewish	HG002	HG002 1 JAHKSE010000409.1	217	0.537	0.882	0.606	0.631	TRUE	1264	SD and High GA/TC (80%)	SD and High GA/TC (80%)
chr15	4099429	4099430	99753195	-	1	JAHKSE010000033.1	0	1	77678	0	0	0	0	1	0	0	0	0	HPRC_PLUS	male	3140		EUR	PGP - Ashkenazim Jewish	HG002	HG002 1 JAHKSE010000033.1	218	0.537	0.882	0.606	0.631	TRUE	1260	SD and High GA/TC (80%)	SD and High GA/TC (80%)
chr15	4106270	4106271	99753195	+	1	JAHKSE010000394.1	0	1	96801	0	0	0	0	1	0	0	0	0	HPRC_PLUS	male	3140		EUR	PGP - Ashkenazim Jewish	HG002	HG002 1 JAHKSE010000394.1	219	0.591	0.882	0.776	0.631	TRUE	1275	SD and High GA/TC (80%)	SD and High GA/TC (80%)
chr15	4106954	4106955	99753195	+	1	JAHKSE010000335.1	63298	63299	63299	0	0	0	0	1	0	0	0	0	HPRC_PLUS	male	3140		EUR	PGP - Ashkenazim Jewish	HG002	HG002 1 JAHKSE010000335.1	220	0.591	0.882	0.776	0.631	TRUE	1274	SD and High GA/TC (80%)	SD and High GA/TC (80%)
chr15	4112787	4112788	99753195	-	1	JAHKSE010000515.1	0	1	42461	0	0	0	0	1	0	0	0	0	HPRC_PLUS	male	3140		EUR	PGP - Ashkenazim Jewish	HG002	HG002 1 JAHKSE010000515.1	221	0.591	0.846	0.842	0.631	TRUE	1279	SD and High GA/TC (80%)	SD and High GA/TC (80%)
chr15	4131726	4131727	99753195	+	1	JAHKSE010000557.1	52318	52319	52319	0	0	0	0	1	0	0	0	0	HPRC_PLUS	male	3140		EUR	PGP - Ashkenazim Jewish	HG002	HG002 1 JAHKSE010000557.1	222	0.556	0.881	0.837	0.539	TRUE	1305	SD and High GA/TC (80%)	SD and High GA/TC (80%)
chr15	4137311	4137312	99753195	-	1	JAHKSE010000212.1	94280	94281	94281	0	0	0	0	1	0	0	0	0	HPRC_PLUS	male	3140		EUR	PGP - Ashkenazim Jewish	HG002	HG002 1 JAHKSE010000212.1	223	0.536	0.883	0.798	0.543	TRUE	1343	SD and High GA/TC (80%)	SD and High GA/TC (80%)
chr15	4147221	4147222	99753195	+	1	JAHKSE010000143.1	0	1	362229	0	0	0	0	1	0	0	0	0	HPRC_PLUS	male	3140		EUR	PGP - Ashkenazim Jewish	HG002	HG002 1 JAHKSE010000143.1	224	0.597	0.883	0.604	0.634	TRUE	1357	SD and High GA/TC (80%)	SD and High GA/TC (80%)
chr15	4148720	4148721	99753195	+	1	JAHKSE010000532.1	0	1	50356	0	0	0	0	1	0	0	0	0	HPRC_PLUS	male	3140		EUR	PGP - Ashkenazim Jewish	HG002	HG002 1 JAHKSE010000532.1	225	0.597	0.883	0.604	0.634	TRUE	1362	SD and High GA/TC (80%)	SD and High GA/TC (80%)
chr15	4151554	4151555	99753195	-	1	JAHKSE010000336.1	125168	125169	125172	0	0	0	0	1	0	0	0	0	HPRC_PLUS	male	3140		EUR	PGP - Ashkenazim Jewish	HG002	HG002 1 JAHKSE010000336.1	226	0.597	0.883	0.774	0.634	TRUE	1370	SD and High GA/TC (80%)	SD and High GA/TC (80%)
chr15	4181328	4181329	99753195	-	1	JAHKSE010000328.1	44828	44829	44829	0	0	0	0	1	0	0	0	0	HPRC_PLUS	male	3140		EUR	PGP - Ashkenazim Jewish	HG002	HG002 1 JAHKSE010000328.1	227	0.551	0.884	0.795	0.544	TRUE	1367	SD and High GA/TC (80%)	SD and High GA/TC (80%)
chr15	4184246	4184247	99753195	+	1	JAHKSE010000248.1	0	1	88231	0	0	0	0	1	0	0	0	0	HPRC_PLUS	male	3140		EUR	PGP - Ashkenazim Jewish	HG002	HG002 1 JAHKSE010000248.1	228	0.536	0.884	0.782	0.544	TRUE	1377	SD and High GA/TC (80%)	SD and High GA/TC (80%)
chr15	4191301	4191302	99753195	+	1	JAHKSE010000237.1	0	1	87886	0	0	0	0	1	0	0	0	0	HPRC_PLUS	male	3140		EUR	PGP - Ashkenazim Jewish	HG002	HG002 1 JAHKSE010000237.1	229	0.591	0.884	0.609	0.63	TRUE	1383	SD and High GA/TC (80%)	SD and High GA/TC (80%)
chr15	4198623	4198624	99753195	+	1	JAHKSE010000532.1	50355	50356	50356	0	0	0	0	1	0	0	0	0	HPRC_PLUS	male	3140		EUR	PGP - Ashkenazim Jewish	HG002	HG002 1 JAHKSE010000532.1	230	0.591	0.881	0.842	0.63	TRUE	1375	SD and High GA/TC (80%)	SD and High GA/TC (80%)
chr15	4204808	4204809	99753195	+	1	JAHKSE010000394.1	96800	96801	96801	0	0	0	0	1	0	0	0	0	HPRC_PLUS	male	3140		EUR	PGP - Ashkenazim Jewish	HG002	HG002 1 JAHKSE010000394.1	231	0.591	0.81	0.842	0.63	TRUE	1370	SD and High GA/TC (80%)	SD and High GA/TC (80%)
chr15	4209482	4209483	99753195	+	1	JAHKSE010000477.1	132267	132268	132268	0	0	0	0	1	0	0	0	0	HPRC_PLUS	male	3140		EUR	PGP - Ashkenazim Jewish	HG002	HG002 1 JAHKSE010000477.1	232	0.591	0.81	0.842	0.589	TRUE	1358	SD and High GA/TC (80%)	SD and High GA/TC (80%)
chr15	4217115	4217116	99753195	+	1	JAHKSE010000350.1	132411	132412	132412	0	0	0	0	1	0	0	0	0	HPRC_PLUS	male	3140		EUR	PGP - Ashkenazim Jewish	HG002	HG002 1 JAHKSE010000350.1	233	0.56	0.776	0.842	0.536	TRUE	1364	SD	SD and High GA/TC (80%)
chr15	4226256	4226257	99753195	-	1	JAHKSE010000328.1	0	1	44829	0	0	0	0	1	0	0	0	0	HPRC_PLUS	male	3140		EUR	PGP - Ashkenazim Jewish	HG002	HG002 1 JAHKSE010000328.1	234	0.554	0.883	0.797	0.541	TRUE	1382	SD and High GA/TC (80%)	SD and High GA/TC (80%)
chr15	4232387	4232388	99753195	-	1	JAHKSE010000212.1	0	1	94281	0	0	0	0	1	0	0	0	0	HPRC_PLUS	male	3140		EUR	PGP - Ashkenazim Jewish	HG002	HG002 1 JAHKSE010000212.1	235	0.537	0.883	0.608	0.632	TRUE	1398	SD and High GA/TC (80%)	SD and High GA/TC (80%)
chr15	4240190	4240191	99753195	-	1	JAHKSE010000135.1	47662	47663	47663	0	0	0	0	1	0	0	0	0	HPRC_PLUS	male	3140		EUR	PGP - Ashkenazim Jewish	HG002	HG002 1 JAHKSE010000135.1	236	0.588	0.883	0.759	0.632	TRUE	1402	SD and High GA/TC (80%)	SD and High GA/TC (80%)
chr15	4271934	4271935	99753195	+	1	JAHKSE010000248.1	88230	88231	88231	0	0	0	0	1	0	0	0	0	HPRC_PLUS	male	3140		EUR	PGP - Ashkenazim Jewish	HG002	HG002 1 JAHKSE010000248.1	237	0.538	0.882	0.794	0.538	TRUE	1379	SD and High GA/TC (80%)	SD and High GA/TC (80%)
chr15	4273581	4273582	99753195	-	1	JAHKSE010000336.1	0	1	125172	0	0	0	0	1	0	0	0	0	HPRC_PLUS	male	3140		EUR	PGP - Ashkenazim Jewish	HG002	HG002 1 JAHKSE010000336.1	238	0.537	0.882	0.783	0.538	TRUE	1386	SD and High GA/TC (80%)	SD and High GA/TC (80%)
chr15	4279194	4279195	99753195	+	1	JAHKSE010000237.1	87885	87886	87886	0	0	0	0	1	0	0	0	0	HPRC_PLUS	male	3140		EUR	PGP - Ashkenazim Jewish	HG002	HG002 1 JAHKSE010000237.1	239	0.537	0.882	0.605	0.631	TRUE	1397	SD and High GA/TC (80%)	SD and High GA/TC (80%)
chr15	4287069	4287070	99753195	-	1	JAHKSE010000135.1	4	5	47663	0	0	0	0	1	0	0	0	0	HPRC_PLUS	male	3140		EUR	PGP - Ashkenazim Jewish	HG002	HG002 1 JAHKSE010000135.1	240	0.599	0.882	0.774	0.631	TRUE	1372	SD and High GA/TC (80%)	SD and High GA/TC (80%)
chr15	4291146	4291147	99753195	+	1	JAHKSE010000235.1	0	1	31650	0	0	0	0	1	0	0	0	0	HPRC_PLUS	male	3140		EUR	PGP - Ashkenazim Jewish	HG002	HG002 1 JAHKSE010000235.1	241	0.599	0.848	0.842	0.631	TRUE	1362	SD and High GA/TC (80%)	SD and High GA/TC (80%)
chr15	4298601	4298602	99753195	+	1	JAHKSE010000259.1	0	1	83237	0	0	0	0	1	0	0	0	0	HPRC_PLUS	male	3140		EUR	PGP - Ashkenazim Jewish	HG002	HG002 1 JAHKSE010000259.1	242	0.599	0.815	0.842	0.586	TRUE	1329	SD and High GA/TC (80%)	SD and High GA/TC (80%)
chr15	4306744	4306745	99753195	-	1	JAHKSE010000198.1	31382	31383	31383	0	0	0	0	1	0	0	0	0	HPRC_PLUS	male	3140		EUR	PGP - Ashkenazim Jewish	HG002	HG002 1 JAHKSE010000198.1	243	0.557	0.779	0.842	0.535	TRUE	1346	SD	SD and High GA/TC (80%)
chr15	4309377	4309378	99753195	-	1	JAHKSE010000109.1	163535	163536	163536	0	0	0	0	1	0	0	0	0	HPRC_PLUS	male	3140		EUR	PGP - Ashkenazim Jewish	HG002	HG002 1 JAHKSE010000109.1	244	0.557	0.883	0.838	0.541	TRUE	1362	SD and High GA/TC (80%)	SD and High GA/TC (80%)
chr15	4321188	4321189	99753195	+	1	JAHKSE010000235.1	31649	31650	31650	0	0	0	0	1	0	0	0	0	HPRC_PLUS	male	3140		EUR	PGP - Ashkenazim Jewish	HG002	HG002 1 JAHKSE010000235.1	245	0.536	0.883	0.609	0.634	TRUE	1381	SD and High GA/TC (80%)	SD and High GA/TC (80%)
chr15	4339137	4339138	99753195	-	1	JAHKSE010000198.1	0	1	31383	0	0	0	0	1	0	0	0	0	HPRC_PLUS	male	3140		EUR	PGP - Ashkenazim Jewish	HG002	HG002 1 JAHKSE010000198.1	246	0.595	0.81	0.841	0.634	TRUE	1335	SD and High GA/TC (80%)	SD and High GA/TC (80%)
chr15	4383939	4383940	99753195	+	1	JAHKSE010000259.1	83236	83237	83237	0	0	0	0	1	0	0	0	0	HPRC_PLUS	male	3140		EUR	PGP - Ashkenazim Jewish	HG002	HG002 1 JAHKSE010000259.1	247	0.586	0.816	0.84	0.627	TRUE	1333	SD and High GA/TC (80%)	SD and High GA/TC (80%)
chr15	4387652	4387653	99753195	+	1	JAHKSE010000342.1	0	1	45758	0	0	0	0	1	0	0	0	0	HPRC_PLUS	male	3140		EUR	PGP - Ashkenazim Jewish	HG002	HG002 1 JAHKSE010000342.1	248	0.586	0.816	0.84	0.588	TRUE	1323	SD and High GA/TC (80%)	SD and High GA/TC (80%)
chr15	4400616	4400617	99753195	-	1	JAHKSE010000499.1	49498	49499	49499	0	0	0	0	1	0	0	0	0	HPRC_PLUS	male	3140		EUR	PGP - Ashkenazim Jewish	HG002	HG002 1 JAHKSE010000499.1	249	0.556	0.881	0.838	0.538	TRUE	1318	SD and High GA/TC (80%)	SD and High GA/TC (80%)
chr15	4412082	4412083	99753195	+	1	JAHKSE010000213.1	0	1	59622	0	0	0	0	1	0	0	0	0	HPRC_PLUS	male	3140		EUR	PGP - Ashkenazim Jewish	HG002	HG002 1 JAHKSE010000213.1	250	0.536	0.882	0.604	0.631	TRUE	1350	SD and High GA/TC (80%)	SD and High GA/TC (80%)
chr15	4431826	4431827	99753195	+	1	JAHKSE010000342.1	45757	45758	45758	0	0	0	0	1	0	0	0	0	HPRC_PLUS	male	3140		EUR	PGP - Ashkenazim Jewish	HG002	HG002 1 JAHKSE010000342.1	251	0.593	0.815	0.842	0.586	TRUE	1334	SD and High GA/TC (80%)	SD and High GA/TC (80%)
chr15	4450135	4450136	99753195	-	1	JAHKSE010000499.1	0	1	49499	0	0	0	0	1	0	0	0	0	HPRC_PLUS	male	3140		EUR	PGP - Ashkenazim Jewish	HG002	HG002 1 JAHKSE010000499.1	252	0.557	0.883	0.799	0.545	TRUE	1336	SD and High GA/TC (80%)	SD and High GA/TC (80%)
chr15	4460060	4460061	99753195	+	1	JAHKSE010000101.1	0	1	193640	0	0	0	0	1	0	0	0	0	HPRC_PLUS	male	3140		EUR	PGP - Ashkenazim Jewish	HG002	HG002 1 JAHKSE010000101.1	253	0.536	0.883	0.603	0.633	TRUE	1348	SD and High GA/TC (80%)	SD and High GA/TC (80%)
chr15	4466365	4466366	99753195	-	1	JAHKSE010000384.1	42248	42249	42249	0	0	0	0	1	0	0	0	0	HPRC_PLUS	male	3140		EUR	PGP - Ashkenazim Jewish	HG002	HG002 1 JAHKSE010000384.1	254	0.598	0.883	0.775	0.633	TRUE	1349	SD and High GA/TC (80%)	SD and High GA/TC (80%)
chr15	4470981	4470982	99753195	+	1	JAHKSE010000213.1	59621	59622	59622	0	0	0	0	1	0	0	0	0	HPRC_PLUS	male	3140		EUR	PGP - Ashkenazim Jewish	HG002	HG002 1 JAHKSE010000213.1	255	0.598	0.847	0.843	0.633	TRUE	1354	SD and High GA/TC (80%)	SD and High GA/TC (80%)
chr15	4473038	4473039	99753195	-	1	JAHKSE010000109.1	0	1	163536	0	0	0	0	1	0	0	0	0	HPRC_PLUS	male	3140		EUR	PGP - Ashkenazim Jewish	HG002	HG002 1 JAHKSE010000109.1	256	0.598	0.811	0.843	0.633	TRUE	1346	SD and High GA/TC (80%)	SD and High GA/TC (80%)
chr15	4473722	4473723	99753195	+	1	JAHKSE010000588.1	0	1	32769	0	0	0	0	1	0	0	0	0	HPRC_PLUS	male	3140		EUR	PGP - Ashkenazim Jewish	HG002	HG002 1 JAHKSE010000588.1	257	0.598	0.811	0.843	0.633	TRUE	1340	SD and High GA/TC (80%)	SD and High GA/TC (80%)
chr15	4506470	4506471	99753195	+	1	JAHKSE010000588.1	32768	32769	32769	0	0	0	0	1	0	0	0	0	HPRC_PLUS	male	3140		EUR	PGP - Ashkenazim Jewish	HG002	HG002 1 JAHKSE010000588.1	258	0.589	0.884	0.609	0.629	TRUE	1395	SD and High GA/TC (80%)	SD and High GA/TC (80%)
chr15	4508641	4508642	99753195	-	1	JAHKSE010000384.1	0	1	42249	0	0	0	0	1	0	0	0	0	HPRC_PLUS	male	3140		EUR	PGP - Ashkenazim Jewish	HG002	HG002 1 JAHKSE010000384.1	259	0.589	0.884	0.609	0.629	TRUE	1390	SD and High GA/TC (80%)	SD and High GA/TC (80%)
chr15	4510578	4510579	99753195	+	1	JAHKSE010000143.1	362228	362229	362229	0	0	0	0	1	0	0	0	0	HPRC_PLUS	male	3140		EUR	PGP - Ashkenazim Jewish	HG002	HG002 1 JAHKSE010000143.1	260	0.589	0.882	0.775	0.629	TRUE	1395	SD and High GA/TC (80%)	SD and High GA/TC (80%)
chr15	4516116	4516117	99753195	+	1	JAHKSE010000325.1	0	1	108034	0	0	0	0	1	0	0	0	0	HPRC_PLUS	male	3140		EUR	PGP - Ashkenazim Jewish	HG002	HG002 1 JAHKSE010000325.1	261	0.589	0.847	0.842	0.629	TRUE	1409	SD and High GA/TC (80%)	SD and High GA/TC (80%)
chr15	4535576	4535577	99753195	-	1	JAHKSE010000214.1	1304203	1304204	1304204	0	0	0	0	1	0	0	0	0	HPRC_PLUS	male	3140		EUR	PGP - Ashkenazim Jewish	HG002	HG002 1 JAHKSE010000214.1	262	0.559	0.882	0.837	0.539	TRUE	1474	SD and High GA/TC (80%)	SD and High GA/TC (80%)
chr15	4543042	4543043	99753195	+	1	JAHKSE010000505.1	0	1	134624	0	0	0	0	1	0	0	0	0	HPRC_PLUS	male	3140		EUR	PGP - Ashkenazim Jewish	HG002	HG002 1 JAHKSE010000505.1	263	0.537	0.883	0.783	0.541	TRUE	1483	SD and High GA/TC (80%)	SD and High GA/TC (80%)
chr15	4548158	4548159	99753195	+	1	JAHKSE010000035.1	0	1	113916	0	0	0	0	1	0	0	0	0	HPRC_PLUS	male	3140		EUR	PGP - Ashkenazim Jewish	HG002	HG002 1 JAHKSE010000035.1	264	0.537	0.883	0.607	0.633	TRUE	1470	SD and High GA/TC (80%)	SD and High GA/TC (80%)
chr15	4557753	4557754	99753195	-	1	JAHKSE010000577.1	48805	48806	48806	0	0	0	0	1	0	0	0	0	HPRC_PLUS	male	3140		EUR	PGP - Ashkenazim Jewish	HG002	HG002 1 JAHKSE010000577.1	265	0.588	0.883	0.842	0.633	TRUE	1432	SD and High GA/TC (80%)	SD and High GA/TC (80%)
chr15	4559922	4559923	99753195	-	1	JAHKSE010000275.1	102932	102933	102933	0	0	0	0	1	0	0	0	0	HPRC_PLUS	male	3140		EUR	PGP - Ashkenazim Jewish	HG002	HG002 1 JAHKSE010000275.1	266	0.588	0.846	0.842	0.633	TRUE	1418	SD and High GA/TC (80%)	SD and High GA/TC (80%)
chr15	4576870	4576871	99753195	-	1	JAHKSE010000140.1	89557	89558	89558	0	0	0	0	1	0	0	0	0	HPRC_PLUS	male	3140		EUR	PGP - Ashkenazim Jewish	HG002	HG002 1 JAHKSE010000140.1	267	0.558	0.779	0.842	0.535	TRUE	1568	SD	SD and High GA/TC (80%)
chr15	4577429	4577430	99753195	-	1	JAHKSE010000133.1	95612	95613	95613	0	0	0	0	1	0	0	0	0	HPRC_PLUS	male	3140		EUR	PGP - Ashkenazim Jewish	HG002	HG002 1 JAHKSE010000133.1	268	0.558	0.872	0.842	0.535	TRUE	1568	SD and High GA/TC (80%)	SD and High GA/TC (80%)
chr15	4604970	4604971	99753195	-	1	JAHKSE010000577.1	0	1	48806	0	0	0	0	1	0	0	0	0	HPRC_PLUS	male	3140		EUR	PGP - Ashkenazim Jewish	HG002	HG002 1 JAHKSE010000577.1	269	0.598	0.848	0.843	0.632	TRUE	1457	SD and High GA/TC (80%)	SD and High GA/TC (80%)
chr15	4605729	4605730	99753195	+	1	JAHKSE010000427.1	0	1	56544	0	0	0	0	1	0	0	0	0	HPRC_PLUS	male	3140		EUR	PGP - Ashkenazim Jewish	HG002	HG002 1 JAHKSE010000427.1	270	0.598	0.848	0.843	0.632	TRUE	1452	SD and High GA/TC (80%)	SD and High GA/TC (80%)
chr15	4616695	4616696	99753195	+	1	JAHKSE010000473.1	0	1	55158	0	0	0	0	1	0	0	0	0	HPRC_PLUS	male	3140		EUR	PGP - Ashkenazim Jewish	HG002	HG002 1 JAHKSE010000473.1	271	0.557	0.813	0.843	0.585	TRUE	1369	SD and High GA/TC (80%)	SD and High GA/TC (80%)
chr15	4617395	4617396	99753195	-	1	JAHKSE010000418.1	50699	50700	50700	0	0	0	0	1	0	0	0	0	HPRC_PLUS	male	3140		EUR	PGP - Ashkenazim Jewish	HG002	HG002 1 JAHKSE010000418.1	272	0.557	0.813	0.843	0.585	TRUE	1365	SD and High GA/TC (80%)	SD and High GA/TC (80%)
chr15	4626434	4626435	99753195	+	1	JAHKSE010000325.1	108031	108032	108034	0	0	0	0	1	0	0	0	0	HPRC_PLUS	male	3140		EUR	PGP - Ashkenazim Jewish	HG002	HG002 1 JAHKSE010000325.1	273	0.557	0.883	0.835	0.542	TRUE	1300	SD and High GA/TC (80%)	SD and High GA/TC (80%)
chr15	4650596	4650597	99753195	+	1	JAHKSE010000101.1	193639	193640	193640	0	0	0	0	1	0	0	0	0	HPRC_PLUS	male	3140		EUR	PGP - Ashkenazim Jewish	HG002	HG002 1 JAHKSE010000101.1	274	0.594	0.846	0.841	0.632	TRUE	1156	SD and High GA/TC (80%)	SD and High GA/TC (80%)
chr15	4661665	4661666	99753195	+	1	JAHKSE010000427.1	56543	56544	56544	0	0	0	0	1	0	0	0	0	HPRC_PLUS	male	3140		EUR	PGP - Ashkenazim Jewish	HG002	HG002 1 JAHKSE010000427.1	275	0.558	0.809	0.841	0.587	TRUE	1075	SD and High GA/TC (80%)	SD and High GA/TC (80%)
chr15	4661787	4661788	99753195	-	1	JAHKSE010000275.1	0	1	102933	0	0	0	0	1	0	0	0	0	HPRC_PLUS	male	3140		EUR	PGP - Ashkenazim Jewish	HG002	HG002 1 JAHKSE010000275.1	276	0.558	0.809	0.841	0.587	TRUE	1074	SD and High GA/TC (80%)	SD and High GA/TC (80%)
chr15	4663666	4663667	99753195	+	1	JAHKSE010000035.1	113915	113916	113916	0	0	0	0	1	0	0	0	0	HPRC_PLUS	male	3140		EUR	PGP - Ashkenazim Jewish	HG002	HG002 1 JAHKSE010000035.1	277	0.558	0.779	0.841	0.575	TRUE	1048	SD	SD and High GA/TC (80%)
chr15	4666494	4666495	99753195	-	1	JAHKSE010000140.1	0	1	89558	0	0	0	0	1	0	0	0	0	HPRC_PLUS	male	3140		EUR	PGP - Ashkenazim Jewish	HG002	HG002 1 JAHKSE010000140.1	278	0.558	0.779	0.841	0.525	TRUE	1032	SD	SD and High GA/TC (80%)
chr15	4668120	4668121	99753195	-	1	JAHKSE010000418.1	0	1	50700	0	0	0	0	1	0	0	0	0	HPRC_PLUS	male	3140		EUR	PGP - Ashkenazim Jewish	HG002	HG002 1 JAHKSE010000418.1	279	0.558	0.885	0.841	0.543	TRUE	1021	SD and High GA/TC (80%)	SD and High GA/TC (80%)
chr15	4668632	4668633	99753195	-	1	JAHKSE010000379.1	28040	28041	28041	0	0	0	0	1	0	0	0	0	HPRC_PLUS	male	3140		EUR	PGP - Ashkenazim Jewish	HG002	HG002 1 JAHKSE010000379.1	280	0.558	0.885	0.841	0.543	TRUE	1017	SD and High GA/TC (80%)	SD and High GA/TC (80%)
chr15	4670088	4670089	99753195	+	1	JAHKSE010000560.1	0	1	29403	0	0	0	0	1	0	0	0	0	HPRC_PLUS	male	3140		EUR	PGP - Ashkenazim Jewish	HG002	HG002 1 JAHKSE010000560.1	281	0.558	0.885	0.838	0.543	TRUE	1008	SD and High GA/TC (80%)	SD and High GA/TC (80%)
chr15	4671401	4671402	99753195	-	1	JAHKSE010000133.1	0	1	95613	0	0	0	0	1	0	0	0	0	HPRC_PLUS	male	3140		EUR	PGP - Ashkenazim Jewish	HG002	HG002 1 JAHKSE010000133.1	282	0.558	0.885	0.838	0.543	TRUE	994	SD and High GA/TC (80%)	SD and High GA/TC (80%)
chr15	4673653	4673654	99753195	+	1	JAHKSE010000473.1	55157	55158	55158	0	0	0	0	1	0	0	0	0	HPRC_PLUS	male	3140		EUR	PGP - Ashkenazim Jewish	HG002	HG002 1 JAHKSE010000473.1	283	0.558	0.885	0.814	0.543	TRUE	985	SD and High GA/TC (80%)	SD and High GA/TC (80%)
chr15	4680388	4680389	99753195	+	1	JAHKSE010000505.1	134623	134624	134624	0	0	0	0	1	0	0	0	0	HPRC_PLUS	male	3140		EUR	PGP - Ashkenazim Jewish	HG002	HG002 1 JAHKSE010000505.1	284	0.534	0.885	0.634	0.632	TRUE	948	SD and High GA/TC (80%)	SD and High GA/TC (80%)
chr15	4696603	4696604	99753195	-	1	JAHKSE010000379.1	0	1	28041	0	0	0	0	1	0	0	0	0	HPRC_PLUS	male	3140		EUR	PGP - Ashkenazim Jewish	HG002	HG002 1 JAHKSE010000379.1	285	0.594	0.851	0.84	0.632	TRUE	806	SD and High GA/TC (80%)	SD and High GA/TC (80%)
chr15	4699386	4699387	99753195	+	1	JAHKSE010000560.1	29402	29403	29403	0	0	0	0	1	0	0	0	0	HPRC_PLUS	male	3140		EUR	PGP - Ashkenazim Jewish	HG002	HG002 1 JAHKSE010000560.1	286	0.594	0.801	0.84	0.632	TRUE	788	SD and High GA/TC (80%)	SD and High GA/TC (80%)
chr15	6161494	6161495	99753195	+	1	JAHKSE010000437.1	0	1	96843	0	0	0	0	1	0	0	0	0	HPRC_PLUS	male	3140		EUR	PGP - Ashkenazim Jewish	HG002	HG002 1 JAHKSE010000437.1	287	0.319	0.72	0.407	0.62	TRUE	10	Satellite	Satellite
chr15	6264494	6264495	99753195	+	1	JAHKSE010000437.1	96842	96843	96843	0	0	0	0	1	0	0	0	0	HPRC_PLUS	male	3140		EUR	PGP - Ashkenazim Jewish	HG002	HG002 1 JAHKSE010000437.1	288	0.321	0.719	0.408	0.621	TRUE	13	10% Low Complexity	Satellite
chr15	16961103	16961104	99753195	-	1	JAHKSE010000018.1	57200636	57200637	57200637	0	0	0	0	1	0	0	0	0	HPRC_PLUS	male	3140		EUR	PGP - Ashkenazim Jewish	HG002	HG002 1 JAHKSE010000018.1	289	0.505	0.518	0.394	0.631	FALSE	88	Alpha	Satellite
chr15	17151338	17151339	99753195	-	1	JAHKSE010000073.1	0	1	8326725	100	100	100	1	0	0	0	0	0	HPRC_PLUS	male	3140		EUR	PGP - Ashkenazim Jewish	HG002	HG002 1 JAHKSE010000073.1	290	0.506	0.519	0.394	0.633	FALSE	107	Alpha	Satellite
chr15	26094869	26094870	99753195	-	1	JAHKSE010000441.1	56135	56136	56136	0	0	0	0	1	0	0	0	0	HPRC_PLUS	male	3140		EUR	PGP - Ashkenazim Jewish	HG002	HG002 1 JAHKSE010000441.1	291	0.594	0.856	0.609	0.673	FALSE	15	SD and High GA/TC (80%)	SD and High GA/TC (80%)
chr15	26150997	26150998	99753195	-	1	JAHKSE010000441.1	0	1	56136	0	0	0	0	1	0	0	0	0	HPRC_PLUS	male	3140		EUR	PGP - Ashkenazim Jewish	HG002	HG002 1 JAHKSE010000441.1	292	0.569	0.634	0.656	0.74	FALSE	17	SD	SD and High GA/TC (80%)
chr15	74900939	74900940	99753195	-	1	JAHKSE010000097.1	24806535	24806536	24808844	0	0	0	0	1	0	0	0	0	HPRC_PLUS	male	3140		EUR	PGP - Ashkenazim Jewish	HG002	HG002 1 JAHKSE010000097.1	293	1	0.594	0.727	0.692	FALSE	140	High GA/TC (80%)	High GA/TC (80%)
chr15	74901570	74901571	99753195	-	1	JAHKSE010000018.1	0	1	57200637	0	0	0	0	1	0	0	0	0	HPRC_PLUS	male	3140		EUR	PGP - Ashkenazim Jewish	HG002	HG002 1 JAHKSE010000018.1	294	1	0.594	0.727	0.692	FALSE	140	High GA/TC (80%)	High GA/TC (80%)
chr15	81639491	81639492	99753195	-	1	JAHKSE010000411.1	30624	30625	30625	0	0	0	0	1	0	0	0	0	HPRC_PLUS	male	3140		EUR	PGP - Ashkenazim Jewish	HG002	HG002 1 JAHKSE010000411.1	295	0.615	0.631	0.509	0.725	FALSE	2	Poisson breaks	Chromosome end or Poisson
chr15	81670069	81670070	99753195	-	1	JAHKSE010000411.1	39	40	30625	0	0	0	0	1	0	0	0	0	HPRC_PLUS	male	3140		EUR	PGP - Ashkenazim Jewish	HG002	HG002 1 JAHKSE010000411.1	296	0.615	0.55	0.507	0.704	FALSE	2	Poisson breaks	Chromosome end or Poisson
chr15	99753194	99753195	99753195	-	1	JAHKSE010000097.1	4542	4543	24808844	0	0	0	0	1	0	0	0	0	HPRC_PLUS	male	3140		EUR	PGP - Ashkenazim Jewish	HG002	HG002 1 JAHKSE010000097.1	297	0.674	0.572	0.746	0.515789	FALSE	114	Chromosome end	Chromosome end or Poisson
chr16	14916901	14916902	96330374	-	1	JAHKSE010000547.1	32125	32126	32126	0	0	0	0	1	0	0	0	0	HPRC_PLUS	male	3140		EUR	PGP - Ashkenazim Jewish	HG002	HG002 1 JAHKSE010000547.1	298	0.613	0.979	0.789	0.572	FALSE	80	SD and High GA/TC (80%)	SD and High GA/TC (80%)
chr16	14948970	14948971	96330374	-	1	JAHKSE010000547.1	0	1	32126	0	0	0	0	1	0	0	0	0	HPRC_PLUS	male	3140		EUR	PGP - Ashkenazim Jewish	HG002	HG002 1 JAHKSE010000547.1	299	0.57	0.59	0.575	0.642	FALSE	82	SD	SD and High GA/TC (80%)
chr16	22387245	22387246	96330374	+	1	JAHKSE010000007.1	22833055	22833056	22839271	0	0	0	0	1	0	0	0	0	HPRC_PLUS	male	3140		EUR	PGP - Ashkenazim Jewish	HG002	HG002 1 JAHKSE010000007.1	300	0.581	0.6	0.597	0.627	FALSE	35	SD	SD and High GA/TC (80%)
chr16	22633819	22633820	96330374	+	1	JAHKSE010000252.1	8495	8496	333924	0	0	0	0	1	0	0	0	0	HPRC_PLUS	male	3140		EUR	PGP - Ashkenazim Jewish	HG002	HG002 1 JAHKSE010000252.1	301	0.558	0.632	0.519	0.682	FALSE	7	SD	SD and High GA/TC (80%)
chr16	22734204	22734205	96330374	-	1	JAHKSE010000086.1	11900520	11900521	11900521	0	0	0	0	1	0	0	0	0	HPRC_PLUS	male	3140		EUR	PGP - Ashkenazim Jewish	HG002	HG002 1 JAHKSE010000086.1	302	0.585	0.593	0.521	0.69	FALSE	11	SD	SD and High GA/TC (80%)
chr16	22959344	22959345	96330374	+	1	JAHKSE010000252.1	333923	333924	333924	0	0	0	0	1	0	0	0	0	HPRC_PLUS	male	3140		EUR	PGP - Ashkenazim Jewish	HG002	HG002 1 JAHKSE010000252.1	303	0.607	0.639	0.508	0.714	FALSE	5	SD	SD and High GA/TC (80%)
chr16	30981501	30981502	96330374	-	1	JAHKSE010000443.1	75962	75963	75963	0	0	0	0	1	0	0	0	0	HPRC_PLUS	male	3140		EUR	PGP - Ashkenazim Jewish	HG002	HG002 1 JAHKSE010000443.1	304	0.597	0.565	0.645	0.642	FALSE	2	Poisson breaks	Chromosome end or Poisson
chr16	31057435	31057436	96330374	-	1	JAHKSE010000443.1	0	1	75963	0	0	0	0	1	0	0	0	0	HPRC_PLUS	male	3140		EUR	PGP - Ashkenazim Jewish	HG002	HG002 1 JAHKSE010000443.1	305	0.584	0.591	0.697	0.571	FALSE	3	other	other
chr16	33067758	33067759	96330374	-	1	JAHKSE010000330.1	69317	69318	69318	0	0	0	0	1	0	0	0	0	HPRC_PLUS	male	3140		EUR	PGP - Ashkenazim Jewish	HG002	HG002 1 JAHKSE010000330.1	306	0.581	0.775	0.685	0.747	FALSE	45	SD	SD and High GA/TC (80%)
chr16	33111426	33111427	96330374	-	1	JAHKSE010000330.1	25651	25652	69318	0	0	0	0	1	0	0	0	0	HPRC_PLUS	male	3140		EUR	PGP - Ashkenazim Jewish	HG002	HG002 1 JAHKSE010000330.1	307	0.591	0.593	0.591	0.704	FALSE	48	SD	SD and High GA/TC (80%)
chr16	35949979	35949980	96330374	-	1	JAHKSE010000086.1	0	1	11900521	100	100	100	1	0	0	0	0	0	HPRC_PLUS	male	3140		EUR	PGP - Ashkenazim Jewish	HG002	HG002 1 JAHKSE010000086.1	308	0.502	0.514	0.404	0.616	FALSE	59	Alpha	Satellite
chr16	35998037	35998038	96330374	-	1	JAHKSE010000238.1	837545	837546	837549	0	0	0	0	1	0	0	0	0	HPRC_PLUS	male	3140		EUR	PGP - Ashkenazim Jewish	HG002	HG002 1 JAHKSE010000238.1	309	0.505	0.518	0.405	0.613	FALSE	74	Alpha	Satellite
chr16	36060929	36060930	96330374	+	1	JAHKSE010000479.1	1	2	33394	0	0	0	0	1	0	0	0	0	HPRC_PLUS	male	3140		EUR	PGP - Ashkenazim Jewish	HG002	HG002 1 JAHKSE010000479.1	310	0.506	0.519	0.404	0.612	FALSE	73	Alpha	Satellite
chr16	36093998	36093999	96330374	+	1	JAHKSE010000479.1	33393	33394	33394	0	0	0	0	1	0	0	0	0	HPRC_PLUS	male	3140		EUR	PGP - Ashkenazim Jewish	HG002	HG002 1 JAHKSE010000479.1	311	0.504	0.518	0.402	0.612	FALSE	72	Alpha	Satellite
chr16	36231574	36231575	96330374	-	1	JAHKSE010000238.1	0	1	837549	0	0	0	0	1	0	0	0	0	HPRC_PLUS	male	3140		EUR	PGP - Ashkenazim Jewish	HG002	HG002 1 JAHKSE010000238.1	312	0.504	0.517	0.403	0.612	FALSE	58	Alpha	Satellite
chr16	36601179	36601180	96330374	-	1	JAHKSE010000310.1	594855	594856	605807	0	0	0	0	1	0	0	0	0	HPRC_PLUS	male	3140		EUR	PGP - Ashkenazim Jewish	HG002	HG002 1 JAHKSE010000310.1	313	0.502	0.514	0.403	0.61	FALSE	78	Alpha	Satellite
chr16	36994272	36994273	96330374	-	1	JAHKSE010000310.1	5289	5290	605807	0	0	0	0	1	0	0	0	0	HPRC_PLUS	male	3140		EUR	PGP - Ashkenazim Jewish	HG002	HG002 1 JAHKSE010000310.1	314	0.503	0.515	0.405	0.611	FALSE	8	Alpha	Satellite
chr16	37209799	37209800	96330374	+	1	JAHKSE010000107.1	0	1	5392561	0	0	0	0	1	0	0	0	0	HPRC_PLUS	male	3140		EUR	PGP - Ashkenazim Jewish	HG002	HG002 1 JAHKSE010000107.1	315	0.505	0.515	0.402	0.613	FALSE	48	Alpha	Satellite
chr16	45135084	45135085	96330374	+	1	JAHKSE010000107.1	5375117	5375118	5392561	100	100	100	1	0	0	0	0	0	HPRC_PLUS	male	3140		EUR	PGP - Ashkenazim Jewish	HG002	HG002 1 JAHKSE010000107.1	316	0.403	0.628	0.382	0.652	FALSE	5	Satellite	Satellite
chr16	49565832	49565833	96330374	-	1	JAHKSE010000200.1	12333	12334	5299334	0	0	0	0	1	0	0	0	0	HPRC_PLUS	male	3140		EUR	PGP - Ashkenazim Jewish	HG002	HG002 1 JAHKSE010000200.1	317	0.4	0.634	0.382	0.652	FALSE	9	Satellite	Satellite
chr16	50715991	50715992	96330374	+	1	JAHKSE010000278.1	0	1	865759	0	0	0	0	1	0	0	0	0	HPRC_PLUS	male	3140		EUR	PGP - Ashkenazim Jewish	HG002	HG002 1 JAHKSE010000278.1	318	0.403	0.627	0.382	0.652	FALSE	8	Satellite	Satellite
chr16	50718212	50718213	96330374	-	1	JAHKSE010000200.1	5299333	5299334	5299334	0	0	0	0	1	0	0	0	0	HPRC_PLUS	male	3140		EUR	PGP - Ashkenazim Jewish	HG002	HG002 1 JAHKSE010000200.1	319	0.403	0.627	0.382	0.652	FALSE	8	Satellite	Satellite
chr16	50773555	50773556	96330374	+	1	JAHKSE010000226.1	15609	15610	710318	0	0	0	0	1	0	0	0	0	HPRC_PLUS	male	3140		EUR	PGP - Ashkenazim Jewish	HG002	HG002 1 JAHKSE010000226.1	320	0.402	0.641	0.379	0.653	FALSE	9	Satellite	Satellite
chr16	51352023	51352024	96330374	+	1	JAHKSE010000278.1	865758	865759	865759	0	0	0	0	1	0	0	0	0	HPRC_PLUS	male	3140		EUR	PGP - Ashkenazim Jewish	HG002	HG002 1 JAHKSE010000278.1	321	0.401	0.628	0.382	0.653	FALSE	13	Satellite	Satellite
chr16	51362275	51362276	96330374	-	1	JAHKSE010000045.1	44676687	44676688	44686486	0	0	0	0	1	0	0	0	0	HPRC_PLUS	male	3140		EUR	PGP - Ashkenazim Jewish	HG002	HG002 1 JAHKSE010000045.1	322	0.402	0.627	0.382	0.651	FALSE	13	Satellite	Satellite
chr16	51589540	51589541	96330374	+	1	JAHKSE010000459.1	0	1	91054	0	0	0	0	1	0	0	0	0	HPRC_PLUS	male	3140		EUR	PGP - Ashkenazim Jewish	HG002	HG002 1 JAHKSE010000459.1	323	0.401	0.629	0.382	0.65	FALSE	46	Satellite	Satellite
chr16	51681774	51681775	96330374	+	1	JAHKSE010000459.1	91053	91054	91054	0	0	0	0	1	0	0	0	0	HPRC_PLUS	male	3140		EUR	PGP - Ashkenazim Jewish	HG002	HG002 1 JAHKSE010000459.1	324	0.402	0.63	0.382	0.654	FALSE	53	Satellite	Satellite
chr16	51690918	51690919	96330374	+	1	JAHKSE010000226.1	710317	710318	710318	0	0	0	0	1	0	0	0	0	HPRC_PLUS	male	3140		EUR	PGP - Ashkenazim Jewish	HG002	HG002 1 JAHKSE010000226.1	325	0.403	0.631	0.382	0.652	FALSE	52	Satellite	Satellite
chr16	96209045	96209046	96330374	-	1	JAHKSE010000045.1	0	1	44686486	0	0	0	0	1	0	0	0	0	HPRC_PLUS	male	3140		EUR	PGP - Ashkenazim Jewish	HG002	HG002 1 JAHKSE010000045.1	326	0.625	0.605	0.579	0.65	FALSE	26	Chromosome end	Chromosome end or Poisson
chr17	5479	5480	84276897	-	1	JAHKSE010000093.1	19104962	19104963	19124614	0	0	0	0	1	0	0	0	0	HPRC_PLUS	male	3140		EUR	PGP - Ashkenazim Jewish	HG002	HG002 1 JAHKSE010000093.1	327	0.604	0.668	0.568	0.651	FALSE	90	Chromosome end	Chromosome end or Poisson
chr17	19040007	19040008	84276897	+	1	JAHKSE010000093.1	0	1	19124614	100	100	100	1	0	0	0	0	0	HPRC_PLUS	male	3140		EUR	PGP - Ashkenazim Jewish	HG002	HG002 1 JAHKSE010000093.1	328	0.704	0.574	0.708	0.601	FALSE	130	SD	SD and High GA/TC (80%)
chr17	19154367	19154368	84276897	+	1	JAHKSE010000152.1	0	1	5351030	0	0	0	0	1	0	0	0	0	HPRC_PLUS	male	3140		EUR	PGP - Ashkenazim Jewish	HG002	HG002 1 JAHKSE010000152.1	329	0.706	0.571	0.703	0.609	FALSE	130	SD	SD and High GA/TC (80%)
chr17	23771842	23771843	84276897	+	1	JAHKSE010000193.1	8	9	120030	0	0	0	0	1	0	0	0	0	HPRC_PLUS	male	3140		EUR	PGP - Ashkenazim Jewish	HG002	HG002 1 JAHKSE010000193.1	330	0.522	0.508	0.421	0.602	FALSE	3	Alpha	Satellite
chr17	23892186	23892187	84276897	+	1	JAHKSE010000193.1	120029	120030	120030	0	0	0	0	1	0	0	0	0	HPRC_PLUS	male	3140		EUR	PGP - Ashkenazim Jewish	HG002	HG002 1 JAHKSE010000193.1	331	0.525	0.513	0.419	0.604	FALSE	9	Alpha	Satellite
chr17	24643386	24643387	84276897	+	1	JAHKSE010000152.1	5351029	5351030	5351030	0	0	0	0	1	0	0	0	0	HPRC_PLUS	male	3140		EUR	PGP - Ashkenazim Jewish	HG002	HG002 1 JAHKSE010000152.1	332	0.522	0.514	0.414	0.6	FALSE	13	Alpha	Satellite
chr17	24992708	24992709	84276897	-	1	JAHKSE010000442.1	150187	150188	150188	0	0	0	0	1	0	0	0	0	HPRC_PLUS	male	3140		EUR	PGP - Ashkenazim Jewish	HG002	HG002 1 JAHKSE010000442.1	333	0.522	0.515	0.414	0.6	FALSE	46	Alpha	Satellite
chr17	25138966	25138967	84276897	+	1	JAHKSE010000216.1	0	1	618887	0	0	0	0	1	0	0	0	0	HPRC_PLUS	male	3140		EUR	PGP - Ashkenazim Jewish	HG002	HG002 1 JAHKSE010000216.1	334	0.523	0.516	0.416	0.6	FALSE	90	Alpha	Satellite
chr17	25151220	25151221	84276897	-	1	JAHKSE010000442.1	0	1	150188	0	0	0	0	1	0	0	0	0	HPRC_PLUS	male	3140		EUR	PGP - Ashkenazim Jewish	HG002	HG002 1 JAHKSE010000442.1	335	0.523	0.516	0.417	0.601	FALSE	91	Alpha	Satellite
chr17	25766843	25766844	84276897	+	1	JAHKSE010000216.1	617707	617708	618887	0	0	0	0	1	0	0	0	0	HPRC_PLUS	male	3140		EUR	PGP - Ashkenazim Jewish	HG002	HG002 1 JAHKSE010000216.1	336	0.523	0.515	0.414	0.6	FALSE	51	Alpha	Satellite
chr17	25865336	25865337	84276897	+	1	JAHKSE010000338.1	0	1	528764	0	0	0	0	1	0	0	0	0	HPRC_PLUS	male	3140		EUR	PGP - Ashkenazim Jewish	HG002	HG002 1 JAHKSE010000338.1	337	0.523	0.514	0.416	0.604	FALSE	46	Alpha	Satellite
chr17	26111726	26111727	84276897	-	1	JAHKSE010000331.1	0	1	339362	0	0	0	0	1	0	0	0	0	HPRC_PLUS	male	3140		EUR	PGP - Ashkenazim Jewish	HG002	HG002 1 JAHKSE010000331.1	338	0.524	0.516	0.414	0.601	FALSE	106	Alpha	Satellite
chr17	26134346	26134347	84276897	-	1	JAHKSE010000422.1	423966	423967	423967	0	0	0	0	1	0	0	0	0	HPRC_PLUS	male	3140		EUR	PGP - Ashkenazim Jewish	HG002	HG002 1 JAHKSE010000422.1	339	0.523	0.516	0.415	0.602	FALSE	111	Alpha	Satellite
chr17	26149047	26149048	84276897	-	1	JAHKSE010000375.1	97492	97493	97493	0	0	0	0	1	0	0	0	0	HPRC_PLUS	male	3140		EUR	PGP - Ashkenazim Jewish	HG002	HG002 1 JAHKSE010000375.1	340	0.523	0.516	0.414	0.602	FALSE	121	Alpha	Satellite
chr17	26246555	26246556	84276897	-	1	JAHKSE010000375.1	0	1	97493	0	0	0	0	1	0	0	0	0	HPRC_PLUS	male	3140		EUR	PGP - Ashkenazim Jewish	HG002	HG002 1 JAHKSE010000375.1	341	0.523	0.516	0.414	0.603	FALSE	146	Alpha	Satellite
chr17	26279821	26279822	84276897	-	1	JAHKSE010000455.1	198716	198717	198717	0	0	0	0	1	0	0	0	0	HPRC_PLUS	male	3140		EUR	PGP - Ashkenazim Jewish	HG002	HG002 1 JAHKSE010000455.1	342	0.523	0.516	0.416	0.601	FALSE	131	Alpha	Satellite
chr17	26325821	26325822	84276897	+	1	JAHKSE010000078.1	5	6	12669554	0	0	0	0	1	0	0	0	0	HPRC_PLUS	male	3140		EUR	PGP - Ashkenazim Jewish	HG002	HG002 1 JAHKSE010000078.1	343	0.523	0.516	0.416	0.6	FALSE	124	Alpha	Satellite
chr17	26337732	26337733	84276897	-	1	JAHKSE010000331.1	339361	339362	339362	0	0	0	0	1	0	0	0	0	HPRC_PLUS	male	3140		EUR	PGP - Ashkenazim Jewish	HG002	HG002 1 JAHKSE010000331.1	344	0.523	0.517	0.416	0.6	FALSE	123	Alpha	Satellite
chr17	26393605	26393606	84276897	+	1	JAHKSE010000338.1	528763	528764	528764	0	0	0	0	1	0	0	0	0	HPRC_PLUS	male	3140		EUR	PGP - Ashkenazim Jewish	HG002	HG002 1 JAHKSE010000338.1	345	0.524	0.516	0.416	0.602	FALSE	109	Alpha	Satellite
chr17	26466475	26466476	84276897	-	1	JAHKSE010000322.1	183971	183972	191483	0	0	0	0	1	0	0	0	0	HPRC_PLUS	male	3140		EUR	PGP - Ashkenazim Jewish	HG002	HG002 1 JAHKSE010000322.1	346	0.521	0.517	0.415	0.602	FALSE	98	Alpha	Satellite
chr17	26482596	26482597	84276897	-	1	JAHKSE010000455.1	0	1	198717	0	0	0	0	1	0	0	0	0	HPRC_PLUS	male	3140		EUR	PGP - Ashkenazim Jewish	HG002	HG002 1 JAHKSE010000455.1	347	0.523	0.517	0.415	0.603	FALSE	101	Alpha	Satellite
chr17	26560696	26560697	84276897	-	1	JAHKSE010000422.1	0	1	423967	0	0	0	0	1	0	0	0	0	HPRC_PLUS	male	3140		EUR	PGP - Ashkenazim Jewish	HG002	HG002 1 JAHKSE010000422.1	348	0.523	0.515	0.414	0.6	FALSE	85	Alpha	Satellite
chr17	26653162	26653163	84276897	-	1	JAHKSE010000322.1	0	1	191483	0	0	0	0	1	0	0	0	0	HPRC_PLUS	male	3140		EUR	PGP - Ashkenazim Jewish	HG002	HG002 1 JAHKSE010000322.1	349	0.524	0.514	0.415	0.601	FALSE	228	Alpha	Satellite
chr17	37170439	37170440	84276897	+	1	JAHKSE010000218.1	50957	50958	7774267	100	100	100	1	0	0	0	0	0	HPRC_PLUS	male	3140		EUR	PGP - Ashkenazim Jewish	HG002	HG002 1 JAHKSE010000218.1	350	0.61	0.555	0.536	0.664	FALSE	22	SD	SD and High GA/TC (80%)
chr17	39057390	39057391	84276897	+	1	JAHKSE010000078.1	12652998	12652999	12669554	0	0	0	0	1	0	0	0	0	HPRC_PLUS	male	3140		EUR	PGP - Ashkenazim Jewish	HG002	HG002 1 JAHKSE010000078.1	351	0.605	0.582	0.667	0.687	FALSE	41	SD	SD and High GA/TC (80%)
chr17	44114173	44114174	84276897	+	1	JAHKSE010000153.1	3463	3464	72029	0	0	0	0	1	0	0	0	0	HPRC_PLUS	male	3140		EUR	PGP - Ashkenazim Jewish	HG002	HG002 1 JAHKSE010000153.1	352	0.608	0.659	0.663	0.561	FALSE	94	SD	SD and High GA/TC (80%)
chr17	44158184	44158185	84276897	+	1	JAHKSE010000153.1	72028	72029	72029	0	0	0	0	1	0	0	0	0	HPRC_PLUS	male	3140		EUR	PGP - Ashkenazim Jewish	HG002	HG002 1 JAHKSE010000153.1	353	0.609	0.646	0.661	0.483	FALSE	94	SD	SD and High GA/TC (80%)
chr17	46447359	46447360	84276897	-	1	JAHKSE010000044.1	37514702	37514703	37578822	0	0	0	0	1	0	0	0	0	HPRC_PLUS	male	3140		EUR	PGP - Ashkenazim Jewish	HG002	HG002 1 JAHKSE010000044.1	354	0.601	0.567	0.716	0.674	FALSE	11	SD	SD and High GA/TC (80%)
chr17	47250077	47250078	84276897	-	1	JAHKSE010000218.1	7774266	7774267	7774267	0	0	0	0	1	0	0	0	0	HPRC_PLUS	male	3140		EUR	PGP - Ashkenazim Jewish	HG002	HG002 1 JAHKSE010000218.1	355	0.641	0.645	0.469	0.685	FALSE	28	SD	SD and High GA/TC (80%)
chr17	84276873	84276874	84276897	-	1	JAHKSE010000044.1	370	371	37578822	0	0	0	0	1	0	0	0	0	HPRC_PLUS	male	3140		EUR	PGP - Ashkenazim Jewish	HG002	HG002 1 JAHKSE010000044.1	356	0.669	0.576	0.77	0.672	FALSE	99	Chromosome end	Chromosome end or Poisson
chr18	163533	163534	80542538	+	1	JAHKSE010000020.1	7816	7817	17428657	0	0	0	0	1	0	0	0	0	HPRC_PLUS	male	3140		EUR	PGP - Ashkenazim Jewish	HG002	HG002 1 JAHKSE010000020.1	357	0.615	0.633	0.732	0.724	FALSE	97	Chromosome end	Chromosome end or Poisson
chr18	16822792	16822793	80542538	-	1	JAHKSE010000185.1	471800	471801	471801	0	0	0	0	1	0	0	0	0	HPRC_PLUS	male	3140		EUR	PGP - Ashkenazim Jewish	HG002	HG002 1 JAHKSE010000185.1	358	0.522	0.494	0.404	0.61	FALSE	139	Alpha	Satellite
chr18	17333860	17333861	80542538	-	1	JAHKSE010000159.1	757024	757025	776082	0	0	0	0	1	0	0	0	0	HPRC_PLUS	male	3140		EUR	PGP - Ashkenazim Jewish	HG002	HG002 1 JAHKSE010000159.1	359	0.52	0.497	0.405	0.613	FALSE	3	Alpha	Satellite
chr18	17346211	17346212	80542538	+	1	JAHKSE010000020.1	17428656	17428657	17428657	0	0	0	0	1	0	0	0	0	HPRC_PLUS	male	3140		EUR	PGP - Ashkenazim Jewish	HG002	HG002 1 JAHKSE010000020.1	360	0.522	0.495	0.404	0.613	FALSE	3	Alpha	Satellite
chr18	18097045	18097046	80542538	-	1	JAHKSE010000159.1	0	1	776082	0	0	0	0	1	0	0	0	0	HPRC_PLUS	male	3140		EUR	PGP - Ashkenazim Jewish	HG002	HG002 1 JAHKSE010000159.1	361	0.521	0.494	0.406	0.608	FALSE	173	Alpha	Satellite
chr18	18255018	18255019	80542538	+	1	JAHKSE010000302.1	0	1	122557	0	0	0	0	1	0	0	0	0	HPRC_PLUS	male	3140		EUR	PGP - Ashkenazim Jewish	HG002	HG002 1 JAHKSE010000302.1	362	0.522	0.494	0.406	0.607	FALSE	142	Alpha	Satellite
chr18	18377561	18377562	80542538	+	1	JAHKSE010000302.1	122552	122553	122557	0	0	0	0	1	0	0	0	0	HPRC_PLUS	male	3140		EUR	PGP - Ashkenazim Jewish	HG002	HG002 1 JAHKSE010000302.1	363	0.523	0.496	0.406	0.608	FALSE	99	Alpha	Satellite
chr18	18612161	18612162	80542538	+	1	JAHKSE010000299.1	383	384	248181	0	0	0	0	1	0	0	0	0	HPRC_PLUS	male	3140		EUR	PGP - Ashkenazim Jewish	HG002	HG002 1 JAHKSE010000299.1	364	0.522	0.496	0.406	0.607	FALSE	37	Alpha	Satellite
chr18	18962656	18962657	80542538	-	1	JAHKSE010000482.1	123129	123130	126978	0	0	0	0	1	0	0	0	0	HPRC_PLUS	male	3140		EUR	PGP - Ashkenazim Jewish	HG002	HG002 1 JAHKSE010000482.1	365	0.521	0.496	0.405	0.611	FALSE	331	Alpha	Satellite
chr18	18989862	18989863	80542538	-	1	JAHKSE010000076.1	61503144	61503145	61505628	0	0	0	0	1	0	0	0	0	HPRC_PLUS	male	3140		EUR	PGP - Ashkenazim Jewish	HG002	HG002 1 JAHKSE010000076.1	366	0.522	0.495	0.406	0.612	FALSE	366	Alpha	Satellite
chr18	19010690	19010691	80542538	-	1	JAHKSE010000493.1	39931	39932	39932	0	0	0	0	1	0	0	0	0	HPRC_PLUS	male	3140		EUR	PGP - Ashkenazim Jewish	HG002	HG002 1 JAHKSE010000493.1	367	0.523	0.494	0.404	0.611	FALSE	392	Alpha	Satellite
chr18	19026222	19026223	80542538	-	1	JAHKSE010000460.1	95708	95709	95709	0	0	0	0	1	0	0	0	0	HPRC_PLUS	male	3140		EUR	PGP - Ashkenazim Jewish	HG002	HG002 1 JAHKSE010000460.1	368	0.521	0.494	0.405	0.611	FALSE	413	Alpha	Satellite
chr18	19045998	19045999	80542538	-	1	JAHKSE010000493.1	1577	1578	39932	0	0	0	0	1	0	0	0	0	HPRC_PLUS	male	3140		EUR	PGP - Ashkenazim Jewish	HG002	HG002 1 JAHKSE010000493.1	369	0.521	0.495	0.405	0.613	FALSE	433	Alpha	Satellite
chr18	19066803	19066804	80542538	+	1	JAHKSE010000299.1	248174	248175	248181	0	0	0	0	1	0	0	0	0	HPRC_PLUS	male	3140		EUR	PGP - Ashkenazim Jewish	HG002	HG002 1 JAHKSE010000299.1	370	0.522	0.495	0.406	0.614	FALSE	430	Alpha	Satellite
chr18	19070765	19070766	80542538	-	1	JAHKSE010000185.1	0	1	471801	0	0	0	0	1	0	0	0	0	HPRC_PLUS	male	3140		EUR	PGP - Ashkenazim Jewish	HG002	HG002 1 JAHKSE010000185.1	371	0.522	0.495	0.406	0.614	FALSE	424	Alpha	Satellite
chr18	19119218	19119219	80542538	-	1	JAHKSE010000460.1	2	3	95709	0	0	0	0	1	0	0	0	0	HPRC_PLUS	male	3140		EUR	PGP - Ashkenazim Jewish	HG002	HG002 1 JAHKSE010000460.1	372	0.522	0.495	0.405	0.613	FALSE	337	Alpha	Satellite
chr18	19192917	19192918	80542538	+	1	JAHKSE010000510.1	0	1	67101	0	0	0	0	1	0	0	0	0	HPRC_PLUS	male	3140		EUR	PGP - Ashkenazim Jewish	HG002	HG002 1 JAHKSE010000510.1	373	0.522	0.494	0.406	0.61	FALSE	220	Alpha	Satellite
chr18	19258319	19258320	80542538	+	1	JAHKSE010000510.1	67100	67101	67101	0	0	0	0	1	0	0	0	0	HPRC_PLUS	male	3140		EUR	PGP - Ashkenazim Jewish	HG002	HG002 1 JAHKSE010000510.1	374	0.523	0.496	0.405	0.61	FALSE	143	Alpha	Satellite
chr18	19282839	19282840	80542538	+	1	JAHKSE010000430.1	0	1	60709	0	0	0	0	1	0	0	0	0	HPRC_PLUS	male	3140		EUR	PGP - Ashkenazim Jewish	HG002	HG002 1 JAHKSE010000430.1	375	0.522	0.495	0.405	0.617	FALSE	143	Alpha	Satellite
chr18	19304192	19304193	80542538	-	1	JAHKSE010000482.1	0	1	126978	0	0	0	0	1	0	0	0	0	HPRC_PLUS	male	3140		EUR	PGP - Ashkenazim Jewish	HG002	HG002 1 JAHKSE010000482.1	376	0.52	0.495	0.406	0.614	FALSE	137	Alpha	Satellite
chr18	19342813	19342814	80542538	+	1	JAHKSE010000430.1	58273	58274	60709	0	0	0	0	1	0	0	0	0	HPRC_PLUS	male	3140		EUR	PGP - Ashkenazim Jewish	HG002	HG002 1 JAHKSE010000430.1	377	0.522	0.495	0.405	0.612	FALSE	104	Alpha	Satellite
chr18	25041025	25041026	80542538	+	1	JAHKSE010000500.1	0	1	38906	0	0	0	0	1	0	0	0	0	HPRC_PLUS	male	3140		EUR	PGP - Ashkenazim Jewish	HG002	HG002 1 JAHKSE010000500.1	378	0.623	0.67	0.555	0.643	FALSE	2	Poisson breaks	Chromosome end or Poisson
chr18	25079930	25079931	80542538	+	1	JAHKSE010000500.1	38905	38906	38906	0	0	0	0	1	0	0	0	0	HPRC_PLUS	male	3140		EUR	PGP - Ashkenazim Jewish	HG002	HG002 1 JAHKSE010000500.1	379	0.628	0.619	0.482	0.673	FALSE	2	Poisson breaks	Chromosome end or Poisson
chr18	80542537	80542538	80542538	-	1	JAHKSE010000076.1	1753	1754	61505628	0	0	0	0	1	0	0	0	0	HPRC_PLUS	male	3140		EUR	PGP - Ashkenazim Jewish	HG002	HG002 1 JAHKSE010000076.1	380	0.734	0.557	0.633	0.637	FALSE	94	Chromosome end	Chromosome end or Poisson
chr19	2636	2637	61707364	+	1	JAHKSE010000031.1	14205	14206	86209598	0	0	0	0	1	0	0	0	0	HPRC_PLUS	male	3140		EUR	PGP - Ashkenazim Jewish	HG002	HG002 1 JAHKSE010000031.1	381	0.616	0.69	0.805	0.514	FALSE	144	Chromosome end	Chromosome end or Poisson
chr19	64327	64328	61707364	-	1	JAHKSE010000056.1	8807365	8807366	8807366	0	0	0	0	1	0	0	0	0	HPRC_PLUS	male	3140		EUR	PGP - Ashkenazim Jewish	HG002	HG002 1 JAHKSE010000056.1	382	0.599	0.605	0.551	0.917	FALSE	148	Chromosome end	Chromosome end or Poisson
chr19	8764652	8764653	61707364	+	1	JAHKSE010000058.1	25	26	19210561	0	0	0	0	1	0	0	0	0	HPRC_PLUS	male	3140		EUR	PGP - Ashkenazim Jewish	HG002	HG002 1 JAHKSE010000058.1	383	0.552	0.586	0.599	0.591	FALSE	20	SD	SD and High GA/TC (80%)
chr19	8843559	8843560	61707364	-	1	JAHKSE010000056.1	0	1	8807366	0	0	0	0	1	0	0	0	0	HPRC_PLUS	male	3140		EUR	PGP - Ashkenazim Jewish	HG002	HG002 1 JAHKSE010000056.1	384	0.553	0.587	0.598	0.586	FALSE	15	SD	SD and High GA/TC (80%)
chr19	26869843	26869844	61707364	+	1	JAHKSE010000061.1	157505	157506	10457592	0	0	0	0	1	0	0	0	0	HPRC_PLUS	male	3140		EUR	PGP - Ashkenazim Jewish	HG002	HG002 1 JAHKSE010000061.1	385	0.502	0.516	0.405	0.613	FALSE	16	Alpha	Satellite
chr19	29117692	29117693	61707364	+	1	JAHKSE010000058.1	16879993	16879994	19210561	100	100	100	1	0	0	0	0	0	HPRC_PLUS	male	3140		EUR	PGP - Ashkenazim Jewish	HG002	HG002 1 JAHKSE010000058.1	386	0.501	0.519	0.398	0.624	FALSE	2	Poisson breaks	Chromosome end or Poisson
chr19	38865236	38865237	61707364	+	1	JAHKSE010000261.1	0	1	35723	0	0	0	0	1	0	0	0	0	HPRC_PLUS	male	3140		EUR	PGP - Ashkenazim Jewish	HG002	HG002 1 JAHKSE010000261.1	387	0.507	0.586	0.68	0.383	FALSE	64	SD	SD and High GA/TC (80%)
chr19	38901058	38901059	61707364	+	1	JAHKSE010000261.1	35722	35723	35723	0	0	0	0	1	0	0	0	0	HPRC_PLUS	male	3140		EUR	PGP - Ashkenazim Jewish	HG002	HG002 1 JAHKSE010000261.1	388	0.505	0.588	0.68	0.384	FALSE	76	SD	SD and High GA/TC (80%)
chr19	38903753	38903754	61707364	-	1	JAHKSE010000050.1	19771002	19771003	19771003	0	0	0	0	1	0	0	0	0	HPRC_PLUS	male	3140		EUR	PGP - Ashkenazim Jewish	HG002	HG002 1 JAHKSE010000050.1	389	0.505	0.588	0.68	0.384	FALSE	76	SD	SD and High GA/TC (80%)
chr19	38918785	38918786	61707364	+	1	JAHKSE010000061.1	10457591	10457592	10457592	0	0	0	0	1	0	0	0	0	HPRC_PLUS	male	3140		EUR	PGP - Ashkenazim Jewish	HG002	HG002 1 JAHKSE010000061.1	390	0.505	0.588	0.682	0.385	FALSE	73	SD	SD and High GA/TC (80%)
chr19	58810366	58810367	61707364	-	1	JAHKSE010000050.1	197	198	19771003	0	0	0	0	1	0	0	0	0	HPRC_PLUS	male	3140		EUR	PGP - Ashkenazim Jewish	HG002	HG002 1 JAHKSE010000050.1	391	0.985	0.886	0.706	0.655	FALSE	192	High GA/TC (80%)	High GA/TC (80%)
chr19	58811525	58811526	61707364	-	1	JAHKSE010000139.1	2908952	2908953	2909149	0	0	0	0	1	0	0	0	0	HPRC_PLUS	male	3140		EUR	PGP - Ashkenazim Jewish	HG002	HG002 1 JAHKSE010000139.1	392	0.985	0.886	0.706	0.655	FALSE	192	High GA/TC (80%)	High GA/TC (80%)
chr19	61702785	61702786	61707364	-	1	JAHKSE010000139.1	16249	16250	2909149	0	0	0	0	1	0	0	0	0	HPRC_PLUS	male	3140		EUR	PGP - Ashkenazim Jewish	HG002	HG002 1 JAHKSE010000139.1	393	0.68	0.562	0.74	0.686	FALSE	96	Chromosome end	Chromosome end or Poisson
chr2	10	11	242696752	+	1	JAHKSE010000118.1	259	260	6394266	0	0	0	0	1	0	0	0	0	HPRC_PLUS	male	3140		EUR	PGP - Ashkenazim Jewish	HG002	HG002 1 JAHKSE010000118.1	394	0.571	0.678	0.804	0.645	FALSE	94	Chromosome end	Chromosome end or Poisson
chr2	6349073	6349074	242696752	+	1	JAHKSE010000054.1	9464	9465	84969781	0	0	0	0	1	0	0	0	0	HPRC_PLUS	male	3140		EUR	PGP - Ashkenazim Jewish	HG002	HG002 1 JAHKSE010000054.1	395	0.619	0.626	0.477	0.686	FALSE	4	other	other
chr2	6385784	6385785	242696752	+	1	JAHKSE010000118.1	6394265	6394266	6394266	0	0	0	0	1	0	0	0	0	HPRC_PLUS	male	3140		EUR	PGP - Ashkenazim Jewish	HG002	HG002 1 JAHKSE010000118.1	396	0.57	0.565	0.518	0.747	FALSE	4	other	other
chr2	88829519	88829520	242696752	-	1	JAHKSE010000043.1	48959	48960	48960	0	0	0	0	1	0	0	0	0	HPRC_PLUS	male	3140		EUR	PGP - Ashkenazim Jewish	HG002	HG002 1 JAHKSE010000043.1	397	0.596	0.601	0.599	0.667	FALSE	135	SD	SD and High GA/TC (80%)
chr2	88878469	88878470	242696752	-	1	JAHKSE010000043.1	0	1	48960	0	0	0	0	1	0	0	0	0	HPRC_PLUS	male	3140		EUR	PGP - Ashkenazim Jewish	HG002	HG002 1 JAHKSE010000043.1	398	0.585	0.774	0.509	0.728	FALSE	169	other	other
chr2	88913011	88913012	242696752	-	1	JAHKSE010000069.1	0	1	332006	0	0	0	0	1	0	0	0	0	HPRC_PLUS	male	3140		EUR	PGP - Ashkenazim Jewish	HG002	HG002 1 JAHKSE010000069.1	399	0.608	0.606	0.443	0.733	FALSE	182	other	other
chr2	89196710	89196711	242696752	+	1	JAHKSE010000069.1	332005	332006	332006	0	0	0	0	1	0	0	0	0	HPRC_PLUS	male	3140		EUR	PGP - Ashkenazim Jewish	HG002	HG002 1 JAHKSE010000069.1	400	0.621	0.585	0.481	0.743	FALSE	74	SD	SD and High GA/TC (80%)
chr2	89198993	89198994	242696752	-	1	JAHKSE010000300.1	57592	57593	57593	0	0	0	0	1	0	0	0	0	HPRC_PLUS	male	3140		EUR	PGP - Ashkenazim Jewish	HG002	HG002 1 JAHKSE010000300.1	401	0.621	0.624	0.481	0.743	FALSE	75	SD	SD and High GA/TC (80%)
chr2	89256589	89256590	242696752	-	1	JAHKSE010000300.1	0	1	57593	0	0	0	0	1	0	0	0	0	HPRC_PLUS	male	3140		EUR	PGP - Ashkenazim Jewish	HG002	HG002 1 JAHKSE010000300.1	402	0.618	0.646	0.511	0.681	FALSE	54	SD	SD and High GA/TC (80%)
chr2	89673067	89673068	242696752	-	1	JAHKSE010000469.1	51987	51988	51988	0	0	0	0	1	0	0	0	0	HPRC_PLUS	male	3140		EUR	PGP - Ashkenazim Jewish	HG002	HG002 1 JAHKSE010000469.1	403	0.639	0.597	0.729	0.689	FALSE	26	SD	SD and High GA/TC (80%)
chr2	89725030	89725031	242696752	-	1	JAHKSE010000469.1	0	1	51988	0	0	0	0	1	0	0	0	0	HPRC_PLUS	male	3140		EUR	PGP - Ashkenazim Jewish	HG002	HG002 1 JAHKSE010000469.1	404	0.572	0.596	0.674	0.828	FALSE	55	SD	SD and High GA/TC (80%)
chr2	90920497	90920498	242696752	-	1	JAHKSE010000054.1	84969780	84969781	84969781	0	0	0	0	1	0	0	0	0	HPRC_PLUS	male	3140		EUR	PGP - Ashkenazim Jewish	HG002	HG002 1 JAHKSE010000054.1	405	0.615	0.601	0.506	0.671	FALSE	14	SD	SD and High GA/TC (80%)
chr2	91162175	91162176	242696752	-	1	JAHKSE010000414.1	13102	13103	147141	0	0	0	0	1	0	0	0	0	HPRC_PLUS	male	3140		EUR	PGP - Ashkenazim Jewish	HG002	HG002 1 JAHKSE010000414.1	406	0.634	0.394	0.39	0.65	FALSE	7	Satellite	Satellite
chr2	91185043	91185044	242696752	-	1	JAHKSE010000414.1	138136	138137	147141	0	0	0	0	1	0	0	0	0	HPRC_PLUS	male	3140		EUR	PGP - Ashkenazim Jewish	HG002	HG002 1 JAHKSE010000414.1	407	0.634	0.391	0.394	0.646	FALSE	6	Satellite	Satellite
chr2	91647237	91647238	242696752	-	1	JAHKSE010000178.1	585686	585687	585687	0	0	0	0	1	0	0	0	0	HPRC_PLUS	male	3140		EUR	PGP - Ashkenazim Jewish	HG002	HG002 1 JAHKSE010000178.1	408	0.752	0.609	0.515	0.761	FALSE	15	SD	SD and High GA/TC (80%)
chr2	92018087	92018088	242696752	+	1	JAHKSE010000178.1	0	1	585687	100	100	100	1	0	0	0	0	0	HPRC_PLUS	male	3140		EUR	PGP - Ashkenazim Jewish	HG002	HG002 1 JAHKSE010000178.1	409	0.596	0.618	0.518	0.716	FALSE	27	SD	SD and High GA/TC (80%)
chr2	92241239	92241240	242696752	+	1	JAHKSE010000219.1	0	1	2266856	0	0	0	0	1	0	0	0	0	HPRC_PLUS	male	3140		EUR	PGP - Ashkenazim Jewish	HG002	HG002 1 JAHKSE010000219.1	410	0.718	0.767	0.708	0.766	FALSE	42	SD	SD and High GA/TC (80%)
chr2	94732570	94732571	242696752	-	1	JAHKSE010000219.1	2266855	2266856	2266856	0	0	0	0	1	0	0	0	0	HPRC_PLUS	male	3140		EUR	PGP - Ashkenazim Jewish	HG002	HG002 1 JAHKSE010000219.1	411	0.772	0.716	0.649	0.744	FALSE	97	SD	SD and High GA/TC (80%)
chr2	94799354	94799355	242696752	-	1	JAHKSE010000074.1	1168605	1168606	1168606	0	0	0	0	1	0	0	0	0	HPRC_PLUS	male	3140		EUR	PGP - Ashkenazim Jewish	HG002	HG002 1 JAHKSE010000074.1	412	0.586	0.768	0.534	0.756	FALSE	167	SD	SD and High GA/TC (80%)
chr2	95948529	95948530	242696752	+	1	JAHKSE010000446.1	0	1	191951	0	0	0	0	1	0	0	0	0	HPRC_PLUS	male	3140		EUR	PGP - Ashkenazim Jewish	HG002	HG002 1 JAHKSE010000446.1	413	0.566	0.621	0.551	0.699	FALSE	15	SD	SD and High GA/TC (80%)
chr2	95967537	95967538	242696752	-	1	JAHKSE010000074.1	0	1	1168606	0	0	0	0	1	0	0	0	0	HPRC_PLUS	male	3140		EUR	PGP - Ashkenazim Jewish	HG002	HG002 1 JAHKSE010000074.1	414	0.609	0.602	0.539	0.742	FALSE	14	SD	SD and High GA/TC (80%)
chr2	96121229	96121230	242696752	-	1	JAHKSE010000024.1	28001633	28001634	28001634	0	0	0	0	1	0	0	0	0	HPRC_PLUS	male	3140		EUR	PGP - Ashkenazim Jewish	HG002	HG002 1 JAHKSE010000024.1	415	0.598	0.608	0.528	0.738	FALSE	21	SD	SD and High GA/TC (80%)
chr2	96140515	96140516	242696752	+	1	JAHKSE010000446.1	191950	191951	191951	0	0	0	0	1	0	0	0	0	HPRC_PLUS	male	3140		EUR	PGP - Ashkenazim Jewish	HG002	HG002 1 JAHKSE010000446.1	416	0.626	0.608	0.551	0.732	FALSE	20	SD	SD and High GA/TC (80%)
chr2	124119307	124119308	242696752	-	1	JAHKSE010000024.1	4	5	28001634	0	0	0	0	1	0	0	0	0	HPRC_PLUS	male	3140		EUR	PGP - Ashkenazim Jewish	HG002	HG002 1 JAHKSE010000024.1	417	0.625	0.991	0.61	0.738	FALSE	144	High GA/TC (80%)	High GA/TC (80%)
chr2	124121040	124121041	242696752	+	1	JAHKSE010000021.1	0	1	118557555	0	0	0	0	1	0	0	0	0	HPRC_PLUS	male	3140		EUR	PGP - Ashkenazim Jewish	HG002	HG002 1 JAHKSE010000021.1	418	0.633	0.991	0.61	0.738	FALSE	144	High GA/TC (80%)	High GA/TC (80%)
chr2	130930101	130930102	242696752	-	1	JAHKSE010000359.1	89541	89542	89542	0	0	0	0	1	0	0	0	0	HPRC_PLUS	male	3140		EUR	PGP - Ashkenazim Jewish	HG002	HG002 1 JAHKSE010000359.1	419	0.612	0.603	0.449	0.718	FALSE	103	SD	SD and High GA/TC (80%)
chr2	131019633	131019634	242696752	-	1	JAHKSE010000359.1	0	1	89542	0	0	0	0	1	0	0	0	0	HPRC_PLUS	male	3140		EUR	PGP - Ashkenazim Jewish	HG002	HG002 1 JAHKSE010000359.1	420	0.582	0.611	0.614	0.615	FALSE	111	SD	SD and High GA/TC (80%)
chr2	242694128	242694129	242696752	+	1	JAHKSE010000021.1	118548547	118548548	118557555	0	0	0	0	1	0	0	0	0	HPRC_PLUS	male	3140		EUR	PGP - Ashkenazim Jewish	HG002	HG002 1 JAHKSE010000021.1	421	0.685	0.64	0.83	0.689	FALSE	101	Chromosome end	Chromosome end or Poisson
chr20	0	1	66210255	+	1	JAHKSE010000079.1	8143	8144	25872393	0	0	0	0	1	0	0	0	0	HPRC_PLUS	male	3140		EUR	PGP - Ashkenazim Jewish	HG002	HG002 1 JAHKSE010000079.1	422	0.583	0.669	0.753	0.669	FALSE	85	Chromosome end	Chromosome end or Poisson
chr20	25882186	25882187	66210255	+	1	JAHKSE010000079.1	25865400	25865401	25872393	0	0	0	0	1	0	0	0	0	HPRC_PLUS	male	3140		EUR	PGP - Ashkenazim Jewish	HG002	HG002 1 JAHKSE010000079.1	423	0.597	0.602	0.617	0.688	FALSE	5	SD	SD and High GA/TC (80%)
chr20	26057918	26057919	66210255	+	1	JAHKSE010000132.1	0	1	1347360	0	0	0	0	1	0	0	0	0	HPRC_PLUS	male	3140		EUR	PGP - Ashkenazim Jewish	HG002	HG002 1 JAHKSE010000132.1	424	0.591	0.597	0.627	0.659	FALSE	18	SD	SD and High GA/TC (80%)
chr20	26063659	26063660	66210255	+	1	JAHKSE010000266.1	265332	265333	265333	0	0	0	0	1	0	0	0	0	HPRC_PLUS	male	3140		EUR	PGP - Ashkenazim Jewish	HG002	HG002 1 JAHKSE010000266.1	425	0.591	0.597	0.627	0.659	FALSE	18	SD	SD and High GA/TC (80%)
chr20	26065009	26065010	66210255	-	1	JAHKSE010000266.1	0	1	265333	0	0	0	0	1	0	0	0	0	HPRC_PLUS	male	3140		EUR	PGP - Ashkenazim Jewish	HG002	HG002 1 JAHKSE010000266.1	426	0.591	0.597	0.627	0.659	FALSE	18	SD	SD and High GA/TC (80%)
chr20	27478867	27478868	66210255	-	1	JAHKSE010000113.1	37648415	37648416	37648424	0	0	0	0	1	0	0	0	0	HPRC_PLUS	male	3140		EUR	PGP - Ashkenazim Jewish	HG002	HG002 1 JAHKSE010000113.1	427	0.529	0.494	0.401	0.617	FALSE	63	Alpha	Satellite
chr20	28011305	28011306	66210255	+	1	JAHKSE010000132.1	1331270	1331271	1347360	100	100	100	1	0	0	0	0	0	HPRC_PLUS	male	3140		EUR	PGP - Ashkenazim Jewish	HG002	HG002 1 JAHKSE010000132.1	428	0.528	0.491	0.403	0.617	FALSE	57	Alpha	Satellite
chr20	28094205	28094206	66210255	+	1	JAHKSE010000301.1	0	1	321405	0	0	0	0	1	0	0	0	0	HPRC_PLUS	male	3140		EUR	PGP - Ashkenazim Jewish	HG002	HG002 1 JAHKSE010000301.1	429	0.529	0.493	0.403	0.617	FALSE	61	Alpha	Satellite
chr20	28422505	28422506	66210255	+	1	JAHKSE010000301.1	321333	321334	321405	0	0	0	0	1	0	0	0	0	HPRC_PLUS	male	3140		EUR	PGP - Ashkenazim Jewish	HG002	HG002 1 JAHKSE010000301.1	430	0.53	0.489	0.402	0.618	FALSE	214	Alpha	Satellite
chr20	32592940	32592941	66210255	+	1	JAHKSE010000461.1	0	1	40639	0	0	0	0	1	0	0	0	0	HPRC_PLUS	male	3140		EUR	PGP - Ashkenazim Jewish	HG002	HG002 1 JAHKSE010000461.1	431	0.757	0.286	0.419	0.617	FALSE	2	Poisson breaks	Chromosome end or Poisson
chr20	32631585	32631586	66210255	+	1	JAHKSE010000461.1	40638	40639	40639	0	0	0	0	1	0	0	0	0	HPRC_PLUS	male	3140		EUR	PGP - Ashkenazim Jewish	HG002	HG002 1 JAHKSE010000461.1	432	0.763	0.279	0.423	0.621	FALSE	2	Poisson breaks	Chromosome end or Poisson
chr20	64904379	64904380	66210255	-	1	JAHKSE010000113.1	43	44	37648424	0	0	0	0	1	0	0	0	0	HPRC_PLUS	male	3140		EUR	PGP - Ashkenazim Jewish	HG002	HG002 1 JAHKSE010000113.1	433	0.775	0.886	0.732	0.685	FALSE	196	High GA/TC (80%)	High GA/TC (80%)
chr20	64905019	64905020	66210255	+	1	JAHKSE010000072.1	0	1	1304810	0	0	0	0	1	0	0	0	0	HPRC_PLUS	male	3140		EUR	PGP - Ashkenazim Jewish	HG002	HG002 1 JAHKSE010000072.1	434	0.775	0.886	0.732	0.685	FALSE	196	High GA/TC (80%)	High GA/TC (80%)
chr20	66202673	66202674	66210255	+	1	JAHKSE010000072.1	1304809	1304810	1304810	0	0	0	0	1	0	0	0	0	HPRC_PLUS	male	3140		EUR	PGP - Ashkenazim Jewish	HG002	HG002 1 JAHKSE010000072.1	435	0.696	0.572	0.752	0.515	FALSE	142	Chromosome end	Chromosome end or Poisson
chr20	66206746	66206747	66210255	+	1	JAHKSE010000004.1	18304028	18304029	18309561	0	0	0	0	1	0	0	0	0	HPRC_PLUS	male	3140		EUR	PGP - Ashkenazim Jewish	HG002	HG002 1 JAHKSE010000004.1	436	0.696	0.572	0.752	0.515	FALSE	142	Chromosome end	Chromosome end or Poisson
chr21	26230	26231	45090682	+	1	JAHKSE010000474.1	0	1	77466	0	0	0	0	1	0	0	0	0	HPRC_PLUS	male	3140		EUR	PGP - Ashkenazim Jewish	HG002	HG002 1 JAHKSE010000474.1	437	0.595	0.619	0.496	0.705	TRUE	173	Chromosome end	Chromosome end or Poisson
chr21	86975	86976	45090682	+	1	JAHKSE010000474.1	60589	60590	77466	0	0	0	0	1	0	0	0	0	HPRC_PLUS	male	3140		EUR	PGP - Ashkenazim Jewish	HG002	HG002 1 JAHKSE010000474.1	438	0.555	0.65	0.582	0.608	TRUE	191	Chromosome end	Chromosome end or Poisson
chr21	157587	157588	45090682	-	1	JAHKSE010000131.1	3212108	3212109	3212174	0	0	0	0	1	0	0	0	0	HPRC_PLUS	male	3140		EUR	PGP - Ashkenazim Jewish	HG002	HG002 1 JAHKSE010000131.1	439	0.562	0.657	0.58	0.609	TRUE	63	Chromosome end	Chromosome end or Poisson
chr21	3171681	3171682	45090682	+	1	JAHKSE010000205.1	2608154	2608155	2608168	0	0	0	0	1	0	0	0	0	HPRC_PLUS	male	3140		EUR	PGP - Ashkenazim Jewish	HG002	HG002 1 JAHKSE010000205.1	440	0.551	0.885	0.84	0.545	TRUE	162	SD and High GA/TC (80%)	SD and High GA/TC (80%)
chr21	3817392	3817393	45090682	+	1	JAHKSE010000180.1	0	1	122800	0	0	0	0	1	0	0	0	0	HPRC_PLUS	male	3140		EUR	PGP - Ashkenazim Jewish	HG002	HG002 1 JAHKSE010000180.1	441	0.595	0.882	0.684	0.625	TRUE	188	SD and High GA/TC (80%)	SD and High GA/TC (80%)
chr21	3846957	3846958	45090682	+	1	JAHKSE010000068.1	0	1	122608	0	0	0	0	1	0	0	0	0	HPRC_PLUS	male	3140		EUR	PGP - Ashkenazim Jewish	HG002	HG002 1 JAHKSE010000068.1	442	0.553	0.885	0.811	0.547	TRUE	217	SD and High GA/TC (80%)	SD and High GA/TC (80%)
chr21	3854161	3854162	45090682	+	1	JAHKSE010000088.1	0	1	63960	0	0	0	0	1	0	0	0	0	HPRC_PLUS	male	3140		EUR	PGP - Ashkenazim Jewish	HG002	HG002 1 JAHKSE010000088.1	443	0.531	0.885	0.609	0.628	TRUE	222	SD and High GA/TC (80%)	SD and High GA/TC (80%)
chr21	3865876	3865877	45090682	-	1	JAHKSE010000094.1	49476	49477	49477	0	0	0	0	1	0	0	0	0	HPRC_PLUS	male	3140		EUR	PGP - Ashkenazim Jewish	HG002	HG002 1 JAHKSE010000094.1	444	0.596	0.882	0.837	0.628	TRUE	227	SD and High GA/TC (80%)	SD and High GA/TC (80%)
chr21	3893108	3893109	45090682	-	1	JAHKSE010000389.1	33530	33531	33531	0	0	0	0	1	0	0	0	0	HPRC_PLUS	male	3140		EUR	PGP - Ashkenazim Jewish	HG002	HG002 1 JAHKSE010000389.1	445	0.555	0.881	0.798	0.545	TRUE	235	SD and High GA/TC (80%)	SD and High GA/TC (80%)
chr21	3915269	3915270	45090682	-	1	JAHKSE010000094.1	0	1	49477	0	0	0	0	1	0	0	0	0	HPRC_PLUS	male	3140		EUR	PGP - Ashkenazim Jewish	HG002	HG002 1 JAHKSE010000094.1	446	0.596	0.85	0.844	0.626	TRUE	233	SD and High GA/TC (80%)	SD and High GA/TC (80%)
chr21	3918061	3918062	45090682	+	1	JAHKSE010000088.1	63959	63960	63960	0	0	0	0	1	0	0	0	0	HPRC_PLUS	male	3140		EUR	PGP - Ashkenazim Jewish	HG002	HG002 1 JAHKSE010000088.1	447	0.596	0.806	0.844	0.588	TRUE	230	SD and High GA/TC (80%)	SD and High GA/TC (80%)
chr21	3926616	3926617	45090682	-	1	JAHKSE010000389.1	0	1	33531	0	0	0	0	1	0	0	0	0	HPRC_PLUS	male	3140		EUR	PGP - Ashkenazim Jewish	HG002	HG002 1 JAHKSE010000389.1	448	0.552	0.778	0.844	0.544	TRUE	235	SD	SD and High GA/TC (80%)
chr21	3939077	3939078	45090682	+	1	JAHKSE010000180.1	122799	122800	122800	0	0	0	0	1	0	0	0	0	HPRC_PLUS	male	3140		EUR	PGP - Ashkenazim Jewish	HG002	HG002 1 JAHKSE010000180.1	449	0.546	0.881	0.799	0.547	TRUE	236	SD and High GA/TC (80%)	SD and High GA/TC (80%)
chr21	3969568	3969569	45090682	+	1	JAHKSE010000068.1	122607	122608	122608	0	0	0	0	1	0	0	0	0	HPRC_PLUS	male	3140		EUR	PGP - Ashkenazim Jewish	HG002	HG002 1 JAHKSE010000068.1	450	0.558	0.808	0.844	0.585	TRUE	200	SD and High GA/TC (80%)	SD and High GA/TC (80%)
chr21	4056270	4056271	45090682	+	1	JAHKSE010000207.1	0	1	51670	0	0	0	0	1	0	0	0	0	HPRC_PLUS	male	3140		EUR	PGP - Ashkenazim Jewish	HG002	HG002 1 JAHKSE010000207.1	451	0.587	0.81	0.842	0.588	TRUE	139	SD and High GA/TC (80%)	SD and High GA/TC (80%)
chr21	4069340	4069341	45090682	+	1	JAHKSE010000246.1	0	1	48819	0	0	0	0	1	0	0	0	0	HPRC_PLUS	male	3140		EUR	PGP - Ashkenazim Jewish	HG002	HG002 1 JAHKSE010000246.1	452	0.557	0.881	0.811	0.551	TRUE	136	SD and High GA/TC (80%)	SD and High GA/TC (80%)
chr21	4078873	4078874	45090682	-	1	JAHKSE010000080.1	112896	112897	112897	0	0	0	0	1	0	0	0	0	HPRC_PLUS	male	3140		EUR	PGP - Ashkenazim Jewish	HG002	HG002 1 JAHKSE010000080.1	453	0.535	0.881	0.607	0.623	TRUE	127	SD and High GA/TC (80%)	SD and High GA/TC (80%)
chr21	4106012	4106013	45090682	+	1	JAHKSE010000210.1	0	1	40377	0	0	0	0	1	0	0	0	0	HPRC_PLUS	male	3140		EUR	PGP - Ashkenazim Jewish	HG002	HG002 1 JAHKSE010000210.1	454	0.556	0.781	0.842	0.527	TRUE	131	SD	SD and High GA/TC (80%)
chr21	4107914	4107915	45090682	+	1	JAHKSE010000207.1	51669	51670	51670	0	0	0	0	1	0	0	0	0	HPRC_PLUS	male	3140		EUR	PGP - Ashkenazim Jewish	HG002	HG002 1 JAHKSE010000207.1	455	0.556	0.88	0.842	0.546	TRUE	130	SD and High GA/TC (80%)	SD and High GA/TC (80%)
chr21	4118090	4118091	45090682	+	1	JAHKSE010000246.1	48814	48815	48819	0	0	0	0	1	0	0	0	0	HPRC_PLUS	male	3140		EUR	PGP - Ashkenazim Jewish	HG002	HG002 1 JAHKSE010000246.1	456	0.538	0.88	0.783	0.546	TRUE	140	SD and High GA/TC (80%)	SD and High GA/TC (80%)
chr21	4146421	4146422	45090682	+	1	JAHKSE010000210.1	40376	40377	40377	0	0	0	0	1	0	0	0	0	HPRC_PLUS	male	3140		EUR	PGP - Ashkenazim Jewish	HG002	HG002 1 JAHKSE010000210.1	457	0.559	0.804	0.842	0.585	TRUE	127	SD and High GA/TC (80%)	SD and High GA/TC (80%)
chr21	4191857	4191858	45090682	-	1	JAHKSE010000080.1	0	1	112897	0	0	0	0	1	0	0	0	0	HPRC_PLUS	male	3140		EUR	PGP - Ashkenazim Jewish	HG002	HG002 1 JAHKSE010000080.1	458	0.552	0.803	0.844	0.583	TRUE	119	SD and High GA/TC (80%)	SD and High GA/TC (80%)
chr21	4217431	4217432	45090682	-	1	JAHKSE010000304.1	169683	169684	169684	0	0	0	0	1	0	0	0	0	HPRC_PLUS	male	3140		EUR	PGP - Ashkenazim Jewish	HG002	HG002 1 JAHKSE010000304.1	459	0.596	0.881	0.731	0.627	TRUE	111	SD and High GA/TC (80%)	SD and High GA/TC (80%)
chr21	4217896	4217897	45090682	+	1	JAHKSE010000395.1	0	1	42706	0	0	0	0	1	0	0	0	0	HPRC_PLUS	male	3140		EUR	PGP - Ashkenazim Jewish	HG002	HG002 1 JAHKSE010000395.1	460	0.596	0.881	0.757	0.627	TRUE	110	SD and High GA/TC (80%)	SD and High GA/TC (80%)
chr21	4260651	4260652	45090682	+	1	JAHKSE010000395.1	42705	42706	42706	0	0	0	0	1	0	0	0	0	HPRC_PLUS	male	3140		EUR	PGP - Ashkenazim Jewish	HG002	HG002 1 JAHKSE010000395.1	461	0.593	0.881	0.604	0.626	TRUE	100	SD and High GA/TC (80%)	SD and High GA/TC (80%)
chr21	4388816	4388817	45090682	-	1	JAHKSE010000304.1	0	1	169684	0	0	0	0	1	0	0	0	0	HPRC_PLUS	male	3140		EUR	PGP - Ashkenazim Jewish	HG002	HG002 1 JAHKSE010000304.1	462	0.535	0.879	0.608	0.623	TRUE	103	SD and High GA/TC (80%)	SD and High GA/TC (80%)
chr21	4553883	4553884	45090682	-	1	JAHKSE010000332.1	56367	56368	56368	0	0	0	0	1	0	0	0	0	HPRC_PLUS	male	3140		EUR	PGP - Ashkenazim Jewish	HG002	HG002 1 JAHKSE010000332.1	463	0.556	0.88	0.836	0.547	TRUE	127	SD and High GA/TC (80%)	SD and High GA/TC (80%)
chr21	4591287	4591288	45090682	-	1	JAHKSE010000571.1	30974	30975	30975	0	0	0	0	1	0	0	0	0	HPRC_PLUS	male	3140		EUR	PGP - Ashkenazim Jewish	HG002	HG002 1 JAHKSE010000571.1	464	0.558	0.808	0.843	0.585	TRUE	122	SD and High GA/TC (80%)	SD and High GA/TC (80%)
chr21	4595155	4595156	45090682	-	1	JAHKSE010000504.1	47063	47064	47064	0	0	0	0	1	0	0	0	0	HPRC_PLUS	male	3140		EUR	PGP - Ashkenazim Jewish	HG002	HG002 1 JAHKSE010000504.1	465	0.558	0.781	0.843	0.529	TRUE	126	SD	SD and High GA/TC (80%)
chr21	4610103	4610104	45090682	-	1	JAHKSE010000332.1	0	1	56368	0	0	0	0	1	0	0	0	0	HPRC_PLUS	male	3140		EUR	PGP - Ashkenazim Jewish	HG002	HG002 1 JAHKSE010000332.1	466	0.538	0.882	0.606	0.625	TRUE	124	SD and High GA/TC (80%)	SD and High GA/TC (80%)
chr21	4622206	4622207	45090682	-	1	JAHKSE010000571.1	0	1	30975	0	0	0	0	1	0	0	0	0	HPRC_PLUS	male	3140		EUR	PGP - Ashkenazim Jewish	HG002	HG002 1 JAHKSE010000571.1	467	0.588	0.875	0.842	0.625	TRUE	122	SD and High GA/TC (80%)	SD and High GA/TC (80%)
chr21	4642348	4642349	45090682	-	1	JAHKSE010000504.1	0	1	47064	0	0	0	0	1	0	0	0	0	HPRC_PLUS	male	3140		EUR	PGP - Ashkenazim Jewish	HG002	HG002 1 JAHKSE010000504.1	468	0.558	0.881	0.837	0.554	TRUE	127	SD and High GA/TC (80%)	SD and High GA/TC (80%)
chr21	4705399	4705400	45090682	+	1	JAHKSE010000095.1	0	1	30332	0	0	0	0	1	0	0	0	0	HPRC_PLUS	male	3140		EUR	PGP - Ashkenazim Jewish	HG002	HG002 1 JAHKSE010000095.1	469	0.594	0.88	0.683	0.624	TRUE	122	SD and High GA/TC (80%)	SD and High GA/TC (80%)
chr21	4732324	4732325	45090682	+	1	JAHKSE010000095.1	26981	26982	30332	0	0	0	0	1	0	0	0	0	HPRC_PLUS	male	3140		EUR	PGP - Ashkenazim Jewish	HG002	HG002 1 JAHKSE010000095.1	470	0.561	0.88	0.838	0.544	TRUE	120	SD and High GA/TC (80%)	SD and High GA/TC (80%)
chr21	4744850	4744851	45090682	-	1	JAHKSE010000163.1	68851	68852	68852	0	0	0	0	1	0	0	0	0	HPRC_PLUS	male	3140		EUR	PGP - Ashkenazim Jewish	HG002	HG002 1 JAHKSE010000163.1	471	0.544	0.881	0.609	0.628	TRUE	121	SD and High GA/TC (80%)	SD and High GA/TC (80%)
chr21	4772976	4772977	45090682	+	1	JAHKSE010000468.1	0	1	71789	0	0	0	0	1	0	0	0	0	HPRC_PLUS	male	3140		EUR	PGP - Ashkenazim Jewish	HG002	HG002 1 JAHKSE010000468.1	472	0.555	0.778	0.842	0.537	TRUE	129	SD	SD and High GA/TC (80%)
chr21	4801274	4801275	45090682	-	1	JAHKSE010000081.1	112133	112134	112134	0	0	0	0	1	0	0	0	0	HPRC_PLUS	male	3140		EUR	PGP - Ashkenazim Jewish	HG002	HG002 1 JAHKSE010000081.1	473	0.596	0.85	0.844	0.626	TRUE	129	SD and High GA/TC (80%)	SD and High GA/TC (80%)
chr21	4813732	4813733	45090682	-	1	JAHKSE010000163.1	2	3	68852	0	0	0	0	1	0	0	0	0	HPRC_PLUS	male	3140		EUR	PGP - Ashkenazim Jewish	HG002	HG002 1 JAHKSE010000163.1	474	0.552	0.778	0.844	0.584	TRUE	127	SD	SD and High GA/TC (80%)
chr21	4845397	4845398	45090682	+	1	JAHKSE010000468.1	71788	71789	71789	0	0	0	0	1	0	0	0	0	HPRC_PLUS	male	3140		EUR	PGP - Ashkenazim Jewish	HG002	HG002 1 JAHKSE010000468.1	475	0.595	0.851	0.844	0.625	TRUE	127	SD and High GA/TC (80%)	SD and High GA/TC (80%)
chr21	4913561	4913562	45090682	-	1	JAHKSE010000081.1	54	55	112134	0	0	0	0	1	0	0	0	0	HPRC_PLUS	male	3140		EUR	PGP - Ashkenazim Jewish	HG002	HG002 1 JAHKSE010000081.1	476	0.556	0.883	0.81	0.55	TRUE	130	SD and High GA/TC (80%)	SD and High GA/TC (80%)
chr21	4945745	4945746	45090682	+	1	JAHKSE010000092.1	0	1	29524	0	0	0	0	1	0	0	0	0	HPRC_PLUS	male	3140		EUR	PGP - Ashkenazim Jewish	HG002	HG002 1 JAHKSE010000092.1	477	0.557	0.81	0.842	0.588	TRUE	123	SD and High GA/TC (80%)	SD and High GA/TC (80%)
chr21	4975195	4975196	45090682	+	1	JAHKSE010000092.1	29523	29524	29524	0	0	0	0	1	0	0	0	0	HPRC_PLUS	male	3140		EUR	PGP - Ashkenazim Jewish	HG002	HG002 1 JAHKSE010000092.1	478	0.586	0.881	0.806	0.623	TRUE	127	SD and High GA/TC (80%)	SD and High GA/TC (80%)
chr21	5047876	5047877	45090682	+	1	JAHKSE010000531.1	0	1	31622	0	0	0	0	1	0	0	0	0	HPRC_PLUS	male	3140		EUR	PGP - Ashkenazim Jewish	HG002	HG002 1 JAHKSE010000531.1	479	0.551	0.881	0.798	0.543	TRUE	125	SD and High GA/TC (80%)	SD and High GA/TC (80%)
chr21	5049966	5049967	45090682	-	1	JAHKSE010000339.1	37549	37550	37559	0	0	0	0	1	0	0	0	0	HPRC_PLUS	male	3140		EUR	PGP - Ashkenazim Jewish	HG002	HG002 1 JAHKSE010000339.1	480	0.547	0.881	0.782	0.543	TRUE	128	SD and High GA/TC (80%)	SD and High GA/TC (80%)
chr21	5070915	5070916	45090682	+	1	JAHKSE010000356.1	0	1	39429	0	0	0	0	1	0	0	0	0	HPRC_PLUS	male	3140		EUR	PGP - Ashkenazim Jewish	HG002	HG002 1 JAHKSE010000356.1	481	0.596	0.803	0.844	0.626	TRUE	118	SD and High GA/TC (80%)	SD and High GA/TC (80%)
chr21	5079500	5079501	45090682	+	1	JAHKSE010000531.1	31621	31622	31622	0	0	0	0	1	0	0	0	0	HPRC_PLUS	male	3140		EUR	PGP - Ashkenazim Jewish	HG002	HG002 1 JAHKSE010000531.1	482	0.552	0.803	0.844	0.583	TRUE	118	SD and High GA/TC (80%)	SD and High GA/TC (80%)
chr21	5086796	5086797	45090682	-	1	JAHKSE010000387.1	28282	28283	28386	0	0	0	0	1	0	0	0	0	HPRC_PLUS	male	3140		EUR	PGP - Ashkenazim Jewish	HG002	HG002 1 JAHKSE010000387.1	483	0.552	0.879	0.837	0.546	TRUE	118	SD and High GA/TC (80%)	SD and High GA/TC (80%)
chr21	5087518	5087519	45090682	-	1	JAHKSE010000339.1	0	1	37559	0	0	0	0	1	0	0	0	0	HPRC_PLUS	male	3140		EUR	PGP - Ashkenazim Jewish	HG002	HG002 1 JAHKSE010000339.1	484	0.552	0.879	0.837	0.546	TRUE	118	SD and High GA/TC (80%)	SD and High GA/TC (80%)
chr21	5110325	5110326	45090682	+	1	JAHKSE010000356.1	39428	39429	39429	0	0	0	0	1	0	0	0	0	HPRC_PLUS	male	3140		EUR	PGP - Ashkenazim Jewish	HG002	HG002 1 JAHKSE010000356.1	485	0.596	0.873	0.842	0.627	TRUE	121	SD and High GA/TC (80%)	SD and High GA/TC (80%)
chr21	5115017	5115018	45090682	-	1	JAHKSE010000387.1	0	1	28386	0	0	0	0	1	0	0	0	0	HPRC_PLUS	male	3140		EUR	PGP - Ashkenazim Jewish	HG002	HG002 1 JAHKSE010000387.1	486	0.596	0.807	0.842	0.627	TRUE	118	SD and High GA/TC (80%)	SD and High GA/TC (80%)
chr21	5223825	5223826	45090682	+	1	JAHKSE010000408.1	0	1	51049	0	0	0	0	1	0	0	0	0	HPRC_PLUS	male	3140		EUR	PGP - Ashkenazim Jewish	HG002	HG002 1 JAHKSE010000408.1	487	0.555	0.881	0.81	0.554	TRUE	105	SD and High GA/TC (80%)	SD and High GA/TC (80%)
chr21	5271192	5271193	45090682	+	1	JAHKSE010000110.1	0	1	44046	0	0	0	0	1	0	0	0	0	HPRC_PLUS	male	3140		EUR	PGP - Ashkenazim Jewish	HG002	HG002 1 JAHKSE010000110.1	488	0.537	0.879	0.782	0.549	TRUE	114	SD and High GA/TC (80%)	SD and High GA/TC (80%)
chr21	5274903	5274904	45090682	+	1	JAHKSE010000408.1	51048	51049	51049	0	0	0	0	1	0	0	0	0	HPRC_PLUS	male	3140		EUR	PGP - Ashkenazim Jewish	HG002	HG002 1 JAHKSE010000408.1	489	0.535	0.879	0.608	0.623	TRUE	115	SD and High GA/TC (80%)	SD and High GA/TC (80%)
chr21	5305996	5305997	45090682	+	1	JAHKSE010000400.1	0	1	30391	0	0	0	0	1	0	0	0	0	HPRC_PLUS	male	3140		EUR	PGP - Ashkenazim Jewish	HG002	HG002 1 JAHKSE010000400.1	490	0.557	0.838	0.842	0.545	TRUE	124	SD and High GA/TC (80%)	SD and High GA/TC (80%)
chr21	5315162	5315163	45090682	+	1	JAHKSE010000110.1	44045	44046	44046	0	0	0	0	1	0	0	0	0	HPRC_PLUS	male	3140		EUR	PGP - Ashkenazim Jewish	HG002	HG002 1 JAHKSE010000110.1	491	0.54	0.88	0.794	0.545	TRUE	136	SD and High GA/TC (80%)	SD and High GA/TC (80%)
chr21	5324638	5324639	45090682	+	1	JAHKSE010000488.1	0	1	44348	0	0	0	0	1	0	0	0	0	HPRC_PLUS	male	3140		EUR	PGP - Ashkenazim Jewish	HG002	HG002 1 JAHKSE010000488.1	492	0.596	0.88	0.609	0.627	TRUE	143	SD and High GA/TC (80%)	SD and High GA/TC (80%)
chr21	5336415	5336416	45090682	+	1	JAHKSE010000400.1	30390	30391	30391	0	0	0	0	1	0	0	0	0	HPRC_PLUS	male	3140		EUR	PGP - Ashkenazim Jewish	HG002	HG002 1 JAHKSE010000400.1	493	0.596	0.802	0.842	0.627	TRUE	150	SD and High GA/TC (80%)	SD and High GA/TC (80%)
chr21	5369027	5369028	45090682	+	1	JAHKSE010000488.1	44342	44343	44348	0	0	0	0	1	0	0	0	0	HPRC_PLUS	male	3140		EUR	PGP - Ashkenazim Jewish	HG002	HG002 1 JAHKSE010000488.1	494	0.596	0.881	0.611	0.626	TRUE	206	SD and High GA/TC (80%)	SD and High GA/TC (80%)
chr21	5395572	5395573	45090682	-	1	JAHKSE010000082.1	170647	170648	170648	0	0	0	0	1	0	0	0	0	HPRC_PLUS	male	3140		EUR	PGP - Ashkenazim Jewish	HG002	HG002 1 JAHKSE010000082.1	495	0.551	0.88	0.844	0.546	TRUE	286	SD and High GA/TC (80%)	SD and High GA/TC (80%)
chr21	5427563	5427564	45090682	+	1	JAHKSE010000506.1	0	1	40153	0	0	0	0	1	0	0	0	0	HPRC_PLUS	male	3140		EUR	PGP - Ashkenazim Jewish	HG002	HG002 1 JAHKSE010000506.1	496	0.594	0.808	0.843	0.587	TRUE	420	SD and High GA/TC (80%)	SD and High GA/TC (80%)
chr21	5445781	5445782	45090682	-	1	JAHKSE010000134.1	109129	109130	109130	0	0	0	0	1	0	0	0	0	HPRC_PLUS	male	3140		EUR	PGP - Ashkenazim Jewish	HG002	HG002 1 JAHKSE010000134.1	497	0.556	0.882	0.81	0.547	TRUE	548	SD and High GA/TC (80%)	SD and High GA/TC (80%)
chr21	5462623	5462624	45090682	-	1	JAHKSE010000410.1	78231	78232	78232	0	0	0	0	1	0	0	0	0	HPRC_PLUS	male	3140		EUR	PGP - Ashkenazim Jewish	HG002	HG002 1 JAHKSE010000410.1	498	0.592	0.882	0.778	0.625	TRUE	660	SD and High GA/TC (80%)	SD and High GA/TC (80%)
chr21	5467748	5467749	45090682	+	1	JAHKSE010000506.1	40152	40153	40153	0	0	0	0	1	0	0	0	0	HPRC_PLUS	male	3140		EUR	PGP - Ashkenazim Jewish	HG002	HG002 1 JAHKSE010000506.1	499	0.592	0.851	0.843	0.625	TRUE	673	SD and High GA/TC (80%)	SD and High GA/TC (80%)
chr21	5485747	5485748	45090682	-	1	JAHKSE010000059.1	42706	42707	42707	0	0	0	0	1	0	0	0	0	HPRC_PLUS	male	3140		EUR	PGP - Ashkenazim Jewish	HG002	HG002 1 JAHKSE010000059.1	500	0.558	0.88	0.836	0.55	TRUE	820	SD and High GA/TC (80%)	SD and High GA/TC (80%)
chr21	5486582	5486583	45090682	+	1	JAHKSE010000100.1	0	1	40130	0	0	0	0	1	0	0	0	0	HPRC_PLUS	male	3140		EUR	PGP - Ashkenazim Jewish	HG002	HG002 1 JAHKSE010000100.1	501	0.558	0.88	0.836	0.55	TRUE	823	SD and High GA/TC (80%)	SD and High GA/TC (80%)
chr21	5489829	5489830	45090682	-	1	JAHKSE010000498.1	74173	74174	74197	0	0	0	0	1	0	0	0	0	HPRC_PLUS	male	3140		EUR	PGP - Ashkenazim Jewish	HG002	HG002 1 JAHKSE010000498.1	502	0.558	0.882	0.809	0.55	TRUE	820	SD and High GA/TC (80%)	SD and High GA/TC (80%)
chr21	5506218	5506219	45090682	-	1	JAHKSE010000320.1	71015	71016	71016	0	0	0	0	1	0	0	0	0	HPRC_PLUS	male	3140		EUR	PGP - Ashkenazim Jewish	HG002	HG002 1 JAHKSE010000320.1	503	0.588	0.882	0.775	0.625	TRUE	825	SD and High GA/TC (80%)	SD and High GA/TC (80%)
chr21	5526647	5526648	45090682	+	1	JAHKSE010000100.1	40129	40130	40130	0	0	0	0	1	0	0	0	0	HPRC_PLUS	male	3140		EUR	PGP - Ashkenazim Jewish	HG002	HG002 1 JAHKSE010000100.1	504	0.555	0.731	0.842	0.533	TRUE	815	SD	SD and High GA/TC (80%)
chr21	5528381	5528382	45090682	-	1	JAHKSE010000059.1	0	1	42707	0	0	0	0	1	0	0	0	0	HPRC_PLUS	male	3140		EUR	PGP - Ashkenazim Jewish	HG002	HG002 1 JAHKSE010000059.1	505	0.555	0.885	0.842	0.546	TRUE	810	SD and High GA/TC (80%)	SD and High GA/TC (80%)
chr21	5539200	5539201	45090682	-	1	JAHKSE010000236.1	37743	37744	37744	0	0	0	0	1	0	0	0	0	HPRC_PLUS	male	3140		EUR	PGP - Ashkenazim Jewish	HG002	HG002 1 JAHKSE010000236.1	506	0.533	0.885	0.783	0.627	TRUE	800	SD and High GA/TC (80%)	SD and High GA/TC (80%)
chr21	5539955	5539956	45090682	-	1	JAHKSE010000410.1	0	1	78232	0	0	0	0	1	0	0	0	0	HPRC_PLUS	male	3140		EUR	PGP - Ashkenazim Jewish	HG002	HG002 1 JAHKSE010000410.1	507	0.533	0.885	0.655	0.627	TRUE	800	SD and High GA/TC (80%)	SD and High GA/TC (80%)
chr21	5554780	5554781	45090682	-	1	JAHKSE010000134.1	0	1	109130	0	0	0	0	1	0	0	0	0	HPRC_PLUS	male	3140		EUR	PGP - Ashkenazim Jewish	HG002	HG002 1 JAHKSE010000134.1	508	0.597	0.851	0.843	0.627	TRUE	775	SD and High GA/TC (80%)	SD and High GA/TC (80%)
chr21	5562050	5562051	45090682	-	1	JAHKSE010000498.1	0	1	74197	0	0	0	0	1	0	0	0	0	HPRC_PLUS	male	3140		EUR	PGP - Ashkenazim Jewish	HG002	HG002 1 JAHKSE010000498.1	509	0.597	0.807	0.843	0.581	TRUE	761	SD and High GA/TC (80%)	SD and High GA/TC (80%)
chr21	5564259	5564260	45090682	-	1	JAHKSE010000082.1	0	1	170648	0	0	0	0	1	0	0	0	0	HPRC_PLUS	male	3140		EUR	PGP - Ashkenazim Jewish	HG002	HG002 1 JAHKSE010000082.1	510	0.597	0.807	0.843	0.581	TRUE	755	SD and High GA/TC (80%)	SD and High GA/TC (80%)
chr21	5575948	5575949	45090682	-	1	JAHKSE010000236.1	20	21	37744	0	0	0	0	1	0	0	0	0	HPRC_PLUS	male	3140		EUR	PGP - Ashkenazim Jewish	HG002	HG002 1 JAHKSE010000236.1	511	0.559	0.883	0.835	0.541	TRUE	733	SD and High GA/TC (80%)	SD and High GA/TC (80%)
chr21	5578154	5578155	45090682	-	1	JAHKSE010000320.1	0	1	71016	0	0	0	0	1	0	0	0	0	HPRC_PLUS	male	3140		EUR	PGP - Ashkenazim Jewish	HG002	HG002 1 JAHKSE010000320.1	512	0.559	0.883	0.807	0.546	TRUE	729	SD and High GA/TC (80%)	SD and High GA/TC (80%)
chr21	9856318	9856319	45090682	-	1	JAHKSE010000576.1	27987	27988	27988	0	0	0	0	1	0	0	0	0	HPRC_PLUS	male	3140		EUR	PGP - Ashkenazim Jewish	HG002	HG002 1 JAHKSE010000576.1	513	0.646	0.581	0.679	0.738	TRUE	7	SD	SD and High GA/TC (80%)
chr21	9884304	9884305	45090682	-	1	JAHKSE010000576.1	0	1	27988	0	0	0	0	1	0	0	0	0	HPRC_PLUS	male	3140		EUR	PGP - Ashkenazim Jewish	HG002	HG002 1 JAHKSE010000576.1	514	0.587	0.713	0.476	0.721	TRUE	9	SD	SD and High GA/TC (80%)
chr21	10207464	10207465	45090682	-	1	JAHKSE010000085.1	83001	83002	83011	0	0	0	0	1	0	0	0	0	HPRC_PLUS	male	3140		EUR	PGP - Ashkenazim Jewish	HG002	HG002 1 JAHKSE010000085.1	515	0.298	0.78	0.496	0.561	TRUE	13	SD	SD and High GA/TC (80%)
chr21	10278268	10278269	45090682	-	1	JAHKSE010000085.1	12181	12182	83011	0	0	0	0	1	0	0	0	0	HPRC_PLUS	male	3140		EUR	PGP - Ashkenazim Jewish	HG002	HG002 1 JAHKSE010000085.1	516	0.268	0.787	0.486	0.562	TRUE	13	SD	SD and High GA/TC (80%)
chr21	10677042	10677043	45090682	+	1	JAHKSE010000534.1	0	1	44556	0	0	0	0	1	0	0	0	0	HPRC_PLUS	male	3140		EUR	PGP - Ashkenazim Jewish	HG002	HG002 1 JAHKSE010000534.1	517	0.621	0.546	0.447	0.73	TRUE	7	SD	SD and High GA/TC (80%)
chr21	10721756	10721757	45090682	+	1	JAHKSE010000534.1	44555	44556	44556	0	0	0	0	1	0	0	0	0	HPRC_PLUS	male	3140		EUR	PGP - Ashkenazim Jewish	HG002	HG002 1 JAHKSE010000534.1	518	0.807	0.61	0.609	0.732	TRUE	16	SD and High GA/TC (80%)	SD and High GA/TC (80%)
chr21	10952031	10952032	45090682	-	1	JAHKSE010000070.1	97452177	97452178	97465776	0	0	0	0	1	0	0	0	0	HPRC_PLUS	male	3140		EUR	PGP - Ashkenazim Jewish	HG002	HG002 1 JAHKSE010000070.1	519	0.552	0.469	0.236	0.799	TRUE	222	Satellite	Satellite
chr21	11009247	11009248	45090682	+	1	JAHKSE010000206.1	0	1	32240	0	0	0	0	1	0	0	0	0	HPRC_PLUS	male	3140		EUR	PGP - Ashkenazim Jewish	HG002	HG002 1 JAHKSE010000206.1	520	0.494	0.532	0.398	0.626	TRUE	322	Alpha	Satellite
chr21	11045905	11045906	45090682	+	1	JAHKSE010000206.1	32239	32240	32240	0	0	0	0	1	0	0	0	0	HPRC_PLUS	male	3140		EUR	PGP - Ashkenazim Jewish	HG002	HG002 1 JAHKSE010000206.1	521	0.496	0.533	0.401	0.626	TRUE	389	Alpha	Satellite
chr21	11064733	11064734	45090682	+	1	JAHKSE010000546.1	0	1	28881	0	0	0	0	1	0	0	0	0	HPRC_PLUS	male	3140		EUR	PGP - Ashkenazim Jewish	HG002	HG002 1 JAHKSE010000546.1	522	0.494	0.531	0.401	0.627	TRUE	364	Alpha	Satellite
chr21	11076034	11076035	45090682	+	1	JAHKSE010000014.1	4540	4541	34296955	0	0	0	0	1	0	0	0	0	HPRC_PLUS	male	3140		EUR	PGP - Ashkenazim Jewish	HG002	HG002 1 JAHKSE010000014.1	523	0.494	0.532	0.401	0.622	TRUE	325	Alpha	Satellite
chr21	11095484	11095485	45090682	+	1	JAHKSE010000546.1	28880	28881	28881	0	0	0	0	1	0	0	0	0	HPRC_PLUS	male	3140		EUR	PGP - Ashkenazim Jewish	HG002	HG002 1 JAHKSE010000546.1	524	0.497	0.533	0.401	0.624	TRUE	310	Alpha	Satellite
chr21	45090681	45090682	45090682	+	1	JAHKSE010000014.1	34289206	34289207	34296955	0	0	0	0	1	0	0	0	0	HPRC_PLUS	male	3140		EUR	PGP - Ashkenazim Jewish	HG002	HG002 1 JAHKSE010000014.1	525	0.676	0.563	0.733	0.671	FALSE	95	Chromosome end	Chromosome end or Poisson
chr22	2552554	2552555	51324926	+	1	JAHKSE010000205.1	16895	16896	2608168	100	100	100	1	0	0	0	0	0	HPRC_PLUS	male	3140		EUR	PGP - Ashkenazim Jewish	HG002	HG002 1 JAHKSE010000205.1	526	0.759	0.274	0.422	0.605	TRUE	7	Satellite	Satellite
chr22	3868670	3868671	51324926	+	1	JAHKSE010000485.1	0	1	54987	0	0	0	0	1	0	0	0	0	HPRC_PLUS	male	3140		EUR	PGP - Ashkenazim Jewish	HG002	HG002 1 JAHKSE010000485.1	527	0.647	0.552	0.579	0.615	TRUE	22	SD	SD and High GA/TC (80%)
chr22	3923471	3923472	51324926	+	1	JAHKSE010000485.1	54986	54987	54987	0	0	0	0	1	0	0	0	0	HPRC_PLUS	male	3140		EUR	PGP - Ashkenazim Jewish	HG002	HG002 1 JAHKSE010000485.1	528	0.67	0.552	0.582	0.615	TRUE	38	SD	SD and High GA/TC (80%)
chr22	4686796	4686797	51324926	-	1	JAHKSE010000273.1	86811	86812	86812	0	0	0	0	1	0	0	0	0	HPRC_PLUS	male	3140		EUR	PGP - Ashkenazim Jewish	HG002	HG002 1 JAHKSE010000273.1	529	0.622	0.556	0.556	0.717	TRUE	25	SD	SD and High GA/TC (80%)
chr22	4704808	4704809	51324926	-	1	JAHKSE010000452.1	115108	115109	115109	0	0	0	0	1	0	0	0	0	HPRC_PLUS	male	3140		EUR	PGP - Ashkenazim Jewish	HG002	HG002 1 JAHKSE010000452.1	530	0.577	0.636	0.599	0.689	TRUE	39	SD	SD and High GA/TC (80%)
chr22	4773556	4773557	51324926	-	1	JAHKSE010000273.1	0	1	86812	0	0	0	0	1	0	0	0	0	HPRC_PLUS	male	3140		EUR	PGP - Ashkenazim Jewish	HG002	HG002 1 JAHKSE010000273.1	531	0.639	0.742	0.521	0.727	TRUE	122	SD	SD and High GA/TC (80%)
chr22	4819332	4819333	51324926	-	1	JAHKSE010000452.1	0	1	115109	0	0	0	0	1	0	0	0	0	HPRC_PLUS	male	3140		EUR	PGP - Ashkenazim Jewish	HG002	HG002 1 JAHKSE010000452.1	532	0.537	0.882	0.782	0.54	TRUE	147	SD and High GA/TC (80%)	SD and High GA/TC (80%)
chr22	4894335	4894336	51324926	+	1	JAHKSE010000511.1	0	1	29876	0	0	0	0	1	0	0	0	0	HPRC_PLUS	male	3140		EUR	PGP - Ashkenazim Jewish	HG002	HG002 1 JAHKSE010000511.1	533	0.558	0.663	0.845	0.531	TRUE	178	SD	SD and High GA/TC (80%)
chr22	4915587	4915588	51324926	+	1	JAHKSE010000177.1	0	1	46585	0	0	0	0	1	0	0	0	0	HPRC_PLUS	male	3140		EUR	PGP - Ashkenazim Jewish	HG002	HG002 1 JAHKSE010000177.1	534	0.599	0.886	0.611	0.62	TRUE	154	SD and High GA/TC (80%)	SD and High GA/TC (80%)
chr22	4924152	4924153	51324926	+	1	JAHKSE010000511.1	29875	29876	29876	0	0	0	0	1	0	0	0	0	HPRC_PLUS	male	3140		EUR	PGP - Ashkenazim Jewish	HG002	HG002 1 JAHKSE010000511.1	535	0.599	0.849	0.845	0.62	TRUE	145	SD and High GA/TC (80%)	SD and High GA/TC (80%)
chr22	4962171	4962172	51324926	+	1	JAHKSE010000177.1	46584	46585	46585	0	0	0	0	1	0	0	0	0	HPRC_PLUS	male	3140		EUR	PGP - Ashkenazim Jewish	HG002	HG002 1 JAHKSE010000177.1	536	0.598	0.882	0.775	0.621	TRUE	117	SD and High GA/TC (80%)	SD and High GA/TC (80%)
chr22	4993253	4993254	51324926	+	1	JAHKSE010000305.1	0	1	62687	0	0	0	0	1	0	0	0	0	HPRC_PLUS	male	3140		EUR	PGP - Ashkenazim Jewish	HG002	HG002 1 JAHKSE010000305.1	537	0.537	0.882	0.781	0.568	TRUE	109	SD and High GA/TC (80%)	SD and High GA/TC (80%)
chr22	5055938	5055939	51324926	+	1	JAHKSE010000305.1	62686	62687	62687	0	0	0	0	1	0	0	0	0	HPRC_PLUS	male	3140		EUR	PGP - Ashkenazim Jewish	HG002	HG002 1 JAHKSE010000305.1	538	0.589	0.806	0.845	0.622	TRUE	98	SD and High GA/TC (80%)	SD and High GA/TC (80%)
chr22	5123192	5123193	51324926	-	1	JAHKSE010000433.1	40110	40111	40111	0	0	0	0	1	0	0	0	0	HPRC_PLUS	male	3140		EUR	PGP - Ashkenazim Jewish	HG002	HG002 1 JAHKSE010000433.1	539	0.536	0.883	0.779	0.541	TRUE	108	SD and High GA/TC (80%)	SD and High GA/TC (80%)
chr22	5134622	5134623	51324926	+	1	JAHKSE010000277.1	0	1	76617	0	0	0	0	1	0	0	0	0	HPRC_PLUS	male	3140		EUR	PGP - Ashkenazim Jewish	HG002	HG002 1 JAHKSE010000277.1	540	0.599	0.882	0.767	0.62	TRUE	99	SD and High GA/TC (80%)	SD and High GA/TC (80%)
chr22	5137014	5137015	51324926	-	1	JAHKSE010000340.1	35997	35998	35998	0	0	0	0	1	0	0	0	0	HPRC_PLUS	male	3140		EUR	PGP - Ashkenazim Jewish	HG002	HG002 1 JAHKSE010000340.1	541	0.599	0.882	0.843	0.62	TRUE	100	SD and High GA/TC (80%)	SD and High GA/TC (80%)
chr22	5163315	5163316	51324926	-	1	JAHKSE010000433.1	0	1	40111	0	0	0	0	1	0	0	0	0	HPRC_PLUS	male	3140		EUR	PGP - Ashkenazim Jewish	HG002	HG002 1 JAHKSE010000433.1	542	0.558	0.882	0.811	0.54	TRUE	101	SD and High GA/TC (80%)	SD and High GA/TC (80%)
chr22	5173209	5173210	51324926	-	1	JAHKSE010000340.1	0	1	35998	0	0	0	0	1	0	0	0	0	HPRC_PLUS	male	3140		EUR	PGP - Ashkenazim Jewish	HG002	HG002 1 JAHKSE010000340.1	543	0.557	0.882	0.602	0.62	TRUE	103	SD and High GA/TC (80%)	SD and High GA/TC (80%)
chr22	5211051	5211052	51324926	+	1	JAHKSE010000277.1	76616	76617	76617	0	0	0	0	1	0	0	0	0	HPRC_PLUS	male	3140		EUR	PGP - Ashkenazim Jewish	HG002	HG002 1 JAHKSE010000277.1	544	0.537	0.883	0.78	0.621	TRUE	115	SD and High GA/TC (80%)	SD and High GA/TC (80%)
chr22	5291428	5291429	51324926	-	1	JAHKSE010000175.1	83424	83425	83425	0	0	0	0	1	0	0	0	0	HPRC_PLUS	male	3140		EUR	PGP - Ashkenazim Jewish	HG002	HG002 1 JAHKSE010000175.1	545	0.552	0.884	0.837	0.541	TRUE	131	SD and High GA/TC (80%)	SD and High GA/TC (80%)
chr22	5295481	5295482	51324926	-	1	JAHKSE010000324.1	44864	44865	44865	0	0	0	0	1	0	0	0	0	HPRC_PLUS	male	3140		EUR	PGP - Ashkenazim Jewish	HG002	HG002 1 JAHKSE010000324.1	546	0.549	0.884	0.799	0.542	TRUE	130	SD and High GA/TC (80%)	SD and High GA/TC (80%)
chr22	5312734	5312735	51324926	+	1	JAHKSE010000380.1	0	1	39136	0	0	0	0	1	0	0	0	0	HPRC_PLUS	male	3140		EUR	PGP - Ashkenazim Jewish	HG002	HG002 1 JAHKSE010000380.1	547	0.599	0.848	0.843	0.621	TRUE	129	SD and High GA/TC (80%)	SD and High GA/TC (80%)
chr22	5340340	5340341	51324926	-	1	JAHKSE010000324.1	0	1	44865	0	0	0	0	1	0	0	0	0	HPRC_PLUS	male	3140		EUR	PGP - Ashkenazim Jewish	HG002	HG002 1 JAHKSE010000324.1	548	0.537	0.883	0.78	0.595	TRUE	139	SD and High GA/TC (80%)	SD and High GA/TC (80%)
chr22	5351890	5351891	51324926	+	1	JAHKSE010000380.1	39135	39136	39136	0	0	0	0	1	0	0	0	0	HPRC_PLUS	male	3140		EUR	PGP - Ashkenazim Jewish	HG002	HG002 1 JAHKSE010000380.1	549	0.59	0.883	0.776	0.621	TRUE	141	SD and High GA/TC (80%)	SD and High GA/TC (80%)
chr22	5364305	5364306	51324926	+	1	JAHKSE010000255.1	0	1	268952	0	0	0	0	1	0	0	0	0	HPRC_PLUS	male	3140		EUR	PGP - Ashkenazim Jewish	HG002	HG002 1 JAHKSE010000255.1	550	0.59	0.792	0.843	0.574	TRUE	155	SD	SD and High GA/TC (80%)
chr22	5374677	5374678	51324926	-	1	JAHKSE010000175.1	0	1	83425	0	0	0	0	1	0	0	0	0	HPRC_PLUS	male	3140		EUR	PGP - Ashkenazim Jewish	HG002	HG002 1 JAHKSE010000175.1	551	0.557	0.883	0.843	0.543	TRUE	177	SD and High GA/TC (80%)	SD and High GA/TC (80%)
chr22	5381109	5381110	51324926	+	1	JAHKSE010000297.1	0	1	137560	0	0	0	0	1	0	0	0	0	HPRC_PLUS	male	3140		EUR	PGP - Ashkenazim Jewish	HG002	HG002 1 JAHKSE010000297.1	552	0.557	0.883	0.793	0.543	TRUE	179	SD and High GA/TC (80%)	SD and High GA/TC (80%)
chr22	5407967	5407968	51324926	+	1	JAHKSE010000120.1	0	1	28773	0	0	0	0	1	0	0	0	0	HPRC_PLUS	male	3140		EUR	PGP - Ashkenazim Jewish	HG002	HG002 1 JAHKSE010000120.1	553	0.584	0.803	0.844	0.574	TRUE	213	SD and High GA/TC (80%)	SD and High GA/TC (80%)
chr22	5436693	5436694	51324926	+	1	JAHKSE010000120.1	28772	28773	28773	0	0	0	0	1	0	0	0	0	HPRC_PLUS	male	3140		EUR	PGP - Ashkenazim Jewish	HG002	HG002 1 JAHKSE010000120.1	554	0.595	0.886	0.609	0.623	TRUE	315	SD and High GA/TC (80%)	SD and High GA/TC (80%)
chr22	5450437	5450438	51324926	+	1	JAHKSE010000155.1	0	1	231948	0	0	0	0	1	0	0	0	0	HPRC_PLUS	male	3140		EUR	PGP - Ashkenazim Jewish	HG002	HG002 1 JAHKSE010000155.1	555	0.595	0.806	0.844	0.578	TRUE	373	SD and High GA/TC (80%)	SD and High GA/TC (80%)
chr22	5453798	5453799	51324926	+	1	JAHKSE010000494.1	0	1	59277	0	0	0	0	1	0	0	0	0	HPRC_PLUS	male	3140		EUR	PGP - Ashkenazim Jewish	HG002	HG002 1 JAHKSE010000494.1	556	0.595	0.806	0.844	0.578	TRUE	378	SD and High GA/TC (80%)	SD and High GA/TC (80%)
chr22	5506430	5506431	51324926	+	1	JAHKSE010000583.1	0	1	43341	0	0	0	0	1	0	0	0	0	HPRC_PLUS	male	3140		EUR	PGP - Ashkenazim Jewish	HG002	HG002 1 JAHKSE010000583.1	557	0.558	0.883	0.837	0.538	TRUE	447	SD and High GA/TC (80%)	SD and High GA/TC (80%)
chr22	5513124	5513125	51324926	+	1	JAHKSE010000494.1	59276	59277	59277	0	0	0	0	1	0	0	0	0	HPRC_PLUS	male	3140		EUR	PGP - Ashkenazim Jewish	HG002	HG002 1 JAHKSE010000494.1	558	0.537	0.883	0.796	0.538	TRUE	450	SD and High GA/TC (80%)	SD and High GA/TC (80%)
chr22	5518087	5518088	51324926	+	1	JAHKSE010000297.1	137559	137560	137560	0	0	0	0	1	0	0	0	0	HPRC_PLUS	male	3140		EUR	PGP - Ashkenazim Jewish	HG002	HG002 1 JAHKSE010000297.1	559	0.537	0.883	0.607	0.618	TRUE	455	SD and High GA/TC (80%)	SD and High GA/TC (80%)
chr22	5549786	5549787	51324926	+	1	JAHKSE010000583.1	43275	43276	43341	0	0	0	0	1	0	0	0	0	HPRC_PLUS	male	3140		EUR	PGP - Ashkenazim Jewish	HG002	HG002 1 JAHKSE010000583.1	560	0.556	0.881	0.839	0.54	TRUE	504	SD and High GA/TC (80%)	SD and High GA/TC (80%)
chr22	5592702	5592703	51324926	+	1	JAHKSE010000572.1	0	1	33028	0	0	0	0	1	0	0	0	0	HPRC_PLUS	male	3140		EUR	PGP - Ashkenazim Jewish	HG002	HG002 1 JAHKSE010000572.1	561	0.55	0.882	0.838	0.538	TRUE	510	SD and High GA/TC (80%)	SD and High GA/TC (80%)
chr22	5592830	5592831	51324926	-	1	JAHKSE010000137.1	34680	34681	34681	0	0	0	0	1	0	0	0	0	HPRC_PLUS	male	3140		EUR	PGP - Ashkenazim Jewish	HG002	HG002 1 JAHKSE010000137.1	562	0.55	0.882	0.838	0.538	TRUE	510	SD and High GA/TC (80%)	SD and High GA/TC (80%)
chr22	5593512	5593513	51324926	+	1	JAHKSE010000363.1	0	1	37333	0	0	0	0	1	0	0	0	0	HPRC_PLUS	male	3140		EUR	PGP - Ashkenazim Jewish	HG002	HG002 1 JAHKSE010000363.1	563	0.55	0.882	0.838	0.538	TRUE	509	SD and High GA/TC (80%)	SD and High GA/TC (80%)
chr22	5593717	5593718	51324926	+	1	JAHKSE010000457.1	0	1	40492	0	0	0	0	1	0	0	0	0	HPRC_PLUS	male	3140		EUR	PGP - Ashkenazim Jewish	HG002	HG002 1 JAHKSE010000457.1	564	0.55	0.882	0.838	0.538	TRUE	509	SD and High GA/TC (80%)	SD and High GA/TC (80%)
chr22	5594868	5594869	51324926	+	1	JAHKSE010000373.1	0	1	35194	0	0	0	0	1	0	0	0	0	HPRC_PLUS	male	3140		EUR	PGP - Ashkenazim Jewish	HG002	HG002 1 JAHKSE010000373.1	565	0.55	0.882	0.838	0.545	TRUE	509	SD and High GA/TC (80%)	SD and High GA/TC (80%)
chr22	5594990	5594991	51324926	-	1	JAHKSE010000048.1	35409	35410	35410	0	0	0	0	1	0	0	0	0	HPRC_PLUS	male	3140		EUR	PGP - Ashkenazim Jewish	HG002	HG002 1 JAHKSE010000048.1	566	0.55	0.882	0.838	0.545	TRUE	509	SD and High GA/TC (80%)	SD and High GA/TC (80%)
chr22	5595285	5595286	51324926	-	1	JAHKSE010000525.1	30165	30166	30166	0	0	0	0	1	0	0	0	0	HPRC_PLUS	male	3140		EUR	PGP - Ashkenazim Jewish	HG002	HG002 1 JAHKSE010000525.1	567	0.55	0.882	0.838	0.545	TRUE	508	SD and High GA/TC (80%)	SD and High GA/TC (80%)
chr22	5595635	5595636	51324926	+	1	JAHKSE010000176.1	0	1	35432	0	0	0	0	1	0	0	0	0	HPRC_PLUS	male	3140		EUR	PGP - Ashkenazim Jewish	HG002	HG002 1 JAHKSE010000176.1	568	0.55	0.882	0.838	0.545	TRUE	508	SD and High GA/TC (80%)	SD and High GA/TC (80%)
chr22	5595694	5595695	51324926	+	1	JAHKSE010000423.1	0	1	39110	0	0	0	0	1	0	0	0	0	HPRC_PLUS	male	3140		EUR	PGP - Ashkenazim Jewish	HG002	HG002 1 JAHKSE010000423.1	569	0.55	0.882	0.838	0.545	TRUE	508	SD and High GA/TC (80%)	SD and High GA/TC (80%)
chr22	5595936	5595937	51324926	-	1	JAHKSE010000317.1	28145	28146	28146	0	0	0	0	1	0	0	0	0	HPRC_PLUS	male	3140		EUR	PGP - Ashkenazim Jewish	HG002	HG002 1 JAHKSE010000317.1	570	0.55	0.882	0.838	0.545	TRUE	508	SD and High GA/TC (80%)	SD and High GA/TC (80%)
chr22	5596725	5596726	51324926	+	1	JAHKSE010000569.1	0	1	38548	0	0	0	0	1	0	0	0	0	HPRC_PLUS	male	3140		EUR	PGP - Ashkenazim Jewish	HG002	HG002 1 JAHKSE010000569.1	571	0.55	0.882	0.838	0.545	TRUE	510	SD and High GA/TC (80%)	SD and High GA/TC (80%)
chr22	5597310	5597311	51324926	+	1	JAHKSE010000364.1	0	1	29111	0	0	0	0	1	0	0	0	0	HPRC_PLUS	male	3140		EUR	PGP - Ashkenazim Jewish	HG002	HG002 1 JAHKSE010000364.1	572	0.55	0.882	0.812	0.545	TRUE	509	SD and High GA/TC (80%)	SD and High GA/TC (80%)
chr22	5597331	5597332	51324926	-	1	JAHKSE010000147.1	54695	54696	54696	0	0	0	0	1	0	0	0	0	HPRC_PLUS	male	3140		EUR	PGP - Ashkenazim Jewish	HG002	HG002 1 JAHKSE010000147.1	573	0.55	0.882	0.812	0.545	TRUE	509	SD and High GA/TC (80%)	SD and High GA/TC (80%)
chr22	5600513	5600514	51324926	-	1	JAHKSE010000509.1	31382	31383	31383	0	0	0	0	1	0	0	0	0	HPRC_PLUS	male	3140		EUR	PGP - Ashkenazim Jewish	HG002	HG002 1 JAHKSE010000509.1	574	0.536	0.882	0.8	0.545	TRUE	511	SD and High GA/TC (80%)	SD and High GA/TC (80%)
chr22	5605218	5605219	51324926	-	1	JAHKSE010000337.1	28293	28294	28294	0	0	0	0	1	0	0	0	0	HPRC_PLUS	male	3140		EUR	PGP - Ashkenazim Jewish	HG002	HG002 1 JAHKSE010000337.1	575	0.535	0.882	0.606	0.624	TRUE	500	SD and High GA/TC (80%)	SD and High GA/TC (80%)
chr22	5624036	5624037	51324926	-	1	JAHKSE010000317.1	0	1	28146	0	0	0	0	1	0	0	0	0	HPRC_PLUS	male	3140		EUR	PGP - Ashkenazim Jewish	HG002	HG002 1 JAHKSE010000317.1	576	0.595	0.804	0.843	0.588	TRUE	407	SD and High GA/TC (80%)	SD and High GA/TC (80%)
chr22	5624952	5624953	51324926	+	1	JAHKSE010000013.1	0	1	8544677	0	0	0	0	1	0	0	0	0	HPRC_PLUS	male	3140		EUR	PGP - Ashkenazim Jewish	HG002	HG002 1 JAHKSE010000013.1	577	0.595	0.804	0.843	0.587	TRUE	406	SD and High GA/TC (80%)	SD and High GA/TC (80%)
chr22	5625401	5625402	51324926	-	1	JAHKSE010000525.1	0	1	30166	0	0	0	0	1	0	0	0	0	HPRC_PLUS	male	3140		EUR	PGP - Ashkenazim Jewish	HG002	HG002 1 JAHKSE010000525.1	578	0.595	0.804	0.843	0.587	TRUE	405	SD and High GA/TC (80%)	SD and High GA/TC (80%)
chr22	5625694	5625695	51324926	+	1	JAHKSE010000572.1	33027	33028	33028	0	0	0	0	1	0	0	0	0	HPRC_PLUS	male	3140		EUR	PGP - Ashkenazim Jewish	HG002	HG002 1 JAHKSE010000572.1	579	0.595	0.804	0.843	0.587	TRUE	404	SD and High GA/TC (80%)	SD and High GA/TC (80%)
chr22	5626387	5626388	51324926	+	1	JAHKSE010000364.1	29110	29111	29111	0	0	0	0	1	0	0	0	0	HPRC_PLUS	male	3140		EUR	PGP - Ashkenazim Jewish	HG002	HG002 1 JAHKSE010000364.1	580	0.595	0.804	0.843	0.587	TRUE	404	SD and High GA/TC (80%)	SD and High GA/TC (80%)
chr22	5627473	5627474	51324926	-	1	JAHKSE010000137.1	0	1	34681	0	0	0	0	1	0	0	0	0	HPRC_PLUS	male	3140		EUR	PGP - Ashkenazim Jewish	HG002	HG002 1 JAHKSE010000137.1	581	0.595	0.804	0.843	0.587	TRUE	403	SD and High GA/TC (80%)	SD and High GA/TC (80%)
chr22	5629541	5629542	51324926	+	1	JAHKSE010000255.1	268951	268952	268952	0	0	0	0	1	0	0	0	0	HPRC_PLUS	male	3140		EUR	PGP - Ashkenazim Jewish	HG002	HG002 1 JAHKSE010000255.1	582	0.595	0.804	0.843	0.587	TRUE	398	SD and High GA/TC (80%)	SD and High GA/TC (80%)
chr22	5630030	5630031	51324926	+	1	JAHKSE010000373.1	35193	35194	35194	0	0	0	0	1	0	0	0	0	HPRC_PLUS	male	3140		EUR	PGP - Ashkenazim Jewish	HG002	HG002 1 JAHKSE010000373.1	583	0.561	0.804	0.843	0.587	TRUE	397	SD and High GA/TC (80%)	SD and High GA/TC (80%)
chr22	5630362	5630363	51324926	-	1	JAHKSE010000048.1	0	1	35410	0	0	0	0	1	0	0	0	0	HPRC_PLUS	male	3140		EUR	PGP - Ashkenazim Jewish	HG002	HG002 1 JAHKSE010000048.1	584	0.555	0.804	0.843	0.587	TRUE	397	SD and High GA/TC (80%)	SD and High GA/TC (80%)
chr22	5630812	5630813	51324926	+	1	JAHKSE010000363.1	37332	37333	37333	0	0	0	0	1	0	0	0	0	HPRC_PLUS	male	3140		EUR	PGP - Ashkenazim Jewish	HG002	HG002 1 JAHKSE010000363.1	585	0.555	0.804	0.843	0.587	TRUE	398	SD and High GA/TC (80%)	SD and High GA/TC (80%)
chr22	5631057	5631058	51324926	+	1	JAHKSE010000176.1	35431	35432	35432	0	0	0	0	1	0	0	0	0	HPRC_PLUS	male	3140		EUR	PGP - Ashkenazim Jewish	HG002	HG002 1 JAHKSE010000176.1	586	0.555	0.804	0.843	0.587	TRUE	398	SD and High GA/TC (80%)	SD and High GA/TC (80%)
chr22	5631879	5631880	51324926	-	1	JAHKSE010000509.1	0	1	31383	0	0	0	0	1	0	0	0	0	HPRC_PLUS	male	3140		EUR	PGP - Ashkenazim Jewish	HG002	HG002 1 JAHKSE010000509.1	587	0.555	0.739	0.843	0.583	TRUE	398	SD	SD and High GA/TC (80%)
chr22	5633506	5633507	51324926	-	1	JAHKSE010000337.1	0	1	28294	0	0	0	0	1	0	0	0	0	HPRC_PLUS	male	3140		EUR	PGP - Ashkenazim Jewish	HG002	HG002 1 JAHKSE010000337.1	588	0.555	0.739	0.843	0.529	TRUE	392	SD	SD and High GA/TC (80%)
chr22	5634196	5634197	51324926	+	1	JAHKSE010000457.1	40491	40492	40492	0	0	0	0	1	0	0	0	0	HPRC_PLUS	male	3140		EUR	PGP - Ashkenazim Jewish	HG002	HG002 1 JAHKSE010000457.1	589	0.555	0.739	0.843	0.529	TRUE	386	SD	SD and High GA/TC (80%)
chr22	5634748	5634749	51324926	+	1	JAHKSE010000423.1	39109	39110	39110	0	0	0	0	1	0	0	0	0	HPRC_PLUS	male	3140		EUR	PGP - Ashkenazim Jewish	HG002	HG002 1 JAHKSE010000423.1	590	0.555	0.739	0.843	0.535	TRUE	386	SD	SD and High GA/TC (80%)
chr22	5635207	5635208	51324926	+	1	JAHKSE010000569.1	38547	38548	38548	0	0	0	0	1	0	0	0	0	HPRC_PLUS	male	3140		EUR	PGP - Ashkenazim Jewish	HG002	HG002 1 JAHKSE010000569.1	591	0.555	0.88	0.843	0.54	TRUE	385	SD and High GA/TC (80%)	SD and High GA/TC (80%)
chr22	5652306	5652307	51324926	-	1	JAHKSE010000147.1	0	1	54696	0	0	0	0	1	0	0	0	0	HPRC_PLUS	male	3140		EUR	PGP - Ashkenazim Jewish	HG002	HG002 1 JAHKSE010000147.1	592	0.538	0.884	0.605	0.623	TRUE	307	SD and High GA/TC (80%)	SD and High GA/TC (80%)
chr22	5683061	5683062	51324926	+	1	JAHKSE010000155.1	231947	231948	231948	0	0	0	0	1	0	0	0	0	HPRC_PLUS	male	3140		EUR	PGP - Ashkenazim Jewish	HG002	HG002 1 JAHKSE010000155.1	593	0.556	0.884	0.837	0.544	TRUE	268	SD and High GA/TC (80%)	SD and High GA/TC (80%)
chr22	5691286	5691287	51324926	-	1	JAHKSE010000073.1	8326708	8326709	8326725	0	0	0	0	1	0	0	0	0	HPRC_PLUS	male	3140		EUR	PGP - Ashkenazim Jewish	HG002	HG002 1 JAHKSE010000073.1	594	0.536	0.884	0.781	0.544	TRUE	256	SD and High GA/TC (80%)	SD and High GA/TC (80%)
chr22	6732544	6732545	51324926	+	1	JAHKSE010000283.1	936	937	536541	0	0	0	0	1	0	0	0	0	HPRC_PLUS	male	3140		EUR	PGP - Ashkenazim Jewish	HG002	HG002 1 JAHKSE010000283.1	595	0.604	0.539	0.396	0.904	TRUE	86	SD	SD and High GA/TC (80%)
chr22	6740083	6740084	51324926	-	1	JAHKSE010000156.1	2429412	2429413	2429413	0	0	0	0	1	0	0	0	0	HPRC_PLUS	male	3140		EUR	PGP - Ashkenazim Jewish	HG002	HG002 1 JAHKSE010000156.1	596	0.539	0.539	0.399	0.886	TRUE	87	SD	SD and High GA/TC (80%)
chr22	6876129	6876130	51324926	-	1	JAHKSE010000366.1	564844	564845	564845	0	0	0	0	1	0	0	0	0	HPRC_PLUS	male	3140		EUR	PGP - Ashkenazim Jewish	HG002	HG002 1 JAHKSE010000366.1	597	0.538	0.54	0.399	0.88	TRUE	135	SD	SD and High GA/TC (80%)
chr22	6882378	6882379	51324926	+	1	JAHKSE010000209.1	0	1	1408480	0	0	0	0	1	0	0	0	0	HPRC_PLUS	male	3140		EUR	PGP - Ashkenazim Jewish	HG002	HG002 1 JAHKSE010000209.1	598	0.539	0.539	0.399	0.879	TRUE	138	SD	SD and High GA/TC (80%)
chr22	6947804	6947805	51324926	-	1	JAHKSE010000333.1	133417	133418	133931	0	0	0	0	1	0	0	0	0	HPRC_PLUS	male	3140		EUR	PGP - Ashkenazim Jewish	HG002	HG002 1 JAHKSE010000333.1	599	0.535	0.538	0.4	0.881	TRUE	136	SD	SD and High GA/TC (80%)
chr22	7074570	7074571	51324926	+	1	JAHKSE010000428.1	300782	300783	300827	0	0	0	0	1	0	0	0	0	HPRC_PLUS	male	3140		EUR	PGP - Ashkenazim Jewish	HG002	HG002 1 JAHKSE010000428.1	600	0.537	0.538	0.402	0.893	TRUE	180	10% Low Complexity	Satellite
chr22	7079505	7079506	51324926	-	1	JAHKSE010000421.1	22	23	297359	0	0	0	0	1	0	0	0	0	HPRC_PLUS	male	3140		EUR	PGP - Ashkenazim Jewish	HG002	HG002 1 JAHKSE010000421.1	601	0.537	0.538	0.405	0.893	TRUE	173	10% Low Complexity	Satellite
chr22	7081468	7081469	51324926	-	1	JAHKSE010000333.1	0	1	133931	0	0	0	0	1	0	0	0	0	HPRC_PLUS	male	3140		EUR	PGP - Ashkenazim Jewish	HG002	HG002 1 JAHKSE010000333.1	602	0.536	0.538	0.405	0.899	TRUE	172	10% Low Complexity	Satellite
chr22	7083647	7083648	51324926	-	1	JAHKSE010000366.1	0	1	564845	0	0	0	0	1	0	0	0	0	HPRC_PLUS	male	3140		EUR	PGP - Ashkenazim Jewish	HG002	HG002 1 JAHKSE010000366.1	603	0.538	0.538	0.405	0.899	TRUE	172	10% Low Complexity	Satellite
chr22	8724045	8724046	51324926	-	1	JAHKSE010000154.1	0	1	3245339	100	100	100	1	0	0	0	0	0	HPRC_PLUS	male	3140		EUR	PGP - Ashkenazim Jewish	HG002	HG002 1 JAHKSE010000154.1	604	0.507	0.526	0.401	0.644	TRUE	19	SD	SD and High GA/TC (80%)
chr22	10588390	10588391	51324926	-	1	JAHKSE010000065.1	40413460	40413461	40413461	0	0	0	0	1	0	0	0	0	HPRC_PLUS	male	3140		EUR	PGP - Ashkenazim Jewish	HG002	HG002 1 JAHKSE010000065.1	605	0.606	0.627	0.436	0.736	TRUE	3	SD	SD and High GA/TC (80%)
chr22	16422389	16422390	51324926	+	1	JAHKSE010000099.1	2590925	2590926	2590926	0	0	0	0	1	0	0	0	0	HPRC_PLUS	male	3140		EUR	PGP - Ashkenazim Jewish	HG002	HG002 1 JAHKSE010000099.1	606	0.578	0.625	0.635	0.728	FALSE	9	SD	SD and High GA/TC (80%)
chr22	21804710	21804711	51324926	+	1	JAHKSE010000527.1	0	1	42304	0	0	0	0	1	0	0	0	0	HPRC_PLUS	male	3140		EUR	PGP - Ashkenazim Jewish	HG002	HG002 1 JAHKSE010000527.1	607	0.596	0.611	0.72	0.553	FALSE	58	SD	SD and High GA/TC (80%)
chr22	21847011	21847012	51324926	+	1	JAHKSE010000527.1	42303	42304	42304	0	0	0	0	1	0	0	0	0	HPRC_PLUS	male	3140		EUR	PGP - Ashkenazim Jewish	HG002	HG002 1 JAHKSE010000527.1	608	0.558	0.593	0.655	0.547	FALSE	24	SD	SD and High GA/TC (80%)
chr22	51324925	51324926	51324926	-	1	JAHKSE010000065.1	1546	1547	40413461	0	0	0	0	1	0	0	0	0	HPRC_PLUS	male	3140		EUR	PGP - Ashkenazim Jewish	HG002	HG002 1 JAHKSE010000065.1	609	0.684	0.565	0.743	0.668	FALSE	94	Chromosome end	Chromosome end or Poisson
chr3	1	2	201105948	+	1	JAHKSE010000053.1	6236	6237	91894130	0	0	0	0	1	0	0	0	0	HPRC_PLUS	male	3140		EUR	PGP - Ashkenazim Jewish	HG002	HG002 1 JAHKSE010000053.1	610	0.613	0.68	0.785	0.686	FALSE	94	Chromosome end	Chromosome end or Poisson
chr3	68431437	68431438	201105948	-	1	JAHKSE010000404.1	26995	26996	26996	0	0	0	0	1	0	0	0	0	HPRC_PLUS	male	3140		EUR	PGP - Ashkenazim Jewish	HG002	HG002 1 JAHKSE010000404.1	611	0.629	0.613	0.55	0.699	FALSE	2	Poisson breaks	Chromosome end or Poisson
chr3	68458432	68458433	201105948	-	1	JAHKSE010000404.1	0	1	26996	0	0	0	0	1	0	0	0	0	HPRC_PLUS	male	3140		EUR	PGP - Ashkenazim Jewish	HG002	HG002 1 JAHKSE010000404.1	612	0.58	0.589	0.478	0.691	FALSE	2	Poisson breaks	Chromosome end or Poisson
chr3	91839205	91839206	201105948	+	1	JAHKSE010000312.1	0	1	107296	0	0	0	0	1	0	0	0	0	HPRC_PLUS	male	3140		EUR	PGP - Ashkenazim Jewish	HG002	HG002 1 JAHKSE010000312.1	613	0.514	0.515	0.393	0.628	FALSE	15	Alpha	Satellite
chr3	91875298	91875299	201105948	+	1	JAHKSE010000053.1	91894129	91894130	91894130	0	0	0	0	1	0	0	0	0	HPRC_PLUS	male	3140		EUR	PGP - Ashkenazim Jewish	HG002	HG002 1 JAHKSE010000053.1	614	0.513	0.515	0.394	0.631	FALSE	16	Alpha	Satellite
chr3	91941349	91941350	201105948	-	1	JAHKSE010000294.1	638684	638685	638685	0	0	0	0	1	0	0	0	0	HPRC_PLUS	male	3140		EUR	PGP - Ashkenazim Jewish	HG002	HG002 1 JAHKSE010000294.1	615	0.512	0.517	0.393	0.628	FALSE	25	Alpha	Satellite
chr3	91945129	91945130	201105948	+	1	JAHKSE010000312.1	107295	107296	107296	0	0	0	0	1	0	0	0	0	HPRC_PLUS	male	3140		EUR	PGP - Ashkenazim Jewish	HG002	HG002 1 JAHKSE010000312.1	616	0.512	0.517	0.393	0.628	FALSE	24	Alpha	Satellite
chr3	91964021	91964022	201105948	-	1	JAHKSE010000432.1	0	1	174789	0	0	0	0	1	0	0	0	0	HPRC_PLUS	male	3140		EUR	PGP - Ashkenazim Jewish	HG002	HG002 1 JAHKSE010000432.1	617	0.515	0.516	0.391	0.628	FALSE	25	Alpha	Satellite
chr3	92016908	92016909	201105948	-	1	JAHKSE010000432.1	174788	174789	174789	0	0	0	0	1	0	0	0	0	HPRC_PLUS	male	3140		EUR	PGP - Ashkenazim Jewish	HG002	HG002 1 JAHKSE010000432.1	618	0.512	0.515	0.393	0.632	FALSE	27	Alpha	Satellite
chr3	92103235	92103236	201105948	+	1	JAHKSE010000030.1	77	78	450761	0	0	0	0	1	0	0	0	0	HPRC_PLUS	male	3140		EUR	PGP - Ashkenazim Jewish	HG002	HG002 1 JAHKSE010000030.1	619	0.511	0.517	0.393	0.628	FALSE	90	Alpha	Satellite
chr3	92140340	92140341	201105948	-	1	JAHKSE010000456.1	309861	309862	309862	0	0	0	0	1	0	0	0	0	HPRC_PLUS	male	3140		EUR	PGP - Ashkenazim Jewish	HG002	HG002 1 JAHKSE010000456.1	620	0.512	0.512	0.395	0.627	FALSE	372	Alpha	Satellite
chr3	92340581	92340582	201105948	-	1	JAHKSE010000434.1	68908	68909	68909	0	0	0	0	1	0	0	0	0	HPRC_PLUS	male	3140		EUR	PGP - Ashkenazim Jewish	HG002	HG002 1 JAHKSE010000434.1	621	0.511	0.514	0.394	0.625	FALSE	664	Alpha	Satellite
chr3	92409441	92409442	201105948	-	1	JAHKSE010000434.1	0	1	68909	0	0	0	0	1	0	0	0	0	HPRC_PLUS	male	3140		EUR	PGP - Ashkenazim Jewish	HG002	HG002 1 JAHKSE010000434.1	622	0.512	0.512	0.394	0.626	FALSE	504	Alpha	Satellite
chr3	92455336	92455337	201105948	-	1	JAHKSE010000456.1	0	1	309862	0	0	0	0	1	0	0	0	0	HPRC_PLUS	male	3140		EUR	PGP - Ashkenazim Jewish	HG002	HG002 1 JAHKSE010000456.1	623	0.515	0.511	0.394	0.63	FALSE	558	Alpha	Satellite
chr3	92475634	92475635	201105948	+	1	JAHKSE010000501.1	0	1	62279	0	0	0	0	1	0	0	0	0	HPRC_PLUS	male	3140		EUR	PGP - Ashkenazim Jewish	HG002	HG002 1 JAHKSE010000501.1	624	0.513	0.512	0.394	0.63	FALSE	508	Alpha	Satellite
chr3	92503052	92503053	201105948	+	1	JAHKSE010000114.1	0	1	29480	0	0	0	0	1	0	0	0	0	HPRC_PLUS	male	3140		EUR	PGP - Ashkenazim Jewish	HG002	HG002 1 JAHKSE010000114.1	625	0.516	0.514	0.394	0.631	FALSE	498	Alpha	Satellite
chr3	92533211	92533212	201105948	+	1	JAHKSE010000114.1	29479	29480	29480	0	0	0	0	1	0	0	0	0	HPRC_PLUS	male	3140		EUR	PGP - Ashkenazim Jewish	HG002	HG002 1 JAHKSE010000114.1	626	0.513	0.512	0.394	0.628	FALSE	409	Alpha	Satellite
chr3	92540281	92540282	201105948	+	1	JAHKSE010000501.1	62278	62279	62279	0	0	0	0	1	0	0	0	0	HPRC_PLUS	male	3140		EUR	PGP - Ashkenazim Jewish	HG002	HG002 1 JAHKSE010000501.1	627	0.513	0.512	0.394	0.628	FALSE	396	Alpha	Satellite
chr3	92548358	92548359	201105948	+	1	JAHKSE010000030.1	447057	447058	450761	0	0	0	0	1	0	0	0	0	HPRC_PLUS	male	3140		EUR	PGP - Ashkenazim Jewish	HG002	HG002 1 JAHKSE010000030.1	628	0.512	0.512	0.393	0.63	FALSE	381	Alpha	Satellite
chr3	92562339	92562340	201105948	+	1	JAHKSE010000578.1	0	1	25985	0	0	0	0	1	0	0	0	0	HPRC_PLUS	male	3140		EUR	PGP - Ashkenazim Jewish	HG002	HG002 1 JAHKSE010000578.1	629	0.513	0.513	0.396	0.634	FALSE	369	Alpha	Satellite
chr3	92585486	92585487	201105948	-	1	JAHKSE010000294.1	0	1	638685	0	0	0	0	1	0	0	0	0	HPRC_PLUS	male	3140		EUR	PGP - Ashkenazim Jewish	HG002	HG002 1 JAHKSE010000294.1	630	0.529	0.513	0.395	0.715	FALSE	340	Alpha	Satellite
chr3	92588675	92588676	201105948	+	1	JAHKSE010000578.1	25984	25985	25985	0	0	0	0	1	0	0	0	0	HPRC_PLUS	male	3140		EUR	PGP - Ashkenazim Jewish	HG002	HG002 1 JAHKSE010000578.1	631	0.551	0.513	0.395	0.791	FALSE	330	Alpha	Satellite
chr3	96384531	96384532	201105948	+	1	JAHKSE010000005.1	0	1	104825690	0	0	0	0	1	0	0	0	0	HPRC_PLUS	male	3140		EUR	PGP - Ashkenazim Jewish	HG002	HG002 1 JAHKSE010000005.1	632	0.511	0.512	0.398	0.625	FALSE	34	Alpha	Satellite
chr3	96398285	96398286	201105948	+	1	JAHKSE010000034.1	5919013	5919014	5919014	0	0	0	0	1	0	0	0	0	HPRC_PLUS	male	3140		EUR	PGP - Ashkenazim Jewish	HG002	HG002 1 JAHKSE010000034.1	633	0.511	0.512	0.394	0.626	FALSE	31	Alpha	Satellite
chr3	201088875	201088876	201105948	+	1	JAHKSE010000005.1	104822375	104822376	104825690	0	0	0	0	1	0	0	0	0	HPRC_PLUS	male	3140		EUR	PGP - Ashkenazim Jewish	HG002	HG002 1 JAHKSE010000005.1	634	0.598	0.575	0.738	0.667	FALSE	133	Chromosome end	Chromosome end or Poisson
chr4	9	10	193574945	+	1	JAHKSE010000016.1	4264	4265	183079594	0	0	0	0	1	0	0	0	0	HPRC_PLUS	male	3140		EUR	PGP - Ashkenazim Jewish	HG002	HG002 1 JAHKSE010000016.1	635	0.65	0.708	0.797	0.662	FALSE	123	Chromosome end	Chromosome end or Poisson
chr4	19406	19407	193574945	-	1	JAHKSE010000075.1	9154759	9154760	9170215	0	0	0	0	1	0	0	0	0	HPRC_PLUS	male	3140		EUR	PGP - Ashkenazim Jewish	HG002	HG002 1 JAHKSE010000075.1	636	0.588	0.599	0.502	0.704	FALSE	124	Chromosome end	Chromosome end or Poisson
chr4	9144962	9144963	193574945	-	1	JAHKSE010000075.1	0	1	9170215	0	0	0	0	1	0	0	0	0	HPRC_PLUS	male	3140		EUR	PGP - Ashkenazim Jewish	HG002	HG002 1 JAHKSE010000075.1	637	0.545	0.574	0.537	0.576	FALSE	12	SD	SD and High GA/TC (80%)
chr4	9186033	9186034	193574945	-	1	JAHKSE010000016.1	183079593	183079594	183079594	0	0	0	0	1	0	0	0	0	HPRC_PLUS	male	3140		EUR	PGP - Ashkenazim Jewish	HG002	HG002 1 JAHKSE010000016.1	638	0.548	0.578	0.536	0.577	FALSE	14	SD	SD and High GA/TC (80%)
chr4	50267426	50267427	193574945	+	1	JAHKSE010000487.1	0	1	39587	0	0	0	0	1	0	0	0	0	HPRC_PLUS	male	3140		EUR	PGP - Ashkenazim Jewish	HG002	HG002 1 JAHKSE010000487.1	639	0.524	0.503	0.39	0.642	FALSE	295	Alpha	Satellite
chr4	50270433	50270434	193574945	+	1	JAHKSE010000464.1	0	1	60526	0	0	0	0	1	0	0	0	0	HPRC_PLUS	male	3140		EUR	PGP - Ashkenazim Jewish	HG002	HG002 1 JAHKSE010000464.1	640	0.524	0.503	0.39	0.642	FALSE	299	Alpha	Satellite
chr4	50270478	50270479	193574945	+	1	JAHKSE010000420.1	0	1	77504	0	0	0	0	1	0	0	0	0	HPRC_PLUS	male	3140		EUR	PGP - Ashkenazim Jewish	HG002	HG002 1 JAHKSE010000420.1	641	0.524	0.503	0.39	0.642	FALSE	299	Alpha	Satellite
chr4	50271367	50271368	193574945	+	1	JAHKSE010000490.1	0	1	46420	0	0	0	0	1	0	0	0	0	HPRC_PLUS	male	3140		EUR	PGP - Ashkenazim Jewish	HG002	HG002 1 JAHKSE010000490.1	642	0.523	0.503	0.39	0.642	FALSE	299	Alpha	Satellite
chr4	50283820	50283821	193574945	-	1	JAHKSE010000492.1	53935	53936	55203	0	0	0	0	1	0	0	0	0	HPRC_PLUS	male	3140		EUR	PGP - Ashkenazim Jewish	HG002	HG002 1 JAHKSE010000492.1	643	0.524	0.499	0.391	0.642	FALSE	309	Alpha	Satellite
chr4	50307032	50307033	193574945	+	1	JAHKSE010000487.1	39586	39587	39587	0	0	0	0	1	0	0	0	0	HPRC_PLUS	male	3140		EUR	PGP - Ashkenazim Jewish	HG002	HG002 1 JAHKSE010000487.1	644	0.523	0.502	0.387	0.639	FALSE	326	Alpha	Satellite
chr4	50317979	50317980	193574945	+	1	JAHKSE010000490.1	46419	46420	46420	0	0	0	0	1	0	0	0	0	HPRC_PLUS	male	3140		EUR	PGP - Ashkenazim Jewish	HG002	HG002 1 JAHKSE010000490.1	645	0.527	0.5	0.391	0.638	FALSE	333	Alpha	Satellite
chr4	50330999	50331000	193574945	+	1	JAHKSE010000464.1	60525	60526	60526	0	0	0	0	1	0	0	0	0	HPRC_PLUS	male	3140		EUR	PGP - Ashkenazim Jewish	HG002	HG002 1 JAHKSE010000464.1	646	0.525	0.5	0.389	0.638	FALSE	341	Alpha	Satellite
chr4	50342722	50342723	193574945	-	1	JAHKSE010000492.1	0	1	55203	0	0	0	0	1	0	0	0	0	HPRC_PLUS	male	3140		EUR	PGP - Ashkenazim Jewish	HG002	HG002 1 JAHKSE010000492.1	647	0.527	0.5	0.39	0.638	FALSE	356	Alpha	Satellite
chr4	50348041	50348042	193574945	+	1	JAHKSE010000420.1	77503	77504	77504	0	0	0	0	1	0	0	0	0	HPRC_PLUS	male	3140		EUR	PGP - Ashkenazim Jewish	HG002	HG002 1 JAHKSE010000420.1	648	0.527	0.5	0.39	0.638	FALSE	356	Alpha	Satellite
chr4	136977404	136977405	193574945	-	1	JAHKSE010000518.1	25993	25994	25994	0	0	0	0	1	0	0	0	0	HPRC_PLUS	male	3140		EUR	PGP - Ashkenazim Jewish	HG002	HG002 1 JAHKSE010000518.1	649	0.601	0.599	0.427	0.764	FALSE	2	Poisson breaks	Chromosome end or Poisson
chr4	137002963	137002964	193574945	-	1	JAHKSE010000518.1	0	1	25994	0	0	0	0	1	0	0	0	0	HPRC_PLUS	male	3140		EUR	PGP - Ashkenazim Jewish	HG002	HG002 1 JAHKSE010000518.1	650	0.564	0.62	0.528	0.756	FALSE	2	Poisson breaks	Chromosome end or Poisson
chr4	193443745	193443746	193574945	+	1	JAHKSE010000276.1	0	1	54986	0	0	0	0	1	0	0	0	0	HPRC_PLUS	male	3140		EUR	PGP - Ashkenazim Jewish	HG002	HG002 1 JAHKSE010000276.1	651	0.556	0.571	0.754	0.421	FALSE	144	Chromosome end	Chromosome end or Poisson
chr4	193498723	193498724	193574945	+	1	JAHKSE010000276.1	54985	54986	54986	0	0	0	0	1	0	0	0	0	HPRC_PLUS	male	3140		EUR	PGP - Ashkenazim Jewish	HG002	HG002 1 JAHKSE010000276.1	652	0.564	0.573	0.753	0.312	FALSE	190	Chromosome end	Chromosome end or Poisson
chr5	0	1	182045439	+	1	JAHKSE010000032.1	8516	8517	47528663	0	0	0	0	1	0	0	0	0	HPRC_PLUS	male	3140		EUR	PGP - Ashkenazim Jewish	HG002	HG002 1 JAHKSE010000032.1	653	0.589	0.682	0.789	0.686	FALSE	100	Chromosome end	Chromosome end or Poisson
chr5	46854294	46854295	182045439	+	1	JAHKSE010000032.1	46872446	46872447	47528663	0	0	0	0	1	0	0	0	0	HPRC_PLUS	male	3140		EUR	PGP - Ashkenazim Jewish	HG002	HG002 1 JAHKSE010000032.1	654	0.513	0.51	0.396	0.626	FALSE	4	Alpha	Satellite
chr5	49299593	49299594	182045439	-	1	JAHKSE010000466.1	81295	81296	102145	0	0	0	0	1	0	0	0	0	HPRC_PLUS	male	3140		EUR	PGP - Ashkenazim Jewish	HG002	HG002 1 JAHKSE010000466.1	655	0.512	0.515	0.4	0.618	FALSE	13	Alpha	Satellite
chr5	49326092	49326093	182045439	-	1	JAHKSE010000316.1	369001	369002	687536	0	0	0	0	1	0	0	0	0	HPRC_PLUS	male	3140		EUR	PGP - Ashkenazim Jewish	HG002	HG002 1 JAHKSE010000316.1	656	0.506	0.518	0.403	0.616	FALSE	142	Alpha	Satellite
chr5	49330325	49330326	182045439	+	1	JAHKSE010000194.1	14496	14497	1582737	0	0	0	0	1	0	0	0	0	HPRC_PLUS	male	3140		EUR	PGP - Ashkenazim Jewish	HG002	HG002 1 JAHKSE010000194.1	657	0.506	0.518	0.403	0.616	FALSE	151	Alpha	Satellite
chr5	49337245	49337246	182045439	-	1	JAHKSE010000466.1	44998	44999	102145	0	0	0	0	1	0	0	0	0	HPRC_PLUS	male	3140		EUR	PGP - Ashkenazim Jewish	HG002	HG002 1 JAHKSE010000466.1	658	0.506	0.518	0.399	0.616	FALSE	157	Alpha	Satellite
chr5	49363767	49363768	182045439	-	1	JAHKSE010000316.1	331999	332000	687536	0	0	0	0	1	0	0	0	0	HPRC_PLUS	male	3140		EUR	PGP - Ashkenazim Jewish	HG002	HG002 1 JAHKSE010000316.1	659	0.506	0.52	0.403	0.618	FALSE	185	Alpha	Satellite
chr5	49407216	49407217	182045439	+	1	JAHKSE010000292.1	10300	10301	291924	0	0	0	0	1	0	0	0	0	HPRC_PLUS	male	3140		EUR	PGP - Ashkenazim Jewish	HG002	HG002 1 JAHKSE010000292.1	660	0.503	0.518	0.404	0.621	FALSE	303	Alpha	Satellite
chr5	49409401	49409402	182045439	-	1	JAHKSE010000220.1	251910	251911	272178	0	0	0	0	1	0	0	0	0	HPRC_PLUS	male	3140		EUR	PGP - Ashkenazim Jewish	HG002	HG002 1 JAHKSE010000220.1	661	0.503	0.518	0.404	0.621	FALSE	303	Alpha	Satellite
chr5	49412872	49412873	182045439	+	1	JAHKSE010000360.1	4928	4929	118933	0	0	0	0	1	0	0	0	0	HPRC_PLUS	male	3140		EUR	PGP - Ashkenazim Jewish	HG002	HG002 1 JAHKSE010000360.1	662	0.502	0.518	0.404	0.621	FALSE	303	Alpha	Satellite
chr5	49413213	49413214	182045439	-	1	JAHKSE010000426.1	158857	158858	218512	0	0	0	0	1	0	0	0	0	HPRC_PLUS	male	3140		EUR	PGP - Ashkenazim Jewish	HG002	HG002 1 JAHKSE010000426.1	663	0.502	0.518	0.404	0.621	FALSE	303	Alpha	Satellite
chr5	49415576	49415577	182045439	+	1	JAHKSE010000352.1	2408	2409	126047	0	0	0	0	1	0	0	0	0	HPRC_PLUS	male	3140		EUR	PGP - Ashkenazim Jewish	HG002	HG002 1 JAHKSE010000352.1	664	0.502	0.518	0.404	0.617	FALSE	303	Alpha	Satellite
chr5	49416880	49416881	182045439	+	1	JAHKSE010000334.1	907	908	62618	0	0	0	0	1	0	0	0	0	HPRC_PLUS	male	3140		EUR	PGP - Ashkenazim Jewish	HG002	HG002 1 JAHKSE010000334.1	665	0.502	0.518	0.404	0.617	FALSE	303	Alpha	Satellite
chr5	49417125	49417126	182045439	+	1	JAHKSE010000222.1	8001	8002	535690	0	0	0	0	1	0	0	0	0	HPRC_PLUS	male	3140		EUR	PGP - Ashkenazim Jewish	HG002	HG002 1 JAHKSE010000222.1	666	0.502	0.518	0.404	0.617	FALSE	303	Alpha	Satellite
chr5	49417134	49417135	182045439	+	1	JAHKSE010000480.1	0	1	146152	0	0	0	0	1	0	0	0	0	HPRC_PLUS	male	3140		EUR	PGP - Ashkenazim Jewish	HG002	HG002 1 JAHKSE010000480.1	667	0.502	0.518	0.404	0.617	FALSE	303	Alpha	Satellite
chr5	49423402	49423403	182045439	+	1	JAHKSE010000022.1	202129	202130	604878	0	0	0	0	1	0	0	0	0	HPRC_PLUS	male	3140		EUR	PGP - Ashkenazim Jewish	HG002	HG002 1 JAHKSE010000022.1	668	0.502	0.519	0.402	0.617	FALSE	304	Alpha	Satellite
chr5	49426120	49426121	182045439	+	1	JAHKSE010000413.1	1777	1778	533317	0	0	0	0	1	0	0	0	0	HPRC_PLUS	male	3140		EUR	PGP - Ashkenazim Jewish	HG002	HG002 1 JAHKSE010000413.1	669	0.502	0.519	0.402	0.619	FALSE	303	Alpha	Satellite
chr5	49427656	49427657	182045439	-	1	JAHKSE010000472.1	105332	105333	231445	0	0	0	0	1	0	0	0	0	HPRC_PLUS	male	3140		EUR	PGP - Ashkenazim Jewish	HG002	HG002 1 JAHKSE010000472.1	670	0.502	0.519	0.402	0.619	FALSE	303	Alpha	Satellite
chr5	49428261	49428262	182045439	+	1	JAHKSE010000071.1	0	1	133453	0	0	0	0	1	0	0	0	0	HPRC_PLUS	male	3140		EUR	PGP - Ashkenazim Jewish	HG002	HG002 1 JAHKSE010000071.1	671	0.502	0.519	0.402	0.619	FALSE	303	Alpha	Satellite
chr5	49428971	49428972	182045439	-	1	JAHKSE010000439.1	111489	111490	135932	0	0	0	0	1	0	0	0	0	HPRC_PLUS	male	3140		EUR	PGP - Ashkenazim Jewish	HG002	HG002 1 JAHKSE010000439.1	672	0.502	0.519	0.402	0.619	FALSE	303	Alpha	Satellite
chr5	49429629	49429630	182045439	-	1	JAHKSE010000239.1	229700	229701	245454	0	0	0	0	1	0	0	0	0	HPRC_PLUS	male	3140		EUR	PGP - Ashkenazim Jewish	HG002	HG002 1 JAHKSE010000239.1	673	0.502	0.519	0.402	0.619	FALSE	303	Alpha	Satellite
chr5	49432680	49432681	182045439	-	1	JAHKSE010000162.1	23139845	23139846	23139846	0	0	0	0	1	0	0	0	0	HPRC_PLUS	male	3140		EUR	PGP - Ashkenazim Jewish	HG002	HG002 1 JAHKSE010000162.1	674	0.502	0.521	0.402	0.619	FALSE	301	Alpha	Satellite
chr5	49439730	49439731	182045439	-	1	JAHKSE010000444.1	64142	64143	64143	0	0	0	0	1	0	0	0	0	HPRC_PLUS	male	3140		EUR	PGP - Ashkenazim Jewish	HG002	HG002 1 JAHKSE010000444.1	675	0.502	0.521	0.403	0.619	FALSE	300	Alpha	Satellite
chr5	49457337	49457338	182045439	+	1	JAHKSE010000222.1	535689	535690	535690	0	0	0	0	1	0	0	0	0	HPRC_PLUS	male	3140		EUR	PGP - Ashkenazim Jewish	HG002	HG002 1 JAHKSE010000222.1	676	0.503	0.517	0.403	0.619	FALSE	298	Alpha	Satellite
chr5	49462331	49462332	182045439	+	1	JAHKSE010000360.1	118929	118930	118933	0	0	0	0	1	0	0	0	0	HPRC_PLUS	male	3140		EUR	PGP - Ashkenazim Jewish	HG002	HG002 1 JAHKSE010000360.1	677	0.504	0.518	0.403	0.619	FALSE	299	Alpha	Satellite
chr5	49467054	49467055	182045439	+	1	JAHKSE010000194.1	1582736	1582737	1582737	0	0	0	0	1	0	0	0	0	HPRC_PLUS	male	3140		EUR	PGP - Ashkenazim Jewish	HG002	HG002 1 JAHKSE010000194.1	678	0.504	0.518	0.403	0.616	FALSE	297	Alpha	Satellite
chr5	49469220	49469221	182045439	-	1	JAHKSE010000444.1	0	1	64143	0	0	0	0	1	0	0	0	0	HPRC_PLUS	male	3140		EUR	PGP - Ashkenazim Jewish	HG002	HG002 1 JAHKSE010000444.1	679	0.504	0.518	0.402	0.616	FALSE	297	Alpha	Satellite
chr5	49470232	49470233	182045439	+	1	JAHKSE010000352.1	126039	126040	126047	0	0	0	0	1	0	0	0	0	HPRC_PLUS	male	3140		EUR	PGP - Ashkenazim Jewish	HG002	HG002 1 JAHKSE010000352.1	680	0.504	0.518	0.402	0.616	FALSE	296	Alpha	Satellite
chr5	49470878	49470879	182045439	+	1	JAHKSE010000480.1	146151	146152	146152	0	0	0	0	1	0	0	0	0	HPRC_PLUS	male	3140		EUR	PGP - Ashkenazim Jewish	HG002	HG002 1 JAHKSE010000480.1	681	0.504	0.518	0.402	0.616	FALSE	296	Alpha	Satellite
chr5	49471811	49471812	182045439	+	1	JAHKSE010000292.1	191775	191776	291924	0	0	0	0	1	0	0	0	0	HPRC_PLUS	male	3140		EUR	PGP - Ashkenazim Jewish	HG002	HG002 1 JAHKSE010000292.1	682	0.504	0.518	0.402	0.616	FALSE	296	Alpha	Satellite
chr5	49473965	49473966	182045439	-	1	JAHKSE010000239.1	19572	19573	245454	0	0	0	0	1	0	0	0	0	HPRC_PLUS	male	3140		EUR	PGP - Ashkenazim Jewish	HG002	HG002 1 JAHKSE010000239.1	683	0.504	0.518	0.402	0.615	FALSE	296	Alpha	Satellite
chr5	49474305	49474306	182045439	-	1	JAHKSE010000220.1	5259	5260	272178	0	0	0	0	1	0	0	0	0	HPRC_PLUS	male	3140		EUR	PGP - Ashkenazim Jewish	HG002	HG002 1 JAHKSE010000220.1	684	0.504	0.518	0.402	0.615	FALSE	296	Alpha	Satellite
chr5	49474305	49474306	182045439	-	1	JAHKSE010000472.1	2643	2644	231445	0	0	0	0	1	0	0	0	0	HPRC_PLUS	male	3140		EUR	PGP - Ashkenazim Jewish	HG002	HG002 1 JAHKSE010000472.1	685	0.504	0.518	0.402	0.615	FALSE	296	Alpha	Satellite
chr5	49474305	49474306	182045439	+	1	JAHKSE010000334.1	60040	60041	62618	0	0	0	0	1	0	0	0	0	HPRC_PLUS	male	3140		EUR	PGP - Ashkenazim Jewish	HG002	HG002 1 JAHKSE010000334.1	686	0.504	0.518	0.402	0.615	FALSE	296	Alpha	Satellite
chr5	49474305	49474306	182045439	+	1	JAHKSE010000413.1	528932	528933	533317	0	0	0	0	1	0	0	0	0	HPRC_PLUS	male	3140		EUR	PGP - Ashkenazim Jewish	HG002	HG002 1 JAHKSE010000413.1	687	0.504	0.518	0.402	0.615	FALSE	296	Alpha	Satellite
chr5	49474305	49474306	182045439	+	1	JAHKSE010000022.1	350863	350864	604878	0	0	0	0	1	0	0	0	0	HPRC_PLUS	male	3140		EUR	PGP - Ashkenazim Jewish	HG002	HG002 1 JAHKSE010000022.1	688	0.504	0.518	0.402	0.615	FALSE	296	Alpha	Satellite
chr5	49474906	49474907	182045439	-	1	JAHKSE010000439.1	7136	7137	135932	0	0	0	0	1	0	0	0	0	HPRC_PLUS	male	3140		EUR	PGP - Ashkenazim Jewish	HG002	HG002 1 JAHKSE010000439.1	689	0.504	0.518	0.402	0.615	FALSE	296	Alpha	Satellite
chr5	49475248	49475249	182045439	+	1	JAHKSE010000071.1	129863	129864	133453	0	0	0	0	1	0	0	0	0	HPRC_PLUS	male	3140		EUR	PGP - Ashkenazim Jewish	HG002	HG002 1 JAHKSE010000071.1	690	0.504	0.518	0.402	0.615	FALSE	296	Alpha	Satellite
chr5	49478936	49478937	182045439	-	1	JAHKSE010000426.1	51	52	218512	0	0	0	0	1	0	0	0	0	HPRC_PLUS	male	3140		EUR	PGP - Ashkenazim Jewish	HG002	HG002 1 JAHKSE010000426.1	691	0.505	0.518	0.401	0.615	FALSE	296	Alpha	Satellite
chr5	71636715	71636716	182045439	+	1	JAHKSE010000162.1	0	1	23139846	100	100	100	1	0	0	0	0	0	HPRC_PLUS	male	3140		EUR	PGP - Ashkenazim Jewish	HG002	HG002 1 JAHKSE010000162.1	692	0.598	0.599	0.464	0.729	FALSE	71	SD	SD and High GA/TC (80%)
chr5	71663167	71663168	182045439	-	1	JAHKSE010000037.1	110363106	110363107	110363107	0	0	0	0	1	0	0	0	0	HPRC_PLUS	male	3140		EUR	PGP - Ashkenazim Jewish	HG002	HG002 1 JAHKSE010000037.1	693	0.619	0.603	0.61	0.648	FALSE	75	SD	SD and High GA/TC (80%)
chr5	182032932	182032933	182045439	-	1	JAHKSE010000002.1	7534	7535	45166713	0	0	0	0	1	0	0	0	0	HPRC_PLUS	male	3140		EUR	PGP - Ashkenazim Jewish	HG002	HG002 1 JAHKSE010000002.1	694	0.571	0.627	0.794	0.688	FALSE	159	Chromosome end	Chromosome end or Poisson
chr5	182045434	182045435	182045439	-	1	JAHKSE010000037.1	3504	3505	110363107	0	0	0	0	1	0	0	0	0	HPRC_PLUS	male	3140		EUR	PGP - Ashkenazim Jewish	HG002	HG002 1 JAHKSE010000037.1	695	0.671	0.627	0.794	0.687	FALSE	159	Chromosome end	Chromosome end or Poisson
chr6	18199346	18199347	172126628	-	1	JAHKSE010000004.1	0	1	18309561	0	0	0	0	1	0	0	0	0	HPRC_PLUS	male	3140		EUR	PGP - Ashkenazim Jewish	HG002	HG002 1 JAHKSE010000004.1	696	0.565	0.578	0.537	0.691	FALSE	4	other	other
chr6	18200664	18200665	172126628	-	1	JAHKSE010000117.1	8321607	8321608	8321744	0	0	0	0	1	0	0	0	0	HPRC_PLUS	male	3140		EUR	PGP - Ashkenazim Jewish	HG002	HG002 1 JAHKSE010000117.1	697	0.559	0.578	0.537	0.691	FALSE	4	other	other
chr6	26521257	26521258	172126628	-	1	JAHKSE010000117.1	0	1	8321744	0	0	0	0	1	0	0	0	0	HPRC_PLUS	male	3140		EUR	PGP - Ashkenazim Jewish	HG002	HG002 1 JAHKSE010000117.1	698	0.611	0.626	0.604	0.717	FALSE	68	other	other
chr6	26557275	26557276	172126628	+	1	JAHKSE010000066.1	0	1	32583635	0	0	0	0	1	0	0	0	0	HPRC_PLUS	male	3140		EUR	PGP - Ashkenazim Jewish	HG002	HG002 1 JAHKSE010000066.1	699	0.619	0.604	0.509	0.703	FALSE	76	SD	SD and High GA/TC (80%)
chr6	58286685	58286686	172126628	-	1	JAHKSE010000055.1	1421000	1421001	1424513	0	0	0	0	1	0	0	0	0	HPRC_PLUS	male	3140		EUR	PGP - Ashkenazim Jewish	HG002	HG002 1 JAHKSE010000055.1	700	0.563	0.566	0.428	0.663	FALSE	530	other	other
chr6	58286685	58286686	172126628	+	1	JAHKSE010000215.1	2826	2827	595136	0	0	0	0	1	0	0	0	0	HPRC_PLUS	male	3140		EUR	PGP - Ashkenazim Jewish	HG002	HG002 1 JAHKSE010000215.1	701	0.563	0.566	0.428	0.663	FALSE	530	other	other
chr6	58289718	58289719	172126628	-	1	JAHKSE010000046.1	111958541	111958542	111958542	0	0	0	0	1	0	0	0	0	HPRC_PLUS	male	3140		EUR	PGP - Ashkenazim Jewish	HG002	HG002 1 JAHKSE010000046.1	702	0.563	0.566	0.428	0.663	FALSE	531	Alpha	Satellite
chr6	58291323	58291324	172126628	-	1	JAHKSE010000241.1	336479	336480	354474	0	0	0	0	1	0	0	0	0	HPRC_PLUS	male	3140		EUR	PGP - Ashkenazim Jewish	HG002	HG002 1 JAHKSE010000241.1	703	0.563	0.566	0.428	0.663	FALSE	533	Alpha	Satellite
chr6	58302155	58302156	172126628	+	1	JAHKSE010000257.1	0	1	176987	0	0	0	0	1	0	0	0	0	HPRC_PLUS	male	3140		EUR	PGP - Ashkenazim Jewish	HG002	HG002 1 JAHKSE010000257.1	704	0.51	0.509	0.428	0.617	FALSE	593	Alpha	Satellite
chr6	58307966	58307967	172126628	-	1	JAHKSE010000243.1	313582	313583	313587	0	0	0	0	1	0	0	0	0	HPRC_PLUS	male	3140		EUR	PGP - Ashkenazim Jewish	HG002	HG002 1 JAHKSE010000243.1	705	0.513	0.509	0.428	0.618	FALSE	663	Alpha	Satellite
chr6	58320963	58320964	172126628	+	1	JAHKSE010000234.1	0	1	216874	0	0	0	0	1	0	0	0	0	HPRC_PLUS	male	3140		EUR	PGP - Ashkenazim Jewish	HG002	HG002 1 JAHKSE010000234.1	706	0.513	0.506	0.425	0.618	FALSE	733	Alpha	Satellite
chr6	58322104	58322105	172126628	+	1	JAHKSE010000476.1	0	1	103674	0	0	0	0	1	0	0	0	0	HPRC_PLUS	male	3140		EUR	PGP - Ashkenazim Jewish	HG002	HG002 1 JAHKSE010000476.1	707	0.513	0.506	0.425	0.618	FALSE	737	Alpha	Satellite
chr6	58323426	58323427	172126628	-	1	JAHKSE010000370.1	292386	292387	292394	0	0	0	0	1	0	0	0	0	HPRC_PLUS	male	3140		EUR	PGP - Ashkenazim Jewish	HG002	HG002 1 JAHKSE010000370.1	708	0.513	0.506	0.425	0.618	FALSE	741	Alpha	Satellite
chr6	58323940	58323941	172126628	+	1	JAHKSE010000467.1	1	2	144406	0	0	0	0	1	0	0	0	0	HPRC_PLUS	male	3140		EUR	PGP - Ashkenazim Jewish	HG002	HG002 1 JAHKSE010000467.1	709	0.513	0.506	0.425	0.618	FALSE	742	Alpha	Satellite
chr6	58323940	58323941	172126628	+	1	JAHKSE010000431.1	8	9	77282	0	0	0	0	1	0	0	0	0	HPRC_PLUS	male	3140		EUR	PGP - Ashkenazim Jewish	HG002	HG002 1 JAHKSE010000431.1	710	0.513	0.506	0.425	0.618	FALSE	742	Alpha	Satellite
chr6	58324498	58324499	172126628	-	1	JAHKSE010000458.1	146654	146655	146655	0	0	0	0	1	0	0	0	0	HPRC_PLUS	male	3140		EUR	PGP - Ashkenazim Jewish	HG002	HG002 1 JAHKSE010000458.1	711	0.513	0.506	0.425	0.618	FALSE	743	Alpha	Satellite
chr6	58324835	58324836	172126628	-	1	JAHKSE010000417.1	201353	201354	202140	0	0	0	0	1	0	0	0	0	HPRC_PLUS	male	3140		EUR	PGP - Ashkenazim Jewish	HG002	HG002 1 JAHKSE010000417.1	712	0.513	0.506	0.425	0.618	FALSE	749	Alpha	Satellite
chr6	58326238	58326239	172126628	-	1	JAHKSE010000435.1	153135	153136	153136	0	0	0	0	1	0	0	0	0	HPRC_PLUS	male	3140		EUR	PGP - Ashkenazim Jewish	HG002	HG002 1 JAHKSE010000435.1	713	0.514	0.507	0.425	0.618	FALSE	754	Alpha	Satellite
chr6	58326744	58326745	172126628	+	1	JAHKSE010000396.1	0	1	89689	0	0	0	0	1	0	0	0	0	HPRC_PLUS	male	3140		EUR	PGP - Ashkenazim Jewish	HG002	HG002 1 JAHKSE010000396.1	714	0.514	0.507	0.425	0.618	FALSE	755	Alpha	Satellite
chr6	58330690	58330691	172126628	-	1	JAHKSE010000449.1	109733	109734	109734	0	0	0	0	1	0	0	0	0	HPRC_PLUS	male	3140		EUR	PGP - Ashkenazim Jewish	HG002	HG002 1 JAHKSE010000449.1	715	0.514	0.507	0.426	0.618	FALSE	757	Alpha	Satellite
chr6	58336186	58336187	172126628	+	1	JAHKSE010000465.1	0	1	215972	0	0	0	0	1	0	0	0	0	HPRC_PLUS	male	3140		EUR	PGP - Ashkenazim Jewish	HG002	HG002 1 JAHKSE010000465.1	716	0.515	0.511	0.426	0.618	FALSE	764	Alpha	Satellite
chr6	58338101	58338102	172126628	-	1	JAHKSE010000429.1	211307	211308	211308	0	0	0	0	1	0	0	0	0	HPRC_PLUS	male	3140		EUR	PGP - Ashkenazim Jewish	HG002	HG002 1 JAHKSE010000429.1	717	0.515	0.511	0.427	0.618	FALSE	769	Alpha	Satellite
chr6	58339667	58339668	172126628	-	1	JAHKSE010000407.1	143388	143389	143389	0	0	0	0	1	0	0	0	0	HPRC_PLUS	male	3140		EUR	PGP - Ashkenazim Jewish	HG002	HG002 1 JAHKSE010000407.1	718	0.515	0.511	0.427	0.618	FALSE	771	Alpha	Satellite
chr6	58340035	58340036	172126628	+	1	JAHKSE010000247.1	0	1	544187	100	100	100	1	0	0	0	0	0	HPRC_PLUS	male	3140		EUR	PGP - Ashkenazim Jewish	HG002	HG002 1 JAHKSE010000247.1	719	0.515	0.511	0.427	0.618	FALSE	773	Alpha	Satellite
chr6	58343661	58343662	172126628	-	1	JAHKSE010000453.1	61399	61400	61400	0	0	0	0	1	0	0	0	0	HPRC_PLUS	male	3140		EUR	PGP - Ashkenazim Jewish	HG002	HG002 1 JAHKSE010000453.1	720	0.515	0.511	0.427	0.618	FALSE	778	Alpha	Satellite
chr6	58344952	58344953	172126628	-	1	JAHKSE010000241.1	2846	2847	354474	0	0	0	0	1	0	0	0	0	HPRC_PLUS	male	3140		EUR	PGP - Ashkenazim Jewish	HG002	HG002 1 JAHKSE010000241.1	721	0.515	0.511	0.427	0.618	FALSE	778	Alpha	Satellite
chr6	58345765	58345766	172126628	-	1	JAHKSE010000503.1	49827	49828	49828	0	0	0	0	1	0	0	0	0	HPRC_PLUS	male	3140		EUR	PGP - Ashkenazim Jewish	HG002	HG002 1 JAHKSE010000503.1	722	0.515	0.511	0.427	0.618	FALSE	780	Alpha	Satellite
chr6	58346912	58346913	172126628	+	1	JAHKSE010000296.1	0	1	67226	0	0	0	0	1	0	0	0	0	HPRC_PLUS	male	3140		EUR	PGP - Ashkenazim Jewish	HG002	HG002 1 JAHKSE010000296.1	723	0.515	0.511	0.427	0.618	FALSE	787	Alpha	Satellite
chr6	58347348	58347349	172126628	+	1	JAHKSE010000440.1	0	1	71947	0	0	0	0	1	0	0	0	0	HPRC_PLUS	male	3140		EUR	PGP - Ashkenazim Jewish	HG002	HG002 1 JAHKSE010000440.1	724	0.515	0.511	0.427	0.616	FALSE	788	Alpha	Satellite
chr6	58347670	58347671	172126628	+	1	JAHKSE010000357.1	7	8	66066	0	0	0	0	1	0	0	0	0	HPRC_PLUS	male	3140		EUR	PGP - Ashkenazim Jewish	HG002	HG002 1 JAHKSE010000357.1	725	0.515	0.511	0.427	0.616	FALSE	789	Alpha	Satellite
chr6	58349068	58349069	172126628	-	1	JAHKSE010000270.1	227689	227690	227690	0	0	0	0	1	0	0	0	0	HPRC_PLUS	male	3140		EUR	PGP - Ashkenazim Jewish	HG002	HG002 1 JAHKSE010000270.1	726	0.515	0.511	0.427	0.616	FALSE	794	Alpha	Satellite
chr6	58351109	58351110	172126628	+	1	JAHKSE010000481.1	0	1	61379	0	0	0	0	1	0	0	0	0	HPRC_PLUS	male	3140		EUR	PGP - Ashkenazim Jewish	HG002	HG002 1 JAHKSE010000481.1	727	0.515	0.511	0.427	0.617	FALSE	798	Alpha	Satellite
chr6	58351393	58351394	172126628	-	1	JAHKSE010000096.1	62811	62812	62812	0	0	0	0	1	0	0	0	0	HPRC_PLUS	male	3140		EUR	PGP - Ashkenazim Jewish	HG002	HG002 1 JAHKSE010000096.1	728	0.515	0.511	0.427	0.617	FALSE	798	Alpha	Satellite
chr6	58352900	58352901	172126628	-	1	JAHKSE010000585.1	47551	47552	47552	0	0	0	0	1	0	0	0	0	HPRC_PLUS	male	3140		EUR	PGP - Ashkenazim Jewish	HG002	HG002 1 JAHKSE010000585.1	729	0.515	0.511	0.427	0.617	FALSE	801	Alpha	Satellite
chr6	58355280	58355281	172126628	+	1	JAHKSE010000436.1	0	1	57614	0	0	0	0	1	0	0	0	0	HPRC_PLUS	male	3140		EUR	PGP - Ashkenazim Jewish	HG002	HG002 1 JAHKSE010000436.1	730	0.515	0.511	0.427	0.617	FALSE	803	Alpha	Satellite
chr6	58357383	58357384	172126628	+	1	JAHKSE010000463.1	0	1	46568	0	0	0	0	1	0	0	0	0	HPRC_PLUS	male	3140		EUR	PGP - Ashkenazim Jewish	HG002	HG002 1 JAHKSE010000463.1	731	0.513	0.508	0.427	0.617	FALSE	809	Alpha	Satellite
chr6	58358232	58358233	172126628	-	1	JAHKSE010000272.1	48961	48962	48962	0	0	0	0	1	0	0	0	0	HPRC_PLUS	male	3140		EUR	PGP - Ashkenazim Jewish	HG002	HG002 1 JAHKSE010000272.1	732	0.513	0.508	0.427	0.617	FALSE	809	Alpha	Satellite
chr6	58397978	58397979	172126628	-	1	JAHKSE010000503.1	0	1	49828	0	0	0	0	1	0	0	0	0	HPRC_PLUS	male	3140		EUR	PGP - Ashkenazim Jewish	HG002	HG002 1 JAHKSE010000503.1	733	0.508	0.508	0.423	0.62	FALSE	767	Alpha	Satellite
chr6	58398080	58398081	172126628	-	1	JAHKSE010000585.1	0	1	47552	0	0	0	0	1	0	0	0	0	HPRC_PLUS	male	3140		EUR	PGP - Ashkenazim Jewish	HG002	HG002 1 JAHKSE010000585.1	734	0.508	0.508	0.423	0.62	FALSE	767	Alpha	Satellite
chr6	58401225	58401226	172126628	+	1	JAHKSE010000431.1	77281	77282	77282	0	0	0	0	1	0	0	0	0	HPRC_PLUS	male	3140		EUR	PGP - Ashkenazim Jewish	HG002	HG002 1 JAHKSE010000431.1	735	0.508	0.508	0.423	0.62	FALSE	767	Alpha	Satellite
chr6	58403963	58403964	172126628	+	1	JAHKSE010000463.1	46567	46568	46568	0	0	0	0	1	0	0	0	0	HPRC_PLUS	male	3140		EUR	PGP - Ashkenazim Jewish	HG002	HG002 1 JAHKSE010000463.1	736	0.509	0.508	0.423	0.62	FALSE	756	Alpha	Satellite
chr6	58405740	58405741	172126628	-	1	JAHKSE010000453.1	0	1	61400	0	0	0	0	1	0	0	0	0	HPRC_PLUS	male	3140		EUR	PGP - Ashkenazim Jewish	HG002	HG002 1 JAHKSE010000453.1	737	0.509	0.508	0.423	0.62	FALSE	751	Alpha	Satellite
chr6	58407191	58407192	172126628	-	1	JAHKSE010000272.1	0	1	48962	0	0	0	0	1	0	0	0	0	HPRC_PLUS	male	3140		EUR	PGP - Ashkenazim Jewish	HG002	HG002 1 JAHKSE010000272.1	738	0.51	0.508	0.423	0.62	FALSE	748	Alpha	Satellite
chr6	58411864	58411865	172126628	+	1	JAHKSE010000357.1	66065	66066	66066	0	0	0	0	1	0	0	0	0	HPRC_PLUS	male	3140		EUR	PGP - Ashkenazim Jewish	HG002	HG002 1 JAHKSE010000357.1	739	0.51	0.508	0.424	0.62	FALSE	729	Alpha	Satellite
chr6	58412484	58412485	172126628	+	1	JAHKSE010000481.1	61378	61379	61379	0	0	0	0	1	0	0	0	0	HPRC_PLUS	male	3140		EUR	PGP - Ashkenazim Jewish	HG002	HG002 1 JAHKSE010000481.1	740	0.51	0.508	0.424	0.62	FALSE	725	Alpha	Satellite
chr6	58412904	58412905	172126628	+	1	JAHKSE010000436.1	57613	57614	57614	0	0	0	0	1	0	0	0	0	HPRC_PLUS	male	3140		EUR	PGP - Ashkenazim Jewish	HG002	HG002 1 JAHKSE010000436.1	741	0.51	0.508	0.424	0.62	FALSE	722	Alpha	Satellite
chr6	58413562	58413563	172126628	+	1	JAHKSE010000396.1	89688	89689	89689	0	0	0	0	1	0	0	0	0	HPRC_PLUS	male	3140		EUR	PGP - Ashkenazim Jewish	HG002	HG002 1 JAHKSE010000396.1	742	0.51	0.509	0.424	0.62	FALSE	719	Alpha	Satellite
chr6	58414136	58414137	172126628	+	1	JAHKSE010000296.1	67225	67226	67226	0	0	0	0	1	0	0	0	0	HPRC_PLUS	male	3140		EUR	PGP - Ashkenazim Jewish	HG002	HG002 1 JAHKSE010000296.1	743	0.51	0.509	0.424	0.62	FALSE	718	Alpha	Satellite
chr6	58414204	58414205	172126628	-	1	JAHKSE010000096.1	0	1	62812	0	0	0	0	1	0	0	0	0	HPRC_PLUS	male	3140		EUR	PGP - Ashkenazim Jewish	HG002	HG002 1 JAHKSE010000096.1	744	0.51	0.509	0.424	0.62	FALSE	718	Alpha	Satellite
chr6	58419285	58419286	172126628	+	1	JAHKSE010000440.1	71946	71947	71947	0	0	0	0	1	0	0	0	0	HPRC_PLUS	male	3140		EUR	PGP - Ashkenazim Jewish	HG002	HG002 1 JAHKSE010000440.1	745	0.511	0.512	0.424	0.62	FALSE	692	Alpha	Satellite
chr6	58425802	58425803	172126628	+	1	JAHKSE010000476.1	103673	103674	103674	0	0	0	0	1	0	0	0	0	HPRC_PLUS	male	3140		EUR	PGP - Ashkenazim Jewish	HG002	HG002 1 JAHKSE010000476.1	746	0.511	0.512	0.424	0.62	FALSE	632	Alpha	Satellite
chr6	58439936	58439937	172126628	-	1	JAHKSE010000449.1	0	1	109734	0	0	0	0	1	0	0	0	0	HPRC_PLUS	male	3140		EUR	PGP - Ashkenazim Jewish	HG002	HG002 1 JAHKSE010000449.1	747	0.511	0.509	0.421	0.622	FALSE	524	Alpha	Satellite
chr6	58467333	58467334	172126628	+	1	JAHKSE010000467.1	144405	144406	144406	0	0	0	0	1	0	0	0	0	HPRC_PLUS	male	3140		EUR	PGP - Ashkenazim Jewish	HG002	HG002 1 JAHKSE010000467.1	748	0.51	0.508	0.421	0.624	FALSE	371	Alpha	Satellite
chr6	58470185	58470186	172126628	-	1	JAHKSE010000458.1	0	1	146655	0	0	0	0	1	0	0	0	0	HPRC_PLUS	male	3140		EUR	PGP - Ashkenazim Jewish	HG002	HG002 1 JAHKSE010000458.1	749	0.51	0.508	0.421	0.624	FALSE	369	Alpha	Satellite
chr6	58478036	58478037	172126628	+	1	JAHKSE010000257.1	176895	176896	176987	0	0	0	0	1	0	0	0	0	HPRC_PLUS	male	3140		EUR	PGP - Ashkenazim Jewish	HG002	HG002 1 JAHKSE010000257.1	750	0.511	0.511	0.421	0.624	FALSE	372	Alpha	Satellite
chr6	58478908	58478909	172126628	-	1	JAHKSE010000435.1	5	6	153136	0	0	0	0	1	0	0	0	0	HPRC_PLUS	male	3140		EUR	PGP - Ashkenazim Jewish	HG002	HG002 1 JAHKSE010000435.1	751	0.511	0.511	0.421	0.624	FALSE	370	Alpha	Satellite
chr6	58482231	58482232	172126628	-	1	JAHKSE010000407.1	0	1	143389	0	0	0	0	1	0	0	0	0	HPRC_PLUS	male	3140		EUR	PGP - Ashkenazim Jewish	HG002	HG002 1 JAHKSE010000407.1	752	0.511	0.511	0.421	0.62	FALSE	371	Alpha	Satellite
chr6	58527232	58527233	172126628	-	1	JAHKSE010000417.1	0	1	202140	0	0	0	0	1	0	0	0	0	HPRC_PLUS	male	3140		EUR	PGP - Ashkenazim Jewish	HG002	HG002 1 JAHKSE010000417.1	753	0.51	0.511	0.421	0.621	FALSE	176	Alpha	Satellite
chr6	58528076	58528077	172126628	+	1	JAHKSE010000234.1	216873	216874	216874	0	0	0	0	1	0	0	0	0	HPRC_PLUS	male	3140		EUR	PGP - Ashkenazim Jewish	HG002	HG002 1 JAHKSE010000234.1	754	0.51	0.511	0.421	0.621	FALSE	177	Alpha	Satellite
chr6	58549835	58549836	172126628	+	1	JAHKSE010000465.1	215971	215972	215972	0	0	0	0	1	0	0	0	0	HPRC_PLUS	male	3140		EUR	PGP - Ashkenazim Jewish	HG002	HG002 1 JAHKSE010000465.1	755	0.51	0.508	0.423	0.624	FALSE	149	Alpha	Satellite
chr6	58553548	58553549	172126628	-	1	JAHKSE010000429.1	2571	2572	211308	0	0	0	0	1	0	0	0	0	HPRC_PLUS	male	3140		EUR	PGP - Ashkenazim Jewish	HG002	HG002 1 JAHKSE010000429.1	756	0.51	0.508	0.423	0.624	FALSE	144	Alpha	Satellite
chr6	58579336	58579337	172126628	-	1	JAHKSE010000270.1	0	1	227690	0	0	0	0	1	0	0	0	0	HPRC_PLUS	male	3140		EUR	PGP - Ashkenazim Jewish	HG002	HG002 1 JAHKSE010000270.1	757	0.509	0.51	0.423	0.62	FALSE	130	Alpha	Satellite
chr6	58617442	58617443	172126628	-	1	JAHKSE010000370.1	0	1	292394	0	0	0	0	1	0	0	0	0	HPRC_PLUS	male	3140		EUR	PGP - Ashkenazim Jewish	HG002	HG002 1 JAHKSE010000370.1	758	0.509	0.508	0.423	0.619	FALSE	118	Alpha	Satellite
chr6	58619218	58619219	172126628	-	1	JAHKSE010000243.1	0	1	313587	0	0	0	0	1	0	0	0	0	HPRC_PLUS	male	3140		EUR	PGP - Ashkenazim Jewish	HG002	HG002 1 JAHKSE010000243.1	759	0.509	0.509	0.423	0.619	FALSE	118	Alpha	Satellite
chr6	58742953	58742954	172126628	+	1	JAHKSE010000247.1	518632	518633	544187	0	0	0	0	1	0	0	0	0	HPRC_PLUS	male	3140		EUR	PGP - Ashkenazim Jewish	HG002	HG002 1 JAHKSE010000247.1	760	0.513	0.512	0.424	0.622	FALSE	56	Alpha	Satellite
chr6	58856482	58856483	172126628	+	1	JAHKSE010000215.1	595135	595136	595136	0	0	0	0	1	0	0	0	0	HPRC_PLUS	male	3140		EUR	PGP - Ashkenazim Jewish	HG002	HG002 1 JAHKSE010000215.1	761	0.51	0.509	0.425	0.621	FALSE	37	Alpha	Satellite
chr6	59039417	59039418	172126628	+	1	JAHKSE010000066.1	32583634	32583635	32583635	0	0	0	0	1	0	0	0	0	HPRC_PLUS	male	3140		EUR	PGP - Ashkenazim Jewish	HG002	HG002 1 JAHKSE010000066.1	762	0.51	0.509	0.424	0.618	FALSE	43	Alpha	Satellite
chr6	59093099	59093100	172126628	-	1	JAHKSE010000055.1	0	1	1424513	0	0	0	0	1	0	0	0	0	HPRC_PLUS	male	3140		EUR	PGP - Ashkenazim Jewish	HG002	HG002 1 JAHKSE010000055.1	763	0.509	0.507	0.423	0.619	FALSE	40	Alpha	Satellite
chr6	172119957	172119958	172126628	-	1	JAHKSE010000046.1	17893	17894	111958542	0	0	0	0	1	0	0	0	0	HPRC_PLUS	male	3140		EUR	PGP - Ashkenazim Jewish	HG002	HG002 1 JAHKSE010000046.1	764	0.692	0.655	0.861	0.694	FALSE	140	Chromosome end	Chromosome end or Poisson
chr7	0	1	160567428	+	1	JAHKSE010000047.1	3019	3020	58953395	0	0	0	0	1	0	0	0	0	HPRC_PLUS	male	3140		EUR	PGP - Ashkenazim Jewish	HG002	HG002 1 JAHKSE010000047.1	765	0.628	0.686	0.794	0.672	FALSE	83	Chromosome end	Chromosome end or Poisson
chr7	58472397	58472398	160567428	-	1	JAHKSE010000517.1	37223	37224	37224	0	0	0	0	1	0	0	0	0	HPRC_PLUS	male	3140		EUR	PGP - Ashkenazim Jewish	HG002	HG002 1 JAHKSE010000517.1	766	0.287	0.757	0.424	0.618	FALSE	2	Poisson breaks	Chromosome end or Poisson
chr7	58507478	58507479	160567428	-	1	JAHKSE010000517.1	0	1	37224	0	0	0	0	1	0	0	0	0	HPRC_PLUS	male	3140		EUR	PGP - Ashkenazim Jewish	HG002	HG002 1 JAHKSE010000517.1	767	0.28	0.762	0.423	0.624	FALSE	5	10% Low Complexity	Satellite
chr7	58775560	58775561	160567428	-	1	JAHKSE010000129.1	25962	25963	27306	0	0	0	0	1	0	0	0	0	HPRC_PLUS	male	3140		EUR	PGP - Ashkenazim Jewish	HG002	HG002 1 JAHKSE010000129.1	768	0.28	0.758	0.426	0.614	FALSE	31	SD	SD and High GA/TC (80%)
chr7	58801609	58801610	160567428	-	1	JAHKSE010000129.1	0	1	27306	0	0	0	0	1	0	0	0	0	HPRC_PLUS	male	3140		EUR	PGP - Ashkenazim Jewish	HG002	HG002 1 JAHKSE010000129.1	769	0.313	0.75	0.421	0.641	FALSE	50	SD	SD and High GA/TC (80%)
chr7	58855104	58855105	160567428	+	1	JAHKSE010000556.1	0	1	43014	0	0	0	0	1	0	0	0	0	HPRC_PLUS	male	3140		EUR	PGP - Ashkenazim Jewish	HG002	HG002 1 JAHKSE010000556.1	770	0.639	0.706	0.635	0.741	FALSE	63	SD	SD and High GA/TC (80%)
chr7	58855444	58855445	160567428	+	1	JAHKSE010000528.1	0	1	25500	0	0	0	0	1	0	0	0	0	HPRC_PLUS	male	3140		EUR	PGP - Ashkenazim Jewish	HG002	HG002 1 JAHKSE010000528.1	771	0.639	0.706	0.635	0.741	FALSE	63	SD	SD and High GA/TC (80%)
chr7	58855462	58855463	160567428	+	1	JAHKSE010000552.1	0	1	48170	0	0	0	0	1	0	0	0	0	HPRC_PLUS	male	3140		EUR	PGP - Ashkenazim Jewish	HG002	HG002 1 JAHKSE010000552.1	772	0.639	0.706	0.635	0.741	FALSE	63	SD	SD and High GA/TC (80%)
chr7	58868741	58868742	160567428	+	1	JAHKSE010000047.1	58953394	58953395	58953395	0	0	0	0	1	0	0	0	0	HPRC_PLUS	male	3140		EUR	PGP - Ashkenazim Jewish	HG002	HG002 1 JAHKSE010000047.1	773	0.742	0.606	0.507	0.764	FALSE	63	SD	SD and High GA/TC (80%)
chr7	58880944	58880945	160567428	+	1	JAHKSE010000528.1	25499	25500	25500	0	0	0	0	1	0	0	0	0	HPRC_PLUS	male	3140		EUR	PGP - Ashkenazim Jewish	HG002	HG002 1 JAHKSE010000528.1	774	0.742	0.606	0.508	0.757	FALSE	62	SD	SD and High GA/TC (80%)
chr7	58886339	58886340	160567428	+	1	JAHKSE010000256.1	0	1	642288	0	0	0	0	1	0	0	0	0	HPRC_PLUS	male	3140		EUR	PGP - Ashkenazim Jewish	HG002	HG002 1 JAHKSE010000256.1	775	0.591	0.619	0.508	0.757	FALSE	62	SD	SD and High GA/TC (80%)
chr7	58898118	58898119	160567428	+	1	JAHKSE010000556.1	43013	43014	43014	0	0	0	0	1	0	0	0	0	HPRC_PLUS	male	3140		EUR	PGP - Ashkenazim Jewish	HG002	HG002 1 JAHKSE010000556.1	776	0.707	0.644	0.635	0.733	FALSE	62	SD	SD and High GA/TC (80%)
chr7	58903633	58903634	160567428	+	1	JAHKSE010000552.1	48169	48170	48170	0	0	0	0	1	0	0	0	0	HPRC_PLUS	male	3140		EUR	PGP - Ashkenazim Jewish	HG002	HG002 1 JAHKSE010000552.1	777	0.707	0.644	0.635	0.732	FALSE	61	SD	SD and High GA/TC (80%)
chr7	59508168	59508169	160567428	-	1	JAHKSE010000269.1	631844	631845	631845	0	0	0	0	1	0	0	0	0	HPRC_PLUS	male	3140		EUR	PGP - Ashkenazim Jewish	HG002	HG002 1 JAHKSE010000269.1	778	0.531	0.614	0.386	0.662	FALSE	20	Alpha	Satellite
chr7	59528623	59528624	160567428	+	1	JAHKSE010000256.1	642287	642288	642288	0	0	0	0	1	0	0	0	0	HPRC_PLUS	male	3140		EUR	PGP - Ashkenazim Jewish	HG002	HG002 1 JAHKSE010000256.1	779	0.565	0.535	0.417	0.661	FALSE	24	Alpha	Satellite
chr7	60129185	60129186	160567428	+	1	JAHKSE010000250.1	0	1	56949	0	0	0	0	1	0	0	0	0	HPRC_PLUS	male	3140		EUR	PGP - Ashkenazim Jewish	HG002	HG002 1 JAHKSE010000250.1	780	0.534	0.565	0.417	0.668	FALSE	19	Alpha	Satellite
chr7	60131320	60131321	160567428	-	1	JAHKSE010000077.1	14767333	14767334	14767334	0	0	0	0	1	0	0	0	0	HPRC_PLUS	male	3140		EUR	PGP - Ashkenazim Jewish	HG002	HG002 1 JAHKSE010000077.1	781	0.534	0.565	0.417	0.661	FALSE	19	Alpha	Satellite
chr7	60158478	60158479	160567428	-	1	JAHKSE010000269.1	0	1	631845	0	0	0	0	1	0	0	0	0	HPRC_PLUS	male	3140		EUR	PGP - Ashkenazim Jewish	HG002	HG002 1 JAHKSE010000269.1	782	0.616	0.531	0.436	0.662	FALSE	21	Alpha	Satellite
chr7	60186132	60186133	160567428	+	1	JAHKSE010000250.1	56948	56949	56949	0	0	0	0	1	0	0	0	0	HPRC_PLUS	male	3140		EUR	PGP - Ashkenazim Jewish	HG002	HG002 1 JAHKSE010000250.1	783	0.556	0.557	0.414	0.669	FALSE	19	Alpha	Satellite
chr7	61681036	61681037	160567428	-	1	JAHKSE010000123.1	25956	25957	25957	0	0	0	0	1	0	0	0	0	HPRC_PLUS	male	3140		EUR	PGP - Ashkenazim Jewish	HG002	HG002 1 JAHKSE010000123.1	784	0.505	0.508	0.397	0.615	FALSE	67	Alpha	Satellite
chr7	61706999	61707000	160567428	-	1	JAHKSE010000123.1	0	1	25957	0	0	0	0	1	0	0	0	0	HPRC_PLUS	male	3140		EUR	PGP - Ashkenazim Jewish	HG002	HG002 1 JAHKSE010000123.1	785	0.506	0.509	0.397	0.614	FALSE	63	Alpha	Satellite
chr7	76011394	76011395	160567428	-	1	JAHKSE010000077.1	0	1	14767334	0	0	0	0	1	0	0	0	0	HPRC_PLUS	male	3140		EUR	PGP - Ashkenazim Jewish	HG002	HG002 1 JAHKSE010000077.1	786	0.627	0.588	0.545	0.624	FALSE	11	SD	SD and High GA/TC (80%)
chr7	76017253	76017254	160567428	-	1	JAHKSE010000052.1	50308758	50308759	50308759	0	0	0	0	1	0	0	0	0	HPRC_PLUS	male	3140		EUR	PGP - Ashkenazim Jewish	HG002	HG002 1 JAHKSE010000052.1	787	0.627	0.588	0.53	0.624	FALSE	11	SD	SD and High GA/TC (80%)
chr7	126316260	126316261	160567428	+	1	JAHKSE010000064.1	0	1	34584014	0	0	0	0	1	0	0	0	0	HPRC_PLUS	male	3140		EUR	PGP - Ashkenazim Jewish	HG002	HG002 1 JAHKSE010000064.1	788	0.593	0.571	0.469	0.722	FALSE	2	Poisson breaks	Chromosome end or Poisson
chr7	126349299	126349300	160567428	-	1	JAHKSE010000052.1	0	1	50308759	0	0	0	0	1	0	0	0	0	HPRC_PLUS	male	3140		EUR	PGP - Ashkenazim Jewish	HG002	HG002 1 JAHKSE010000052.1	789	0.597	0.59	0.524	0.731	FALSE	2	Poisson breaks	Chromosome end or Poisson
chr7	160567427	160567428	160567428	+	1	JAHKSE010000064.1	34576916	34576917	34584014	0	0	0	0	1	0	0	0	0	HPRC_PLUS	male	3140		EUR	PGP - Ashkenazim Jewish	HG002	HG002 1 JAHKSE010000064.1	790	0.679688	0.59	0.825	0.659	FALSE	95	Chromosome end	Chromosome end or Poisson
chr8	43640106	43640107	146259331	+	1	JAHKSE010000230.1	0	1	27828	0	0	0	0	1	0	0	0	0	HPRC_PLUS	male	3140		EUR	PGP - Ashkenazim Jewish	HG002	HG002 1 JAHKSE010000230.1	791	0.619	0.631	0.545	0.752	FALSE	7	other	other
chr8	43667940	43667941	146259331	+	1	JAHKSE010000230.1	27827	27828	27828	0	0	0	0	1	0	0	0	0	HPRC_PLUS	male	3140		EUR	PGP - Ashkenazim Jewish	HG002	HG002 1 JAHKSE010000230.1	792	0.534	0.636	0.534	0.715	FALSE	7	other	other
chr8	44643412	44643413	146259331	+	1	JAHKSE010000002.1	45166712	45166713	45166713	0	0	0	0	1	0	0	0	0	HPRC_PLUS	male	3140		EUR	PGP - Ashkenazim Jewish	HG002	HG002 1 JAHKSE010000002.1	793	0.525	0.499	0.398	0.617	FALSE	51	Alpha	Satellite
chr8	44646473	44646474	146259331	+	1	JAHKSE010000405.1	187021	187022	193009	0	0	0	0	1	0	0	0	0	HPRC_PLUS	male	3140		EUR	PGP - Ashkenazim Jewish	HG002	HG002 1 JAHKSE010000405.1	794	0.525	0.499	0.398	0.617	FALSE	52	Alpha	Satellite
chr8	44809314	44809315	146259331	-	1	JAHKSE010000497.1	44781	44782	44918	0	0	0	0	1	0	0	0	0	HPRC_PLUS	male	3140		EUR	PGP - Ashkenazim Jewish	HG002	HG002 1 JAHKSE010000497.1	795	0.525	0.495	0.399	0.616	FALSE	77	Alpha	Satellite
chr8	44815220	44815221	146259331	-	1	JAHKSE010000454.1	38996	38997	38997	0	0	0	0	1	0	0	0	0	HPRC_PLUS	male	3140		EUR	PGP - Ashkenazim Jewish	HG002	HG002 1 JAHKSE010000454.1	796	0.525	0.495	0.399	0.616	FALSE	97	Alpha	Satellite
chr8	44818491	44818492	146259331	+	1	JAHKSE010000555.1	0	1	40714	0	0	0	0	1	0	0	0	0	HPRC_PLUS	male	3140		EUR	PGP - Ashkenazim Jewish	HG002	HG002 1 JAHKSE010000555.1	797	0.525	0.495	0.399	0.616	FALSE	109	Alpha	Satellite
chr8	44822485	44822486	146259331	+	1	JAHKSE010000483.1	0	1	75220	0	0	0	0	1	0	0	0	0	HPRC_PLUS	male	3140		EUR	PGP - Ashkenazim Jewish	HG002	HG002 1 JAHKSE010000483.1	798	0.525	0.495	0.399	0.616	FALSE	115	Alpha	Satellite
chr8	44822499	44822500	146259331	+	1	JAHKSE010000425.1	0	1	148781	0	0	0	0	1	0	0	0	0	HPRC_PLUS	male	3140		EUR	PGP - Ashkenazim Jewish	HG002	HG002 1 JAHKSE010000425.1	799	0.525	0.495	0.399	0.616	FALSE	115	Alpha	Satellite
chr8	44822943	44822944	146259331	-	1	JAHKSE010000462.1	99694	99695	99695	0	0	0	0	1	0	0	0	0	HPRC_PLUS	male	3140		EUR	PGP - Ashkenazim Jewish	HG002	HG002 1 JAHKSE010000462.1	800	0.525	0.495	0.399	0.616	FALSE	115	Alpha	Satellite
chr8	44834150	44834151	146259331	-	1	JAHKSE010000125.1	0	1	98260	0	0	0	0	1	0	0	0	0	HPRC_PLUS	male	3140		EUR	PGP - Ashkenazim Jewish	HG002	HG002 1 JAHKSE010000125.1	801	0.526	0.495	0.399	0.616	FALSE	142	Alpha	Satellite
chr8	44841423	44841424	146259331	+	1	JAHKSE010000483.1	75185	75186	75220	0	0	0	0	1	0	0	0	0	HPRC_PLUS	male	3140		EUR	PGP - Ashkenazim Jewish	HG002	HG002 1 JAHKSE010000483.1	802	0.526	0.495	0.4	0.616	FALSE	150	Alpha	Satellite
chr8	44848986	44848987	146259331	+	1	JAHKSE010000555.1	40707	40708	40714	0	0	0	0	1	0	0	0	0	HPRC_PLUS	male	3140		EUR	PGP - Ashkenazim Jewish	HG002	HG002 1 JAHKSE010000555.1	803	0.524	0.497	0.4	0.617	FALSE	154	Alpha	Satellite
chr8	44853012	44853013	146259331	-	1	JAHKSE010000454.1	1	2	38997	0	0	0	0	1	0	0	0	0	HPRC_PLUS	male	3140		EUR	PGP - Ashkenazim Jewish	HG002	HG002 1 JAHKSE010000454.1	804	0.525	0.497	0.4	0.618	FALSE	155	Alpha	Satellite
chr8	44855441	44855442	146259331	-	1	JAHKSE010000497.1	0	1	44918	0	0	0	0	1	0	0	0	0	HPRC_PLUS	male	3140		EUR	PGP - Ashkenazim Jewish	HG002	HG002 1 JAHKSE010000497.1	805	0.525	0.497	0.4	0.618	FALSE	156	Alpha	Satellite
chr8	44855971	44855972	146259331	-	1	JAHKSE010000462.1	2908	2909	99695	0	0	0	0	1	0	0	0	0	HPRC_PLUS	male	3140		EUR	PGP - Ashkenazim Jewish	HG002	HG002 1 JAHKSE010000462.1	806	0.525	0.497	0.4	0.618	FALSE	156	Alpha	Satellite
chr8	44909929	44909930	146259331	+	1	JAHKSE010000405.1	0	1	193009	0	0	0	0	1	0	0	0	0	HPRC_PLUS	male	3140		EUR	PGP - Ashkenazim Jewish	HG002	HG002 1 JAHKSE010000405.1	807	0.524	0.495	0.398	0.616	FALSE	222	Alpha	Satellite
chr8	44912979	44912980	146259331	+	1	JAHKSE010000083.1	0	1	1355037	0	0	0	0	1	0	0	0	0	HPRC_PLUS	male	3140		EUR	PGP - Ashkenazim Jewish	HG002	HG002 1 JAHKSE010000083.1	808	0.524	0.495	0.398	0.616	FALSE	223	Alpha	Satellite
chr8	44917270	44917271	146259331	-	1	JAHKSE010000217.1	136981	136982	136982	0	0	0	0	1	0	0	0	0	HPRC_PLUS	male	3140		EUR	PGP - Ashkenazim Jewish	HG002	HG002 1 JAHKSE010000217.1	809	0.525	0.495	0.398	0.616	FALSE	216	Alpha	Satellite
chr8	44920726	44920727	146259331	-	1	JAHKSE010000125.1	98259	98260	98260	0	0	0	0	1	0	0	0	0	HPRC_PLUS	male	3140		EUR	PGP - Ashkenazim Jewish	HG002	HG002 1 JAHKSE010000125.1	810	0.525	0.495	0.398	0.616	FALSE	213	Alpha	Satellite
chr8	44961989	44961990	146259331	+	1	JAHKSE010000425.1	148775	148776	148781	0	0	0	0	1	0	0	0	0	HPRC_PLUS	male	3140		EUR	PGP - Ashkenazim Jewish	HG002	HG002 1 JAHKSE010000425.1	811	0.526	0.494	0.399	0.617	FALSE	180	Alpha	Satellite
chr8	44975376	44975377	146259331	-	1	JAHKSE010000217.1	1512	1513	136982	0	0	0	0	1	0	0	0	0	HPRC_PLUS	male	3140		EUR	PGP - Ashkenazim Jewish	HG002	HG002 1 JAHKSE010000217.1	812	0.526	0.496	0.399	0.616	FALSE	180	Alpha	Satellite
chr8	46164938	46164939	146259331	+	1	JAHKSE010000019.1	1638	1639	40382433	0	0	0	0	1	0	0	0	0	HPRC_PLUS	male	3140		EUR	PGP - Ashkenazim Jewish	HG002	HG002 1 JAHKSE010000019.1	813	0.527	0.5	0.401	0.619	FALSE	11	Alpha	Satellite
chr8	46362125	46362126	146259331	+	1	JAHKSE010000083.1	1355036	1355037	1355037	0	0	0	0	1	0	0	0	0	HPRC_PLUS	male	3140		EUR	PGP - Ashkenazim Jewish	HG002	HG002 1 JAHKSE010000083.1	814	0.523	0.641	0.526	0.661	FALSE	8	other	other
chr8	86325486	86325487	146259331	+	1	JAHKSE010000019.1	40382432	40382433	40382433	0	0	0	0	1	0	0	0	0	HPRC_PLUS	male	3140		EUR	PGP - Ashkenazim Jewish	HG002	HG002 1 JAHKSE010000019.1	815	0.588	0.604	0.642	0.641	FALSE	18	SD	SD and High GA/TC (80%)
chr8	86390246	86390247	146259331	+	1	JAHKSE010000038.1	18244	18245	59822670	0	0	0	0	1	0	0	0	0	HPRC_PLUS	male	3140		EUR	PGP - Ashkenazim Jewish	HG002	HG002 1 JAHKSE010000038.1	816	0.604	0.602	0.638	0.641	FALSE	19	SD	SD and High GA/TC (80%)
chr8	146254005	146254006	146259331	+	1	JAHKSE010000038.1	59814691	59814692	59822670	0	0	0	0	1	0	0	0	0	HPRC_PLUS	male	3140		EUR	PGP - Ashkenazim Jewish	HG002	HG002 1 JAHKSE010000038.1	817	0.693	0.609	0.628	0.642	FALSE	94	Chromosome end	Chromosome end or Poisson
chr9	0	1	150617247	+	1	JAHKSE010000087.1	2401	2402	44371338	0	0	0	0	1	0	0	0	0	HPRC_PLUS	male	3140		EUR	PGP - Ashkenazim Jewish	HG002	HG002 1 JAHKSE010000087.1	818	0.609	0.676	0.808	0.503	FALSE	93	Chromosome end	Chromosome end or Poisson
chr9	45662301	45662302	150617247	+	1	JAHKSE010000128.1	9130	9131	3449355	0	0	0	0	1	0	0	0	0	HPRC_PLUS	male	3140		EUR	PGP - Ashkenazim Jewish	HG002	HG002 1 JAHKSE010000128.1	819	0.517	0.505	0.387	0.643	FALSE	8	Alpha	Satellite
chr9	46231965	46231966	150617247	+	1	JAHKSE010000087.1	44371162	44371163	44371338	0	0	0	0	1	0	0	0	0	HPRC_PLUS	male	3140		EUR	PGP - Ashkenazim Jewish	HG002	HG002 1 JAHKSE010000087.1	820	0.512	0.505	0.386	0.636	FALSE	19	Alpha	Satellite
chr9	49033993	49033994	150617247	+	1	JAHKSE010000057.1	0	1	9766600	100	100	100	1	0	0	0	0	0	HPRC_PLUS	male	3140		EUR	PGP - Ashkenazim Jewish	HG002	HG002 1 JAHKSE010000057.1	821	0.553	0.465	0.489	0.532	FALSE	39	Satellite	Satellite
chr9	49051695	49051696	150617247	+	1	JAHKSE010000128.1	3449354	3449355	3449355	0	0	0	0	1	0	0	0	0	HPRC_PLUS	male	3140		EUR	PGP - Ashkenazim Jewish	HG002	HG002 1 JAHKSE010000128.1	822	0.555	0.752	0.487	0.608	FALSE	39	Satellite	Satellite
chr9	50413557	50413558	150617247	-	1	JAHKSE010000321.1	9215	9216	373019	0	0	0	0	1	0	0	0	0	HPRC_PLUS	male	3140		EUR	PGP - Ashkenazim Jewish	HG002	HG002 1 JAHKSE010000321.1	823	0.748	0.29	0.424	0.603	FALSE	2	Poisson breaks	Chromosome end or Poisson
chr9	50549010	50549011	150617247	-	1	JAHKSE010000321.1	335503	335504	373019	0	0	0	0	1	0	0	0	0	HPRC_PLUS	male	3140		EUR	PGP - Ashkenazim Jewish	HG002	HG002 1 JAHKSE010000321.1	824	0.747	0.287	0.43	0.599	FALSE	1	Poisson breaks	Chromosome end or Poisson
chr9	53908833	53908834	150617247	-	1	JAHKSE010000008.1	49812	49813	512544	0	0	0	0	1	0	0	0	0	HPRC_PLUS	male	3140		EUR	PGP - Ashkenazim Jewish	HG002	HG002 1 JAHKSE010000008.1	825	0.281	0.749	0.433	0.594	FALSE	2	Poisson breaks	Chromosome end or Poisson
chr9	62674596	62674597	150617247	-	1	JAHKSE010000008.1	499389	499390	512544	0	0	0	0	1	0	0	0	0	HPRC_PLUS	male	3140		EUR	PGP - Ashkenazim Jewish	HG002	HG002 1 JAHKSE010000008.1	826	0.283	0.749	0.434	0.594	FALSE	3	10% Low Complexity	Satellite
chr9	66140590	66140591	150617247	-	1	JAHKSE010000031.1	86207969	86207970	86209598	0	0	0	0	1	0	0	0	0	HPRC_PLUS	male	3140		EUR	PGP - Ashkenazim Jewish	HG002	HG002 1 JAHKSE010000031.1	827	0.752	0.282	0.437	0.6	FALSE	1	Poisson breaks	Chromosome end or Poisson
chr9	72996571	72996572	150617247	+	1	JAHKSE010000232.1	0	1	68059	0	0	0	0	1	0	0	0	0	HPRC_PLUS	male	3140		EUR	PGP - Ashkenazim Jewish	HG002	HG002 1 JAHKSE010000232.1	828	0.741	0.285	0.432	0.599	FALSE	2	Poisson breaks	Chromosome end or Poisson
chr9	73045548	73045549	150617247	+	1	JAHKSE010000232.1	47126	47127	68059	0	0	0	0	1	0	0	0	0	HPRC_PLUS	male	3140		EUR	PGP - Ashkenazim Jewish	HG002	HG002 1 JAHKSE010000232.1	829	0.745	0.286	0.432	0.594	FALSE	2	Poisson breaks	Chromosome end or Poisson
chr9	75933602	75933603	150617247	+	1	JAHKSE010000057.1	9766106	9766107	9766600	100	100	100	1	0	0	0	0	0	HPRC_PLUS	male	3140		EUR	PGP - Ashkenazim Jewish	HG002	HG002 1 JAHKSE010000057.1	830	0.746	0.282	0.427	0.596	FALSE	8	10% Low Complexity	Satellite
chr9	150617246	150617247	150617247	-	1	JAHKSE010000007.1	3219	3220	22839271	0	0	0	0	1	0	0	0	0	HPRC_PLUS	male	3140		EUR	PGP - Ashkenazim Jewish	HG002	HG002 1 JAHKSE010000007.1	831	0.691275	0.595	0.765	0.668	FALSE	81	Chromosome end	Chromosome end or Poisson
chrX	1	2	154259566	+	1	JAHKSE010000049.1	11897	11898	1021381	0	0	0	0	1	0	0	0	0	HPRC_PLUS	male	3140		EUR	PGP - Ashkenazim Jewish	HG002	HG002 1 JAHKSE010000049.1	832	0.614	0.705	0.749	0.576	FALSE	71	Chromosome end	Chromosome end or Poisson
chrY	1154489	1154490	57227415	+	1	JAHKSE010000049.1	1020222	1020223	1021381	0	0	0	0	1	0	0	0	0	HPRC_PLUS	male	3140		EUR	PGP - Ashkenazim Jewish	HG002	HG002 1 JAHKSE010000049.1	833	0.886	0.628	0.565	0.703	FALSE	148	SD and High GA/TC (80%)	SD and High GA/TC (80%)
chrY	1154848	1154849	57227415	-	1	JAHKSE010000026.1	528045	528046	528046	0	0	0	0	1	0	0	0	0	HPRC_PLUS	male	3140		EUR	PGP - Ashkenazim Jewish	HG002	HG002 1 JAHKSE010000026.1	834	0.886	0.628	0.565	0.802	FALSE	148	SD and High GA/TC (80%)	SD and High GA/TC (80%)
chrY	1681297	1681298	57227415	-	1	JAHKSE010000026.1	0	1	528046	0	0	0	0	1	0	0	0	0	HPRC_PLUS	male	3140		EUR	PGP - Ashkenazim Jewish	HG002	HG002 1 JAHKSE010000026.1	835	0.584	0.927	0.538	0.659	FALSE	107	SD and High GA/TC (80%)	SD and High GA/TC (80%)
chrY	1681956	1681957	57227415	+	1	JAHKSE010000027.1	423	424	4547640	0	0	0	0	1	0	0	0	0	HPRC_PLUS	male	3140		EUR	PGP - Ashkenazim Jewish	HG002	HG002 1 JAHKSE010000027.1	836	0.584	0.927	0.538	0.659	FALSE	107	SD and High GA/TC (80%)	SD and High GA/TC (80%)
chrY	6397971	6397972	57227415	-	1	JAHKSE010000127.1	3241960	3241961	3241961	0	0	0	0	1	0	0	0	0	HPRC_PLUS	male	3140		EUR	PGP - Ashkenazim Jewish	HG002	HG002 1 JAHKSE010000127.1	837	0.575	0.527	0.499	0.574	FALSE	9	SD	SD and High GA/TC (80%)
chrY	6422267	6422268	57227415	+	1	JAHKSE010000027.1	4547639	4547640	4547640	0	0	0	0	1	0	0	0	0	HPRC_PLUS	male	3140		EUR	PGP - Ashkenazim Jewish	HG002	HG002 1 JAHKSE010000027.1	838	0.559	0.59	0.501	0.628	FALSE	9	SD	SD and High GA/TC (80%)
chrY	9458092	9458093	57227415	-	1	JAHKSE010000282.1	58204	58205	58205	0	0	0	0	1	0	0	0	0	HPRC_PLUS	male	3140		EUR	PGP - Ashkenazim Jewish	HG002	HG002 1 JAHKSE010000282.1	839	0.574	0.583	0.678	0.728	FALSE	7	SD	SD and High GA/TC (80%)
chrY	9516395	9516396	57227415	-	1	JAHKSE010000282.1	0	1	58205	0	0	0	0	1	0	0	0	0	HPRC_PLUS	male	3140		EUR	PGP - Ashkenazim Jewish	HG002	HG002 1 JAHKSE010000282.1	840	0.579	0.632	0.68	0.729	FALSE	7	SD	SD and High GA/TC (80%)
chrY	9542217	9542218	57227415	-	1	JAHKSE010000127.1	5194	5195	3241961	0	0	0	0	1	0	0	0	0	HPRC_PLUS	male	3140		EUR	PGP - Ashkenazim Jewish	HG002	HG002 1 JAHKSE010000127.1	841	0.564	0.633	0.658	0.737	FALSE	7	SD	SD and High GA/TC (80%)
chrY	9743781	9743782	57227415	-	1	JAHKSE010000172.1	8998983	8998984	8998984	0	0	0	0	1	0	0	0	0	HPRC_PLUS	male	3140		EUR	PGP - Ashkenazim Jewish	HG002	HG002 1 JAHKSE010000172.1	842	0.589	0.56	0.5	0.616	FALSE	8	SD	SD and High GA/TC (80%)
chrY	18145028	18145029	57227415	-	1	JAHKSE010000172.1	0	1	8998984	0	0	0	0	1	0	0	0	0	HPRC_PLUS	male	3140		EUR	PGP - Ashkenazim Jewish	HG002	HG002 1 JAHKSE010000172.1	843	0.622	0.629	0.56	0.718	FALSE	3	SD	SD and High GA/TC (80%)
chrY	18401116	18401117	57227415	+	1	JAHKSE010000190.1	0	1	3649089	0	0	0	0	1	0	0	0	0	HPRC_PLUS	male	3140		EUR	PGP - Ashkenazim Jewish	HG002	HG002 1 JAHKSE010000190.1	844	0.608	0.62	0.543	0.724	FALSE	19	SD	SD and High GA/TC (80%)
chrY	22100977	22100978	57227415	-	1	JAHKSE010000268.1	329494	329495	329495	0	0	0	0	1	0	0	0	0	HPRC_PLUS	male	3140		EUR	PGP - Ashkenazim Jewish	HG002	HG002 1 JAHKSE010000268.1	845	0.602	0.587	0.513	0.671	FALSE	9	SD	SD and High GA/TC (80%)
chrY	22121213	22121214	57227415	+	1	JAHKSE010000190.1	3649088	3649089	3649089	0	0	0	0	1	0	0	0	0	HPRC_PLUS	male	3140		EUR	PGP - Ashkenazim Jewish	HG002	HG002 1 JAHKSE010000190.1	846	0.606	0.537	0.497	0.579	FALSE	9	SD	SD and High GA/TC (80%)
chrY	22430375	22430376	57227415	-	1	JAHKSE010000268.1	0	1	329495	0	0	0	0	1	0	0	0	0	HPRC_PLUS	male	3140		EUR	PGP - Ashkenazim Jewish	HG002	HG002 1 JAHKSE010000268.1	847	0.548	0.614	0.514	0.729	FALSE	11	SD	SD and High GA/TC (80%)
chrY	22466548	22466549	57227415	-	1	JAHKSE010000274.1	425308	425309	425309	0	0	0	0	1	0	0	0	0	HPRC_PLUS	male	3140		EUR	PGP - Ashkenazim Jewish	HG002	HG002 1 JAHKSE010000274.1	848	0.538	0.562	0.494	0.588	FALSE	10	SD	SD and High GA/TC (80%)
chrY	22891807	22891808	57227415	-	1	JAHKSE010000274.1	0	1	425309	0	0	0	0	1	0	0	0	0	HPRC_PLUS	male	3140		EUR	PGP - Ashkenazim Jewish	HG002	HG002 1 JAHKSE010000274.1	849	0.555	0.632	0.513	0.644	FALSE	2	Poisson breaks	Chromosome end or Poisson
chrY	24511416	24511417	57227415	-	1	JAHKSE010000191.1	113492	113493	113493	0	0	0	0	1	0	0	0	0	HPRC_PLUS	male	3140		EUR	PGP - Ashkenazim Jewish	HG002	HG002 1 JAHKSE010000191.1	850	0.624	0.557	0.471	0.712	FALSE	5	SD	SD and High GA/TC (80%)
chrY	24526788	24526789	57227415	+	1	JAHKSE010000280.1	1803728	1803729	1803729	0	0	0	0	1	0	0	0	0	HPRC_PLUS	male	3140		EUR	PGP - Ashkenazim Jewish	HG002	HG002 1 JAHKSE010000280.1	851	0.555	0.63	0.512	0.645	FALSE	6	SD	SD and High GA/TC (80%)
chrY	24624928	24624929	57227415	-	1	JAHKSE010000191.1	0	1	113493	0	0	0	0	1	0	0	0	0	HPRC_PLUS	male	3140		EUR	PGP - Ashkenazim Jewish	HG002	HG002 1 JAHKSE010000191.1	852	0.527	0.555	0.482	0.611	FALSE	8	SD	SD and High GA/TC (80%)
chrY	24710817	24710818	57227415	-	1	JAHKSE010000343.1	426793	426794	426794	0	0	0	0	1	0	0	0	0	HPRC_PLUS	male	3140		EUR	PGP - Ashkenazim Jewish	HG002	HG002 1 JAHKSE010000343.1	853	0.608	0.612	0.643	0.704	FALSE	11	SD	SD and High GA/TC (80%)
chrY	25147104	25147105	57227415	-	1	JAHKSE010000343.1	0	1	426794	0	0	0	0	1	0	0	0	0	HPRC_PLUS	male	3140		EUR	PGP - Ashkenazim Jewish	HG002	HG002 1 JAHKSE010000343.1	854	0.615	0.569	0.476	0.645	FALSE	6	SD	SD and High GA/TC (80%)
chrY	26109524	26109525	57227415	+	1	JAHKSE010000284.1	0	1	1355814	0	0	0	0	1	0	0	0	0	HPRC_PLUS	male	3140		EUR	PGP - Ashkenazim Jewish	HG002	HG002 1 JAHKSE010000284.1	855	0.572	0.586	0.554	0.707	FALSE	16	SD	SD and High GA/TC (80%)
chrY	56673214	56673215	57227415	-	1	JAHKSE010000010.1	935705	935706	950896	0	0	0	0	1	0	0	0	0	HPRC_PLUS	male	3140		EUR	PGP - Ashkenazim Jewish	HG002	HG002 1 JAHKSE010000010.1	856	0.727	0.306	0.413	0.629	FALSE	316	Satellite	Satellite
chrY	56673214	56673215	57227415	-	1	JAHKSE010000424.1	545881	545882	551629	0	0	0	0	1	0	0	0	0	HPRC_PLUS	male	3140		EUR	PGP - Ashkenazim Jewish	HG002	HG002 1 JAHKSE010000424.1	857	0.727	0.306	0.413	0.629	FALSE	316	Satellite	Satellite
chrY	56673214	56673215	57227415	+	1	JAHKSE010000141.1	9009	9010	234918	0	0	0	0	1	0	0	0	0	HPRC_PLUS	male	3140		EUR	PGP - Ashkenazim Jewish	HG002	HG002 1 JAHKSE010000141.1	858	0.727	0.306	0.413	0.629	FALSE	316	Satellite	Satellite
chrY	56673214	56673215	57227415	+	1	JAHKSE010000204.1	13617	13618	302576	0	0	0	0	1	0	0	0	0	HPRC_PLUS	male	3140		EUR	PGP - Ashkenazim Jewish	HG002	HG002 1 JAHKSE010000204.1	859	0.727	0.306	0.413	0.629	FALSE	316	Satellite	Satellite
chrY	56673214	56673215	57227415	+	1	JAHKSE010000103.1	25328	25329	5211459	0	0	0	0	1	0	0	0	0	HPRC_PLUS	male	3140		EUR	PGP - Ashkenazim Jewish	HG002	HG002 1 JAHKSE010000103.1	860	0.727	0.306	0.413	0.629	FALSE	316	Satellite	Satellite
chrY	56673214	56673215	57227415	+	1	JAHKSE010000051.1	17590	17591	8781137	0	0	0	0	1	0	0	0	0	HPRC_PLUS	male	3140		EUR	PGP - Ashkenazim Jewish	HG002	HG002 1 JAHKSE010000051.1	861	0.727	0.306	0.413	0.629	FALSE	316	Satellite	Satellite
chrY	56673214	56673215	57227415	-	1	JAHKSE010000415.1	171941	171942	231098	0	0	0	0	1	0	0	0	0	HPRC_PLUS	male	3140		EUR	PGP - Ashkenazim Jewish	HG002	HG002 1 JAHKSE010000415.1	862	0.727	0.306	0.413	0.629	FALSE	316	Satellite	Satellite
chrY	56673214	56673215	57227415	-	1	JAHKSE010000383.1	148566	148567	149094	0	0	0	0	1	0	0	0	0	HPRC_PLUS	male	3140		EUR	PGP - Ashkenazim Jewish	HG002	HG002 1 JAHKSE010000383.1	863	0.727	0.306	0.413	0.629	FALSE	316	Satellite	Satellite
chrY	56673214	56673215	57227415	+	1	JAHKSE010000346.1	14840	14841	647037	0	0	0	0	1	0	0	0	0	HPRC_PLUS	male	3140		EUR	PGP - Ashkenazim Jewish	HG002	HG002 1 JAHKSE010000346.1	864	0.727	0.306	0.413	0.629	FALSE	316	Satellite	Satellite
chrY	56677997	56677998	57227415	-	1	JAHKSE010000349.1	355875	355876	357624	0	0	0	0	1	0	0	0	0	HPRC_PLUS	male	3140		EUR	PGP - Ashkenazim Jewish	HG002	HG002 1 JAHKSE010000349.1	865	0.727	0.307	0.413	0.631	FALSE	316	10% Low Complexity	Satellite
chrY	56678239	56678240	57227415	+	1	JAHKSE010000221.1	0	1	612057	0	0	0	0	1	0	0	0	0	HPRC_PLUS	male	3140		EUR	PGP - Ashkenazim Jewish	HG002	HG002 1 JAHKSE010000221.1	866	0.727	0.307	0.413	0.631	FALSE	316	10% Low Complexity	Satellite
chrY	56683737	56683738	57227415	+	1	JAHKSE010000291.1	0	1	85483	0	0	0	0	1	0	0	0	0	HPRC_PLUS	male	3140		EUR	PGP - Ashkenazim Jewish	HG002	HG002 1 JAHKSE010000291.1	867	0.728	0.307	0.413	0.631	FALSE	316	10% Low Complexity	Satellite
chrY	56712035	56712036	57227415	-	1	JAHKSE010000508.1	50824	50825	50825	0	0	0	0	1	0	0	0	0	HPRC_PLUS	male	3140		EUR	PGP - Ashkenazim Jewish	HG002	HG002 1 JAHKSE010000508.1	868	0.731	0.309	0.415	0.63	FALSE	316	10% Low Complexity	Satellite
chrY	56713943	56713944	57227415	+	1	JAHKSE010000138.1	0	1	298166	0	0	0	0	1	0	0	0	0	HPRC_PLUS	male	3140		EUR	PGP - Ashkenazim Jewish	HG002	HG002 1 JAHKSE010000138.1	869	0.731	0.309	0.415	0.63	FALSE	316	10% Low Complexity	Satellite
chrY	56715528	56715529	57227415	-	1	JAHKSE010000223.1	2034848	2034849	2034849	0	0	0	0	1	0	0	0	0	HPRC_PLUS	male	3140		EUR	PGP - Ashkenazim Jewish	HG002	HG002 1 JAHKSE010000223.1	870	0.731	0.309	0.415	0.63	FALSE	316	10% Low Complexity	Satellite
chrY	56722775	56722776	57227415	-	1	JAHKSE010000040.1	1615355	1615356	1615356	0	0	0	0	1	0	0	0	0	HPRC_PLUS	male	3140		EUR	PGP - Ashkenazim Jewish	HG002	HG002 1 JAHKSE010000040.1	871	0.73	0.308	0.415	0.63	FALSE	316	10% Low Complexity	Satellite
chrY	56734619	56734620	57227415	-	1	JAHKSE010000383.1	0	1	149094	0	0	0	0	1	0	0	0	0	HPRC_PLUS	male	3140		EUR	PGP - Ashkenazim Jewish	HG002	HG002 1 JAHKSE010000383.1	872	0.728	0.308	0.413	0.63	FALSE	316	10% Low Complexity	Satellite
chrY	56735457	56735458	57227415	+	1	JAHKSE010000103.1	5187116	5187117	5211459	0	0	0	0	1	0	0	0	0	HPRC_PLUS	male	3140		EUR	PGP - Ashkenazim Jewish	HG002	HG002 1 JAHKSE010000103.1	873	0.728	0.308	0.413	0.63	FALSE	316	10% Low Complexity	Satellite
chrY	56765887	56765888	57227415	-	1	JAHKSE010000508.1	0	1	50825	0	0	0	0	1	0	0	0	0	HPRC_PLUS	male	3140		EUR	PGP - Ashkenazim Jewish	HG002	HG002 1 JAHKSE010000508.1	874	0.73	0.31	0.414	0.632	FALSE	316	10% Low Complexity	Satellite
chrY	56770409	56770410	57227415	-	1	JAHKSE010000223.1	0	1	2034849	0	0	0	0	1	0	0	0	0	HPRC_PLUS	male	3140		EUR	PGP - Ashkenazim Jewish	HG002	HG002 1 JAHKSE010000223.1	875	0.728	0.31	0.414	0.629	FALSE	316	Satellite	Satellite
chrY	56770702	56770703	57227415	+	1	JAHKSE010000291.1	85482	85483	85483	0	0	0	0	1	0	0	0	0	HPRC_PLUS	male	3140		EUR	PGP - Ashkenazim Jewish	HG002	HG002 1 JAHKSE010000291.1	876	0.728	0.31	0.414	0.629	FALSE	316	Satellite	Satellite
chrY	56771047	56771048	57227415	+	1	JAHKSE010000221.1	559676	559677	612057	0	0	0	0	1	0	0	0	0	HPRC_PLUS	male	3140		EUR	PGP - Ashkenazim Jewish	HG002	HG002 1 JAHKSE010000221.1	877	0.728	0.31	0.414	0.629	FALSE	316	Satellite	Satellite
chrY	56771508	56771509	57227415	-	1	JAHKSE010000428.1	1656	1657	300827	0	0	0	0	1	0	0	0	0	HPRC_PLUS	male	3140		EUR	PGP - Ashkenazim Jewish	HG002	HG002 1 JAHKSE010000428.1	878	0.728	0.31	0.414	0.629	FALSE	316	other	other
chrY	56771508	56771509	57227415	-	1	JAHKSE010000424.1	10110	10111	551629	0	0	0	0	1	0	0	0	0	HPRC_PLUS	male	3140		EUR	PGP - Ashkenazim Jewish	HG002	HG002 1 JAHKSE010000424.1	879	0.728	0.31	0.414	0.629	FALSE	316	other	other
chrY	56771508	56771509	57227415	+	1	JAHKSE010000421.1	296094	296095	297359	0	0	0	0	1	0	0	0	0	HPRC_PLUS	male	3140		EUR	PGP - Ashkenazim Jewish	HG002	HG002 1 JAHKSE010000421.1	880	0.728	0.31	0.414	0.629	FALSE	316	other	other
chrY	56771508	56771509	57227415	-	1	JAHKSE010000415.1	1899	1900	231098	0	0	0	0	1	0	0	0	0	HPRC_PLUS	male	3140		EUR	PGP - Ashkenazim Jewish	HG002	HG002 1 JAHKSE010000415.1	881	0.728	0.31	0.414	0.629	FALSE	316	other	other
chrY	56771508	56771509	57227415	+	1	JAHKSE010000346.1	643542	643543	647037	0	0	0	0	1	0	0	0	0	HPRC_PLUS	male	3140		EUR	PGP - Ashkenazim Jewish	HG002	HG002 1 JAHKSE010000346.1	882	0.728	0.31	0.414	0.629	FALSE	316	other	other
chrY	56771508	56771509	57227415	+	1	JAHKSE010000284.1	1342803	1342804	1355814	0	0	0	0	1	0	0	0	0	HPRC_PLUS	male	3140		EUR	PGP - Ashkenazim Jewish	HG002	HG002 1 JAHKSE010000284.1	883	0.728	0.31	0.414	0.629	FALSE	316	other	other
chrY	56771508	56771509	57227415	+	1	JAHKSE010000204.1	298988	298989	302576	0	0	0	0	1	0	0	0	0	HPRC_PLUS	male	3140		EUR	PGP - Ashkenazim Jewish	HG002	HG002 1 JAHKSE010000204.1	884	0.728	0.31	0.414	0.629	FALSE	316	other	other
chrY	56771508	56771509	57227415	+	1	JAHKSE010000141.1	222313	222314	234918	0	0	0	0	1	0	0	0	0	HPRC_PLUS	male	3140		EUR	PGP - Ashkenazim Jewish	HG002	HG002 1 JAHKSE010000141.1	885	0.728	0.31	0.414	0.629	FALSE	316	other	other
chrY	56771508	56771509	57227415	+	1	JAHKSE010000138.1	281747	281748	298166	0	0	0	0	1	0	0	0	0	HPRC_PLUS	male	3140		EUR	PGP - Ashkenazim Jewish	HG002	HG002 1 JAHKSE010000138.1	886	0.728	0.31	0.414	0.629	FALSE	316	other	other
chrY	56771508	56771509	57227415	-	1	JAHKSE010000040.1	3132	3133	1615356	0	0	0	0	1	0	0	0	0	HPRC_PLUS	male	3140		EUR	PGP - Ashkenazim Jewish	HG002	HG002 1 JAHKSE010000040.1	887	0.728	0.31	0.414	0.629	FALSE	316	other	other
chrY	57217319	57217320	57227415	-	1	JAHKSE010000010.1	5402	5403	950896	0	0	0	0	1	0	0	0	0	HPRC_PLUS	male	3140		EUR	PGP - Ashkenazim Jewish	HG002	HG002 1 JAHKSE010000010.1	888	0.683	0.554	0.719	0.502	FALSE	19	Chromosome end	Chromosome end or Poisson
chr1	862192	862193	248387328	+	2	JAHKSD010000021.1	0	1	129018371	0	0	0	0	1	0	0	0	0	HPRC_PLUS	male	3140		EUR	PGP - Ashkenazim Jewish	HG002	HG002 2 JAHKSD010000021.1	889	0.842	0.851	0.784	0.551	FALSE	138	High GA/TC (80%)	High GA/TC (80%)
chr1	120296070	120296071	248387328	+	2	JAHKSD010000313.1	0	1	50233	0	0	0	0	1	0	0	0	0	HPRC_PLUS	male	3140		EUR	PGP - Ashkenazim Jewish	HG002	HG002 2 JAHKSD010000313.1	890	0.634	0.607	0.56	0.682	FALSE	3	SD	SD and High GA/TC (80%)
chr1	120345861	120345862	248387328	+	2	JAHKSD010000313.1	50232	50233	50233	0	0	0	0	1	0	0	0	0	HPRC_PLUS	male	3140		EUR	PGP - Ashkenazim Jewish	HG002	HG002 2 JAHKSD010000313.1	891	0.605	0.545	0.662	0.724	FALSE	3	SD	SD and High GA/TC (80%)
chr1	129149999	129150000	248387328	+	2	JAHKSD010000161.1	8829076	8829077	9260642	0	0	0	0	1	0	0	0	0	HPRC_PLUS	male	3140		EUR	PGP - Ashkenazim Jewish	HG002	HG002 2 JAHKSD010000161.1	892	0.623	0.398	0.375	0.652	FALSE	6	Satellite	Satellite
chr1	133592039	133592040	248387328	-	2	JAHKSD010000198.1	703071	703072	720801	0	0	0	0	1	0	0	0	0	HPRC_PLUS	male	3140		EUR	PGP - Ashkenazim Jewish	HG002	HG002 2 JAHKSD010000198.1	893	0.631	0.391	0.38	0.649	FALSE	7	Satellite	Satellite
chr1	134696811	134696812	248387328	-	2	JAHKSD010000319.1	71695	71696	71696	0	0	0	0	1	0	0	0	0	HPRC_PLUS	male	3140		EUR	PGP - Ashkenazim Jewish	HG002	HG002 2 JAHKSD010000319.1	894	0.626	0.397	0.383	0.646	FALSE	5	Satellite	Satellite
chr1	134715453	134715454	248387328	+	2	JAHKSD010000021.1	129018370	129018371	129018371	0	0	0	0	1	0	0	0	0	HPRC_PLUS	male	3140		EUR	PGP - Ashkenazim Jewish	HG002	HG002 2 JAHKSD010000021.1	895	0.625	0.395	0.38	0.646	FALSE	5	Satellite	Satellite
chr1	134766317	134766318	248387328	-	2	JAHKSD010000319.1	0	1	71696	0	0	0	0	1	0	0	0	0	HPRC_PLUS	male	3140		EUR	PGP - Ashkenazim Jewish	HG002	HG002 2 JAHKSD010000319.1	896	0.626	0.396	0.381	0.647	FALSE	4	Satellite	Satellite
chr1	136652646	136652647	248387328	-	2	JAHKSD010000201.1	2048	2049	2037796	0	0	0	0	1	0	0	0	0	HPRC_PLUS	male	3140		EUR	PGP - Ashkenazim Jewish	HG002	HG002 2 JAHKSD010000201.1	897	0.624	0.391	0.377	0.643	FALSE	8	other	other
chr1	138227921	138227922	248387328	+	2	JAHKSD010000300.1	345311	345312	374535	0	0	0	0	1	0	0	0	0	HPRC_PLUS	male	3140		EUR	PGP - Ashkenazim Jewish	HG002	HG002 2 JAHKSD010000300.1	898	0.626	0.392	0.381	0.644	FALSE	26	Satellite	Satellite
chr1	138302975	138302976	248387328	-	2	JAHKSD010000204.1	1135719	1135720	1135720	0	0	0	0	1	0	0	0	0	HPRC_PLUS	male	3140		EUR	PGP - Ashkenazim Jewish	HG002	HG002 2 JAHKSD010000204.1	899	0.626	0.394	0.38	0.644	FALSE	20	Satellite	Satellite
chr1	138594195	138594196	248387328	+	2	JAHKSD010000178.1	6924	6925	423729	0	0	0	0	1	0	0	0	0	HPRC_PLUS	male	3140		EUR	PGP - Ashkenazim Jewish	HG002	HG002 2 JAHKSD010000178.1	900	0.628	0.392	0.382	0.645	FALSE	17	Satellite	Satellite
chr1	138597061	138597062	248387328	+	2	JAHKSD010000179.1	0	1	642596	0	0	0	0	1	0	0	0	0	HPRC_PLUS	male	3140		EUR	PGP - Ashkenazim Jewish	HG002	HG002 2 JAHKSD010000179.1	901	0.626	0.392	0.382	0.644	FALSE	17	Satellite	Satellite
chr1	138598678	138598679	248387328	+	2	JAHKSD010000331.1	387034	387035	387295	0	0	0	0	1	0	0	0	0	HPRC_PLUS	male	3140		EUR	PGP - Ashkenazim Jewish	HG002	HG002 2 JAHKSD010000331.1	902	0.626	0.392	0.382	0.644	FALSE	17	Satellite	Satellite
chr1	138605094	138605095	248387328	+	2	JAHKSD010000331.1	0	1	387295	0	0	0	0	1	0	0	0	0	HPRC_PLUS	male	3140		EUR	PGP - Ashkenazim Jewish	HG002	HG002 2 JAHKSD010000331.1	903	0.626	0.392	0.38	0.644	FALSE	16	Satellite	Satellite
chr1	138609369	138609370	248387328	-	2	JAHKSD010000198.1	0	1	720801	0	0	0	0	1	0	0	0	0	HPRC_PLUS	male	3140		EUR	PGP - Ashkenazim Jewish	HG002	HG002 2 JAHKSD010000198.1	904	0.626	0.393	0.38	0.644	FALSE	16	Satellite	Satellite
chr1	138610821	138610822	248387328	+	2	JAHKSD010000300.1	4771	4772	374535	0	0	0	0	1	0	0	0	0	HPRC_PLUS	male	3140		EUR	PGP - Ashkenazim Jewish	HG002	HG002 2 JAHKSD010000300.1	905	0.626	0.393	0.38	0.644	FALSE	16	Satellite	Satellite
chr1	139051126	139051127	248387328	+	2	JAHKSD010000178.1	418221	418222	423729	0	0	0	0	1	0	0	0	0	HPRC_PLUS	male	3140		EUR	PGP - Ashkenazim Jewish	HG002	HG002 2 JAHKSD010000178.1	906	0.628	0.39	0.378	0.646	FALSE	15	Satellite	Satellite
chr1	139313998	139313999	248387328	+	2	JAHKSD010000315.1	0	1	148487	0	0	0	0	1	0	0	0	0	HPRC_PLUS	male	3140		EUR	PGP - Ashkenazim Jewish	HG002	HG002 2 JAHKSD010000315.1	907	0.627	0.393	0.38	0.644	FALSE	35	Satellite	Satellite
chr1	139416982	139416983	248387328	-	2	JAHKSD010000201.1	2021122	2021123	2037796	0	0	0	0	1	0	0	0	0	HPRC_PLUS	male	3140		EUR	PGP - Ashkenazim Jewish	HG002	HG002 2 JAHKSD010000201.1	908	0.626	0.391	0.38	0.644	FALSE	34	Satellite	Satellite
chr1	139418495	139418496	248387328	-	2	JAHKSD010000204.1	1042	1043	1135720	0	0	0	0	1	0	0	0	0	HPRC_PLUS	male	3140		EUR	PGP - Ashkenazim Jewish	HG002	HG002 2 JAHKSD010000204.1	909	0.626	0.391	0.38	0.644	FALSE	33	Satellite	Satellite
chr1	139432545	139432546	248387328	+	2	JAHKSD010000161.1	0	1	9260642	0	0	0	0	1	0	0	0	0	HPRC_PLUS	male	3140		EUR	PGP - Ashkenazim Jewish	HG002	HG002 2 JAHKSD010000161.1	910	0.625	0.392	0.38	0.643	FALSE	31	Satellite	Satellite
chr1	139438023	139438024	248387328	+	2	JAHKSD010000315.1	141433	141434	148487	0	0	0	0	1	0	0	0	0	HPRC_PLUS	male	3140		EUR	PGP - Ashkenazim Jewish	HG002	HG002 2 JAHKSD010000315.1	911	0.627	0.392	0.38	0.644	FALSE	30	Satellite	Satellite
chr1	139495577	139495578	248387328	+	2	JAHKSD010000179.1	642593	642594	642596	0	0	0	0	1	0	0	0	0	HPRC_PLUS	male	3140		EUR	PGP - Ashkenazim Jewish	HG002	HG002 2 JAHKSD010000179.1	912	0.63	0.393	0.379	0.648	FALSE	25	Satellite	Satellite
chr1	140199032	140199033	248387328	+	2	JAHKSD010000180.1	743009	743010	2934753	0	0	0	0	1	0	0	0	0	HPRC_PLUS	male	3140		EUR	PGP - Ashkenazim Jewish	HG002	HG002 2 JAHKSD010000180.1	913	0.634	0.394	0.379	0.654	FALSE	28	Satellite	Satellite
chr1	140425604	140425605	248387328	+	2	JAHKSD010000180.1	1081452	1081453	2934753	0	0	0	0	1	0	0	0	0	HPRC_PLUS	male	3140		EUR	PGP - Ashkenazim Jewish	HG002	HG002 2 JAHKSD010000180.1	914	0.631	0.39	0.376	0.643	FALSE	2	Poisson breaks	Chromosome end or Poisson
chr1	141806720	141806721	248387328	+	2	JAHKSD010000209.1	7	8	1058509	0	0	0	0	1	0	0	0	0	HPRC_PLUS	male	3140		EUR	PGP - Ashkenazim Jewish	HG002	HG002 2 JAHKSD010000209.1	915	0.632	0.389	0.377	0.643	FALSE	6	Satellite	Satellite
chr1	142881615	142881616	248387328	+	2	JAHKSD010000230.1	0	1	148044	0	0	0	0	1	0	0	0	0	HPRC_PLUS	male	3140		EUR	PGP - Ashkenazim Jewish	HG002	HG002 2 JAHKSD010000230.1	916	0.627	0.586	0.552	0.676	FALSE	7	SD	SD and High GA/TC (80%)
chr1	142882631	142882632	248387328	+	2	JAHKSD010000302.1	0	1	148613	0	0	0	0	1	0	0	0	0	HPRC_PLUS	male	3140		EUR	PGP - Ashkenazim Jewish	HG002	HG002 2 JAHKSD010000302.1	917	0.627	0.568	0.552	0.676	FALSE	7	SD	SD and High GA/TC (80%)
chr1	142898543	142898544	248387328	+	2	JAHKSD010000209.1	1058508	1058509	1058509	0	0	0	0	1	0	0	0	0	HPRC_PLUS	male	3140		EUR	PGP - Ashkenazim Jewish	HG002	HG002 2 JAHKSD010000209.1	918	0.617	0.602	0.499	0.671	FALSE	7	SD	SD and High GA/TC (80%)
chr1	142900101	142900102	248387328	+	2	JAHKSD010000187.1	749416	749417	749417	0	0	0	0	1	0	0	0	0	HPRC_PLUS	male	3140		EUR	PGP - Ashkenazim Jewish	HG002	HG002 2 JAHKSD010000187.1	919	0.617	0.602	0.511	0.682	FALSE	7	SD	SD and High GA/TC (80%)
chr1	143013182	143013183	248387328	+	2	JAHKSD010000187.1	0	1	749417	0	0	0	0	1	0	0	0	0	HPRC_PLUS	male	3140		EUR	PGP - Ashkenazim Jewish	HG002	HG002 2 JAHKSD010000187.1	920	0.591	0.564	0.51	0.664	FALSE	7	SD	SD and High GA/TC (80%)
chr1	143029650	143029651	248387328	+	2	JAHKSD010000230.1	148043	148044	148044	0	0	0	0	1	0	0	0	0	HPRC_PLUS	male	3140		EUR	PGP - Ashkenazim Jewish	HG002	HG002 2 JAHKSD010000230.1	921	0.575	0.571	0.495	0.679	FALSE	7	SD	SD and High GA/TC (80%)
chr1	143031230	143031231	248387328	+	2	JAHKSD010000302.1	148612	148613	148613	0	0	0	0	1	0	0	0	0	HPRC_PLUS	male	3140		EUR	PGP - Ashkenazim Jewish	HG002	HG002 2 JAHKSD010000302.1	922	0.575	0.571	0.495	0.684	FALSE	7	SD	SD and High GA/TC (80%)
chr1	143302794	143302795	248387328	+	2	JAHKSD010000229.1	0	1	426493	0	0	0	0	1	0	0	0	0	HPRC_PLUS	male	3140		EUR	PGP - Ashkenazim Jewish	HG002	HG002 2 JAHKSD010000229.1	923	0.64	0.596	0.554	0.671	FALSE	16	SD	SD and High GA/TC (80%)
chr1	143688750	143688751	248387328	+	2	JAHKSD010000006.1	0	1	104451682	0	0	0	0	1	0	0	0	0	HPRC_PLUS	male	3140		EUR	PGP - Ashkenazim Jewish	HG002	HG002 2 JAHKSD010000006.1	924	0.642	0.6	0.444	0.739	FALSE	12	SD	SD and High GA/TC (80%)
chr1	143729304	143729305	248387328	+	2	JAHKSD010000229.1	426492	426493	426493	0	0	0	0	1	0	0	0	0	HPRC_PLUS	male	3140		EUR	PGP - Ashkenazim Jewish	HG002	HG002 2 JAHKSD010000229.1	925	0.614	0.774	0.423	0.747	FALSE	13	SD	SD and High GA/TC (80%)
chr1	148975519	148975520	248387328	-	2	JAHKSD010000404.1	62913	62914	62914	0	0	0	0	1	0	0	0	0	HPRC_PLUS	male	3140		EUR	PGP - Ashkenazim Jewish	HG002	HG002 2 JAHKSD010000404.1	926	0.605	0.61	0.681	0.679	FALSE	43	SD	SD and High GA/TC (80%)
chr1	149038449	149038450	248387328	-	2	JAHKSD010000404.1	0	1	62914	0	0	0	0	1	0	0	0	0	HPRC_PLUS	male	3140		EUR	PGP - Ashkenazim Jewish	HG002	HG002 2 JAHKSD010000404.1	927	0.64	0.609	0.604	0.612	FALSE	40	other	other
chr1	248383755	248383756	248387328	+	2	JAHKSD010000006.1	104442756	104442757	104451682	0	0	0	0	1	0	0	0	0	HPRC_PLUS	male	3140		EUR	PGP - Ashkenazim Jewish	HG002	HG002 2 JAHKSD010000006.1	928	0.722	0.565	0.7	0.692	FALSE	94	Chromosome end	Chromosome end or Poisson
chr10	0	1	134758134	+	2	JAHKSD010000066.1	5941	5942	23953416	0	0	0	0	1	0	0	0	0	HPRC_PLUS	male	3140		EUR	PGP - Ashkenazim Jewish	HG002	HG002 2 JAHKSD010000066.1	929	0.656	0.672	0.897	0.703	FALSE	94	Chromosome end	Chromosome end or Poisson
chr10	23948328	23948329	134758134	+	2	JAHKSD010000029.1	0	1	15540184	0	0	0	0	1	0	0	0	0	HPRC_PLUS	male	3140		EUR	PGP - Ashkenazim Jewish	HG002	HG002 2 JAHKSD010000029.1	930	0.6	0.579	0.476	0.68	FALSE	2	Poisson breaks	Chromosome end or Poisson
chr10	23956294	23956295	134758134	+	2	JAHKSD010000066.1	23953415	23953416	23953416	0	0	0	0	1	0	0	0	0	HPRC_PLUS	male	3140		EUR	PGP - Ashkenazim Jewish	HG002	HG002 2 JAHKSD010000066.1	931	0.609	0.579	0.472	0.727	FALSE	2	Poisson breaks	Chromosome end or Poisson
chr10	39409100	39409101	134758134	+	2	JAHKSD010000029.1	15514738	15514739	15540184	0	0	0	0	1	0	0	0	0	HPRC_PLUS	male	3140		EUR	PGP - Ashkenazim Jewish	HG002	HG002 2 JAHKSD010000029.1	932	0.56	0.561	0.405	0.652	FALSE	2	Poisson breaks	Chromosome end or Poisson
chr10	39432076	39432077	134758134	-	2	JAHKSD010000069.1	8291445	8291446	8300134	0	0	0	0	1	0	0	0	0	HPRC_PLUS	male	3140		EUR	PGP - Ashkenazim Jewish	HG002	HG002 2 JAHKSD010000069.1	933	0.606	0.634	0.503	0.655	FALSE	3	Alpha	Satellite
chr10	41039363	41039364	134758134	+	2	JAHKSD010000225.1	38025	38026	235263	0	0	0	0	1	0	0	0	0	HPRC_PLUS	male	3140		EUR	PGP - Ashkenazim Jewish	HG002	HG002 2 JAHKSD010000225.1	934	0.494	0.527	0.388	0.626	FALSE	48	Alpha	Satellite
chr10	41071479	41071480	134758134	+	2	JAHKSD010000225.1	70450	70451	235263	0	0	0	0	1	0	0	0	0	HPRC_PLUS	male	3140		EUR	PGP - Ashkenazim Jewish	HG002	HG002 2 JAHKSD010000225.1	935	0.493	0.526	0.389	0.633	FALSE	50	Alpha	Satellite
chr10	47039183	47039184	134758134	-	2	JAHKSD010000235.1	0	1	691827	0	0	0	0	1	0	0	0	0	HPRC_PLUS	male	3140		EUR	PGP - Ashkenazim Jewish	HG002	HG002 2 JAHKSD010000235.1	936	0.575	0.611	0.546	0.825	FALSE	4	SD	SD and High GA/TC (80%)
chr10	47393713	47393714	134758134	-	2	JAHKSD010000069.1	0	1	8300134	0	0	0	0	1	0	0	0	0	HPRC_PLUS	male	3140		EUR	PGP - Ashkenazim Jewish	HG002	HG002 2 JAHKSD010000069.1	937	0.595	0.627	0.578	0.719	FALSE	4	SD	SD and High GA/TC (80%)
chr10	47730739	47730740	134758134	-	2	JAHKSD010000235.1	691826	691827	691827	100	100	100	1	0	0	0	0	0	HPRC_PLUS	male	3140		EUR	PGP - Ashkenazim Jewish	HG002	HG002 2 JAHKSD010000235.1	938	0.605	0.549	0.62	0.717	FALSE	3	SD	SD and High GA/TC (80%)
chr10	47731957	47731958	134758134	-	2	JAHKSD010000090.1	62885597	62885598	62885598	0	0	0	0	1	0	0	0	0	HPRC_PLUS	male	3140		EUR	PGP - Ashkenazim Jewish	HG002	HG002 2 JAHKSD010000090.1	939	0.605	0.549	0.62	0.717	FALSE	3	SD	SD and High GA/TC (80%)
chr10	110557055	110557056	134758134	-	2	JAHKSD010000053.1	24138507	24138508	24138508	0	0	0	0	1	0	0	0	0	HPRC_PLUS	male	3140		EUR	PGP - Ashkenazim Jewish	HG002	HG002 2 JAHKSD010000053.1	940	0.616	0.626	0.605	0.704	FALSE	2	Poisson breaks	Chromosome end or Poisson
chr10	110569551	110569552	134758134	-	2	JAHKSD010000090.1	0	1	62885598	0	0	0	0	1	0	0	0	0	HPRC_PLUS	male	3140		EUR	PGP - Ashkenazim Jewish	HG002	HG002 2 JAHKSD010000090.1	941	0.616	0.639	0.545	0.699	FALSE	2	Poisson breaks	Chromosome end or Poisson
chr10	134697062	134697063	134758134	-	2	JAHKSD010000053.1	0	1	24138508	0	0	0	0	1	0	0	0	0	HPRC_PLUS	male	3140		EUR	PGP - Ashkenazim Jewish	HG002	HG002 2 JAHKSD010000053.1	942	0.565	0.571	0.753	0.313	FALSE	257	Chromosome end	Chromosome end or Poisson
chr10	134705062	134705063	134758134	+	2	JAHKSD010000391.1	0	1	52776	0	0	0	0	1	0	0	0	0	HPRC_PLUS	male	3140		EUR	PGP - Ashkenazim Jewish	HG002	HG002 2 JAHKSD010000391.1	943	0.565	0.571	0.756	0.313	FALSE	257	Chromosome end	Chromosome end or Poisson
chr10	134757501	134757502	134758134	+	2	JAHKSD010000391.1	52765	52766	52776	0	0	0	0	1	0	0	0	0	HPRC_PLUS	male	3140		EUR	PGP - Ashkenazim Jewish	HG002	HG002 2 JAHKSD010000391.1	944	0.705882	0.58	0.739	0.673	FALSE	185	Chromosome end	Chromosome end or Poisson
chr11	38366	38367	135127769	+	2	JAHKSD010000023.1	0	1	135195801	0	0	0	0	1	0	0	0	0	HPRC_PLUS	male	3140		EUR	PGP - Ashkenazim Jewish	HG002	HG002 2 JAHKSD010000023.1	945	0.615	0.635	0.536	0.733	FALSE	65	Chromosome end	Chromosome end or Poisson
chr11	135126384	135126385	135127769	+	2	JAHKSD010000023.1	135195800	135195801	135195801	0	0	0	0	1	0	0	0	0	HPRC_PLUS	male	3140		EUR	PGP - Ashkenazim Jewish	HG002	HG002 2 JAHKSD010000023.1	946	0.681159	0.576	0.798	0.623	FALSE	94	Chromosome end	Chromosome end or Poisson
chr12	5544	5545	133324548	-	2	JAHKSD010000013.1	133364667	133364668	133364668	0	0	0	0	1	0	0	0	0	HPRC_PLUS	male	3140		EUR	PGP - Ashkenazim Jewish	HG002	HG002 2 JAHKSD010000013.1	947	0.577	0.675	0.763	0.515	FALSE	96	Chromosome end	Chromosome end or Poisson
chr12	19449	19450	133324548	+	2	JAHKSD010000301.1	0	1	47544	0	0	0	0	1	0	0	0	0	HPRC_PLUS	male	3140		EUR	PGP - Ashkenazim Jewish	HG002	HG002 2 JAHKSD010000301.1	948	0.579	0.606	0.743	0.671	FALSE	96	Chromosome end	Chromosome end or Poisson
chr12	67136	67137	133324548	+	2	JAHKSD010000301.1	47543	47544	47544	0	0	0	0	1	0	0	0	0	HPRC_PLUS	male	3140		EUR	PGP - Ashkenazim Jewish	HG002	HG002 2 JAHKSD010000301.1	949	0.625	0.603	0.717	0.586	FALSE	98	Chromosome end	Chromosome end or Poisson
chr12	34948140	34948141	133324548	-	2	JAHKSD010000223.1	278918	278919	278919	0	0	0	0	1	0	0	0	0	HPRC_PLUS	male	3140		EUR	PGP - Ashkenazim Jewish	HG002	HG002 2 JAHKSD010000223.1	950	0.507	0.512	0.393	0.62	FALSE	144	Alpha	Satellite
chr12	35165067	35165068	133324548	-	2	JAHKSD010000223.1	47689	47690	278919	0	0	0	0	1	0	0	0	0	HPRC_PLUS	male	3140		EUR	PGP - Ashkenazim Jewish	HG002	HG002 2 JAHKSD010000223.1	951	0.507	0.512	0.393	0.621	FALSE	63	Alpha	Satellite
chr12	133324539	133324540	133324548	-	2	JAHKSD010000013.1	6293	6294	133364668	0	0	0	0	1	0	0	0	0	HPRC_PLUS	male	3140		EUR	PGP - Ashkenazim Jewish	HG002	HG002 2 JAHKSD010000013.1	952	0.7	0.581	0.561	0.732	FALSE	95	Chromosome end	Chromosome end or Poisson
chr13	1	2	113566686	+	2	JAHKSD010000077.1	9459	9460	4398498	0	0	0	0	1	0	0	0	0	HPRC_PLUS	male	3140		EUR	PGP - Ashkenazim Jewish	HG002	HG002 2 JAHKSD010000077.1	953	0.754	0.671	0.505	0.601	TRUE	12	Chromosome end	Chromosome end or Poisson
chr13	5152357	5152358	113566686	+	2	JAHKSD010000346.1	0	1	213821	0	0	0	0	1	0	0	0	0	HPRC_PLUS	male	3140		EUR	PGP - Ashkenazim Jewish	HG002	HG002 2 JAHKSD010000346.1	954	0.767	0.602	0.484	0.708	TRUE	2	Poisson breaks	Chromosome end or Poisson
chr13	5357334	5357335	113566686	+	2	JAHKSD010000346.1	205849	205850	213821	0	0	0	0	1	0	0	0	0	HPRC_PLUS	male	3140		EUR	PGP - Ashkenazim Jewish	HG002	HG002 2 JAHKSD010000346.1	955	0.663	0.621	0.58	0.679	TRUE	10	SD	SD and High GA/TC (80%)
chr13	5974103	5974104	113566686	+	2	JAHKSD010000077.1	4398497	4398498	4398498	0	0	0	0	1	0	0	0	0	HPRC_PLUS	male	3140		EUR	PGP - Ashkenazim Jewish	HG002	HG002 2 JAHKSD010000077.1	956	0.561	0.782	0.843	0.529	TRUE	23	SD	SD and High GA/TC (80%)
chr13	8111900	8111901	113566686	-	2	JAHKSD010000398.1	70858	70859	70859	0	0	0	0	1	0	0	0	0	HPRC_PLUS	male	3140		EUR	PGP - Ashkenazim Jewish	HG002	HG002 2 JAHKSD010000398.1	957	0.591	0.884	0.743	0.622	TRUE	14	SD and High GA/TC (80%)	SD and High GA/TC (80%)
chr13	8183694	8183695	113566686	-	2	JAHKSD010000398.1	0	1	70859	0	0	0	0	1	0	0	0	0	HPRC_PLUS	male	3140		EUR	PGP - Ashkenazim Jewish	HG002	HG002 2 JAHKSD010000398.1	958	0.557	0.884	0.839	0.545	TRUE	8	SD and High GA/TC (80%)	SD and High GA/TC (80%)
chr13	8987205	8987206	113566686	+	2	JAHKSD010000292.1	0	1	159444	0	0	0	0	1	0	0	0	0	HPRC_PLUS	male	3140		EUR	PGP - Ashkenazim Jewish	HG002	HG002 2 JAHKSD010000292.1	959	0.553	0.884	0.811	0.543	TRUE	88	SD and High GA/TC (80%)	SD and High GA/TC (80%)
chr13	9035827	9035828	113566686	-	2	JAHKSD010000130.1	86198	86199	86199	0	0	0	0	1	0	0	0	0	HPRC_PLUS	male	3140		EUR	PGP - Ashkenazim Jewish	HG002	HG002 2 JAHKSD010000130.1	960	0.556	0.884	0.8	0.543	TRUE	205	SD and High GA/TC (80%)	SD and High GA/TC (80%)
chr13	9038255	9038256	113566686	-	2	JAHKSD010000101.1	110001	110002	110002	0	0	0	0	1	0	0	0	0	HPRC_PLUS	male	3140		EUR	PGP - Ashkenazim Jewish	HG002	HG002 2 JAHKSD010000101.1	961	0.54	0.884	0.782	0.543	TRUE	216	SD and High GA/TC (80%)	SD and High GA/TC (80%)
chr13	9056834	9056835	113566686	+	2	JAHKSD010000075.1	0	1	281537	0	0	0	0	1	0	0	0	0	HPRC_PLUS	male	3140		EUR	PGP - Ashkenazim Jewish	HG002	HG002 2 JAHKSD010000075.1	962	0.591	0.852	0.841	0.622	TRUE	331	SD and High GA/TC (80%)	SD and High GA/TC (80%)
chr13	9099937	9099938	113566686	-	2	JAHKSD010000410.1	56979	56980	56980	0	0	0	0	1	0	0	0	0	HPRC_PLUS	male	3140		EUR	PGP - Ashkenazim Jewish	HG002	HG002 2 JAHKSD010000410.1	963	0.588	0.884	0.775	0.623	TRUE	709	SD and High GA/TC (80%)	SD and High GA/TC (80%)
chr13	9109633	9109634	113566686	+	2	JAHKSD010000317.1	0	1	30550	0	0	0	0	1	0	0	0	0	HPRC_PLUS	male	3140		EUR	PGP - Ashkenazim Jewish	HG002	HG002 2 JAHKSD010000317.1	964	0.588	0.804	0.843	0.589	TRUE	803	SD and High GA/TC (80%)	SD and High GA/TC (80%)
chr13	9124087	9124088	113566686	-	2	JAHKSD010000130.1	0	1	86199	0	0	0	0	1	0	0	0	0	HPRC_PLUS	male	3140		EUR	PGP - Ashkenazim Jewish	HG002	HG002 2 JAHKSD010000130.1	965	0.557	0.881	0.839	0.539	TRUE	1077	SD and High GA/TC (80%)	SD and High GA/TC (80%)
chr13	9124175	9124176	113566686	+	2	JAHKSD010000150.1	0	1	91722	0	0	0	0	1	0	0	0	0	HPRC_PLUS	male	3140		EUR	PGP - Ashkenazim Jewish	HG002	HG002 2 JAHKSD010000150.1	966	0.557	0.881	0.839	0.539	TRUE	1078	SD and High GA/TC (80%)	SD and High GA/TC (80%)
chr13	9127450	9127451	113566686	-	2	JAHKSD010000153.1	91181	91182	91182	0	0	0	0	1	0	0	0	0	HPRC_PLUS	male	3140		EUR	PGP - Ashkenazim Jewish	HG002	HG002 2 JAHKSD010000153.1	967	0.557	0.885	0.813	0.541	TRUE	1146	SD and High GA/TC (80%)	SD and High GA/TC (80%)
chr13	9137840	9137841	113566686	+	2	JAHKSD010000403.1	0	1	39831	0	0	0	0	1	0	0	0	0	HPRC_PLUS	male	3140		EUR	PGP - Ashkenazim Jewish	HG002	HG002 2 JAHKSD010000403.1	968	0.538	0.885	0.605	0.622	TRUE	1283	SD and High GA/TC (80%)	SD and High GA/TC (80%)
chr13	9138265	9138266	113566686	-	2	JAHKSD010000205.1	39857	39858	39858	0	0	0	0	1	0	0	0	0	HPRC_PLUS	male	3140		EUR	PGP - Ashkenazim Jewish	HG002	HG002 2 JAHKSD010000205.1	969	0.538	0.885	0.604	0.622	TRUE	1287	SD and High GA/TC (80%)	SD and High GA/TC (80%)
chr13	9139011	9139012	113566686	+	2	JAHKSD010000409.1	0	1	39377	0	0	0	0	1	0	0	0	0	HPRC_PLUS	male	3140		EUR	PGP - Ashkenazim Jewish	HG002	HG002 2 JAHKSD010000409.1	970	0.538	0.885	0.604	0.622	TRUE	1294	SD and High GA/TC (80%)	SD and High GA/TC (80%)
chr13	9140212	9140213	113566686	+	2	JAHKSD010000317.1	30549	30550	30550	0	0	0	0	1	0	0	0	0	HPRC_PLUS	male	3140		EUR	PGP - Ashkenazim Jewish	HG002	HG002 2 JAHKSD010000317.1	971	0.538	0.885	0.604	0.622	TRUE	1304	SD and High GA/TC (80%)	SD and High GA/TC (80%)
chr13	9148355	9148356	113566686	+	2	JAHKSD010000292.1	159443	159444	159444	0	0	0	0	1	0	0	0	0	HPRC_PLUS	male	3140		EUR	PGP - Ashkenazim Jewish	HG002	HG002 2 JAHKSD010000292.1	972	0.592	0.883	0.839	0.622	TRUE	1396	SD and High GA/TC (80%)	SD and High GA/TC (80%)
chr13	9149133	9149134	113566686	-	2	JAHKSD010000101.1	0	1	110002	0	0	0	0	1	0	0	0	0	HPRC_PLUS	male	3140		EUR	PGP - Ashkenazim Jewish	HG002	HG002 2 JAHKSD010000101.1	973	0.592	0.876	0.839	0.622	TRUE	1401	SD and High GA/TC (80%)	SD and High GA/TC (80%)
chr13	9150713	9150714	113566686	+	2	JAHKSD010000220.1	0	1	135392	0	0	0	0	1	0	0	0	0	HPRC_PLUS	male	3140		EUR	PGP - Ashkenazim Jewish	HG002	HG002 2 JAHKSD010000220.1	974	0.592	0.853	0.839	0.622	TRUE	1416	SD and High GA/TC (80%)	SD and High GA/TC (80%)
chr13	9157012	9157013	113566686	-	2	JAHKSD010000410.1	0	1	56980	0	0	0	0	1	0	0	0	0	HPRC_PLUS	male	3140		EUR	PGP - Ashkenazim Jewish	HG002	HG002 2 JAHKSD010000410.1	975	0.592	0.814	0.84	0.587	TRUE	1507	SD and High GA/TC (80%)	SD and High GA/TC (80%)
chr13	9162473	9162474	113566686	+	2	JAHKSD010000402.1	0	1	28674	0	0	0	0	1	0	0	0	0	HPRC_PLUS	male	3140		EUR	PGP - Ashkenazim Jewish	HG002	HG002 2 JAHKSD010000402.1	976	0.558	0.814	0.84	0.587	TRUE	1597	SD and High GA/TC (80%)	SD and High GA/TC (80%)
chr13	9163829	9163830	113566686	+	2	JAHKSD010000309.1	0	1	35530	0	0	0	0	1	0	0	0	0	HPRC_PLUS	male	3140		EUR	PGP - Ashkenazim Jewish	HG002	HG002 2 JAHKSD010000309.1	977	0.558	0.782	0.84	0.577	TRUE	1603	SD	SD and High GA/TC (80%)
chr13	9179188	9179189	113566686	+	2	JAHKSD010000403.1	39830	39831	39831	0	0	0	0	1	0	0	0	0	HPRC_PLUS	male	3140		EUR	PGP - Ashkenazim Jewish	HG002	HG002 2 JAHKSD010000403.1	978	0.542	0.885	0.764	0.544	TRUE	1663	SD and High GA/TC (80%)	SD and High GA/TC (80%)
chr13	9179635	9179636	113566686	-	2	JAHKSD010000205.1	0	1	39858	0	0	0	0	1	0	0	0	0	HPRC_PLUS	male	3140		EUR	PGP - Ashkenazim Jewish	HG002	HG002 2 JAHKSD010000205.1	979	0.542	0.885	0.662	0.544	TRUE	1663	SD and High GA/TC (80%)	SD and High GA/TC (80%)
chr13	9179903	9179904	113566686	+	2	JAHKSD010000409.1	39376	39377	39377	0	0	0	0	1	0	0	0	0	HPRC_PLUS	male	3140		EUR	PGP - Ashkenazim Jewish	HG002	HG002 2 JAHKSD010000409.1	980	0.542	0.885	0.662	0.544	TRUE	1663	SD and High GA/TC (80%)	SD and High GA/TC (80%)
chr13	9188514	9188515	113566686	-	2	JAHKSD010000210.1	102375	102376	102376	0	0	0	0	1	0	0	0	0	HPRC_PLUS	male	3140		EUR	PGP - Ashkenazim Jewish	HG002	HG002 2 JAHKSD010000210.1	981	0.585	0.885	0.606	0.623	TRUE	1666	SD and High GA/TC (80%)	SD and High GA/TC (80%)
chr13	9192587	9192588	113566686	+	2	JAHKSD010000402.1	28673	28674	28674	0	0	0	0	1	0	0	0	0	HPRC_PLUS	male	3140		EUR	PGP - Ashkenazim Jewish	HG002	HG002 2 JAHKSD010000402.1	982	0.585	0.882	0.774	0.623	TRUE	1669	SD and High GA/TC (80%)	SD and High GA/TC (80%)
chr13	9200682	9200683	113566686	+	2	JAHKSD010000309.1	35529	35530	35530	0	0	0	0	1	0	0	0	0	HPRC_PLUS	male	3140		EUR	PGP - Ashkenazim Jewish	HG002	HG002 2 JAHKSD010000309.1	983	0.585	0.804	0.843	0.623	TRUE	1676	SD and High GA/TC (80%)	SD and High GA/TC (80%)
chr13	9207464	9207465	113566686	-	2	JAHKSD010000162.1	89165	89166	89166	0	0	0	0	1	0	0	0	0	HPRC_PLUS	male	3140		EUR	PGP - Ashkenazim Jewish	HG002	HG002 2 JAHKSD010000162.1	984	0.585	0.804	0.843	0.576	TRUE	1669	SD and High GA/TC (80%)	SD and High GA/TC (80%)
chr13	9212003	9212004	113566686	+	2	JAHKSD010000314.1	0	1	73766	0	0	0	0	1	0	0	0	0	HPRC_PLUS	male	3140		EUR	PGP - Ashkenazim Jewish	HG002	HG002 2 JAHKSD010000314.1	985	0.555	0.78	0.843	0.531	TRUE	1684	SD	SD and High GA/TC (80%)
chr13	9217309	9217310	113566686	+	2	JAHKSD010000150.1	91721	91722	91722	0	0	0	0	1	0	0	0	0	HPRC_PLUS	male	3140		EUR	PGP - Ashkenazim Jewish	HG002	HG002 2 JAHKSD010000150.1	986	0.555	0.883	0.836	0.538	TRUE	1692	SD and High GA/TC (80%)	SD and High GA/TC (80%)
chr13	9217358	9217359	113566686	+	2	JAHKSD010000185.1	35	36	68242	0	0	0	0	1	0	0	0	0	HPRC_PLUS	male	3140		EUR	PGP - Ashkenazim Jewish	HG002	HG002 2 JAHKSD010000185.1	987	0.555	0.883	0.836	0.538	TRUE	1692	SD and High GA/TC (80%)	SD and High GA/TC (80%)
chr13	9221079	9221080	113566686	-	2	JAHKSD010000153.1	0	1	91182	0	0	0	0	1	0	0	0	0	HPRC_PLUS	male	3140		EUR	PGP - Ashkenazim Jewish	HG002	HG002 2 JAHKSD010000153.1	988	0.555	0.883	0.812	0.541	TRUE	1697	SD and High GA/TC (80%)	SD and High GA/TC (80%)
chr13	9230597	9230598	113566686	+	2	JAHKSD010000416.1	0	1	51581	0	0	0	0	1	0	0	0	0	HPRC_PLUS	male	3140		EUR	PGP - Ashkenazim Jewish	HG002	HG002 2 JAHKSD010000416.1	989	0.533	0.883	0.607	0.635	TRUE	1681	SD and High GA/TC (80%)	SD and High GA/TC (80%)
chr13	9233745	9233746	113566686	+	2	JAHKSD010000281.1	0	1	71918	0	0	0	0	1	0	0	0	0	HPRC_PLUS	male	3140		EUR	PGP - Ashkenazim Jewish	HG002	HG002 2 JAHKSD010000281.1	990	0.59	0.883	0.607	0.635	TRUE	1673	SD and High GA/TC (80%)	SD and High GA/TC (80%)
chr13	9237400	9237401	113566686	+	2	JAHKSD010000157.1	0	1	27749	0	0	0	0	1	0	0	0	0	HPRC_PLUS	male	3140		EUR	PGP - Ashkenazim Jewish	HG002	HG002 2 JAHKSD010000157.1	991	0.59	0.882	0.775	0.635	TRUE	1661	SD and High GA/TC (80%)	SD and High GA/TC (80%)
chr13	9265085	9265086	113566686	+	2	JAHKSD010000157.1	27748	27749	27749	0	0	0	0	1	0	0	0	0	HPRC_PLUS	male	3140		EUR	PGP - Ashkenazim Jewish	HG002	HG002 2 JAHKSD010000157.1	992	0.557	0.885	0.808	0.545	TRUE	1461	SD and High GA/TC (80%)	SD and High GA/TC (80%)
chr13	9279319	9279320	113566686	+	2	JAHKSD010000416.1	48996	48997	51581	0	0	0	0	1	0	0	0	0	HPRC_PLUS	male	3140		EUR	PGP - Ashkenazim Jewish	HG002	HG002 2 JAHKSD010000416.1	993	0.536	0.885	0.604	0.642	TRUE	1376	SD and High GA/TC (80%)	SD and High GA/TC (80%)
chr13	9280033	9280034	113566686	-	2	JAHKSD010000014.1	2673290	2673291	2673291	0	0	0	0	1	0	0	0	0	HPRC_PLUS	male	3140		EUR	PGP - Ashkenazim Jewish	HG002	HG002 2 JAHKSD010000014.1	994	0.536	0.885	0.604	0.642	TRUE	1368	SD and High GA/TC (80%)	SD and High GA/TC (80%)
chr13	9285153	9285154	113566686	+	2	JAHKSD010000432.1	0	1	33522	0	0	0	0	1	0	0	0	0	HPRC_PLUS	male	3140		EUR	PGP - Ashkenazim Jewish	HG002	HG002 2 JAHKSD010000432.1	995	0.599	0.881	0.77	0.642	TRUE	1319	SD and High GA/TC (80%)	SD and High GA/TC (80%)
chr13	9286724	9286725	113566686	-	2	JAHKSD010000237.1	36339	36340	36340	0	0	0	0	1	0	0	0	0	HPRC_PLUS	male	3140		EUR	PGP - Ashkenazim Jewish	HG002	HG002 2 JAHKSD010000237.1	996	0.599	0.881	0.773	0.642	TRUE	1303	SD and High GA/TC (80%)	SD and High GA/TC (80%)
chr13	9290302	9290303	113566686	+	2	JAHKSD010000314.1	73763	73764	73766	0	0	0	0	1	0	0	0	0	HPRC_PLUS	male	3140		EUR	PGP - Ashkenazim Jewish	HG002	HG002 2 JAHKSD010000314.1	997	0.599	0.849	0.843	0.642	TRUE	1259	SD and High GA/TC (80%)	SD and High GA/TC (80%)
chr13	9290811	9290812	113566686	+	2	JAHKSD010000185.1	68241	68242	68242	0	0	0	0	1	0	0	0	0	HPRC_PLUS	male	3140		EUR	PGP - Ashkenazim Jewish	HG002	HG002 2 JAHKSD010000185.1	998	0.599	0.849	0.843	0.642	TRUE	1253	SD and High GA/TC (80%)	SD and High GA/TC (80%)
chr13	9291944	9291945	113566686	+	2	JAHKSD010000220.1	135391	135392	135392	0	0	0	0	1	0	0	0	0	HPRC_PLUS	male	3140		EUR	PGP - Ashkenazim Jewish	HG002	HG002 2 JAHKSD010000220.1	999	0.599	0.849	0.843	0.642	TRUE	1231	SD and High GA/TC (80%)	SD and High GA/TC (80%)
chr13	9293868	9293869	113566686	-	2	JAHKSD010000162.1	0	1	89166	0	0	0	0	1	0	0	0	0	HPRC_PLUS	male	3140		EUR	PGP - Ashkenazim Jewish	HG002	HG002 2 JAHKSD010000162.1	1000	0.599	0.809	0.843	0.642	TRUE	1208	SD and High GA/TC (80%)	SD and High GA/TC (80%)
chr13	9295941	9295942	113566686	-	2	JAHKSD010000210.1	0	1	102376	0	0	0	0	1	0	0	0	0	HPRC_PLUS	male	3140		EUR	PGP - Ashkenazim Jewish	HG002	HG002 2 JAHKSD010000210.1	1001	0.599	0.809	0.843	0.589	TRUE	1187	SD and High GA/TC (80%)	SD and High GA/TC (80%)
chr13	9309938	9309939	113566686	+	2	JAHKSD010000281.1	71870	71871	71918	0	0	0	0	1	0	0	0	0	HPRC_PLUS	male	3140		EUR	PGP - Ashkenazim Jewish	HG002	HG002 2 JAHKSD010000281.1	1002	0.557	0.883	0.835	0.537	TRUE	1056	SD and High GA/TC (80%)	SD and High GA/TC (80%)
chr13	9319367	9319368	113566686	+	2	JAHKSD010000432.1	33521	33522	33522	0	0	0	0	1	0	0	0	0	HPRC_PLUS	male	3140		EUR	PGP - Ashkenazim Jewish	HG002	HG002 2 JAHKSD010000432.1	1003	0.53	0.883	0.778	0.541	TRUE	873	SD and High GA/TC (80%)	SD and High GA/TC (80%)
chr13	9322932	9322933	113566686	-	2	JAHKSD010000237.1	0	1	36340	0	0	0	0	1	0	0	0	0	HPRC_PLUS	male	3140		EUR	PGP - Ashkenazim Jewish	HG002	HG002 2 JAHKSD010000237.1	1004	0.53	0.883	0.605	0.622	TRUE	806	SD and High GA/TC (80%)	SD and High GA/TC (80%)
chr13	9337445	9337446	113566686	+	2	JAHKSD010000075.1	281536	281537	281537	0	0	0	0	1	0	0	0	0	HPRC_PLUS	male	3140		EUR	PGP - Ashkenazim Jewish	HG002	HG002 2 JAHKSD010000075.1	1005	0.596	0.851	0.843	0.622	TRUE	573	SD and High GA/TC (80%)	SD and High GA/TC (80%)
chr13	11246761	11246762	113566686	+	2	JAHKSD010000105.1	0	1	4104114	0	0	0	0	1	0	0	0	0	HPRC_PLUS	male	3140		EUR	PGP - Ashkenazim Jewish	HG002	HG002 2 JAHKSD010000105.1	1006	0.516	0.634	0.519	0.655	TRUE	10	SD	SD and High GA/TC (80%)
chr13	11545829	11545830	113566686	+	2	JAHKSD010000345.1	0	1	45063	0	0	0	0	1	0	0	0	0	HPRC_PLUS	male	3140		EUR	PGP - Ashkenazim Jewish	HG002	HG002 2 JAHKSD010000345.1	1007	0.652	0.633	0.57	0.726	TRUE	6	SD	SD and High GA/TC (80%)
chr13	11590890	11590891	113566686	+	2	JAHKSD010000345.1	45062	45063	45063	0	0	0	0	1	0	0	0	0	HPRC_PLUS	male	3140		EUR	PGP - Ashkenazim Jewish	HG002	HG002 2 JAHKSD010000345.1	1008	0.824	0.615	0.477	0.715	TRUE	7	SD and High GA/TC (80%)	SD and High GA/TC (80%)
chr13	11727661	11727662	113566686	-	2	JAHKSD010000014.1	0	1	2673291	0	0	0	0	1	0	0	0	0	HPRC_PLUS	male	3140		EUR	PGP - Ashkenazim Jewish	HG002	HG002 2 JAHKSD010000014.1	1009	0.569	0.852	0.713	0.665	TRUE	7	SD and High GA/TC (80%)	SD and High GA/TC (80%)
chr13	15575255	15575256	113566686	+	2	JAHKSD010000105.1	4091365	4091366	4104114	100	100	100	1	0	0	0	0	0	HPRC_PLUS	male	3140		EUR	PGP - Ashkenazim Jewish	HG002	HG002 2 JAHKSD010000105.1	1010	0.492	0.533	0.398	0.625	FALSE	38	Alpha	Satellite
chr13	15639799	15639800	113566686	-	2	JAHKSD010000115.1	135071	135072	141340	0	0	0	0	1	0	0	0	0	HPRC_PLUS	male	3140		EUR	PGP - Ashkenazim Jewish	HG002	HG002 2 JAHKSD010000115.1	1011	0.491	0.533	0.398	0.624	FALSE	17	Alpha	Satellite
chr13	15785357	15785358	113566686	+	2	JAHKSD010000228.1	324891	324892	324900	0	0	0	0	1	0	0	0	0	HPRC_PLUS	male	3140		EUR	PGP - Ashkenazim Jewish	HG002	HG002 2 JAHKSD010000228.1	1012	0.491	0.534	0.398	0.623	FALSE	12	Alpha	Satellite
chr13	15827051	15827052	113566686	-	2	JAHKSD010000115.1	0	1	141340	0	0	0	0	1	0	0	0	0	HPRC_PLUS	male	3140		EUR	PGP - Ashkenazim Jewish	HG002	HG002 2 JAHKSD010000115.1	1013	0.493	0.531	0.397	0.623	FALSE	15	Alpha	Satellite
chr13	15865096	15865097	113566686	+	2	JAHKSD010000097.1	54	55	193726	0	0	0	0	1	0	0	0	0	HPRC_PLUS	male	3140		EUR	PGP - Ashkenazim Jewish	HG002	HG002 2 JAHKSD010000097.1	1014	0.493	0.531	0.399	0.623	FALSE	16	Alpha	Satellite
chr13	16014066	16014067	113566686	+	2	JAHKSD010000228.1	9097	9098	324900	0	0	0	0	1	0	0	0	0	HPRC_PLUS	male	3140		EUR	PGP - Ashkenazim Jewish	HG002	HG002 2 JAHKSD010000228.1	1015	0.491	0.532	0.399	0.622	FALSE	13	Alpha	Satellite
chr13	16019852	16019853	113566686	+	2	JAHKSD010000343.1	0	1	71340	0	0	0	0	1	0	0	0	0	HPRC_PLUS	male	3140		EUR	PGP - Ashkenazim Jewish	HG002	HG002 2 JAHKSD010000343.1	1016	0.49	0.532	0.399	0.622	FALSE	13	Alpha	Satellite
chr13	16036017	16036018	113566686	+	2	JAHKSD010000097.1	191199	191200	193726	0	0	0	0	1	0	0	0	0	HPRC_PLUS	male	3140		EUR	PGP - Ashkenazim Jewish	HG002	HG002 2 JAHKSD010000097.1	1017	0.49	0.533	0.398	0.621	FALSE	12	Alpha	Satellite
chr13	16257258	16257259	113566686	+	2	JAHKSD010000219.1	5345	5346	332506	0	0	0	0	1	0	0	0	0	HPRC_PLUS	male	3140		EUR	PGP - Ashkenazim Jewish	HG002	HG002 2 JAHKSD010000219.1	1018	0.49	0.532	0.397	0.623	FALSE	10	Alpha	Satellite
chr13	16475771	16475772	113566686	+	2	JAHKSD010000343.1	71141	71142	71340	0	0	0	0	1	0	0	0	0	HPRC_PLUS	male	3140		EUR	PGP - Ashkenazim Jewish	HG002	HG002 2 JAHKSD010000343.1	1019	0.493	0.534	0.399	0.623	FALSE	9	Alpha	Satellite
chr13	16556035	16556036	113566686	+	2	JAHKSD010000219.1	332505	332506	332506	0	0	0	0	1	0	0	0	0	HPRC_PLUS	male	3140		EUR	PGP - Ashkenazim Jewish	HG002	HG002 2 JAHKSD010000219.1	1020	0.49	0.532	0.398	0.622	FALSE	11	Alpha	Satellite
chr13	17347672	17347673	113566686	-	2	JAHKSD010000106.1	12269112	12269113	12276850	0	0	0	0	1	0	0	0	0	HPRC_PLUS	male	3140		EUR	PGP - Ashkenazim Jewish	HG002	HG002 2 JAHKSD010000106.1	1021	0.49	0.532	0.4	0.624	FALSE	1	Poisson breaks	Chromosome end or Poisson
chr13	29662584	29662585	113566686	-	2	JAHKSD010000106.1	0	1	12276850	0	0	0	0	1	0	0	0	0	HPRC_PLUS	male	3140		EUR	PGP - Ashkenazim Jewish	HG002	HG002 2 JAHKSD010000106.1	1022	0.585	0.605	0.571	0.676	FALSE	2	Poisson breaks	Chromosome end or Poisson
chr13	29712275	29712276	113566686	+	2	JAHKSD010000126.1	0	1	21797790	0	0	0	0	1	0	0	0	0	HPRC_PLUS	male	3140		EUR	PGP - Ashkenazim Jewish	HG002	HG002 2 JAHKSD010000126.1	1023	0.609	0.623	0.531	0.684	FALSE	2	Poisson breaks	Chromosome end or Poisson
chr13	51497370	51497371	113566686	+	2	JAHKSD010000126.1	21797789	21797790	21797790	0	0	0	0	1	0	0	0	0	HPRC_PLUS	male	3140		EUR	PGP - Ashkenazim Jewish	HG002	HG002 2 JAHKSD010000126.1	1024	0.604	0.641	0.562	0.716	FALSE	5	SD	SD and High GA/TC (80%)
chr13	51577278	51577279	113566686	+	2	JAHKSD010000221.1	0	1	185353	0	0	0	0	1	0	0	0	0	HPRC_PLUS	male	3140		EUR	PGP - Ashkenazim Jewish	HG002	HG002 2 JAHKSD010000221.1	1025	0.638	0.631	0.516	0.664	FALSE	4	SD	SD and High GA/TC (80%)
chr13	51752341	51752342	113566686	+	2	JAHKSD010000221.1	175173	175174	185353	0	0	0	0	1	0	0	0	0	HPRC_PLUS	male	3140		EUR	PGP - Ashkenazim Jewish	HG002	HG002 2 JAHKSD010000221.1	1026	0.639	0.603	0.536	0.731	FALSE	4	SD	SD and High GA/TC (80%)
chr13	51752369	51752370	113566686	-	2	JAHKSD010000186.1	4621539	4621540	4632782	0	0	0	0	1	0	0	0	0	HPRC_PLUS	male	3140		EUR	PGP - Ashkenazim Jewish	HG002	HG002 2 JAHKSD010000186.1	1027	0.639	0.603	0.536	0.731	FALSE	4	SD	SD and High GA/TC (80%)
chr13	56357663	56357664	113566686	-	2	JAHKSD010000065.1	57225566	57225567	57225567	0	0	0	0	1	0	0	0	0	HPRC_PLUS	male	3140		EUR	PGP - Ashkenazim Jewish	HG002	HG002 2 JAHKSD010000065.1	1028	0.63	0.636	0.596	0.738	FALSE	179	SD	SD and High GA/TC (80%)
chr13	56375891	56375892	113566686	-	2	JAHKSD010000186.1	0	1	4632782	0	0	0	0	1	0	0	0	0	HPRC_PLUS	male	3140		EUR	PGP - Ashkenazim Jewish	HG002	HG002 2 JAHKSD010000186.1	1029	0.61	0.638	0.599	0.608	FALSE	179	SD	SD and High GA/TC (80%)
chr13	113566685	113566686	113566686	-	2	JAHKSD010000065.1	6319	6320	57225567	0	0	0	0	1	0	0	0	0	HPRC_PLUS	male	3140		EUR	PGP - Ashkenazim Jewish	HG002	HG002 2 JAHKSD010000065.1	1030	0.682	0.567	0.751	0.67	FALSE	93	Chromosome end	Chromosome end or Poisson
chr14	4606	4607	101161492	+	2	JAHKSD010000028.1	4055	4056	3574531	0	0	0	0	1	0	0	0	0	HPRC_PLUS	male	3140		EUR	PGP - Ashkenazim Jewish	HG002	HG002 2 JAHKSD010000028.1	1031	0.553	0.67	0.58	0.612	TRUE	25	Chromosome end	Chromosome end or Poisson
chr14	1814031	1814032	101161492	+	2	JAHKSD010000332.1	0	1	195303	0	0	0	0	1	0	0	0	0	HPRC_PLUS	male	3140		EUR	PGP - Ashkenazim Jewish	HG002	HG002 2 JAHKSD010000332.1	1032	0.566	0.634	0.554	0.732	TRUE	11	SD	SD and High GA/TC (80%)
chr14	2009046	2009047	101161492	+	2	JAHKSD010000332.1	195302	195303	195303	0	0	0	0	1	0	0	0	0	HPRC_PLUS	male	3140		EUR	PGP - Ashkenazim Jewish	HG002	HG002 2 JAHKSD010000332.1	1033	0.587	0.634	0.595	0.712	TRUE	62	SD	SD and High GA/TC (80%)
chr14	2080449	2080450	101161492	+	2	JAHKSD010000417.1	0	1	77324	0	0	0	0	1	0	0	0	0	HPRC_PLUS	male	3140		EUR	PGP - Ashkenazim Jewish	HG002	HG002 2 JAHKSD010000417.1	1034	0.641	0.74	0.528	0.729	TRUE	144	SD	SD and High GA/TC (80%)
chr14	2153422	2153423	101161492	+	2	JAHKSD010000417.1	77323	77324	77324	0	0	0	0	1	0	0	0	0	HPRC_PLUS	male	3140		EUR	PGP - Ashkenazim Jewish	HG002	HG002 2 JAHKSD010000417.1	1035	0.595	0.807	0.843	0.587	TRUE	187	SD and High GA/TC (80%)	SD and High GA/TC (80%)
chr14	2557793	2557794	101161492	-	2	JAHKSD010000125.1	1726594	1726595	1726595	0	0	0	0	1	0	0	0	0	HPRC_PLUS	male	3140		EUR	PGP - Ashkenazim Jewish	HG002	HG002 2 JAHKSD010000125.1	1036	0.556	0.878	0.844	0.544	TRUE	171	SD and High GA/TC (80%)	SD and High GA/TC (80%)
chr14	2657895	2657896	101161492	-	2	JAHKSD010000408.1	37420	37421	37421	0	0	0	0	1	0	0	0	0	HPRC_PLUS	male	3140		EUR	PGP - Ashkenazim Jewish	HG002	HG002 2 JAHKSD010000408.1	1037	0.534	0.881	0.786	0.618	TRUE	668	SD and High GA/TC (80%)	SD and High GA/TC (80%)
chr14	2693855	2693856	101161492	-	2	JAHKSD010000408.1	1472	1473	37421	0	0	0	0	1	0	0	0	0	HPRC_PLUS	male	3140		EUR	PGP - Ashkenazim Jewish	HG002	HG002 2 JAHKSD010000408.1	1038	0.558	0.882	0.837	0.54	TRUE	819	SD and High GA/TC (80%)	SD and High GA/TC (80%)
chr14	2708013	2708014	101161492	+	2	JAHKSD010000355.1	0	1	88244	0	0	0	0	1	0	0	0	0	HPRC_PLUS	male	3140		EUR	PGP - Ashkenazim Jewish	HG002	HG002 2 JAHKSD010000355.1	1039	0.537	0.883	0.605	0.634	TRUE	828	SD and High GA/TC (80%)	SD and High GA/TC (80%)
chr14	2732995	2732996	101161492	-	2	JAHKSD010000003.1	32897	32898	32898	0	0	0	0	1	0	0	0	0	HPRC_PLUS	male	3140		EUR	PGP - Ashkenazim Jewish	HG002	HG002 2 JAHKSD010000003.1	1040	0.557	0.743	0.843	0.536	TRUE	811	SD	SD and High GA/TC (80%)
chr14	2737250	2737251	101161492	-	2	JAHKSD010000350.1	44138	44139	44139	0	0	0	0	1	0	0	0	0	HPRC_PLUS	male	3140		EUR	PGP - Ashkenazim Jewish	HG002	HG002 2 JAHKSD010000350.1	1041	0.557	0.882	0.839	0.542	TRUE	811	SD and High GA/TC (80%)	SD and High GA/TC (80%)
chr14	2740418	2740419	101161492	-	2	JAHKSD010000202.1	42343	42344	42344	0	0	0	0	1	0	0	0	0	HPRC_PLUS	male	3140		EUR	PGP - Ashkenazim Jewish	HG002	HG002 2 JAHKSD010000202.1	1042	0.557	0.883	0.839	0.542	TRUE	810	SD and High GA/TC (80%)	SD and High GA/TC (80%)
chr14	2748374	2748375	101161492	+	2	JAHKSD010000414.1	0	1	42838	0	0	0	0	1	0	0	0	0	HPRC_PLUS	male	3140		EUR	PGP - Ashkenazim Jewish	HG002	HG002 2 JAHKSD010000414.1	1043	0.537	0.883	0.609	0.629	TRUE	798	SD and High GA/TC (80%)	SD and High GA/TC (80%)
chr14	2766566	2766567	101161492	-	2	JAHKSD010000003.1	0	1	32898	0	0	0	0	1	0	0	0	0	HPRC_PLUS	male	3140		EUR	PGP - Ashkenazim Jewish	HG002	HG002 2 JAHKSD010000003.1	1044	0.59	0.81	0.842	0.629	TRUE	759	SD and High GA/TC (80%)	SD and High GA/TC (80%)
chr14	2781417	2781418	101161492	-	2	JAHKSD010000350.1	0	1	44139	0	0	0	0	1	0	0	0	0	HPRC_PLUS	male	3140		EUR	PGP - Ashkenazim Jewish	HG002	HG002 2 JAHKSD010000350.1	1045	0.559	0.881	0.838	0.539	TRUE	742	SD and High GA/TC (80%)	SD and High GA/TC (80%)
chr14	2782767	2782768	101161492	-	2	JAHKSD010000202.1	0	1	42344	0	0	0	0	1	0	0	0	0	HPRC_PLUS	male	3140		EUR	PGP - Ashkenazim Jewish	HG002	HG002 2 JAHKSD010000202.1	1046	0.559	0.881	0.838	0.539	TRUE	740	SD and High GA/TC (80%)	SD and High GA/TC (80%)
chr14	2790354	2790355	101161492	+	2	JAHKSD010000414.1	42837	42838	42838	0	0	0	0	1	0	0	0	0	HPRC_PLUS	male	3140		EUR	PGP - Ashkenazim Jewish	HG002	HG002 2 JAHKSD010000414.1	1047	0.533	0.882	0.786	0.6	TRUE	733	SD and High GA/TC (80%)	SD and High GA/TC (80%)
chr14	2796462	2796463	101161492	+	2	JAHKSD010000355.1	88243	88244	88244	0	0	0	0	1	0	0	0	0	HPRC_PLUS	male	3140		EUR	PGP - Ashkenazim Jewish	HG002	HG002 2 JAHKSD010000355.1	1048	0.533	0.882	0.602	0.633	TRUE	699	SD and High GA/TC (80%)	SD and High GA/TC (80%)
chr14	5881853	5881854	101161492	+	2	JAHKSD010000320.1	354486	354487	354487	0	0	0	0	1	0	0	0	0	HPRC_PLUS	male	3140		EUR	PGP - Ashkenazim Jewish	HG002	HG002 2 JAHKSD010000320.1	1049	0.756	0.57	0.568	0.692	TRUE	12	SD	SD and High GA/TC (80%)
chr14	6076048	6076049	101161492	+	2	JAHKSD010000333.1	0	1	63923	0	0	0	0	1	0	0	0	0	HPRC_PLUS	male	3140		EUR	PGP - Ashkenazim Jewish	HG002	HG002 2 JAHKSD010000333.1	1050	0.314	0.761	0.457	0.618	TRUE	4	SD	SD and High GA/TC (80%)
chr14	6139980	6139981	101161492	+	2	JAHKSD010000333.1	63922	63923	63923	0	0	0	0	1	0	0	0	0	HPRC_PLUS	male	3140		EUR	PGP - Ashkenazim Jewish	HG002	HG002 2 JAHKSD010000333.1	1051	0.612	0.52	0.53	0.649	TRUE	3	SD	SD and High GA/TC (80%)
chr14	6390884	6390885	101161492	+	2	JAHKSD010000320.1	0	1	354487	0	0	0	0	1	0	0	0	0	HPRC_PLUS	male	3140		EUR	PGP - Ashkenazim Jewish	HG002	HG002 2 JAHKSD010000320.1	1052	0.632	0.765	0.515	0.665	TRUE	1	Poisson breaks	Chromosome end or Poisson
chr14	7482367	7482368	101161492	+	2	JAHKSD010000406.1	0	1	40320	0	0	0	0	1	0	0	0	0	HPRC_PLUS	male	3140		EUR	PGP - Ashkenazim Jewish	HG002	HG002 2 JAHKSD010000406.1	1053	0.53	0.502	0.392	0.636	TRUE	29	SD	SD and High GA/TC (80%)
chr14	7520827	7520828	101161492	+	2	JAHKSD010000406.1	40319	40320	40320	0	0	0	0	1	0	0	0	0	HPRC_PLUS	male	3140		EUR	PGP - Ashkenazim Jewish	HG002	HG002 2 JAHKSD010000406.1	1054	0.552	0.509	0.529	0.646	TRUE	30	SD	SD and High GA/TC (80%)
chr14	10360362	10360363	101161492	-	2	JAHKSD010000051.1	1731	1732	10660509	100	100	100	1	0	0	0	0	0	HPRC_PLUS	male	3140		EUR	PGP - Ashkenazim Jewish	HG002	HG002 2 JAHKSD010000051.1	1055	0.502	0.526	0.4	0.629	FALSE	20	Alpha	Satellite
chr14	10368950	10368951	101161492	-	2	JAHKSD010000376.1	77466	77467	77467	0	0	0	0	1	0	0	0	0	HPRC_PLUS	male	3140		EUR	PGP - Ashkenazim Jewish	HG002	HG002 2 JAHKSD010000376.1	1056	0.497	0.526	0.401	0.629	FALSE	22	Alpha	Satellite
chr14	10395029	10395030	101161492	+	2	JAHKSD010000127.1	0	1	82464	0	0	0	0	1	0	0	0	0	HPRC_PLUS	male	3140		EUR	PGP - Ashkenazim Jewish	HG002	HG002 2 JAHKSD010000127.1	1057	0.492	0.528	0.402	0.62	FALSE	31	Alpha	Satellite
chr14	10412737	10412738	101161492	-	2	JAHKSD010000239.1	64183	64184	64187	0	0	0	0	1	0	0	0	0	HPRC_PLUS	male	3140		EUR	PGP - Ashkenazim Jewish	HG002	HG002 2 JAHKSD010000239.1	1058	0.494	0.526	0.402	0.619	FALSE	33	Alpha	Satellite
chr14	10447186	10447187	101161492	-	2	JAHKSD010000376.1	1638	1639	77467	0	0	0	0	1	0	0	0	0	HPRC_PLUS	male	3140		EUR	PGP - Ashkenazim Jewish	HG002	HG002 2 JAHKSD010000376.1	1059	0.492	0.526	0.404	0.621	FALSE	35	Alpha	Satellite
chr14	10464144	10464145	101161492	+	2	JAHKSD010000336.1	300528	300529	304700	0	0	0	0	1	0	0	0	0	HPRC_PLUS	male	3140		EUR	PGP - Ashkenazim Jewish	HG002	HG002 2 JAHKSD010000336.1	1060	0.493	0.526	0.402	0.621	FALSE	34	Alpha	Satellite
chr14	10477334	10477335	101161492	-	2	JAHKSD010000239.1	0	1	64187	0	0	0	0	1	0	0	0	0	HPRC_PLUS	male	3140		EUR	PGP - Ashkenazim Jewish	HG002	HG002 2 JAHKSD010000239.1	1061	0.493	0.526	0.402	0.62	FALSE	32	Alpha	Satellite
chr14	10477495	10477496	101161492	+	2	JAHKSD010000127.1	82462	82463	82464	0	0	0	0	1	0	0	0	0	HPRC_PLUS	male	3140		EUR	PGP - Ashkenazim Jewish	HG002	HG002 2 JAHKSD010000127.1	1062	0.493	0.526	0.402	0.62	FALSE	32	Alpha	Satellite
chr14	10497654	10497655	101161492	+	2	JAHKSD010000272.1	226910	226911	227201	0	0	0	0	1	0	0	0	0	HPRC_PLUS	male	3140		EUR	PGP - Ashkenazim Jewish	HG002	HG002 2 JAHKSD010000272.1	1063	0.496	0.525	0.403	0.618	FALSE	31	Alpha	Satellite
chr14	10623221	10623222	101161492	+	2	JAHKSD010000272.1	0	1	227201	0	0	0	0	1	0	0	0	0	HPRC_PLUS	male	3140		EUR	PGP - Ashkenazim Jewish	HG002	HG002 2 JAHKSD010000272.1	1064	0.495	0.526	0.401	0.619	FALSE	29	Alpha	Satellite
chr14	12003821	12003822	101161492	+	2	JAHKSD010000136.1	2720	2721	2319174	0	0	0	0	1	0	0	0	0	HPRC_PLUS	male	3140		EUR	PGP - Ashkenazim Jewish	HG002	HG002 2 JAHKSD010000136.1	1065	0.491	0.526	0.4	0.619	FALSE	31	Alpha	Satellite
chr14	12365309	12365310	101161492	+	2	JAHKSD010000336.1	1910	1911	304700	0	0	0	0	1	0	0	0	0	HPRC_PLUS	male	3140		EUR	PGP - Ashkenazim Jewish	HG002	HG002 2 JAHKSD010000336.1	1066	0.493	0.524	0.4	0.619	FALSE	28	Alpha	Satellite
chr14	13244277	13244278	101161492	-	2	JAHKSD010000347.1	103012	103013	103013	0	0	0	0	1	0	0	0	0	HPRC_PLUS	male	3140		EUR	PGP - Ashkenazim Jewish	HG002	HG002 2 JAHKSD010000347.1	1067	0.604	0.61	0.609	0.722	FALSE	9	SD	SD and High GA/TC (80%)
chr14	13344384	13344385	101161492	-	2	JAHKSD010000347.1	0	1	103013	0	0	0	0	1	0	0	0	0	HPRC_PLUS	male	3140		EUR	PGP - Ashkenazim Jewish	HG002	HG002 2 JAHKSD010000347.1	1068	0.55	0.653	0.669	0.713	FALSE	6	SD	SD and High GA/TC (80%)
chr14	13702290	13702291	101161492	+	2	JAHKSD010000044.1	12459	12460	86491595	0	0	0	0	1	0	0	0	0	HPRC_PLUS	male	3140		EUR	PGP - Ashkenazim Jewish	HG002	HG002 2 JAHKSD010000044.1	1069	0.643	0.58	0.579	0.705	FALSE	9	SD	SD and High GA/TC (80%)
chr14	13717718	13717719	101161492	+	2	JAHKSD010000199.1	0	1	733210	0	0	0	0	1	0	0	0	0	HPRC_PLUS	male	3140		EUR	PGP - Ashkenazim Jewish	HG002	HG002 2 JAHKSD010000199.1	1070	0.628	0.561	0.592	0.708	FALSE	8	SD	SD and High GA/TC (80%)
chr14	13735932	13735933	101161492	+	2	JAHKSD010000136.1	2319173	2319174	2319174	0	0	0	0	1	0	0	0	0	HPRC_PLUS	male	3140		EUR	PGP - Ashkenazim Jewish	HG002	HG002 2 JAHKSD010000136.1	1071	0.569	0.571	0.62	0.701	FALSE	15	SD	SD and High GA/TC (80%)
chr14	13736246	13736247	101161492	+	2	JAHKSD010000199.1	733209	733210	733210	0	0	0	0	1	0	0	0	0	HPRC_PLUS	male	3140		EUR	PGP - Ashkenazim Jewish	HG002	HG002 2 JAHKSD010000199.1	1072	0.569	0.571	0.62	0.701	FALSE	15	SD	SD and High GA/TC (80%)
chr14	13776156	13776157	101161492	+	2	JAHKSD010000146.1	0	1	46712	0	0	0	0	1	0	0	0	0	HPRC_PLUS	male	3140		EUR	PGP - Ashkenazim Jewish	HG002	HG002 2 JAHKSD010000146.1	1073	0.603	0.602	0.487	0.717	FALSE	18	SD	SD and High GA/TC (80%)
chr14	13822883	13822884	101161492	+	2	JAHKSD010000146.1	46711	46712	46712	0	0	0	0	1	0	0	0	0	HPRC_PLUS	male	3140		EUR	PGP - Ashkenazim Jewish	HG002	HG002 2 JAHKSD010000146.1	1074	0.595	0.653	0.598	0.688	FALSE	17	SD	SD and High GA/TC (80%)
chr14	54281389	54281390	101161492	-	2	JAHKSD010000246.1	37656	37657	54472	0	0	0	0	1	0	0	0	0	HPRC_PLUS	male	3140		EUR	PGP - Ashkenazim Jewish	HG002	HG002 2 JAHKSD010000246.1	1075	0.633	0.601	0.559	0.758	FALSE	2	Poisson breaks	Chromosome end or Poisson
chr14	54319044	54319045	101161492	-	2	JAHKSD010000246.1	0	1	54472	0	0	0	0	1	0	0	0	0	HPRC_PLUS	male	3140		EUR	PGP - Ashkenazim Jewish	HG002	HG002 2 JAHKSD010000246.1	1076	0.557	0.646	0.465	0.717	FALSE	2	Poisson breaks	Chromosome end or Poisson
chr14	100225737	100225738	101161492	-	2	JAHKSD010000060.1	915439	915440	915440	0	0	0	0	1	0	0	0	0	HPRC_PLUS	male	3140		EUR	PGP - Ashkenazim Jewish	HG002	HG002 2 JAHKSD010000060.1	1077	0.619	0.624	0.569	0.646	FALSE	129	SD	SD and High GA/TC (80%)
chr14	100243920	100243921	101161492	+	2	JAHKSD010000044.1	86491594	86491595	86491595	100	100	100	1	0	0	0	0	0	HPRC_PLUS	male	3140		EUR	PGP - Ashkenazim Jewish	HG002	HG002 2 JAHKSD010000044.1	1078	0.569	0.607	0.581	0.633	FALSE	98	SD	SD and High GA/TC (80%)
chr14	100332154	100332155	101161492	-	2	JAHKSD010000252.1	33793	33794	33794	0	0	0	0	1	0	0	0	0	HPRC_PLUS	male	3140		EUR	PGP - Ashkenazim Jewish	HG002	HG002 2 JAHKSD010000252.1	1079	0.608	0.589	0.521	0.694	FALSE	81	other	other
chr14	100365956	100365957	101161492	-	2	JAHKSD010000252.1	0	1	33794	0	0	0	0	1	0	0	0	0	HPRC_PLUS	male	3140		EUR	PGP - Ashkenazim Jewish	HG002	HG002 2 JAHKSD010000252.1	1080	0.617	0.589	0.523	0.709	FALSE	83	other	other
chr14	101161429	101161430	101161492	-	2	JAHKSD010000060.1	5505	5506	915440	0	0	0	0	1	0	0	0	0	HPRC_PLUS	male	3140		EUR	PGP - Ashkenazim Jewish	HG002	HG002 2 JAHKSD010000060.1	1081	0.684783	0.645	0.828	0.694	FALSE	107	Chromosome end	Chromosome end or Poisson
chr15	23212	23213	99753195	-	2	JAHKSD010000051.1	10660508	10660509	10660509	100	100	100	1	0	0	0	0	0	HPRC_PLUS	male	3140		EUR	PGP - Ashkenazim Jewish	HG002	HG002 2 JAHKSD010000051.1	1082	0.596	0.596	0.496	0.702	TRUE	134	Chromosome end	Chromosome end or Poisson
chr15	2496990	2496991	99753195	-	2	JAHKSD010000099.1	0	1	2033061	0	0	0	0	1	0	0	0	0	HPRC_PLUS	male	3140		EUR	PGP - Ashkenazim Jewish	HG002	HG002 2 JAHKSD010000099.1	1083	0.638	0.795	0.594	0.732	TRUE	109	SD	SD and High GA/TC (80%)
chr15	2546512	2546513	99753195	+	2	JAHKSD010000165.1	3601429	3601430	3601430	0	0	0	0	1	0	0	0	0	HPRC_PLUS	male	3140		EUR	PGP - Ashkenazim Jewish	HG002	HG002 2 JAHKSD010000165.1	1084	0.586	0.877	0.842	0.627	TRUE	113	SD and High GA/TC (80%)	SD and High GA/TC (80%)
chr15	3747872	3747873	99753195	+	2	JAHKSD010000226.1	0	1	35917	0	0	0	0	1	0	0	0	0	HPRC_PLUS	male	3140		EUR	PGP - Ashkenazim Jewish	HG002	HG002 2 JAHKSD010000226.1	1085	0.59	0.883	0.605	0.631	TRUE	68	SD and High GA/TC (80%)	SD and High GA/TC (80%)
chr15	3783038	3783039	99753195	+	2	JAHKSD010000226.1	35916	35917	35917	0	0	0	0	1	0	0	0	0	HPRC_PLUS	male	3140		EUR	PGP - Ashkenazim Jewish	HG002	HG002 2 JAHKSD010000226.1	1086	0.537	0.882	0.784	0.569	TRUE	73	SD and High GA/TC (80%)	SD and High GA/TC (80%)
chr15	3963730	3963731	99753195	-	2	JAHKSD010000277.1	132413	132414	132414	0	0	0	0	1	0	0	0	0	HPRC_PLUS	male	3140		EUR	PGP - Ashkenazim Jewish	HG002	HG002 2 JAHKSD010000277.1	1087	0.538	0.882	0.604	0.631	TRUE	597	SD and High GA/TC (80%)	SD and High GA/TC (80%)
chr15	4010770	4010771	99753195	+	2	JAHKSD010000120.1	0	1	123972	0	0	0	0	1	0	0	0	0	HPRC_PLUS	male	3140		EUR	PGP - Ashkenazim Jewish	HG002	HG002 2 JAHKSD010000120.1	1088	0.537	0.882	0.607	0.633	TRUE	879	SD and High GA/TC (80%)	SD and High GA/TC (80%)
chr15	4040169	4040170	99753195	+	2	JAHKSD010000215.1	0	1	44820	0	0	0	0	1	0	0	0	0	HPRC_PLUS	male	3140		EUR	PGP - Ashkenazim Jewish	HG002	HG002 2 JAHKSD010000215.1	1089	0.554	0.884	0.836	0.544	TRUE	1032	SD and High GA/TC (80%)	SD and High GA/TC (80%)
chr15	4085089	4085090	99753195	+	2	JAHKSD010000215.1	44819	44820	44820	0	0	0	0	1	0	0	0	0	HPRC_PLUS	male	3140		EUR	PGP - Ashkenazim Jewish	HG002	HG002 2 JAHKSD010000215.1	1090	0.556	0.881	0.837	0.538	TRUE	1194	SD and High GA/TC (80%)	SD and High GA/TC (80%)
chr15	4087690	4087691	99753195	-	2	JAHKSD010000397.1	68075	68076	68084	0	0	0	0	1	0	0	0	0	HPRC_PLUS	male	3140		EUR	PGP - Ashkenazim Jewish	HG002	HG002 2 JAHKSD010000397.1	1091	0.556	0.881	0.837	0.538	TRUE	1215	SD and High GA/TC (80%)	SD and High GA/TC (80%)
chr15	4097149	4097150	99753195	+	2	JAHKSD010000191.1	0	1	47267	0	0	0	0	1	0	0	0	0	HPRC_PLUS	male	3140		EUR	PGP - Ashkenazim Jewish	HG002	HG002 2 JAHKSD010000191.1	1092	0.537	0.882	0.606	0.631	TRUE	1263	SD and High GA/TC (80%)	SD and High GA/TC (80%)
chr15	4097579	4097580	99753195	+	2	JAHKSD010000170.1	0	1	55651	0	0	0	0	1	0	0	0	0	HPRC_PLUS	male	3140		EUR	PGP - Ashkenazim Jewish	HG002	HG002 2 JAHKSD010000170.1	1093	0.537	0.882	0.606	0.631	TRUE	1258	SD and High GA/TC (80%)	SD and High GA/TC (80%)
chr15	4098516	4098517	99753195	-	2	JAHKSD010000277.1	0	1	132414	0	0	0	0	1	0	0	0	0	HPRC_PLUS	male	3140		EUR	PGP - Ashkenazim Jewish	HG002	HG002 2 JAHKSD010000277.1	1094	0.537	0.882	0.606	0.631	TRUE	1258	SD and High GA/TC (80%)	SD and High GA/TC (80%)
chr15	4103788	4103789	99753195	+	2	JAHKSD010000167.1	0	1	74163	0	0	0	0	1	0	0	0	0	HPRC_PLUS	male	3140		EUR	PGP - Ashkenazim Jewish	HG002	HG002 2 JAHKSD010000167.1	1095	0.591	0.882	0.601	0.631	TRUE	1269	SD and High GA/TC (80%)	SD and High GA/TC (80%)
chr15	4114285	4114286	99753195	-	2	JAHKSD010000405.1	42460	42461	42461	0	0	0	0	1	0	0	0	0	HPRC_PLUS	male	3140		EUR	PGP - Ashkenazim Jewish	HG002	HG002 2 JAHKSD010000405.1	1096	0.591	0.815	0.842	0.631	TRUE	1275	SD and High GA/TC (80%)	SD and High GA/TC (80%)
chr15	4133206	4133207	99753195	+	2	JAHKSD010000120.1	123971	123972	123972	0	0	0	0	1	0	0	0	0	HPRC_PLUS	male	3140		EUR	PGP - Ashkenazim Jewish	HG002	HG002 2 JAHKSD010000120.1	1097	0.556	0.883	0.837	0.543	TRUE	1319	SD and High GA/TC (80%)	SD and High GA/TC (80%)
chr15	4144407	4144408	99753195	+	2	JAHKSD010000191.1	47266	47267	47267	0	0	0	0	1	0	0	0	0	HPRC_PLUS	male	3140		EUR	PGP - Ashkenazim Jewish	HG002	HG002 2 JAHKSD010000191.1	1098	0.535	0.883	0.604	0.634	TRUE	1357	SD and High GA/TC (80%)	SD and High GA/TC (80%)
chr15	4144606	4144607	99753195	+	2	JAHKSD010000296.1	0	1	44783	0	0	0	0	1	0	0	0	0	HPRC_PLUS	male	3140		EUR	PGP - Ashkenazim Jewish	HG002	HG002 2 JAHKSD010000296.1	1099	0.535	0.883	0.604	0.634	TRUE	1357	SD and High GA/TC (80%)	SD and High GA/TC (80%)
chr15	4148455	4148456	99753195	-	2	JAHKSD010000107.1	89771	89772	89772	0	0	0	0	1	0	0	0	0	HPRC_PLUS	male	3140		EUR	PGP - Ashkenazim Jewish	HG002	HG002 2 JAHKSD010000107.1	1100	0.597	0.883	0.604	0.634	TRUE	1364	SD and High GA/TC (80%)	SD and High GA/TC (80%)
chr15	4152502	4152503	99753195	+	2	JAHKSD010000170.1	55650	55651	55651	0	0	0	0	1	0	0	0	0	HPRC_PLUS	male	3140		EUR	PGP - Ashkenazim Jewish	HG002	HG002 2 JAHKSD010000170.1	1101	0.597	0.883	0.788	0.634	TRUE	1370	SD and High GA/TC (80%)	SD and High GA/TC (80%)
chr15	4154185	4154186	99753195	-	2	JAHKSD010000397.1	0	1	68084	0	0	0	0	1	0	0	0	0	HPRC_PLUS	male	3140		EUR	PGP - Ashkenazim Jewish	HG002	HG002 2 JAHKSD010000397.1	1102	0.597	0.883	0.843	0.634	TRUE	1366	SD and High GA/TC (80%)	SD and High GA/TC (80%)
chr15	4156359	4156360	99753195	+	2	JAHKSD010000189.1	0	1	31650	0	0	0	0	1	0	0	0	0	HPRC_PLUS	male	3140		EUR	PGP - Ashkenazim Jewish	HG002	HG002 2 JAHKSD010000189.1	1103	0.597	0.847	0.843	0.634	TRUE	1374	SD and High GA/TC (80%)	SD and High GA/TC (80%)
chr15	4157716	4157717	99753195	-	2	JAHKSD010000405.1	0	1	42461	0	0	0	0	1	0	0	0	0	HPRC_PLUS	male	3140		EUR	PGP - Ashkenazim Jewish	HG002	HG002 2 JAHKSD010000405.1	1104	0.597	0.847	0.843	0.634	TRUE	1365	SD and High GA/TC (80%)	SD and High GA/TC (80%)
chr15	4171957	4171958	99753195	-	2	JAHKSD010000158.1	31382	31383	31383	0	0	0	0	1	0	0	0	0	HPRC_PLUS	male	3140		EUR	PGP - Ashkenazim Jewish	HG002	HG002 2 JAHKSD010000158.1	1105	0.553	0.779	0.843	0.529	TRUE	1360	SD	SD and High GA/TC (80%)
chr15	4178679	4178680	99753195	+	2	JAHKSD010000167.1	74162	74163	74163	0	0	0	0	1	0	0	0	0	HPRC_PLUS	male	3140		EUR	PGP - Ashkenazim Jewish	HG002	HG002 2 JAHKSD010000167.1	1106	0.553	0.884	0.835	0.544	TRUE	1361	SD and High GA/TC (80%)	SD and High GA/TC (80%)
chr15	4184246	4184247	99753195	+	2	JAHKSD010000208.1	0	1	88231	0	0	0	0	1	0	0	0	0	HPRC_PLUS	male	3140		EUR	PGP - Ashkenazim Jewish	HG002	HG002 2 JAHKSD010000208.1	1107	0.536	0.884	0.782	0.544	TRUE	1377	SD and High GA/TC (80%)	SD and High GA/TC (80%)
chr15	4186401	4186402	99753195	+	2	JAHKSD010000189.1	31649	31650	31650	0	0	0	0	1	0	0	0	0	HPRC_PLUS	male	3140		EUR	PGP - Ashkenazim Jewish	HG002	HG002 2 JAHKSD010000189.1	1108	0.536	0.884	0.609	0.63	TRUE	1384	SD and High GA/TC (80%)	SD and High GA/TC (80%)
chr15	4189428	4189429	99753195	+	2	JAHKSD010000296.1	44782	44783	44783	0	0	0	0	1	0	0	0	0	HPRC_PLUS	male	3140		EUR	PGP - Ashkenazim Jewish	HG002	HG002 2 JAHKSD010000296.1	1109	0.536	0.884	0.609	0.63	TRUE	1381	SD and High GA/TC (80%)	SD and High GA/TC (80%)
chr15	4196483	4196484	99753195	-	2	JAHKSD010000270.1	46658	46659	46662	0	0	0	0	1	0	0	0	0	HPRC_PLUS	male	3140		EUR	PGP - Ashkenazim Jewish	HG002	HG002 2 JAHKSD010000270.1	1110	0.591	0.881	0.775	0.63	TRUE	1388	SD and High GA/TC (80%)	SD and High GA/TC (80%)
chr15	4204350	4204351	99753195	-	2	JAHKSD010000158.1	0	1	31383	0	0	0	0	1	0	0	0	0	HPRC_PLUS	male	3140		EUR	PGP - Ashkenazim Jewish	HG002	HG002 2 JAHKSD010000158.1	1111	0.591	0.81	0.842	0.63	TRUE	1371	SD and High GA/TC (80%)	SD and High GA/TC (80%)
chr15	4238312	4238313	99753195	-	2	JAHKSD010000107.1	0	1	89772	0	0	0	0	1	0	0	0	0	HPRC_PLUS	male	3140		EUR	PGP - Ashkenazim Jewish	HG002	HG002 2 JAHKSD010000107.1	1112	0.588	0.883	0.608	0.632	TRUE	1396	SD and High GA/TC (80%)	SD and High GA/TC (80%)
chr15	4241622	4241623	99753195	-	2	JAHKSD010000270.1	0	1	46662	0	0	0	0	1	0	0	0	0	HPRC_PLUS	male	3140		EUR	PGP - Ashkenazim Jewish	HG002	HG002 2 JAHKSD010000270.1	1113	0.588	0.883	0.776	0.632	TRUE	1398	SD and High GA/TC (80%)	SD and High GA/TC (80%)
chr15	4271934	4271935	99753195	+	2	JAHKSD010000208.1	88230	88231	88231	0	0	0	0	1	0	0	0	0	HPRC_PLUS	male	3140		EUR	PGP - Ashkenazim Jewish	HG002	HG002 2 JAHKSD010000208.1	1114	0.538	0.882	0.794	0.538	TRUE	1379	SD and High GA/TC (80%)	SD and High GA/TC (80%)
chr15	4311997	4311998	99753195	+	2	JAHKSD010000038.1	0	1	243396	0	0	0	0	1	0	0	0	0	HPRC_PLUS	male	3140		EUR	PGP - Ashkenazim Jewish	HG002	HG002 2 JAHKSD010000038.1	1115	0.557	0.883	0.836	0.541	TRUE	1358	SD and High GA/TC (80%)	SD and High GA/TC (80%)
chr15	4312995	4312996	99753195	+	2	JAHKSD010000269.1	0	1	63299	0	0	0	0	1	0	0	0	0	HPRC_PLUS	male	3140		EUR	PGP - Ashkenazim Jewish	HG002	HG002 2 JAHKSD010000269.1	1116	0.557	0.883	0.836	0.542	TRUE	1358	SD and High GA/TC (80%)	SD and High GA/TC (80%)
chr15	4336155	4336156	99753195	-	2	JAHKSD010000218.1	182824	182825	182825	0	0	0	0	1	0	0	0	0	HPRC_PLUS	male	3140		EUR	PGP - Ashkenazim Jewish	HG002	HG002 2 JAHKSD010000218.1	1117	0.595	0.847	0.841	0.634	TRUE	1350	SD and High GA/TC (80%)	SD and High GA/TC (80%)
chr15	4347979	4347980	99753195	-	2	JAHKSD010000093.1	64446	64447	64447	0	0	0	0	1	0	0	0	0	HPRC_PLUS	male	3140		EUR	PGP - Ashkenazim Jewish	HG002	HG002 2 JAHKSD010000093.1	1118	0.556	0.81	0.841	0.586	TRUE	1310	SD and High GA/TC (80%)	SD and High GA/TC (80%)
chr15	4354306	4354307	99753195	-	2	JAHKSD010000304.1	89003	89004	89004	0	0	0	0	1	0	0	0	0	HPRC_PLUS	male	3140		EUR	PGP - Ashkenazim Jewish	HG002	HG002 2 JAHKSD010000304.1	1119	0.556	0.884	0.837	0.543	TRUE	1314	SD and High GA/TC (80%)	SD and High GA/TC (80%)
chr15	4376507	4376508	99753195	-	2	JAHKSD010000007.1	93426	93427	93427	0	0	0	0	1	0	0	0	0	HPRC_PLUS	male	3140		EUR	PGP - Ashkenazim Jewish	HG002	HG002 2 JAHKSD010000007.1	1120	0.586	0.882	0.776	0.627	TRUE	1365	SD and High GA/TC (80%)	SD and High GA/TC (80%)
chr15	4376528	4376529	99753195	+	2	JAHKSD010000269.1	63298	63299	63299	0	0	0	0	1	0	0	0	0	HPRC_PLUS	male	3140		EUR	PGP - Ashkenazim Jewish	HG002	HG002 2 JAHKSD010000269.1	1121	0.586	0.882	0.776	0.627	TRUE	1364	SD and High GA/TC (80%)	SD and High GA/TC (80%)
chr15	4399142	4399143	99753195	-	2	JAHKSD010000190.1	28527	28528	28882	0	0	0	0	1	0	0	0	0	HPRC_PLUS	male	3140		EUR	PGP - Ashkenazim Jewish	HG002	HG002 2 JAHKSD010000190.1	1122	0.556	0.881	0.838	0.538	TRUE	1316	SD and High GA/TC (80%)	SD and High GA/TC (80%)
chr15	4403253	4403254	99753195	-	2	JAHKSD010000025.1	118901	118902	118902	0	0	0	0	1	0	0	0	0	HPRC_PLUS	male	3140		EUR	PGP - Ashkenazim Jewish	HG002	HG002 2 JAHKSD010000025.1	1123	0.556	0.882	0.838	0.538	TRUE	1322	SD and High GA/TC (80%)	SD and High GA/TC (80%)
chr15	4409339	4409340	99753195	-	2	JAHKSD010000093.1	0	1	64447	0	0	0	0	1	0	0	0	0	HPRC_PLUS	male	3140		EUR	PGP - Ashkenazim Jewish	HG002	HG002 2 JAHKSD010000093.1	1124	0.536	0.882	0.772	0.617	TRUE	1340	SD and High GA/TC (80%)	SD and High GA/TC (80%)
chr15	4427640	4427641	99753195	-	2	JAHKSD010000190.1	0	1	28882	0	0	0	0	1	0	0	0	0	HPRC_PLUS	male	3140		EUR	PGP - Ashkenazim Jewish	HG002	HG002 2 JAHKSD010000190.1	1125	0.593	0.847	0.842	0.631	TRUE	1341	SD and High GA/TC (80%)	SD and High GA/TC (80%)
chr15	4438650	4438651	99753195	+	2	JAHKSD010000380.1	0	1	33773	0	0	0	0	1	0	0	0	0	HPRC_PLUS	male	3140		EUR	PGP - Ashkenazim Jewish	HG002	HG002 2 JAHKSD010000380.1	1126	0.557	0.779	0.842	0.583	TRUE	1328	SD	SD and High GA/TC (80%)
chr15	4443531	4443532	99753195	-	2	JAHKSD010000304.1	0	1	89004	0	0	0	0	1	0	0	0	0	HPRC_PLUS	male	3140		EUR	PGP - Ashkenazim Jewish	HG002	HG002 2 JAHKSD010000304.1	1127	0.557	0.881	0.842	0.538	TRUE	1320	SD and High GA/TC (80%)	SD and High GA/TC (80%)
chr15	4445714	4445715	99753195	-	2	JAHKSD010000264.1	67842	67843	67843	0	0	0	0	1	0	0	0	0	HPRC_PLUS	male	3140		EUR	PGP - Ashkenazim Jewish	HG002	HG002 2 JAHKSD010000264.1	1128	0.557	0.881	0.837	0.538	TRUE	1320	SD and High GA/TC (80%)	SD and High GA/TC (80%)
chr15	4451814	4451815	99753195	-	2	JAHKSD010000168.1	54795	54796	54796	0	0	0	0	1	0	0	0	0	HPRC_PLUS	male	3140		EUR	PGP - Ashkenazim Jewish	HG002	HG002 2 JAHKSD010000168.1	1129	0.536	0.883	0.799	0.545	TRUE	1345	SD and High GA/TC (80%)	SD and High GA/TC (80%)
chr15	4452856	4452857	99753195	-	2	JAHKSD010000305.1	50177	50178	50178	0	0	0	0	1	0	0	0	0	HPRC_PLUS	male	3140		EUR	PGP - Ashkenazim Jewish	HG002	HG002 2 JAHKSD010000305.1	1130	0.536	0.883	0.783	0.545	TRUE	1343	SD and High GA/TC (80%)	SD and High GA/TC (80%)
chr15	4469974	4469975	99753195	-	2	JAHKSD010000007.1	0	1	93427	0	0	0	0	1	0	0	0	0	HPRC_PLUS	male	3140		EUR	PGP - Ashkenazim Jewish	HG002	HG002 2 JAHKSD010000007.1	1131	0.598	0.847	0.843	0.633	TRUE	1343	SD and High GA/TC (80%)	SD and High GA/TC (80%)
chr15	4470880	4470881	99753195	+	2	JAHKSD010000380.1	33772	33773	33773	0	0	0	0	1	0	0	0	0	HPRC_PLUS	male	3140		EUR	PGP - Ashkenazim Jewish	HG002	HG002 2 JAHKSD010000380.1	1132	0.598	0.847	0.843	0.633	TRUE	1354	SD and High GA/TC (80%)	SD and High GA/TC (80%)
chr15	4501439	4501440	99753195	-	2	JAHKSD010000305.1	0	1	50178	0	0	0	0	1	0	0	0	0	HPRC_PLUS	male	3140		EUR	PGP - Ashkenazim Jewish	HG002	HG002 2 JAHKSD010000305.1	1133	0.535	0.884	0.609	0.629	TRUE	1400	SD and High GA/TC (80%)	SD and High GA/TC (80%)
chr15	4506576	4506577	99753195	-	2	JAHKSD010000168.1	0	1	54796	0	0	0	0	1	0	0	0	0	HPRC_PLUS	male	3140		EUR	PGP - Ashkenazim Jewish	HG002	HG002 2 JAHKSD010000168.1	1134	0.589	0.884	0.609	0.629	TRUE	1396	SD and High GA/TC (80%)	SD and High GA/TC (80%)
chr15	4508152	4508153	99753195	+	2	JAHKSD010000307.1	0	1	50356	0	0	0	0	1	0	0	0	0	HPRC_PLUS	male	3140		EUR	PGP - Ashkenazim Jewish	HG002	HG002 2 JAHKSD010000307.1	1135	0.589	0.884	0.609	0.629	TRUE	1394	SD and High GA/TC (80%)	SD and High GA/TC (80%)
chr15	4509764	4509765	99753195	-	2	JAHKSD010000117.1	47662	47663	47663	0	0	0	0	1	0	0	0	0	HPRC_PLUS	male	3140		EUR	PGP - Ashkenazim Jewish	HG002	HG002 2 JAHKSD010000117.1	1136	0.589	0.882	0.765	0.629	TRUE	1395	SD and High GA/TC (80%)	SD and High GA/TC (80%)
chr15	4514545	4514546	99753195	-	2	JAHKSD010000264.1	0	1	67843	0	0	0	0	1	0	0	0	0	HPRC_PLUS	male	3140		EUR	PGP - Ashkenazim Jewish	HG002	HG002 2 JAHKSD010000264.1	1137	0.589	0.879	0.842	0.629	TRUE	1412	SD and High GA/TC (80%)	SD and High GA/TC (80%)
chr15	4518054	4518055	99753195	-	2	JAHKSD010000218.1	0	1	182825	0	0	0	0	1	0	0	0	0	HPRC_PLUS	male	3140		EUR	PGP - Ashkenazim Jewish	HG002	HG002 2 JAHKSD010000218.1	1138	0.589	0.812	0.842	0.629	TRUE	1413	SD and High GA/TC (80%)	SD and High GA/TC (80%)
chr15	4522439	4522440	99753195	+	2	JAHKSD010000273.1	0	1	45758	0	0	0	0	1	0	0	0	0	HPRC_PLUS	male	3140		EUR	PGP - Ashkenazim Jewish	HG002	HG002 2 JAHKSD010000273.1	1139	0.589	0.812	0.842	0.589	TRUE	1414	SD and High GA/TC (80%)	SD and High GA/TC (80%)
chr15	4523148	4523149	99753195	-	2	JAHKSD010000025.1	0	1	118902	0	0	0	0	1	0	0	0	0	HPRC_PLUS	male	3140		EUR	PGP - Ashkenazim Jewish	HG002	HG002 2 JAHKSD010000025.1	1140	0.589	0.812	0.842	0.589	TRUE	1413	SD and High GA/TC (80%)	SD and High GA/TC (80%)
chr15	4527871	4527872	99753195	-	2	JAHKSD010000142.1	49232	49233	49233	0	0	0	0	1	0	0	0	0	HPRC_PLUS	male	3140		EUR	PGP - Ashkenazim Jewish	HG002	HG002 2 JAHKSD010000142.1	1141	0.559	0.812	0.842	0.589	TRUE	1434	SD and High GA/TC (80%)	SD and High GA/TC (80%)
chr15	4555311	4555312	99753195	+	2	JAHKSD010000038.1	243395	243396	243396	0	0	0	0	1	0	0	0	0	HPRC_PLUS	male	3140		EUR	PGP - Ashkenazim Jewish	HG002	HG002 2 JAHKSD010000038.1	1142	0.588	0.883	0.766	0.633	TRUE	1446	SD and High GA/TC (80%)	SD and High GA/TC (80%)
chr15	4555560	4555561	99753195	+	2	JAHKSD010000383.1	0	1	55696	0	0	0	0	1	0	0	0	0	HPRC_PLUS	male	3140		EUR	PGP - Ashkenazim Jewish	HG002	HG002 2 JAHKSD010000383.1	1143	0.588	0.883	0.775	0.633	TRUE	1443	SD and High GA/TC (80%)	SD and High GA/TC (80%)
chr15	4556643	4556644	99753195	-	2	JAHKSD010000117.1	4	5	47663	0	0	0	0	1	0	0	0	0	HPRC_PLUS	male	3140		EUR	PGP - Ashkenazim Jewish	HG002	HG002 2 JAHKSD010000117.1	1144	0.588	0.883	0.775	0.633	TRUE	1438	SD and High GA/TC (80%)	SD and High GA/TC (80%)
chr15	4558055	4558056	99753195	+	2	JAHKSD010000307.1	50355	50356	50356	0	0	0	0	1	0	0	0	0	HPRC_PLUS	male	3140		EUR	PGP - Ashkenazim Jewish	HG002	HG002 2 JAHKSD010000307.1	1145	0.588	0.883	0.842	0.633	TRUE	1429	SD and High GA/TC (80%)	SD and High GA/TC (80%)
chr15	4562442	4562443	99753195	-	2	JAHKSD010000020.1	104732	104733	104733	0	0	0	0	1	0	0	0	0	HPRC_PLUS	male	3140		EUR	PGP - Ashkenazim Jewish	HG002	HG002 2 JAHKSD010000020.1	1146	0.588	0.846	0.842	0.633	TRUE	1463	SD and High GA/TC (80%)	SD and High GA/TC (80%)
chr15	4566613	4566614	99753195	+	2	JAHKSD010000273.1	45757	45758	45758	0	0	0	0	1	0	0	0	0	HPRC_PLUS	male	3140		EUR	PGP - Ashkenazim Jewish	HG002	HG002 2 JAHKSD010000273.1	1147	0.588	0.817	0.842	0.589	TRUE	1562	SD and High GA/TC (80%)	SD and High GA/TC (80%)
chr15	4577429	4577430	99753195	-	2	JAHKSD010000222.1	95612	95613	95613	0	0	0	0	1	0	0	0	0	HPRC_PLUS	male	3140		EUR	PGP - Ashkenazim Jewish	HG002	HG002 2 JAHKSD010000222.1	1148	0.558	0.872	0.842	0.535	TRUE	1568	SD and High GA/TC (80%)	SD and High GA/TC (80%)
chr15	4578478	4578479	99753195	-	2	JAHKSD010000142.1	0	1	49233	0	0	0	0	1	0	0	0	0	HPRC_PLUS	male	3140		EUR	PGP - Ashkenazim Jewish	HG002	HG002 2 JAHKSD010000142.1	1149	0.558	0.88	0.842	0.535	TRUE	1568	SD and High GA/TC (80%)	SD and High GA/TC (80%)
chr15	4580332	4580333	99753195	-	2	JAHKSD010000393.1	49498	49499	49499	0	0	0	0	1	0	0	0	0	HPRC_PLUS	male	3140		EUR	PGP - Ashkenazim Jewish	HG002	HG002 2 JAHKSD010000393.1	1150	0.558	0.88	0.838	0.535	TRUE	1573	SD and High GA/TC (80%)	SD and High GA/TC (80%)
chr15	4612238	4612239	99753195	+	2	JAHKSD010000383.1	55695	55696	55696	0	0	0	0	1	0	0	0	0	HPRC_PLUS	male	3140		EUR	PGP - Ashkenazim Jewish	HG002	HG002 2 JAHKSD010000383.1	1151	0.598	0.813	0.843	0.585	TRUE	1397	SD and High GA/TC (80%)	SD and High GA/TC (80%)
chr15	4616695	4616696	99753195	+	2	JAHKSD010000373.1	0	1	55158	0	0	0	0	1	0	0	0	0	HPRC_PLUS	male	3140		EUR	PGP - Ashkenazim Jewish	HG002	HG002 2 JAHKSD010000373.1	1152	0.557	0.813	0.843	0.585	TRUE	1369	SD and High GA/TC (80%)	SD and High GA/TC (80%)
chr15	4629851	4629852	99753195	-	2	JAHKSD010000393.1	0	1	49499	0	0	0	0	1	0	0	0	0	HPRC_PLUS	male	3140		EUR	PGP - Ashkenazim Jewish	HG002	HG002 2 JAHKSD010000393.1	1153	0.557	0.883	0.794	0.542	TRUE	1295	SD and High GA/TC (80%)	SD and High GA/TC (80%)
chr15	4664518	4664519	99753195	+	2	JAHKSD010000141.1	0	1	28666	0	0	0	0	1	0	0	0	0	HPRC_PLUS	male	3140		EUR	PGP - Ashkenazim Jewish	HG002	HG002 2 JAHKSD010000141.1	1154	0.558	0.779	0.841	0.525	TRUE	1040	SD	SD and High GA/TC (80%)
chr15	4665656	4665657	99753195	-	2	JAHKSD010000020.1	0	1	104733	0	0	0	0	1	0	0	0	0	HPRC_PLUS	male	3140		EUR	PGP - Ashkenazim Jewish	HG002	HG002 2 JAHKSD010000020.1	1155	0.558	0.779	0.841	0.525	TRUE	1036	SD	SD and High GA/TC (80%)
chr15	4667693	4667694	99753195	-	2	JAHKSD010000318.1	30589	30590	30590	0	0	0	0	1	0	0	0	0	HPRC_PLUS	male	3140		EUR	PGP - Ashkenazim Jewish	HG002	HG002 2 JAHKSD010000318.1	1156	0.558	0.882	0.841	0.543	TRUE	1024	SD and High GA/TC (80%)	SD and High GA/TC (80%)
chr15	4671401	4671402	99753195	-	2	JAHKSD010000222.1	0	1	95613	0	0	0	0	1	0	0	0	0	HPRC_PLUS	male	3140		EUR	PGP - Ashkenazim Jewish	HG002	HG002 2 JAHKSD010000222.1	1157	0.558	0.885	0.838	0.543	TRUE	994	SD and High GA/TC (80%)	SD and High GA/TC (80%)
chr15	4673653	4673654	99753195	+	2	JAHKSD010000373.1	55157	55158	55158	0	0	0	0	1	0	0	0	0	HPRC_PLUS	male	3140		EUR	PGP - Ashkenazim Jewish	HG002	HG002 2 JAHKSD010000373.1	1158	0.558	0.885	0.814	0.543	TRUE	985	SD and High GA/TC (80%)	SD and High GA/TC (80%)
chr15	4693133	4693134	99753195	+	2	JAHKSD010000141.1	28665	28666	28666	0	0	0	0	1	0	0	0	0	HPRC_PLUS	male	3140		EUR	PGP - Ashkenazim Jewish	HG002	HG002 2 JAHKSD010000141.1	1159	0.594	0.884	0.801	0.632	TRUE	832	SD and High GA/TC (80%)	SD and High GA/TC (80%)
chr15	4698292	4698293	99753195	-	2	JAHKSD010000318.1	0	1	30590	0	0	0	0	1	0	0	0	0	HPRC_PLUS	male	3140		EUR	PGP - Ashkenazim Jewish	HG002	HG002 2 JAHKSD010000318.1	1160	0.594	0.851	0.84	0.632	TRUE	794	SD and High GA/TC (80%)	SD and High GA/TC (80%)
chr15	6185537	6185538	99753195	+	2	JAHKSD010000341.1	2	3	242871	0	0	0	0	1	0	0	0	0	HPRC_PLUS	male	3140		EUR	PGP - Ashkenazim Jewish	HG002	HG002 2 JAHKSD010000341.1	1161	0.318	0.719	0.408	0.623	TRUE	12	Satellite	Satellite
chr15	6223987	6223988	99753195	+	2	JAHKSD010000110.1	1791270	1791271	1791271	0	0	0	0	1	0	0	0	0	HPRC_PLUS	male	3140		EUR	PGP - Ashkenazim Jewish	HG002	HG002 2 JAHKSD010000110.1	1162	0.315	0.719	0.408	0.621	TRUE	12	Satellite	Satellite
chr15	6432291	6432292	99753195	+	2	JAHKSD010000341.1	242870	242871	242871	0	0	0	0	1	0	0	0	0	HPRC_PLUS	male	3140		EUR	PGP - Ashkenazim Jewish	HG002	HG002 2 JAHKSD010000341.1	1163	0.301	0.725	0.403	0.621	TRUE	5	10% Low Complexity	Satellite
chr15	7059355	7059356	99753195	+	2	JAHKSD010000339.1	309741	309742	309742	0	0	0	0	1	0	0	0	0	HPRC_PLUS	male	3140		EUR	PGP - Ashkenazim Jewish	HG002	HG002 2 JAHKSD010000339.1	1164	0.302	0.734	0.403	0.618	FALSE	6	10% Low Complexity	Satellite
chr15	7094137	7094138	99753195	+	2	JAHKSD010000339.1	20	21	309742	0	0	0	0	1	0	0	0	0	HPRC_PLUS	male	3140		EUR	PGP - Ashkenazim Jewish	HG002	HG002 2 JAHKSD010000339.1	1165	0.302	0.736	0.401	0.624	FALSE	6	Satellite	Satellite
chr15	7205299	7205300	99753195	-	2	JAHKSD010000094.1	9732799	9732800	9732800	0	0	0	0	1	0	0	0	0	HPRC_PLUS	male	3140		EUR	PGP - Ashkenazim Jewish	HG002	HG002 2 JAHKSD010000094.1	1166	0.302	0.726	0.402	0.621	FALSE	5	Satellite	Satellite
chr15	16976080	16976081	99753195	+	2	JAHKSD010000064.1	0	1	81610451	0	0	0	0	1	0	0	0	0	HPRC_PLUS	male	3140		EUR	PGP - Ashkenazim Jewish	HG002	HG002 2 JAHKSD010000064.1	1167	0.506	0.519	0.393	0.631	FALSE	97	Alpha	Satellite
chr15	17269187	17269188	99753195	-	2	JAHKSD010000094.1	0	1	9732800	0	0	0	0	1	0	0	0	0	HPRC_PLUS	male	3140		EUR	PGP - Ashkenazim Jewish	HG002	HG002 2 JAHKSD010000094.1	1168	0.505	0.52	0.391	0.631	FALSE	29	Alpha	Satellite
chr15	98606803	98606804	99753195	+	2	JAHKSD010000123.1	9	10	1151686	0	0	0	0	1	0	0	0	0	HPRC_PLUS	male	3140		EUR	PGP - Ashkenazim Jewish	HG002	HG002 2 JAHKSD010000123.1	1169	0.59	0.556	0.629	0.681	FALSE	2	Poisson breaks	Chromosome end or Poisson
chr15	98624097	98624098	99753195	+	2	JAHKSD010000064.1	81610450	81610451	81610451	0	0	0	0	1	0	0	0	0	HPRC_PLUS	male	3140		EUR	PGP - Ashkenazim Jewish	HG002	HG002 2 JAHKSD010000064.1	1170	0.565	0.556	0.75	0.61	FALSE	2	Poisson breaks	Chromosome end or Poisson
chr15	99749036	99749037	99753195	+	2	JAHKSD010000123.1	1151685	1151686	1151686	0	0	0	0	1	0	0	0	0	HPRC_PLUS	male	3140		EUR	PGP - Ashkenazim Jewish	HG002	HG002 2 JAHKSD010000123.1	1171	0.674	0.572	0.746	0.517	FALSE	114	Chromosome end	Chromosome end or Poisson
chr16	0	1	96330374	+	2	JAHKSD010000024.1	3334	3335	15238496	0	0	0	0	1	0	0	0	0	HPRC_PLUS	male	3140		EUR	PGP - Ashkenazim Jewish	HG002	HG002 2 JAHKSD010000024.1	1172	0.615	0.693	0.821	0.506	FALSE	54	Chromosome end	Chromosome end or Poisson
chr16	14935132	14935133	96330374	-	2	JAHKSD010000071.1	0	1	81496	0	0	0	0	1	0	0	0	0	HPRC_PLUS	male	3140		EUR	PGP - Ashkenazim Jewish	HG002	HG002 2 JAHKSD010000071.1	1173	0.577	0.992	0.691	0.642	FALSE	82	SD and High GA/TC (80%)	SD and High GA/TC (80%)
chr16	14935625	14935626	96330374	-	2	JAHKSD010000024.1	15238495	15238496	15238496	0	0	0	0	1	0	0	0	0	HPRC_PLUS	male	3140		EUR	PGP - Ashkenazim Jewish	HG002	HG002 2 JAHKSD010000024.1	1174	0.577	0.992	0.691	0.642	FALSE	82	SD and High GA/TC (80%)	SD and High GA/TC (80%)
chr16	15139710	15139711	96330374	-	2	JAHKSD010000085.1	6711	6712	6269573	0	0	0	0	1	0	0	0	0	HPRC_PLUS	male	3140		EUR	PGP - Ashkenazim Jewish	HG002	HG002 2 JAHKSD010000085.1	1175	0.992	0.548	0.71	0.526	FALSE	60	SD and High GA/TC (80%)	SD and High GA/TC (80%)
chr16	16388093	16388094	96330374	+	2	JAHKSD010000071.1	81495	81496	81496	0	0	0	0	1	0	0	0	0	HPRC_PLUS	male	3140		EUR	PGP - Ashkenazim Jewish	HG002	HG002 2 JAHKSD010000071.1	1176	0.574	0.99	0.688	0.641	FALSE	109	SD and High GA/TC (80%)	SD and High GA/TC (80%)
chr16	21352918	21352919	96330374	+	2	JAHKSD010000159.1	0	1	360898	0	0	0	0	1	0	0	0	0	HPRC_PLUS	male	3140		EUR	PGP - Ashkenazim Jewish	HG002	HG002 2 JAHKSD010000159.1	1177	0.61	0.568	0.574	0.638	FALSE	23	SD	SD and High GA/TC (80%)
chr16	21370871	21370872	96330374	+	2	JAHKSD010000085.1	6269572	6269573	6269573	0	0	0	0	1	0	0	0	0	HPRC_PLUS	male	3140		EUR	PGP - Ashkenazim Jewish	HG002	HG002 2 JAHKSD010000085.1	1178	0.602	0.582	0.529	0.645	FALSE	28	SD	SD and High GA/TC (80%)
chr16	21701371	21701372	96330374	-	2	JAHKSD010000100.1	8006602	8006603	8006603	0	0	0	0	1	0	0	0	0	HPRC_PLUS	male	3140		EUR	PGP - Ashkenazim Jewish	HG002	HG002 2 JAHKSD010000100.1	1179	0.608	0.577	0.573	0.639	FALSE	30	SD	SD and High GA/TC (80%)
chr16	21713740	21713741	96330374	+	2	JAHKSD010000159.1	360897	360898	360898	0	0	0	0	1	0	0	0	0	HPRC_PLUS	male	3140		EUR	PGP - Ashkenazim Jewish	HG002	HG002 2 JAHKSD010000159.1	1180	0.605	0.579	0.524	0.628	FALSE	29	SD	SD and High GA/TC (80%)
chr16	29815065	29815066	96330374	-	2	JAHKSD010000100.1	0	1	8006603	0	0	0	0	1	0	0	0	0	HPRC_PLUS	male	3140		EUR	PGP - Ashkenazim Jewish	HG002	HG002 2 JAHKSD010000100.1	1181	0.604	0.617	0.521	0.679	FALSE	22	SD	SD and High GA/TC (80%)
chr16	29822906	29822907	96330374	+	2	JAHKSD010000074.1	0	1	683147	0	0	0	0	1	0	0	0	0	HPRC_PLUS	male	3140		EUR	PGP - Ashkenazim Jewish	HG002	HG002 2 JAHKSD010000074.1	1182	0.593	0.617	0.496	0.712	FALSE	21	SD	SD and High GA/TC (80%)
chr16	30074225	30074226	96330374	-	2	JAHKSD010000148.1	12038530	12038531	12038531	0	0	0	0	1	0	0	0	0	HPRC_PLUS	male	3140		EUR	PGP - Ashkenazim Jewish	HG002	HG002 2 JAHKSD010000148.1	1183	0.607	0.6	0.652	0.614	FALSE	3	other	other
chr16	30506614	30506615	96330374	+	2	JAHKSD010000074.1	683146	683147	683147	0	0	0	0	1	0	0	0	0	HPRC_PLUS	male	3140		EUR	PGP - Ashkenazim Jewish	HG002	HG002 2 JAHKSD010000074.1	1184	0.605	0.57	0.599	0.645	FALSE	49	SD	SD and High GA/TC (80%)
chr16	37209799	37209800	96330374	-	2	JAHKSD010000194.1	377044	377045	377045	0	0	0	0	1	0	0	0	0	HPRC_PLUS	male	3140		EUR	PGP - Ashkenazim Jewish	HG002	HG002 2 JAHKSD010000194.1	1185	0.505	0.515	0.402	0.613	FALSE	48	Alpha	Satellite
chr16	37677883	37677884	96330374	-	2	JAHKSD010000194.1	0	1	377045	0	0	0	0	1	0	0	0	0	HPRC_PLUS	male	3140		EUR	PGP - Ashkenazim Jewish	HG002	HG002 2 JAHKSD010000194.1	1186	0.502	0.514	0.401	0.612	FALSE	20	Alpha	Satellite
chr16	40771983	40771984	96330374	-	2	JAHKSD010000148.1	0	1	12038531	100	100	100	1	0	0	0	0	0	HPRC_PLUS	male	3140		EUR	PGP - Ashkenazim Jewish	HG002	HG002 2 JAHKSD010000148.1	1187	0.404	0.634	0.383	0.653	FALSE	56	Satellite	Satellite
chr16	41256870	41256871	96330374	+	2	JAHKSD010000188.1	2584441	2584442	2584752	0	0	0	0	1	0	0	0	0	HPRC_PLUS	male	3140		EUR	PGP - Ashkenazim Jewish	HG002	HG002 2 JAHKSD010000188.1	1188	0.403	0.634	0.382	0.653	FALSE	21	Satellite	Satellite
chr16	49049855	49049856	96330374	+	2	JAHKSD010000188.1	0	1	2584752	100	100	100	1	0	0	0	0	0	HPRC_PLUS	male	3140		EUR	PGP - Ashkenazim Jewish	HG002	HG002 2 JAHKSD010000188.1	1189	0.403	0.631	0.381	0.652	FALSE	10	Satellite	Satellite
chr16	50716751	50716752	96330374	+	2	JAHKSD010000358.1	0	1	66051	0	0	0	0	1	0	0	0	0	HPRC_PLUS	male	3140		EUR	PGP - Ashkenazim Jewish	HG002	HG002 2 JAHKSD010000358.1	1190	0.403	0.627	0.382	0.652	FALSE	8	Satellite	Satellite
chr16	50742160	50742161	96330374	+	2	JAHKSD010000358.1	65177	65178	66051	0	0	0	0	1	0	0	0	0	HPRC_PLUS	male	3140		EUR	PGP - Ashkenazim Jewish	HG002	HG002 2 JAHKSD010000358.1	1191	0.403	0.629	0.382	0.649	FALSE	9	Satellite	Satellite
chr16	51613211	51613212	96330374	-	2	JAHKSD010000122.1	11062813	11062814	11062814	100	100	100	1	0	0	0	0	0	HPRC_PLUS	male	3140		EUR	PGP - Ashkenazim Jewish	HG002	HG002 2 JAHKSD010000122.1	1192	0.401	0.628	0.382	0.65	FALSE	51	Satellite	Satellite
chr16	61586223	61586224	96330374	+	2	JAHKSD010000070.1	0	1	34520273	0	0	0	0	1	0	0	0	0	HPRC_PLUS	male	3140		EUR	PGP - Ashkenazim Jewish	HG002	HG002 2 JAHKSD010000070.1	1193	0.632	0.634	0.536	0.683	FALSE	46	SD	SD and High GA/TC (80%)
chr16	61600890	61600891	96330374	-	2	JAHKSD010000122.1	0	1	11062814	0	0	0	0	1	0	0	0	0	HPRC_PLUS	male	3140		EUR	PGP - Ashkenazim Jewish	HG002	HG002 2 JAHKSD010000122.1	1194	0.632	0.634	0.534	0.683	FALSE	46	SD	SD and High GA/TC (80%)
chr16	96330373	96330374	96330374	+	2	JAHKSD010000070.1	34518374	34518375	34520273	0	0	0	0	1	0	0	0	0	HPRC_PLUS	male	3140		EUR	PGP - Ashkenazim Jewish	HG002	HG002 2 JAHKSD010000070.1	1195	0.686	0.624	0.796	0.672	FALSE	68	Chromosome end	Chromosome end or Poisson
chr17	2090	2091	84276897	+	2	JAHKSD010000022.1	4972	4973	19580177	0	0	0	0	1	0	0	0	0	HPRC_PLUS	male	3140		EUR	PGP - Ashkenazim Jewish	HG002	HG002 2 JAHKSD010000022.1	1196	0.604	0.668	0.568	0.651	FALSE	90	Chromosome end	Chromosome end or Poisson
chr17	19714054	19714055	84276897	+	2	JAHKSD010000091.1	0	1	5338060	0	0	0	0	1	0	0	0	0	HPRC_PLUS	male	3140		EUR	PGP - Ashkenazim Jewish	HG002	HG002 2 JAHKSD010000091.1	1197	0.608	0.635	0.621	0.689	FALSE	3	other	other
chr17	19731563	19731564	84276897	+	2	JAHKSD010000022.1	19580176	19580177	19580177	0	0	0	0	1	0	0	0	0	HPRC_PLUS	male	3140		EUR	PGP - Ashkenazim Jewish	HG002	HG002 2 JAHKSD010000022.1	1198	0.631	0.567	0.533	0.689	FALSE	2	Poisson breaks	Chromosome end or Poisson
chr17	24934122	24934123	84276897	-	2	JAHKSD010000197.1	423962	423963	423963	0	0	0	0	1	0	0	0	0	HPRC_PLUS	male	3140		EUR	PGP - Ashkenazim Jewish	HG002	HG002 2 JAHKSD010000197.1	1199	0.523	0.514	0.415	0.6	FALSE	42	Alpha	Satellite
chr17	24999369	24999370	84276897	+	2	JAHKSD010000091.1	5338059	5338060	5338060	0	0	0	0	1	0	0	0	0	HPRC_PLUS	male	3140		EUR	PGP - Ashkenazim Jewish	HG002	HG002 2 JAHKSD010000091.1	1200	0.521	0.514	0.414	0.601	FALSE	46	Alpha	Satellite
chr17	25120280	25120281	84276897	-	2	JAHKSD010000354.1	232977	232978	233049	0	0	0	0	1	0	0	0	0	HPRC_PLUS	male	3140		EUR	PGP - Ashkenazim Jewish	HG002	HG002 2 JAHKSD010000354.1	1201	0.521	0.514	0.418	0.602	FALSE	83	Alpha	Satellite
chr17	25138966	25138967	84276897	+	2	JAHKSD010000340.1	0	1	214966	0	0	0	0	1	0	0	0	0	HPRC_PLUS	male	3140		EUR	PGP - Ashkenazim Jewish	HG002	HG002 2 JAHKSD010000340.1	1202	0.523	0.516	0.416	0.6	FALSE	90	Alpha	Satellite
chr17	25358419	25358420	84276897	-	2	JAHKSD010000197.1	0	1	423963	0	0	0	0	1	0	0	0	0	HPRC_PLUS	male	3140		EUR	PGP - Ashkenazim Jewish	HG002	HG002 2 JAHKSD010000197.1	1203	0.523	0.514	0.414	0.602	FALSE	37	Alpha	Satellite
chr17	25359349	25359350	84276897	+	2	JAHKSD010000340.1	214965	214966	214966	0	0	0	0	1	0	0	0	0	HPRC_PLUS	male	3140		EUR	PGP - Ashkenazim Jewish	HG002	HG002 2 JAHKSD010000340.1	1204	0.523	0.514	0.414	0.602	FALSE	37	Alpha	Satellite
chr17	25694859	25694860	84276897	+	2	JAHKSD010000311.1	2093	2094	523334	0	0	0	0	1	0	0	0	0	HPRC_PLUS	male	3140		EUR	PGP - Ashkenazim Jewish	HG002	HG002 2 JAHKSD010000311.1	1205	0.523	0.517	0.414	0.602	FALSE	63	Alpha	Satellite
chr17	25855913	25855914	84276897	-	2	JAHKSD010000354.1	3715	3716	233049	0	0	0	0	1	0	0	0	0	HPRC_PLUS	male	3140		EUR	PGP - Ashkenazim Jewish	HG002	HG002 2 JAHKSD010000354.1	1206	0.523	0.515	0.415	0.601	FALSE	46	Alpha	Satellite
chr17	26149047	26149048	84276897	-	2	JAHKSD010000285.1	97492	97493	97493	0	0	0	0	1	0	0	0	0	HPRC_PLUS	male	3140		EUR	PGP - Ashkenazim Jewish	HG002	HG002 2 JAHKSD010000285.1	1207	0.523	0.516	0.414	0.602	FALSE	121	Alpha	Satellite
chr17	26217297	26217298	84276897	+	2	JAHKSD010000311.1	523333	523334	523334	0	0	0	0	1	0	0	0	0	HPRC_PLUS	male	3140		EUR	PGP - Ashkenazim Jewish	HG002	HG002 2 JAHKSD010000311.1	1208	0.52	0.515	0.416	0.602	FALSE	145	Alpha	Satellite
chr17	26246555	26246556	84276897	-	2	JAHKSD010000285.1	0	1	97493	0	0	0	0	1	0	0	0	0	HPRC_PLUS	male	3140		EUR	PGP - Ashkenazim Jewish	HG002	HG002 2 JAHKSD010000285.1	1209	0.523	0.516	0.414	0.603	FALSE	146	Alpha	Satellite
chr17	26361271	26361272	84276897	+	2	JAHKSD010000367.1	0	1	204148	0	0	0	0	1	0	0	0	0	HPRC_PLUS	male	3140		EUR	PGP - Ashkenazim Jewish	HG002	HG002 2 JAHKSD010000367.1	1210	0.523	0.518	0.417	0.602	FALSE	114	Alpha	Satellite
chr17	26399577	26399578	84276897	-	2	JAHKSD010000047.1	57756589	57756590	57759760	0	0	0	0	1	0	0	0	0	HPRC_PLUS	male	3140		EUR	PGP - Ashkenazim Jewish	HG002	HG002 2 JAHKSD010000047.1	1211	0.524	0.516	0.414	0.602	FALSE	105	Alpha	Satellite
chr17	26466475	26466476	84276897	-	2	JAHKSD010000260.1	183971	183972	191483	0	0	0	0	1	0	0	0	0	HPRC_PLUS	male	3140		EUR	PGP - Ashkenazim Jewish	HG002	HG002 2 JAHKSD010000260.1	1212	0.521	0.517	0.415	0.602	FALSE	98	Alpha	Satellite
chr17	26563545	26563546	84276897	+	2	JAHKSD010000367.1	204147	204148	204148	0	0	0	0	1	0	0	0	0	HPRC_PLUS	male	3140		EUR	PGP - Ashkenazim Jewish	HG002	HG002 2 JAHKSD010000367.1	1213	0.523	0.515	0.414	0.6	FALSE	85	Alpha	Satellite
chr17	26653162	26653163	84276897	-	2	JAHKSD010000260.1	0	1	191483	0	0	0	0	1	0	0	0	0	HPRC_PLUS	male	3140		EUR	PGP - Ashkenazim Jewish	HG002	HG002 2 JAHKSD010000260.1	1214	0.524	0.514	0.415	0.601	FALSE	228	Alpha	Satellite
chr17	38012192	38012193	84276897	+	2	JAHKSD010000155.1	0	1	277942	0	0	0	0	1	0	0	0	0	HPRC_PLUS	male	3140		EUR	PGP - Ashkenazim Jewish	HG002	HG002 2 JAHKSD010000155.1	1215	0.6	0.612	0.499	0.716	FALSE	1	Poisson breaks	Chromosome end or Poisson
chr17	38290190	38290191	84276897	+	2	JAHKSD010000155.1	277941	277942	277942	0	0	0	0	1	0	0	0	0	HPRC_PLUS	male	3140		EUR	PGP - Ashkenazim Jewish	HG002	HG002 2 JAHKSD010000155.1	1216	0.644	0.584	0.497	0.677	FALSE	1	Poisson breaks	Chromosome end or Poisson
chr17	39029688	39029689	84276897	-	2	JAHKSD010000306.1	0	1	174847	100	100	100	1	0	0	0	0	0	HPRC_PLUS	male	3140		EUR	PGP - Ashkenazim Jewish	HG002	HG002 2 JAHKSD010000306.1	1217	0.6	0.611	0.519	0.68	FALSE	46	SD	SD and High GA/TC (80%)
chr17	39032708	39032709	84276897	+	2	JAHKSD010000306.1	174846	174847	174847	0	0	0	0	1	0	0	0	0	HPRC_PLUS	male	3140		EUR	PGP - Ashkenazim Jewish	HG002	HG002 2 JAHKSD010000306.1	1218	0.6	0.611	0.585	0.68	FALSE	46	SD	SD and High GA/TC (80%)
chr17	84276873	84276874	84276897	-	2	JAHKSD010000047.1	370	371	57759760	0	0	0	0	1	0	0	0	0	HPRC_PLUS	male	3140		EUR	PGP - Ashkenazim Jewish	HG002	HG002 2 JAHKSD010000047.1	1219	0.669	0.576	0.77	0.672	FALSE	99	Chromosome end	Chromosome end or Poisson
chr18	163563	163564	80542538	+	2	JAHKSD010000056.1	4325	4326	17093239	0	0	0	0	1	0	0	0	0	HPRC_PLUS	male	3140		EUR	PGP - Ashkenazim Jewish	HG002	HG002 2 JAHKSD010000056.1	1220	0.615	0.633	0.732	0.724	FALSE	97	Chromosome end	Chromosome end or Poisson
chr18	16534153	16534154	80542538	+	2	JAHKSD010000135.1	0	1	1292392	0	0	0	0	1	0	0	0	0	HPRC_PLUS	male	3140		EUR	PGP - Ashkenazim Jewish	HG002	HG002 2 JAHKSD010000135.1	1221	0.521	0.494	0.404	0.617	FALSE	10	Alpha	Satellite
chr18	17790951	17790952	80542538	+	2	JAHKSD010000135.1	1292391	1292392	1292392	0	0	0	0	1	0	0	0	0	HPRC_PLUS	male	3140		EUR	PGP - Ashkenazim Jewish	HG002	HG002 2 JAHKSD010000135.1	1222	0.522	0.5	0.405	0.615	FALSE	65	Alpha	Satellite
chr18	18278459	18278460	80542538	+	2	JAHKSD010000248.1	0	1	99110	0	0	0	0	1	0	0	0	0	HPRC_PLUS	male	3140		EUR	PGP - Ashkenazim Jewish	HG002	HG002 2 JAHKSD010000248.1	1223	0.521	0.494	0.406	0.608	FALSE	129	Alpha	Satellite
chr18	18377561	18377562	80542538	+	2	JAHKSD010000248.1	99105	99106	99110	0	0	0	0	1	0	0	0	0	HPRC_PLUS	male	3140		EUR	PGP - Ashkenazim Jewish	HG002	HG002 2 JAHKSD010000248.1	1224	0.523	0.496	0.406	0.608	FALSE	99	Alpha	Satellite
chr18	18612161	18612162	80542538	-	2	JAHKSD010000214.1	247797	247798	248181	0	0	0	0	1	0	0	0	0	HPRC_PLUS	male	3140		EUR	PGP - Ashkenazim Jewish	HG002	HG002 2 JAHKSD010000214.1	1225	0.522	0.496	0.406	0.607	FALSE	37	Alpha	Satellite
chr18	18962656	18962657	80542538	-	2	JAHKSD010000382.1	123129	123130	126978	0	0	0	0	1	0	0	0	0	HPRC_PLUS	male	3140		EUR	PGP - Ashkenazim Jewish	HG002	HG002 2 JAHKSD010000382.1	1226	0.521	0.496	0.405	0.611	FALSE	331	Alpha	Satellite
chr18	19010690	19010691	80542538	-	2	JAHKSD010000388.1	39931	39932	39932	0	0	0	0	1	0	0	0	0	HPRC_PLUS	male	3140		EUR	PGP - Ashkenazim Jewish	HG002	HG002 2 JAHKSD010000388.1	1227	0.523	0.494	0.404	0.611	FALSE	392	Alpha	Satellite
chr18	19045998	19045999	80542538	-	2	JAHKSD010000388.1	1577	1578	39932	0	0	0	0	1	0	0	0	0	HPRC_PLUS	male	3140		EUR	PGP - Ashkenazim Jewish	HG002	HG002 2 JAHKSD010000388.1	1228	0.521	0.495	0.405	0.613	FALSE	433	Alpha	Satellite
chr18	19049909	19049910	80542538	-	2	JAHKSD010000092.1	6028046	6028047	6029305	0	0	0	0	1	0	0	0	0	HPRC_PLUS	male	3140		EUR	PGP - Ashkenazim Jewish	HG002	HG002 2 JAHKSD010000092.1	1229	0.521	0.495	0.405	0.613	FALSE	435	Alpha	Satellite
chr18	19056628	19056629	80542538	-	2	JAHKSD010000214.1	6	7	248181	0	0	0	0	1	0	0	0	0	HPRC_PLUS	male	3140		EUR	PGP - Ashkenazim Jewish	HG002	HG002 2 JAHKSD010000214.1	1230	0.521	0.495	0.406	0.614	FALSE	435	Alpha	Satellite
chr18	19136569	19136570	80542538	-	2	JAHKSD010000364.1	53	54	149441	0	0	0	0	1	0	0	0	0	HPRC_PLUS	male	3140		EUR	PGP - Ashkenazim Jewish	HG002	HG002 2 JAHKSD010000364.1	1231	0.522	0.494	0.405	0.611	FALSE	320	Alpha	Satellite
chr18	19192917	19192918	80542538	+	2	JAHKSD010000401.1	0	1	67101	0	0	0	0	1	0	0	0	0	HPRC_PLUS	male	3140		EUR	PGP - Ashkenazim Jewish	HG002	HG002 2 JAHKSD010000401.1	1232	0.522	0.494	0.406	0.61	FALSE	220	Alpha	Satellite
chr18	19258319	19258320	80542538	+	2	JAHKSD010000401.1	67100	67101	67101	0	0	0	0	1	0	0	0	0	HPRC_PLUS	male	3140		EUR	PGP - Ashkenazim Jewish	HG002	HG002 2 JAHKSD010000401.1	1233	0.523	0.496	0.405	0.61	FALSE	143	Alpha	Satellite
chr18	19282839	19282840	80542538	+	2	JAHKSD010000327.1	0	1	60709	0	0	0	0	1	0	0	0	0	HPRC_PLUS	male	3140		EUR	PGP - Ashkenazim Jewish	HG002	HG002 2 JAHKSD010000327.1	1234	0.522	0.495	0.405	0.617	FALSE	143	Alpha	Satellite
chr18	19304192	19304193	80542538	-	2	JAHKSD010000382.1	0	1	126978	0	0	0	0	1	0	0	0	0	HPRC_PLUS	male	3140		EUR	PGP - Ashkenazim Jewish	HG002	HG002 2 JAHKSD010000382.1	1235	0.52	0.495	0.406	0.614	FALSE	137	Alpha	Satellite
chr18	19342813	19342814	80542538	+	2	JAHKSD010000327.1	58273	58274	60709	0	0	0	0	1	0	0	0	0	HPRC_PLUS	male	3140		EUR	PGP - Ashkenazim Jewish	HG002	HG002 2 JAHKSD010000327.1	1236	0.522	0.495	0.405	0.612	FALSE	104	Alpha	Satellite
chr18	19365716	19365717	80542538	+	2	JAHKSD010000056.1	17093217	17093218	17093239	100	100	100	1	0	0	0	0	0	HPRC_PLUS	male	3140		EUR	PGP - Ashkenazim Jewish	HG002	HG002 2 JAHKSD010000056.1	1237	0.521	0.495	0.405	0.612	FALSE	95	Alpha	Satellite
chr18	19553873	19553874	80542538	-	2	JAHKSD010000364.1	149440	149441	149441	0	0	0	0	1	0	0	0	0	HPRC_PLUS	male	3140		EUR	PGP - Ashkenazim Jewish	HG002	HG002 2 JAHKSD010000364.1	1238	0.521	0.497	0.403	0.611	FALSE	56	Alpha	Satellite
chr18	25227760	25227761	80542538	-	2	JAHKSD010000092.1	0	1	6029305	0	0	0	0	1	0	0	0	0	HPRC_PLUS	male	3140		EUR	PGP - Ashkenazim Jewish	HG002	HG002 2 JAHKSD010000092.1	1239	0.912	0.58	0.584	0.721	FALSE	126	High GA/TC (80%)	High GA/TC (80%)
chr18	25228887	25228888	80542538	-	2	JAHKSD010000095.1	55119984	55119985	55119985	0	0	0	0	1	0	0	0	0	HPRC_PLUS	male	3140		EUR	PGP - Ashkenazim Jewish	HG002	HG002 2 JAHKSD010000095.1	1240	0.912	0.58	0.584	0.66	FALSE	126	High GA/TC (80%)	High GA/TC (80%)
chr18	80534523	80534524	80542538	-	2	JAHKSD010000095.1	0	1	55119985	0	0	0	0	1	0	0	0	0	HPRC_PLUS	male	3140		EUR	PGP - Ashkenazim Jewish	HG002	HG002 2 JAHKSD010000095.1	1241	0.734	0.621	0.668	0.651	FALSE	94	Chromosome end	Chromosome end or Poisson
chr19	39	40	61707364	-	2	JAHKSD010000027.1	4899698	4899699	4903230	0	0	0	0	1	0	0	0	0	HPRC_PLUS	male	3140		EUR	PGP - Ashkenazim Jewish	HG002	HG002 2 JAHKSD010000027.1	1242	0.616	0.69	0.805	0.505	FALSE	143	Chromosome end	Chromosome end or Poisson
chr19	12174	12175	61707364	+	2	JAHKSD010000042.1	0	1	56714970	0	0	0	0	1	0	0	0	0	HPRC_PLUS	male	3140		EUR	PGP - Ashkenazim Jewish	HG002	HG002 2 JAHKSD010000042.1	1243	0.616	0.688	0.805	0.664	FALSE	145	Chromosome end	Chromosome end or Poisson
chr19	28156249	28156250	61707364	+	2	JAHKSD010000334.1	180410	180411	239716	0	0	0	0	1	0	0	0	0	HPRC_PLUS	male	3140		EUR	PGP - Ashkenazim Jewish	HG002	HG002 2 JAHKSD010000334.1	1244	0.496	0.517	0.407	0.612	FALSE	9	Alpha	Satellite
chr19	28188132	28188133	61707364	+	2	JAHKSD010000334.1	212300	212301	239716	0	0	0	0	1	0	0	0	0	HPRC_PLUS	male	3140		EUR	PGP - Ashkenazim Jewish	HG002	HG002 2 JAHKSD010000334.1	1245	0.498	0.516	0.407	0.611	FALSE	5	Alpha	Satellite
chr19	57212422	57212423	61707364	+	2	JAHKSD010000133.1	4642	4643	708329	0	0	0	0	1	0	0	0	0	HPRC_PLUS	male	3140		EUR	PGP - Ashkenazim Jewish	HG002	HG002 2 JAHKSD010000133.1	1246	0.605	0.967	0.744	0.515	FALSE	38	High GA/TC (80%)	High GA/TC (80%)
chr19	57213561	57213562	61707364	+	2	JAHKSD010000042.1	56714956	56714957	56714970	0	0	0	0	1	0	0	0	0	HPRC_PLUS	male	3140		EUR	PGP - Ashkenazim Jewish	HG002	HG002 2 JAHKSD010000042.1	1247	0.605	0.967	0.744	0.515	FALSE	38	High GA/TC (80%)	High GA/TC (80%)
chr19	57870530	57870531	61707364	+	2	JAHKSD010000195.1	15605	15606	59606	0	0	0	0	1	0	0	0	0	HPRC_PLUS	male	3140		EUR	PGP - Ashkenazim Jewish	HG002	HG002 2 JAHKSD010000195.1	1248	0.706	0.609	0.577	0.622	FALSE	6	SD	SD and High GA/TC (80%)
chr19	57890915	57890916	61707364	+	2	JAHKSD010000425.1	0	1	26976	0	0	0	0	1	0	0	0	0	HPRC_PLUS	male	3140		EUR	PGP - Ashkenazim Jewish	HG002	HG002 2 JAHKSD010000425.1	1249	0.696	0.608	0.558	0.676	FALSE	6	other	other
chr19	57892455	57892456	61707364	-	2	JAHKSD010000015.1	947531	947532	947532	0	0	0	0	1	0	0	0	0	HPRC_PLUS	male	3140		EUR	PGP - Ashkenazim Jewish	HG002	HG002 2 JAHKSD010000015.1	1250	0.696	0.608	0.558	0.676	FALSE	6	other	other
chr19	57913120	57913121	61707364	+	2	JAHKSD010000195.1	59605	59606	59606	0	0	0	0	1	0	0	0	0	HPRC_PLUS	male	3140		EUR	PGP - Ashkenazim Jewish	HG002	HG002 2 JAHKSD010000195.1	1251	0.711	0.594	0.584	0.627	FALSE	6	SD	SD and High GA/TC (80%)
chr19	57917342	57917343	61707364	+	2	JAHKSD010000133.1	708328	708329	708329	0	0	0	0	1	0	0	0	0	HPRC_PLUS	male	3140		EUR	PGP - Ashkenazim Jewish	HG002	HG002 2 JAHKSD010000133.1	1252	0.711	0.594	0.584	0.627	FALSE	6	SD	SD and High GA/TC (80%)
chr19	57917512	57917513	61707364	+	2	JAHKSD010000425.1	26975	26976	26976	0	0	0	0	1	0	0	0	0	HPRC_PLUS	male	3140		EUR	PGP - Ashkenazim Jewish	HG002	HG002 2 JAHKSD010000425.1	1253	0.711	0.594	0.584	0.627	FALSE	6	SD	SD and High GA/TC (80%)
chr19	58810969	58810970	61707364	-	2	JAHKSD010000015.1	6	7	947532	0	0	0	0	1	0	0	0	0	HPRC_PLUS	male	3140		EUR	PGP - Ashkenazim Jewish	HG002	HG002 2 JAHKSD010000015.1	1254	0.985	0.886	0.706	0.655	FALSE	192	High GA/TC (80%)	High GA/TC (80%)
chr19	58815958	58815959	61707364	+	2	JAHKSD010000079.1	0	1	2895709	0	0	0	0	1	0	0	0	0	HPRC_PLUS	male	3140		EUR	PGP - Ashkenazim Jewish	HG002	HG002 2 JAHKSD010000079.1	1255	0.985	0.886	0.706	0.655	FALSE	192	High GA/TC (80%)	High GA/TC (80%)
chr19	61702785	61702786	61707364	+	2	JAHKSD010000079.1	2890651	2890652	2895709	0	0	0	0	1	0	0	0	0	HPRC_PLUS	male	3140		EUR	PGP - Ashkenazim Jewish	HG002	HG002 2 JAHKSD010000079.1	1256	0.68	0.562	0.74	0.686	FALSE	96	Chromosome end	Chromosome end or Poisson
chr2	0	1	242696752	+	2	JAHKSD010000031.1	4701	4702	6367673	0	0	0	0	1	0	0	0	0	HPRC_PLUS	male	3140		EUR	PGP - Ashkenazim Jewish	HG002	HG002 2 JAHKSD010000031.1	1257	0.571	0.678	0.804	0.645	FALSE	94	Chromosome end	Chromosome end or Poisson
chr2	6349073	6349074	242696752	+	2	JAHKSD010000040.1	9464	9465	81875417	0	0	0	0	1	0	0	0	0	HPRC_PLUS	male	3140		EUR	PGP - Ashkenazim Jewish	HG002	HG002 2 JAHKSD010000040.1	1258	0.619	0.626	0.477	0.686	FALSE	4	other	other
chr2	6370016	6370017	242696752	+	2	JAHKSD010000031.1	6367672	6367673	6367673	0	0	0	0	1	0	0	0	0	HPRC_PLUS	male	3140		EUR	PGP - Ashkenazim Jewish	HG002	HG002 2 JAHKSD010000031.1	1259	0.569	0.565	0.503	0.708	FALSE	4	other	other
chr2	88192268	88192269	242696752	+	2	JAHKSD010000040.1	81875414	81875415	81875417	0	0	0	0	1	0	0	0	0	HPRC_PLUS	male	3140		EUR	PGP - Ashkenazim Jewish	HG002	HG002 2 JAHKSD010000040.1	1260	0.568	1	0.656	0.658	FALSE	146	High GA/TC (80%)	High GA/TC (80%)
chr2	88193582	88193583	242696752	-	2	JAHKSD010000002.1	1186549	1186550	1186550	0	0	0	0	1	0	0	0	0	HPRC_PLUS	male	3140		EUR	PGP - Ashkenazim Jewish	HG002	HG002 2 JAHKSD010000002.1	1261	0.568	1	0.603	0.658	FALSE	146	High GA/TC (80%)	High GA/TC (80%)
chr2	89048502	89048503	242696752	-	2	JAHKSD010000207.1	25212	25213	25213	0	0	0	0	1	0	0	0	0	HPRC_PLUS	male	3140		EUR	PGP - Ashkenazim Jewish	HG002	HG002 2 JAHKSD010000207.1	1262	0.583	0.577	0.505	0.709	FALSE	107	SD	SD and High GA/TC (80%)
chr2	89073708	89073709	242696752	-	2	JAHKSD010000207.1	0	1	25213	0	0	0	0	1	0	0	0	0	HPRC_PLUS	male	3140		EUR	PGP - Ashkenazim Jewish	HG002	HG002 2 JAHKSD010000207.1	1263	0.625	0.656	0.5	0.699	FALSE	94	SD	SD and High GA/TC (80%)
chr2	89663692	89663693	242696752	-	2	JAHKSD010000263.1	128197	128198	128198	0	0	0	0	1	0	0	0	0	HPRC_PLUS	male	3140		EUR	PGP - Ashkenazim Jewish	HG002	HG002 2 JAHKSD010000263.1	1264	0.723	0.587	0.729	0.689	FALSE	27	SD	SD and High GA/TC (80%)
chr2	89682979	89682980	242696752	-	2	JAHKSD010000002.1	0	1	1186550	0	0	0	0	1	0	0	0	0	HPRC_PLUS	male	3140		EUR	PGP - Ashkenazim Jewish	HG002	HG002 2 JAHKSD010000002.1	1265	0.763	0.719	0.701	0.729	FALSE	30	SD	SD and High GA/TC (80%)
chr2	89776344	89776345	242696752	+	2	JAHKSD010000145.1	0	1	4673716	0	0	0	0	1	0	0	0	0	HPRC_PLUS	male	3140		EUR	PGP - Ashkenazim Jewish	HG002	HG002 2 JAHKSD010000145.1	1266	0.728	0.602	0.715	0.672	FALSE	61	SD	SD and High GA/TC (80%)
chr2	89793044	89793045	242696752	-	2	JAHKSD010000263.1	0	1	128198	0	0	0	0	1	0	0	0	0	HPRC_PLUS	male	3140		EUR	PGP - Ashkenazim Jewish	HG002	HG002 2 JAHKSD010000263.1	1267	0.728	0.758	0.715	0.758	FALSE	65	SD	SD and High GA/TC (80%)
chr2	94754012	94754013	242696752	-	2	JAHKSD010000371.1	148748	148749	148749	0	0	0	0	1	0	0	0	0	HPRC_PLUS	male	3140		EUR	PGP - Ashkenazim Jewish	HG002	HG002 2 JAHKSD010000371.1	1268	0.624	0.603	0.475	0.717	FALSE	107	SD	SD and High GA/TC (80%)
chr2	94759886	94759887	242696752	-	2	JAHKSD010000352.1	137308	137309	137309	0	0	0	0	1	0	0	0	0	HPRC_PLUS	male	3140		EUR	PGP - Ashkenazim Jewish	HG002	HG002 2 JAHKSD010000352.1	1269	0.624	0.603	0.5	0.717	FALSE	113	SD	SD and High GA/TC (80%)
chr2	94777211	94777212	242696752	+	2	JAHKSD010000145.1	4673715	4673716	4673716	0	0	0	0	1	0	0	0	0	HPRC_PLUS	male	3140		EUR	PGP - Ashkenazim Jewish	HG002	HG002 2 JAHKSD010000145.1	1270	0.667	0.596	0.583	0.711	FALSE	132	SD	SD and High GA/TC (80%)
chr2	94896823	94896824	242696752	-	2	JAHKSD010000352.1	0	1	137309	0	0	0	0	1	0	0	0	0	HPRC_PLUS	male	3140		EUR	PGP - Ashkenazim Jewish	HG002	HG002 2 JAHKSD010000352.1	1271	0.762	0.586	0.529	0.754	FALSE	185	SD	SD and High GA/TC (80%)
chr2	94902408	94902409	242696752	-	2	JAHKSD010000371.1	0	1	148749	0	0	0	0	1	0	0	0	0	HPRC_PLUS	male	3140		EUR	PGP - Ashkenazim Jewish	HG002	HG002 2 JAHKSD010000371.1	1272	0.762	0.611	0.514	0.754	FALSE	181	SD	SD and High GA/TC (80%)
chr2	94923013	94923014	242696752	-	2	JAHKSD010000082.1	36105308	36105309	36105309	0	0	0	0	1	0	0	0	0	HPRC_PLUS	male	3140		EUR	PGP - Ashkenazim Jewish	HG002	HG002 2 JAHKSD010000082.1	1273	0.592	0.708	0.671	0.688	FALSE	154	SD	SD and High GA/TC (80%)
chr2	131019633	131019634	242696752	-	2	JAHKSD010000082.1	0	1	36105309	0	0	0	0	1	0	0	0	0	HPRC_PLUS	male	3140		EUR	PGP - Ashkenazim Jewish	HG002	HG002 2 JAHKSD010000082.1	1274	0.582	0.611	0.614	0.615	FALSE	111	SD	SD and High GA/TC (80%)
chr2	131020285	131020286	242696752	-	2	JAHKSD010000004.1	111658245	111658246	111658246	0	0	0	0	1	0	0	0	0	HPRC_PLUS	male	3140		EUR	PGP - Ashkenazim Jewish	HG002	HG002 2 JAHKSD010000004.1	1275	0.582	0.611	0.614	0.615	FALSE	111	SD	SD and High GA/TC (80%)
chr2	242696751	242696752	242696752	-	2	JAHKSD010000004.1	2358	2359	111658246	0	0	0	0	1	0	0	0	0	HPRC_PLUS	male	3140		EUR	PGP - Ashkenazim Jewish	HG002	HG002 2 JAHKSD010000004.1	1276	0.685	0.64	0.83	0.672	FALSE	101	Chromosome end	Chromosome end or Poisson
chr20	13646	13647	66210255	-	2	JAHKSD010000055.1	64846718	64846719	64846719	0	0	0	0	1	0	0	0	0	HPRC_PLUS	male	3140		EUR	PGP - Ashkenazim Jewish	HG002	HG002 2 JAHKSD010000055.1	1277	0.583	0.607	0.753	0.693	FALSE	85	Chromosome end	Chromosome end or Poisson
chr20	26099491	26099492	66210255	-	2	JAHKSD010000298.1	26283	26284	26284	0	0	0	0	1	0	0	0	0	HPRC_PLUS	male	3140		EUR	PGP - Ashkenazim Jewish	HG002	HG002 2 JAHKSD010000298.1	1278	0.643	0.6	0.573	0.724	FALSE	18	SD	SD and High GA/TC (80%)
chr20	26125782	26125783	66210255	-	2	JAHKSD010000298.1	0	1	26284	0	0	0	0	1	0	0	0	0	HPRC_PLUS	male	3140		EUR	PGP - Ashkenazim Jewish	HG002	HG002 2 JAHKSD010000298.1	1279	0.611	0.586	0.492	0.697	FALSE	18	SD	SD and High GA/TC (80%)
chr20	64903533	64903534	66210255	-	2	JAHKSD010000055.1	0	1	64846719	0	0	0	0	1	0	0	0	0	HPRC_PLUS	male	3140		EUR	PGP - Ashkenazim Jewish	HG002	HG002 2 JAHKSD010000055.1	1280	0.775	0.886	0.732	0.685	FALSE	196	High GA/TC (80%)	High GA/TC (80%)
chr20	64904243	64904244	66210255	+	2	JAHKSD010000009.1	0	1	1212238	0	0	0	0	1	0	0	0	0	HPRC_PLUS	male	3140		EUR	PGP - Ashkenazim Jewish	HG002	HG002 2 JAHKSD010000009.1	1281	0.775	0.886	0.732	0.685	FALSE	196	High GA/TC (80%)	High GA/TC (80%)
chr20	66107855	66107856	66210255	+	2	JAHKSD010000009.1	1205195	1205196	1212238	0	0	0	0	1	0	0	0	0	HPRC_PLUS	male	3140		EUR	PGP - Ashkenazim Jewish	HG002	HG002 2 JAHKSD010000009.1	1282	0.642	0.622	0.676	0.728	FALSE	121	Chromosome end	Chromosome end or Poisson
chr20	66197950	66197951	66210255	-	2	JAHKSD010000018.1	0	1	26674281	0	0	0	0	1	0	0	0	0	HPRC_PLUS	male	3140		EUR	PGP - Ashkenazim Jewish	HG002	HG002 2 JAHKSD010000018.1	1283	0.696	0.578	0.752	0.669	FALSE	142	Chromosome end	Chromosome end or Poisson
chr21	262710	262711	45090682	-	2	JAHKSD010000099.1	2033060	2033061	2033061	100	100	100	1	0	0	0	0	0	HPRC_PLUS	male	3140		EUR	PGP - Ashkenazim Jewish	HG002	HG002 2 JAHKSD010000099.1	1284	0.624	0.581	0.477	0.735	TRUE	20	SD	SD and High GA/TC (80%)
chr21	3741908	3741909	45090682	+	2	JAHKSD010000081.1	0	1	174137	0	0	0	0	1	0	0	0	0	HPRC_PLUS	male	3140		EUR	PGP - Ashkenazim Jewish	HG002	HG002 2 JAHKSD010000081.1	1285	0.587	0.812	0.841	0.586	TRUE	84	SD and High GA/TC (80%)	SD and High GA/TC (80%)
chr21	3770211	3770212	45090682	-	2	JAHKSD010000019.1	292240	292241	292241	0	0	0	0	1	0	0	0	0	HPRC_PLUS	male	3140		EUR	PGP - Ashkenazim Jewish	HG002	HG002 2 JAHKSD010000019.1	1286	0.585	0.882	0.606	0.624	TRUE	131	SD and High GA/TC (80%)	SD and High GA/TC (80%)
chr21	3847974	3847975	45090682	-	2	JAHKSD010000084.1	228121	228122	228122	0	0	0	0	1	0	0	0	0	HPRC_PLUS	male	3140		EUR	PGP - Ashkenazim Jewish	HG002	HG002 2 JAHKSD010000084.1	1287	0.553	0.885	0.811	0.547	TRUE	221	SD and High GA/TC (80%)	SD and High GA/TC (80%)
chr21	3918061	3918062	45090682	+	2	JAHKSD010000081.1	174136	174137	174137	0	0	0	0	1	0	0	0	0	HPRC_PLUS	male	3140		EUR	PGP - Ashkenazim Jewish	HG002	HG002 2 JAHKSD010000081.1	1288	0.596	0.806	0.844	0.588	TRUE	230	SD and High GA/TC (80%)	SD and High GA/TC (80%)
chr21	3949136	3949137	45090682	-	2	JAHKSD010000420.1	42599	42600	42600	0	0	0	0	1	0	0	0	0	HPRC_PLUS	male	3140		EUR	PGP - Ashkenazim Jewish	HG002	HG002 2 JAHKSD010000420.1	1289	0.595	0.881	0.603	0.625	TRUE	226	SD and High GA/TC (80%)	SD and High GA/TC (80%)
chr21	3974046	3974047	45090682	-	2	JAHKSD010000362.1	68467	68468	68468	0	0	0	0	1	0	0	0	0	HPRC_PLUS	male	3140		EUR	PGP - Ashkenazim Jewish	HG002	HG002 2 JAHKSD010000362.1	1290	0.558	0.781	0.844	0.538	TRUE	202	SD	SD and High GA/TC (80%)
chr21	3991767	3991768	45090682	-	2	JAHKSD010000420.1	0	1	42600	0	0	0	0	1	0	0	0	0	HPRC_PLUS	male	3140		EUR	PGP - Ashkenazim Jewish	HG002	HG002 2 JAHKSD010000420.1	1291	0.555	0.882	0.603	0.626	TRUE	183	SD and High GA/TC (80%)	SD and High GA/TC (80%)
chr21	4042412	4042413	45090682	-	2	JAHKSD010000362.1	0	1	68468	0	0	0	0	1	0	0	0	0	HPRC_PLUS	male	3140		EUR	PGP - Ashkenazim Jewish	HG002	HG002 2 JAHKSD010000362.1	1292	0.587	0.883	0.776	0.625	TRUE	140	SD and High GA/TC (80%)	SD and High GA/TC (80%)
chr21	4064426	4064427	45090682	-	2	JAHKSD010000019.1	0	1	292241	0	0	0	0	1	0	0	0	0	HPRC_PLUS	male	3140		EUR	PGP - Ashkenazim Jewish	HG002	HG002 2 JAHKSD010000019.1	1293	0.557	0.88	0.839	0.551	TRUE	137	SD and High GA/TC (80%)	SD and High GA/TC (80%)
chr21	4075120	4075121	45090682	-	2	JAHKSD010000084.1	0	1	228122	0	0	0	0	1	0	0	0	0	HPRC_PLUS	male	3140		EUR	PGP - Ashkenazim Jewish	HG002	HG002 2 JAHKSD010000084.1	1294	0.535	0.881	0.682	0.623	TRUE	130	SD and High GA/TC (80%)	SD and High GA/TC (80%)
chr21	4078873	4078874	45090682	+	2	JAHKSD010000257.1	0	1	39304	0	0	0	0	1	0	0	0	0	HPRC_PLUS	male	3140		EUR	PGP - Ashkenazim Jewish	HG002	HG002 2 JAHKSD010000257.1	1295	0.535	0.881	0.607	0.623	TRUE	127	SD and High GA/TC (80%)	SD and High GA/TC (80%)
chr21	4118208	4118209	45090682	+	2	JAHKSD010000257.1	39297	39298	39304	0	0	0	0	1	0	0	0	0	HPRC_PLUS	male	3140		EUR	PGP - Ashkenazim Jewish	HG002	HG002 2 JAHKSD010000257.1	1296	0.538	0.88	0.783	0.546	TRUE	140	SD and High GA/TC (80%)	SD and High GA/TC (80%)
chr21	4427732	4427733	45090682	-	2	JAHKSD010000254.1	52943	52944	52944	0	0	0	0	1	0	0	0	0	HPRC_PLUS	male	3140		EUR	PGP - Ashkenazim Jewish	HG002	HG002 2 JAHKSD010000254.1	1297	0.54	0.88	0.783	0.545	TRUE	112	SD and High GA/TC (80%)	SD and High GA/TC (80%)
chr21	4469459	4469460	45090682	+	2	JAHKSD010000138.1	0	1	33604	0	0	0	0	1	0	0	0	0	HPRC_PLUS	male	3140		EUR	PGP - Ashkenazim Jewish	HG002	HG002 2 JAHKSD010000138.1	1298	0.558	0.881	0.814	0.545	TRUE	122	SD and High GA/TC (80%)	SD and High GA/TC (80%)
chr21	4480719	4480720	45090682	-	2	JAHKSD010000254.1	0	1	52944	0	0	0	0	1	0	0	0	0	HPRC_PLUS	male	3140		EUR	PGP - Ashkenazim Jewish	HG002	HG002 2 JAHKSD010000254.1	1299	0.596	0.881	0.611	0.626	TRUE	125	SD and High GA/TC (80%)	SD and High GA/TC (80%)
chr21	4503037	4503038	45090682	+	2	JAHKSD010000138.1	33601	33602	33604	0	0	0	0	1	0	0	0	0	HPRC_PLUS	male	3140		EUR	PGP - Ashkenazim Jewish	HG002	HG002 2 JAHKSD010000138.1	1300	0.551	0.777	0.844	0.582	TRUE	124	SD	SD and High GA/TC (80%)
chr21	4591287	4591288	45090682	-	2	JAHKSD010000434.1	30974	30975	30975	0	0	0	0	1	0	0	0	0	HPRC_PLUS	male	3140		EUR	PGP - Ashkenazim Jewish	HG002	HG002 2 JAHKSD010000434.1	1301	0.558	0.808	0.843	0.585	TRUE	122	SD and High GA/TC (80%)	SD and High GA/TC (80%)
chr21	4622206	4622207	45090682	-	2	JAHKSD010000434.1	0	1	30975	0	0	0	0	1	0	0	0	0	HPRC_PLUS	male	3140		EUR	PGP - Ashkenazim Jewish	HG002	HG002 2 JAHKSD010000434.1	1302	0.588	0.875	0.842	0.625	TRUE	122	SD and High GA/TC (80%)	SD and High GA/TC (80%)
chr21	4664806	4664807	45090682	+	2	JAHKSD010000118.1	0	1	83576	0	0	0	0	1	0	0	0	0	HPRC_PLUS	male	3140		EUR	PGP - Ashkenazim Jewish	HG002	HG002 2 JAHKSD010000118.1	1303	0.583	0.881	0.84	0.625	TRUE	125	SD and High GA/TC (80%)	SD and High GA/TC (80%)
chr21	4748990	4748991	45090682	+	2	JAHKSD010000118.1	83575	83576	83576	0	0	0	0	1	0	0	0	0	HPRC_PLUS	male	3140		EUR	PGP - Ashkenazim Jewish	HG002	HG002 2 JAHKSD010000118.1	1304	0.596	0.881	0.609	0.628	TRUE	125	SD and High GA/TC (80%)	SD and High GA/TC (80%)
chr21	4836368	4836369	45090682	-	2	JAHKSD010000076.1	210171	210172	210172	0	0	0	0	1	0	0	0	0	HPRC_PLUS	male	3140		EUR	PGP - Ashkenazim Jewish	HG002	HG002 2 JAHKSD010000076.1	1305	0.595	0.881	0.603	0.625	TRUE	132	SD and High GA/TC (80%)	SD and High GA/TC (80%)
chr21	4862391	4862392	45090682	+	2	JAHKSD010000377.1	0	1	37371	0	0	0	0	1	0	0	0	0	HPRC_PLUS	male	3140		EUR	PGP - Ashkenazim Jewish	HG002	HG002 2 JAHKSD010000377.1	1306	0.558	0.877	0.844	0.548	TRUE	128	SD and High GA/TC (80%)	SD and High GA/TC (80%)
chr21	4899774	4899775	45090682	+	2	JAHKSD010000377.1	37370	37371	37371	0	0	0	0	1	0	0	0	0	HPRC_PLUS	male	3140		EUR	PGP - Ashkenazim Jewish	HG002	HG002 2 JAHKSD010000377.1	1307	0.591	0.807	0.842	0.585	TRUE	128	SD and High GA/TC (80%)	SD and High GA/TC (80%)
chr21	4916454	4916455	45090682	-	2	JAHKSD010000282.1	92066	92067	92067	0	0	0	0	1	0	0	0	0	HPRC_PLUS	male	3140		EUR	PGP - Ashkenazim Jewish	HG002	HG002 2 JAHKSD010000282.1	1308	0.537	0.883	0.782	0.55	TRUE	128	SD and High GA/TC (80%)	SD and High GA/TC (80%)
chr21	4937760	4937761	45090682	+	2	JAHKSD010000278.1	0	1	39429	0	0	0	0	1	0	0	0	0	HPRC_PLUS	male	3140		EUR	PGP - Ashkenazim Jewish	HG002	HG002 2 JAHKSD010000278.1	1309	0.587	0.81	0.842	0.625	TRUE	126	SD and High GA/TC (80%)	SD and High GA/TC (80%)
chr21	4951137	4951138	45090682	-	2	JAHKSD010000132.1	47635	47636	47636	0	0	0	0	1	0	0	0	0	HPRC_PLUS	male	3140		EUR	PGP - Ashkenazim Jewish	HG002	HG002 2 JAHKSD010000132.1	1310	0.557	0.877	0.842	0.551	TRUE	128	SD and High GA/TC (80%)	SD and High GA/TC (80%)
chr21	4977170	4977171	45090682	+	2	JAHKSD010000278.1	39428	39429	39429	0	0	0	0	1	0	0	0	0	HPRC_PLUS	male	3140		EUR	PGP - Ashkenazim Jewish	HG002	HG002 2 JAHKSD010000278.1	1311	0.586	0.874	0.842	0.623	TRUE	128	SD and High GA/TC (80%)	SD and High GA/TC (80%)
chr21	4997733	4997734	45090682	-	2	JAHKSD010000268.1	56367	56368	56368	0	0	0	0	1	0	0	0	0	HPRC_PLUS	male	3140		EUR	PGP - Ashkenazim Jewish	HG002	HG002 2 JAHKSD010000268.1	1312	0.556	0.88	0.837	0.546	TRUE	131	SD and High GA/TC (80%)	SD and High GA/TC (80%)
chr21	4998748	4998749	45090682	-	2	JAHKSD010000132.1	0	1	47636	0	0	0	0	1	0	0	0	0	HPRC_PLUS	male	3140		EUR	PGP - Ashkenazim Jewish	HG002	HG002 2 JAHKSD010000132.1	1313	0.556	0.88	0.837	0.546	TRUE	132	SD and High GA/TC (80%)	SD and High GA/TC (80%)
chr21	5008593	5008594	45090682	-	2	JAHKSD010000282.1	0	1	92067	0	0	0	0	1	0	0	0	0	HPRC_PLUS	male	3140		EUR	PGP - Ashkenazim Jewish	HG002	HG002 2 JAHKSD010000282.1	1314	0.538	0.88	0.609	0.626	TRUE	132	SD and High GA/TC (80%)	SD and High GA/TC (80%)
chr21	5046716	5046717	45090682	-	2	JAHKSD010000076.1	54	55	210172	0	0	0	0	1	0	0	0	0	HPRC_PLUS	male	3140		EUR	PGP - Ashkenazim Jewish	HG002	HG002 2 JAHKSD010000076.1	1315	0.559	0.881	0.814	0.543	TRUE	125	SD and High GA/TC (80%)	SD and High GA/TC (80%)
chr21	5047034	5047035	45090682	+	2	JAHKSD010000379.1	0	1	44364	0	0	0	0	1	0	0	0	0	HPRC_PLUS	male	3140		EUR	PGP - Ashkenazim Jewish	HG002	HG002 2 JAHKSD010000379.1	1316	0.559	0.881	0.798	0.543	TRUE	125	SD and High GA/TC (80%)	SD and High GA/TC (80%)
chr21	5053953	5053954	45090682	-	2	JAHKSD010000268.1	0	1	56368	0	0	0	0	1	0	0	0	0	HPRC_PLUS	male	3140		EUR	PGP - Ashkenazim Jewish	HG002	HG002 2 JAHKSD010000268.1	1317	0.547	0.881	0.609	0.626	TRUE	125	SD and High GA/TC (80%)	SD and High GA/TC (80%)
chr21	5091419	5091420	45090682	+	2	JAHKSD010000379.1	44363	44364	44364	0	0	0	0	1	0	0	0	0	HPRC_PLUS	male	3140		EUR	PGP - Ashkenazim Jewish	HG002	HG002 2 JAHKSD010000379.1	1318	0.552	0.881	0.801	0.546	TRUE	120	SD and High GA/TC (80%)	SD and High GA/TC (80%)
chr21	5315577	5315578	45090682	+	2	JAHKSD010000098.1	0	1	44046	0	0	0	0	1	0	0	0	0	HPRC_PLUS	male	3140		EUR	PGP - Ashkenazim Jewish	HG002	HG002 2 JAHKSD010000098.1	1319	0.54	0.88	0.783	0.545	TRUE	138	SD and High GA/TC (80%)	SD and High GA/TC (80%)
chr21	5324638	5324639	45090682	+	2	JAHKSD010000386.1	0	1	59291	0	0	0	0	1	0	0	0	0	HPRC_PLUS	male	3140		EUR	PGP - Ashkenazim Jewish	HG002	HG002 2 JAHKSD010000386.1	1320	0.596	0.88	0.609	0.627	TRUE	143	SD and High GA/TC (80%)	SD and High GA/TC (80%)
chr21	5359547	5359548	45090682	+	2	JAHKSD010000098.1	44045	44046	44046	0	0	0	0	1	0	0	0	0	HPRC_PLUS	male	3140		EUR	PGP - Ashkenazim Jewish	HG002	HG002 2 JAHKSD010000098.1	1321	0.55	0.881	0.799	0.545	TRUE	183	SD and High GA/TC (80%)	SD and High GA/TC (80%)
chr21	5383987	5383988	45090682	+	2	JAHKSD010000386.1	59290	59291	59291	0	0	0	0	1	0	0	0	0	HPRC_PLUS	male	3140		EUR	PGP - Ashkenazim Jewish	HG002	HG002 2 JAHKSD010000386.1	1322	0.596	0.805	0.844	0.583	TRUE	235	SD and High GA/TC (80%)	SD and High GA/TC (80%)
chr21	5389595	5389596	45090682	+	2	JAHKSD010000083.1	0	1	29524	0	0	0	0	1	0	0	0	0	HPRC_PLUS	male	3140		EUR	PGP - Ashkenazim Jewish	HG002	HG002 2 JAHKSD010000083.1	1323	0.551	0.805	0.844	0.583	TRUE	253	SD and High GA/TC (80%)	SD and High GA/TC (80%)
chr21	5413080	5413081	45090682	+	2	JAHKSD010000276.1	2	3	143371	0	0	0	0	1	0	0	0	0	HPRC_PLUS	male	3140		EUR	PGP - Ashkenazim Jewish	HG002	HG002 2 JAHKSD010000276.1	1324	0.594	0.881	0.603	0.626	TRUE	333	SD and High GA/TC (80%)	SD and High GA/TC (80%)
chr21	5419045	5419046	45090682	+	2	JAHKSD010000083.1	29523	29524	29524	0	0	0	0	1	0	0	0	0	HPRC_PLUS	male	3140		EUR	PGP - Ashkenazim Jewish	HG002	HG002 2 JAHKSD010000083.1	1325	0.594	0.881	0.809	0.626	TRUE	361	SD and High GA/TC (80%)	SD and High GA/TC (80%)
chr21	5438763	5438764	45090682	+	2	JAHKSD010000396.1	0	1	46767	0	0	0	0	1	0	0	0	0	HPRC_PLUS	male	3140		EUR	PGP - Ashkenazim Jewish	HG002	HG002 2 JAHKSD010000396.1	1326	0.556	0.781	0.843	0.537	TRUE	500	SD	SD and High GA/TC (80%)
chr21	5445275	5445276	45090682	+	2	JAHKSD010000203.1	0	1	143141	0	0	0	0	1	0	0	0	0	HPRC_PLUS	male	3140		EUR	PGP - Ashkenazim Jewish	HG002	HG002 2 JAHKSD010000203.1	1327	0.556	0.882	0.81	0.547	TRUE	539	SD and High GA/TC (80%)	SD and High GA/TC (80%)
chr21	5445781	5445782	45090682	-	2	JAHKSD010000116.1	109129	109130	109130	0	0	0	0	1	0	0	0	0	HPRC_PLUS	male	3140		EUR	PGP - Ashkenazim Jewish	HG002	HG002 2 JAHKSD010000116.1	1328	0.556	0.882	0.81	0.547	TRUE	548	SD and High GA/TC (80%)	SD and High GA/TC (80%)
chr21	5455242	5455243	45090682	+	2	JAHKSD010000166.1	0	1	117873	0	0	0	0	1	0	0	0	0	HPRC_PLUS	male	3140		EUR	PGP - Ashkenazim Jewish	HG002	HG002 2 JAHKSD010000166.1	1329	0.543	0.882	0.608	0.625	TRUE	626	SD and High GA/TC (80%)	SD and High GA/TC (80%)
chr21	5485663	5485664	45090682	+	2	JAHKSD010000396.1	46766	46767	46767	0	0	0	0	1	0	0	0	0	HPRC_PLUS	male	3140		EUR	PGP - Ashkenazim Jewish	HG002	HG002 2 JAHKSD010000396.1	1330	0.558	0.88	0.836	0.55	TRUE	820	SD and High GA/TC (80%)	SD and High GA/TC (80%)
chr21	5485747	5485748	45090682	-	2	JAHKSD010000057.1	42706	42707	42707	0	0	0	0	1	0	0	0	0	HPRC_PLUS	male	3140		EUR	PGP - Ashkenazim Jewish	HG002	HG002 2 JAHKSD010000057.1	1331	0.558	0.88	0.836	0.55	TRUE	820	SD and High GA/TC (80%)	SD and High GA/TC (80%)
chr21	5506218	5506219	45090682	-	2	JAHKSD010000258.1	71015	71016	71016	0	0	0	0	1	0	0	0	0	HPRC_PLUS	male	3140		EUR	PGP - Ashkenazim Jewish	HG002	HG002 2 JAHKSD010000258.1	1332	0.588	0.882	0.775	0.625	TRUE	825	SD and High GA/TC (80%)	SD and High GA/TC (80%)
chr21	5528381	5528382	45090682	-	2	JAHKSD010000057.1	0	1	42707	0	0	0	0	1	0	0	0	0	HPRC_PLUS	male	3140		EUR	PGP - Ashkenazim Jewish	HG002	HG002 2 JAHKSD010000057.1	1333	0.555	0.885	0.842	0.546	TRUE	810	SD and High GA/TC (80%)	SD and High GA/TC (80%)
chr21	5546649	5546650	45090682	+	2	JAHKSD010000399.1	0	1	33009	0	0	0	0	1	0	0	0	0	HPRC_PLUS	male	3140		EUR	PGP - Ashkenazim Jewish	HG002	HG002 2 JAHKSD010000399.1	1334	0.597	0.885	0.604	0.627	TRUE	787	SD and High GA/TC (80%)	SD and High GA/TC (80%)
chr21	5547066	5547067	45090682	-	2	JAHKSD010000104.1	32015	32016	32060	0	0	0	0	1	0	0	0	0	HPRC_PLUS	male	3140		EUR	PGP - Ashkenazim Jewish	HG002	HG002 2 JAHKSD010000104.1	1335	0.597	0.885	0.604	0.627	TRUE	786	SD and High GA/TC (80%)	SD and High GA/TC (80%)
chr21	5549101	5549102	45090682	-	2	JAHKSD010000297.1	32245	32246	32246	0	0	0	0	1	0	0	0	0	HPRC_PLUS	male	3140		EUR	PGP - Ashkenazim Jewish	HG002	HG002 2 JAHKSD010000297.1	1336	0.597	0.881	0.767	0.627	TRUE	783	SD and High GA/TC (80%)	SD and High GA/TC (80%)
chr21	5553933	5553934	45090682	-	2	JAHKSD010000249.1	27487	27488	27554	0	0	0	0	1	0	0	0	0	HPRC_PLUS	male	3140		EUR	PGP - Ashkenazim Jewish	HG002	HG002 2 JAHKSD010000249.1	1337	0.597	0.872	0.843	0.627	TRUE	779	SD and High GA/TC (80%)	SD and High GA/TC (80%)
chr21	5554780	5554781	45090682	-	2	JAHKSD010000116.1	0	1	109130	0	0	0	0	1	0	0	0	0	HPRC_PLUS	male	3140		EUR	PGP - Ashkenazim Jewish	HG002	HG002 2 JAHKSD010000116.1	1338	0.597	0.851	0.843	0.627	TRUE	775	SD and High GA/TC (80%)	SD and High GA/TC (80%)
chr21	5556386	5556387	45090682	+	2	JAHKSD010000276.1	143370	143371	143371	0	0	0	0	1	0	0	0	0	HPRC_PLUS	male	3140		EUR	PGP - Ashkenazim Jewish	HG002	HG002 2 JAHKSD010000276.1	1339	0.597	0.851	0.843	0.627	TRUE	772	SD and High GA/TC (80%)	SD and High GA/TC (80%)
chr21	5572299	5572300	45090682	+	2	JAHKSD010000166.1	117872	117873	117873	0	0	0	0	1	0	0	0	0	HPRC_PLUS	male	3140		EUR	PGP - Ashkenazim Jewish	HG002	HG002 2 JAHKSD010000166.1	1340	0.559	0.883	0.843	0.541	TRUE	736	SD and High GA/TC (80%)	SD and High GA/TC (80%)
chr21	5578154	5578155	45090682	-	2	JAHKSD010000258.1	0	1	71016	0	0	0	0	1	0	0	0	0	HPRC_PLUS	male	3140		EUR	PGP - Ashkenazim Jewish	HG002	HG002 2 JAHKSD010000258.1	1341	0.559	0.883	0.807	0.546	TRUE	729	SD and High GA/TC (80%)	SD and High GA/TC (80%)
chr21	5579046	5579047	45090682	-	2	JAHKSD010000104.1	0	1	32060	0	0	0	0	1	0	0	0	0	HPRC_PLUS	male	3140		EUR	PGP - Ashkenazim Jewish	HG002	HG002 2 JAHKSD010000104.1	1342	0.559	0.883	0.807	0.546	TRUE	725	SD and High GA/TC (80%)	SD and High GA/TC (80%)
chr21	5579595	5579596	45090682	+	2	JAHKSD010000399.1	33008	33009	33009	0	0	0	0	1	0	0	0	0	HPRC_PLUS	male	3140		EUR	PGP - Ashkenazim Jewish	HG002	HG002 2 JAHKSD010000399.1	1343	0.559	0.883	0.799	0.546	TRUE	724	SD and High GA/TC (80%)	SD and High GA/TC (80%)
chr21	5581302	5581303	45090682	-	2	JAHKSD010000297.1	0	1	32246	0	0	0	0	1	0	0	0	0	HPRC_PLUS	male	3140		EUR	PGP - Ashkenazim Jewish	HG002	HG002 2 JAHKSD010000297.1	1344	0.538	0.883	0.784	0.546	TRUE	716	SD and High GA/TC (80%)	SD and High GA/TC (80%)
chr21	5581398	5581399	45090682	-	2	JAHKSD010000249.1	0	1	27554	0	0	0	0	1	0	0	0	0	HPRC_PLUS	male	3140		EUR	PGP - Ashkenazim Jewish	HG002	HG002 2 JAHKSD010000249.1	1345	0.538	0.883	0.784	0.546	TRUE	716	SD and High GA/TC (80%)	SD and High GA/TC (80%)
chr21	5586169	5586170	45090682	+	2	JAHKSD010000203.1	143126	143127	143141	0	0	0	0	1	0	0	0	0	HPRC_PLUS	male	3140		EUR	PGP - Ashkenazim Jewish	HG002	HG002 2 JAHKSD010000203.1	1346	0.538	0.883	0.607	0.546	TRUE	699	SD and High GA/TC (80%)	SD and High GA/TC (80%)
chr21	9813681	9813682	45090682	+	2	JAHKSD010000164.1	0	1	1296141	0	0	0	0	1	0	0	0	0	HPRC_PLUS	male	3140		EUR	PGP - Ashkenazim Jewish	HG002	HG002 2 JAHKSD010000164.1	1347	0.615	0.613	0.716	0.703	TRUE	10	SD	SD and High GA/TC (80%)
chr21	10237286	10237287	45090682	+	2	JAHKSD010000378.1	0	1	27652	0	0	0	0	1	0	0	0	0	HPRC_PLUS	male	3140		EUR	PGP - Ashkenazim Jewish	HG002	HG002 2 JAHKSD010000378.1	1348	0.269	0.781	0.483	0.557	TRUE	13	SD	SD and High GA/TC (80%)
chr21	10264952	10264953	45090682	+	2	JAHKSD010000378.1	27651	27652	27652	0	0	0	0	1	0	0	0	0	HPRC_PLUS	male	3140		EUR	PGP - Ashkenazim Jewish	HG002	HG002 2 JAHKSD010000378.1	1349	0.268	0.783	0.486	0.559	TRUE	13	SD	SD and High GA/TC (80%)
chr21	10970375	10970376	45090682	+	2	JAHKSD010000059.1	4	5	34173178	0	0	0	0	1	0	0	0	0	HPRC_PLUS	male	3140		EUR	PGP - Ashkenazim Jewish	HG002	HG002 2 JAHKSD010000059.1	1350	0.551	0.534	0.399	0.799	TRUE	258	Alpha	Satellite
chr21	11009359	11009360	45090682	-	2	JAHKSD010000171.1	509454	509455	509961	0	0	0	0	1	0	0	0	0	HPRC_PLUS	male	3140		EUR	PGP - Ashkenazim Jewish	HG002	HG002 2 JAHKSD010000171.1	1351	0.494	0.532	0.398	0.626	TRUE	322	Alpha	Satellite
chr21	11033432	11033433	45090682	-	2	JAHKSD010000171.1	0	1	509961	0	0	0	0	1	0	0	0	0	HPRC_PLUS	male	3140		EUR	PGP - Ashkenazim Jewish	HG002	HG002 2 JAHKSD010000171.1	1352	0.496	0.533	0.4	0.626	TRUE	367	Alpha	Satellite
chr21	11091972	11091973	45090682	+	2	JAHKSD010000361.1	0	1	63893	0	0	0	0	1	0	0	0	0	HPRC_PLUS	male	3140		EUR	PGP - Ashkenazim Jewish	HG002	HG002 2 JAHKSD010000361.1	1353	0.497	0.533	0.401	0.624	TRUE	311	Alpha	Satellite
chr21	11163676	11163677	45090682	+	2	JAHKSD010000361.1	63890	63891	63893	0	0	0	0	1	0	0	0	0	HPRC_PLUS	male	3140		EUR	PGP - Ashkenazim Jewish	HG002	HG002 2 JAHKSD010000361.1	1354	0.491	0.533	0.4	0.622	TRUE	309	Alpha	Satellite
chr21	11202857	11202858	45090682	+	2	JAHKSD010000164.1	1296140	1296141	1296141	0	0	0	0	1	0	0	0	0	HPRC_PLUS	male	3140		EUR	PGP - Ashkenazim Jewish	HG002	HG002 2 JAHKSD010000164.1	1355	0.493	0.532	0.399	0.623	TRUE	296	Alpha	Satellite
chr21	45090681	45090682	45090682	+	2	JAHKSD010000059.1	34170567	34170568	34173178	0	0	0	0	1	0	0	0	0	HPRC_PLUS	male	3140		EUR	PGP - Ashkenazim Jewish	HG002	HG002 2 JAHKSD010000059.1	1356	0.676	0.563	0.733	0.671	FALSE	95	Chromosome end	Chromosome end or Poisson
chr22	4575	4576	51324926	+	2	JAHKSD010000165.1	7971	7972	3601430	0	0	0	0	1	0	0	0	0	HPRC_PLUS	male	3140		EUR	PGP - Ashkenazim Jewish	HG002	HG002 2 JAHKSD010000165.1	1357	0.6	0.694	0.586	0.662	TRUE	160	Chromosome end	Chromosome end or Poisson
chr22	2504268	2504269	51324926	-	2	JAHKSD010000374.1	61876	61877	62299	0	0	0	0	1	0	0	0	0	HPRC_PLUS	male	3140		EUR	PGP - Ashkenazim Jewish	HG002	HG002 2 JAHKSD010000374.1	1358	0.764	0.281	0.424	0.605	TRUE	8	Satellite	Satellite
chr22	2557848	2557849	51324926	-	2	JAHKSD010000374.1	298	299	62299	0	0	0	0	1	0	0	0	0	HPRC_PLUS	male	3140		EUR	PGP - Ashkenazim Jewish	HG002	HG002 2 JAHKSD010000374.1	1359	0.759	0.274	0.428	0.603	TRUE	6	10% Low Complexity	Satellite
chr22	3971051	3971052	51324926	+	2	JAHKSD010000163.1	0	1	387936	0	0	0	0	1	0	0	0	0	HPRC_PLUS	male	3140		EUR	PGP - Ashkenazim Jewish	HG002	HG002 2 JAHKSD010000163.1	1360	0.65	0.551	0.58	0.615	TRUE	43	SD	SD and High GA/TC (80%)
chr22	4678339	4678340	51324926	+	2	JAHKSD010000424.1	0	1	33067	0	0	0	0	1	0	0	0	0	HPRC_PLUS	male	3140		EUR	PGP - Ashkenazim Jewish	HG002	HG002 2 JAHKSD010000424.1	1361	0.609	0.562	0.556	0.714	TRUE	26	SD	SD and High GA/TC (80%)
chr22	4711405	4711406	51324926	+	2	JAHKSD010000424.1	33066	33067	33067	0	0	0	0	1	0	0	0	0	HPRC_PLUS	male	3140		EUR	PGP - Ashkenazim Jewish	HG002	HG002 2 JAHKSD010000424.1	1362	0.57	0.636	0.528	0.727	TRUE	52	SD	SD and High GA/TC (80%)
chr22	4777197	4777198	51324926	+	2	JAHKSD010000279.1	0	1	46709	0	0	0	0	1	0	0	0	0	HPRC_PLUS	male	3140		EUR	PGP - Ashkenazim Jewish	HG002	HG002 2 JAHKSD010000279.1	1363	0.639	0.742	0.521	0.727	TRUE	124	SD	SD and High GA/TC (80%)
chr22	4811491	4811492	51324926	+	2	JAHKSD010000175.1	0	1	155865	0	0	0	0	1	0	0	0	0	HPRC_PLUS	male	3140		EUR	PGP - Ashkenazim Jewish	HG002	HG002 2 JAHKSD010000175.1	1364	0.555	0.882	0.839	0.54	TRUE	142	SD and High GA/TC (80%)	SD and High GA/TC (80%)
chr22	4823845	4823846	51324926	+	2	JAHKSD010000279.1	46708	46709	46709	0	0	0	0	1	0	0	0	0	HPRC_PLUS	male	3140		EUR	PGP - Ashkenazim Jewish	HG002	HG002 2 JAHKSD010000279.1	1365	0.537	0.882	0.603	0.62	TRUE	148	SD and High GA/TC (80%)	SD and High GA/TC (80%)
chr22	4894607	4894608	51324926	-	2	JAHKSD010000344.1	129972	129973	129973	0	0	0	0	1	0	0	0	0	HPRC_PLUS	male	3140		EUR	PGP - Ashkenazim Jewish	HG002	HG002 2 JAHKSD010000344.1	1366	0.558	0.667	0.845	0.531	TRUE	178	SD	SD and High GA/TC (80%)
chr22	4904793	4904794	51324926	+	2	JAHKSD010000028.1	3574530	3574531	3574531	0	0	0	0	1	0	0	0	0	HPRC_PLUS	male	3140		EUR	PGP - Ashkenazim Jewish	HG002	HG002 2 JAHKSD010000028.1	1367	0.551	0.886	0.799	0.544	TRUE	173	SD and High GA/TC (80%)	SD and High GA/TC (80%)
chr22	4917742	4917743	51324926	+	2	JAHKSD010000232.1	0	1	76617	0	0	0	0	1	0	0	0	0	HPRC_PLUS	male	3140		EUR	PGP - Ashkenazim Jewish	HG002	HG002 2 JAHKSD010000232.1	1368	0.599	0.883	0.767	0.62	TRUE	153	SD and High GA/TC (80%)	SD and High GA/TC (80%)
chr22	4951400	4951401	51324926	+	2	JAHKSD010000175.1	142890	142891	155865	0	0	0	0	1	0	0	0	0	HPRC_PLUS	male	3140		EUR	PGP - Ashkenazim Jewish	HG002	HG002 2 JAHKSD010000175.1	1369	0.532	0.883	0.781	0.621	TRUE	131	SD and High GA/TC (80%)	SD and High GA/TC (80%)
chr22	4976089	4976090	51324926	-	2	JAHKSD010000274.1	35166	35167	35167	0	0	0	0	1	0	0	0	0	HPRC_PLUS	male	3140		EUR	PGP - Ashkenazim Jewish	HG002	HG002 2 JAHKSD010000274.1	1370	0.598	0.797	0.843	0.572	TRUE	116	SD	SD and High GA/TC (80%)
chr22	4994171	4994172	51324926	+	2	JAHKSD010000232.1	76616	76617	76617	0	0	0	0	1	0	0	0	0	HPRC_PLUS	male	3140		EUR	PGP - Ashkenazim Jewish	HG002	HG002 2 JAHKSD010000232.1	1371	0.537	0.882	0.781	0.62	TRUE	109	SD and High GA/TC (80%)	SD and High GA/TC (80%)
chr22	5002339	5002340	51324926	+	2	JAHKSD010000144.1	0	1	46585	0	0	0	0	1	0	0	0	0	HPRC_PLUS	male	3140		EUR	PGP - Ashkenazim Jewish	HG002	HG002 2 JAHKSD010000144.1	1372	0.587	0.882	0.601	0.62	TRUE	105	SD and High GA/TC (80%)	SD and High GA/TC (80%)
chr22	5011214	5011215	51324926	-	2	JAHKSD010000274.1	0	1	35167	0	0	0	0	1	0	0	0	0	HPRC_PLUS	male	3140		EUR	PGP - Ashkenazim Jewish	HG002	HG002 2 JAHKSD010000274.1	1373	0.587	0.849	0.843	0.62	TRUE	102	SD and High GA/TC (80%)	SD and High GA/TC (80%)
chr22	5024734	5024735	51324926	-	2	JAHKSD010000344.1	0	1	129973	0	0	0	0	1	0	0	0	0	HPRC_PLUS	male	3140		EUR	PGP - Ashkenazim Jewish	HG002	HG002 2 JAHKSD010000344.1	1374	0.557	0.665	0.843	0.529	TRUE	101	SD	SD and High GA/TC (80%)
chr22	5048923	5048924	51324926	+	2	JAHKSD010000144.1	46584	46585	46585	0	0	0	0	1	0	0	0	0	HPRC_PLUS	male	3140		EUR	PGP - Ashkenazim Jewish	HG002	HG002 2 JAHKSD010000144.1	1375	0.589	0.883	0.774	0.622	TRUE	95	SD and High GA/TC (80%)	SD and High GA/TC (80%)
chr22	5139230	5139231	51324926	-	2	JAHKSD010000289.1	39135	39136	39136	0	0	0	0	1	0	0	0	0	HPRC_PLUS	male	3140		EUR	PGP - Ashkenazim Jewish	HG002	HG002 2 JAHKSD010000289.1	1376	0.599	0.848	0.843	0.62	TRUE	101	SD and High GA/TC (80%)	SD and High GA/TC (80%)
chr22	5178386	5178387	51324926	-	2	JAHKSD010000289.1	0	1	39136	0	0	0	0	1	0	0	0	0	HPRC_PLUS	male	3140		EUR	PGP - Ashkenazim Jewish	HG002	HG002 2 JAHKSD010000289.1	1377	0.587	0.882	0.775	0.62	TRUE	100	SD and High GA/TC (80%)	SD and High GA/TC (80%)
chr22	5210133	5210134	51324926	+	2	JAHKSD010000250.1	0	1	62687	0	0	0	0	1	0	0	0	0	HPRC_PLUS	male	3140		EUR	PGP - Ashkenazim Jewish	HG002	HG002 2 JAHKSD010000250.1	1378	0.538	0.883	0.78	0.573	TRUE	115	SD and High GA/TC (80%)	SD and High GA/TC (80%)
chr22	5213168	5213169	51324926	+	2	JAHKSD010000308.1	0	1	40585	0	0	0	0	1	0	0	0	0	HPRC_PLUS	male	3140		EUR	PGP - Ashkenazim Jewish	HG002	HG002 2 JAHKSD010000308.1	1379	0.537	0.883	0.606	0.621	TRUE	116	SD and High GA/TC (80%)	SD and High GA/TC (80%)
chr22	5253737	5253738	51324926	+	2	JAHKSD010000308.1	40584	40585	40585	0	0	0	0	1	0	0	0	0	HPRC_PLUS	male	3140		EUR	PGP - Ashkenazim Jewish	HG002	HG002 2 JAHKSD010000308.1	1380	0.535	0.886	0.781	0.621	TRUE	123	SD and High GA/TC (80%)	SD and High GA/TC (80%)
chr22	5272818	5272819	51324926	+	2	JAHKSD010000250.1	62686	62687	62687	0	0	0	0	1	0	0	0	0	HPRC_PLUS	male	3140		EUR	PGP - Ashkenazim Jewish	HG002	HG002 2 JAHKSD010000250.1	1381	0.598	0.805	0.845	0.621	TRUE	119	SD and High GA/TC (80%)	SD and High GA/TC (80%)
chr22	5292545	5292546	51324926	+	2	JAHKSD010000385.1	27	28	43309	0	0	0	0	1	0	0	0	0	HPRC_PLUS	male	3140		EUR	PGP - Ashkenazim Jewish	HG002	HG002 2 JAHKSD010000385.1	1382	0.552	0.884	0.837	0.541	TRUE	131	SD and High GA/TC (80%)	SD and High GA/TC (80%)
chr22	5295481	5295482	51324926	-	2	JAHKSD010000262.1	44864	44865	44865	0	0	0	0	1	0	0	0	0	HPRC_PLUS	male	3140		EUR	PGP - Ashkenazim Jewish	HG002	HG002 2 JAHKSD010000262.1	1383	0.549	0.884	0.799	0.542	TRUE	130	SD and High GA/TC (80%)	SD and High GA/TC (80%)
chr22	5296696	5296697	51324926	-	2	JAHKSD010000335.1	40110	40111	40111	0	0	0	0	1	0	0	0	0	HPRC_PLUS	male	3140		EUR	PGP - Ashkenazim Jewish	HG002	HG002 2 JAHKSD010000335.1	1384	0.537	0.884	0.778	0.542	TRUE	130	SD and High GA/TC (80%)	SD and High GA/TC (80%)
chr22	5320309	5320310	51324926	-	2	JAHKSD010000134.1	231947	231948	231948	0	0	0	0	1	0	0	0	0	HPRC_PLUS	male	3140		EUR	PGP - Ashkenazim Jewish	HG002	HG002 2 JAHKSD010000134.1	1385	0.599	0.798	0.843	0.573	TRUE	130	SD	SD and High GA/TC (80%)
chr22	5335869	5335870	51324926	+	2	JAHKSD010000385.1	43308	43309	43309	0	0	0	0	1	0	0	0	0	HPRC_PLUS	male	3140		EUR	PGP - Ashkenazim Jewish	HG002	HG002 2 JAHKSD010000385.1	1386	0.558	0.883	0.838	0.541	TRUE	135	SD and High GA/TC (80%)	SD and High GA/TC (80%)
chr22	5336819	5336820	51324926	-	2	JAHKSD010000335.1	0	1	40111	0	0	0	0	1	0	0	0	0	HPRC_PLUS	male	3140		EUR	PGP - Ashkenazim Jewish	HG002	HG002 2 JAHKSD010000335.1	1387	0.558	0.883	0.808	0.541	TRUE	134	SD and High GA/TC (80%)	SD and High GA/TC (80%)
chr22	5340340	5340341	51324926	-	2	JAHKSD010000262.1	0	1	44865	0	0	0	0	1	0	0	0	0	HPRC_PLUS	male	3140		EUR	PGP - Ashkenazim Jewish	HG002	HG002 2 JAHKSD010000262.1	1388	0.537	0.883	0.78	0.595	TRUE	139	SD and High GA/TC (80%)	SD and High GA/TC (80%)
chr22	5385175	5385176	51324926	-	2	JAHKSD010000242.1	202064	202065	202065	0	0	0	0	1	0	0	0	0	HPRC_PLUS	male	3140		EUR	PGP - Ashkenazim Jewish	HG002	HG002 2 JAHKSD010000242.1	1389	0.537	0.883	0.781	0.619	TRUE	185	SD and High GA/TC (80%)	SD and High GA/TC (80%)
chr22	5453798	5453799	51324926	+	2	JAHKSD010000390.1	0	1	59277	0	0	0	0	1	0	0	0	0	HPRC_PLUS	male	3140		EUR	PGP - Ashkenazim Jewish	HG002	HG002 2 JAHKSD010000390.1	1390	0.595	0.806	0.844	0.578	TRUE	378	SD and High GA/TC (80%)	SD and High GA/TC (80%)
chr22	5472888	5472889	51324926	-	2	JAHKSD010000293.1	75348	75349	75349	0	0	0	0	1	0	0	0	0	HPRC_PLUS	male	3140		EUR	PGP - Ashkenazim Jewish	HG002	HG002 2 JAHKSD010000293.1	1391	0.534	0.885	0.605	0.62	TRUE	396	SD and High GA/TC (80%)	SD and High GA/TC (80%)
chr22	5474619	5474620	51324926	+	2	JAHKSD010000430.1	0	1	60728	0	0	0	0	1	0	0	0	0	HPRC_PLUS	male	3140		EUR	PGP - Ashkenazim Jewish	HG002	HG002 2 JAHKSD010000430.1	1392	0.534	0.885	0.605	0.62	TRUE	397	SD and High GA/TC (80%)	SD and High GA/TC (80%)
chr22	5479710	5479711	51324926	+	2	JAHKSD010000193.1	0	1	87372	0	0	0	0	1	0	0	0	0	HPRC_PLUS	male	3140		EUR	PGP - Ashkenazim Jewish	HG002	HG002 2 JAHKSD010000193.1	1393	0.598	0.885	0.605	0.62	TRUE	398	SD and High GA/TC (80%)	SD and High GA/TC (80%)
chr22	5482221	5482222	51324926	+	2	JAHKSD010000259.1	6	7	30638	0	0	0	0	1	0	0	0	0	HPRC_PLUS	male	3140		EUR	PGP - Ashkenazim Jewish	HG002	HG002 2 JAHKSD010000259.1	1394	0.598	0.882	0.775	0.62	TRUE	397	SD and High GA/TC (80%)	SD and High GA/TC (80%)
chr22	5511217	5511218	51324926	+	2	JAHKSD010000102.1	0	1	166575	0	0	0	0	1	0	0	0	0	HPRC_PLUS	male	3140		EUR	PGP - Ashkenazim Jewish	HG002	HG002 2 JAHKSD010000102.1	1395	0.558	0.883	0.796	0.538	TRUE	451	SD and High GA/TC (80%)	SD and High GA/TC (80%)
chr22	5512831	5512832	51324926	+	2	JAHKSD010000259.1	30637	30638	30638	0	0	0	0	1	0	0	0	0	HPRC_PLUS	male	3140		EUR	PGP - Ashkenazim Jewish	HG002	HG002 2 JAHKSD010000259.1	1396	0.537	0.883	0.796	0.538	TRUE	449	SD and High GA/TC (80%)	SD and High GA/TC (80%)
chr22	5513124	5513125	51324926	+	2	JAHKSD010000390.1	59276	59277	59277	0	0	0	0	1	0	0	0	0	HPRC_PLUS	male	3140		EUR	PGP - Ashkenazim Jewish	HG002	HG002 2 JAHKSD010000390.1	1397	0.537	0.883	0.796	0.538	TRUE	450	SD and High GA/TC (80%)	SD and High GA/TC (80%)
chr22	5535229	5535230	51324926	+	2	JAHKSD010000430.1	60727	60728	60728	0	0	0	0	1	0	0	0	0	HPRC_PLUS	male	3140		EUR	PGP - Ashkenazim Jewish	HG002	HG002 2 JAHKSD010000430.1	1398	0.587	0.8	0.843	0.587	TRUE	483	SD and High GA/TC (80%)	SD and High GA/TC (80%)
chr22	5546789	5546790	51324926	-	2	JAHKSD010000293.1	0	1	75349	0	0	0	0	1	0	0	0	0	HPRC_PLUS	male	3140		EUR	PGP - Ashkenazim Jewish	HG002	HG002 2 JAHKSD010000293.1	1399	0.556	0.88	0.843	0.54	TRUE	501	SD and High GA/TC (80%)	SD and High GA/TC (80%)
chr22	5549095	5549096	51324926	-	2	JAHKSD010000134.1	0	1	231948	0	0	0	0	1	0	0	0	0	HPRC_PLUS	male	3140		EUR	PGP - Ashkenazim Jewish	HG002	HG002 2 JAHKSD010000134.1	1400	0.556	0.881	0.839	0.54	TRUE	503	SD and High GA/TC (80%)	SD and High GA/TC (80%)
chr22	5567107	5567108	51324926	+	2	JAHKSD010000193.1	87371	87372	87372	0	0	0	0	1	0	0	0	0	HPRC_PLUS	male	3140		EUR	PGP - Ashkenazim Jewish	HG002	HG002 2 JAHKSD010000193.1	1401	0.587	0.881	0.608	0.62	TRUE	501	SD and High GA/TC (80%)	SD and High GA/TC (80%)
chr22	5577464	5577465	51324926	-	2	JAHKSD010000137.1	55564	55565	55565	0	0	0	0	1	0	0	0	0	HPRC_PLUS	male	3140		EUR	PGP - Ashkenazim Jewish	HG002	HG002 2 JAHKSD010000137.1	1402	0.587	0.8	0.845	0.62	TRUE	494	SD and High GA/TC (80%)	SD and High GA/TC (80%)
chr22	5585299	5585300	51324926	-	2	JAHKSD010000242.1	0	1	202065	0	0	0	0	1	0	0	0	0	HPRC_PLUS	male	3140		EUR	PGP - Ashkenazim Jewish	HG002	HG002 2 JAHKSD010000242.1	1403	0.587	0.8	0.845	0.572	TRUE	502	SD and High GA/TC (80%)	SD and High GA/TC (80%)
chr22	5587003	5587004	51324926	+	2	JAHKSD010000236.1	0	1	44611	0	0	0	0	1	0	0	0	0	HPRC_PLUS	male	3140		EUR	PGP - Ashkenazim Jewish	HG002	HG002 2 JAHKSD010000236.1	1404	0.55	0.781	0.845	0.572	TRUE	507	SD	SD and High GA/TC (80%)
chr22	5592830	5592831	51324926	-	2	JAHKSD010000119.1	34680	34681	34681	0	0	0	0	1	0	0	0	0	HPRC_PLUS	male	3140		EUR	PGP - Ashkenazim Jewish	HG002	HG002 2 JAHKSD010000119.1	1405	0.55	0.882	0.838	0.538	TRUE	510	SD and High GA/TC (80%)	SD and High GA/TC (80%)
chr22	5594868	5594869	51324926	+	2	JAHKSD010000283.1	0	1	35194	0	0	0	0	1	0	0	0	0	HPRC_PLUS	male	3140		EUR	PGP - Ashkenazim Jewish	HG002	HG002 2 JAHKSD010000283.1	1406	0.55	0.882	0.838	0.545	TRUE	509	SD and High GA/TC (80%)	SD and High GA/TC (80%)
chr22	5594990	5594991	51324926	-	2	JAHKSD010000039.1	35409	35410	35410	0	0	0	0	1	0	0	0	0	HPRC_PLUS	male	3140		EUR	PGP - Ashkenazim Jewish	HG002	HG002 2 JAHKSD010000039.1	1407	0.55	0.882	0.838	0.545	TRUE	509	SD and High GA/TC (80%)	SD and High GA/TC (80%)
chr22	5595635	5595636	51324926	+	2	JAHKSD010000143.1	0	1	35432	0	0	0	0	1	0	0	0	0	HPRC_PLUS	male	3140		EUR	PGP - Ashkenazim Jewish	HG002	HG002 2 JAHKSD010000143.1	1408	0.55	0.882	0.838	0.545	TRUE	508	SD and High GA/TC (80%)	SD and High GA/TC (80%)
chr22	5601117	5601118	51324926	+	2	JAHKSD010000255.1	0	1	31484	0	0	0	0	1	0	0	0	0	HPRC_PLUS	male	3140		EUR	PGP - Ashkenazim Jewish	HG002	HG002 2 JAHKSD010000255.1	1409	0.536	0.882	0.779	0.545	TRUE	510	SD and High GA/TC (80%)	SD and High GA/TC (80%)
chr22	5627473	5627474	51324926	-	2	JAHKSD010000119.1	0	1	34681	0	0	0	0	1	0	0	0	0	HPRC_PLUS	male	3140		EUR	PGP - Ashkenazim Jewish	HG002	HG002 2 JAHKSD010000119.1	1410	0.595	0.804	0.843	0.587	TRUE	403	SD and High GA/TC (80%)	SD and High GA/TC (80%)
chr22	5630030	5630031	51324926	+	2	JAHKSD010000283.1	35193	35194	35194	0	0	0	0	1	0	0	0	0	HPRC_PLUS	male	3140		EUR	PGP - Ashkenazim Jewish	HG002	HG002 2 JAHKSD010000283.1	1411	0.561	0.804	0.843	0.587	TRUE	397	SD and High GA/TC (80%)	SD and High GA/TC (80%)
chr22	5630111	5630112	51324926	+	2	JAHKSD010000236.1	44610	44611	44611	0	0	0	0	1	0	0	0	0	HPRC_PLUS	male	3140		EUR	PGP - Ashkenazim Jewish	HG002	HG002 2 JAHKSD010000236.1	1412	0.555	0.804	0.843	0.587	TRUE	397	SD and High GA/TC (80%)	SD and High GA/TC (80%)
chr22	5630362	5630363	51324926	-	2	JAHKSD010000039.1	0	1	35410	0	0	0	0	1	0	0	0	0	HPRC_PLUS	male	3140		EUR	PGP - Ashkenazim Jewish	HG002	HG002 2 JAHKSD010000039.1	1413	0.555	0.804	0.843	0.587	TRUE	397	SD and High GA/TC (80%)	SD and High GA/TC (80%)
chr22	5631057	5631058	51324926	+	2	JAHKSD010000143.1	35431	35432	35432	0	0	0	0	1	0	0	0	0	HPRC_PLUS	male	3140		EUR	PGP - Ashkenazim Jewish	HG002	HG002 2 JAHKSD010000143.1	1414	0.555	0.804	0.843	0.587	TRUE	398	SD and High GA/TC (80%)	SD and High GA/TC (80%)
chr22	5631495	5631496	51324926	-	2	JAHKSD010000137.1	1	2	55565	0	0	0	0	1	0	0	0	0	HPRC_PLUS	male	3140		EUR	PGP - Ashkenazim Jewish	HG002	HG002 2 JAHKSD010000137.1	1415	0.555	0.804	0.843	0.587	TRUE	398	SD and High GA/TC (80%)	SD and High GA/TC (80%)
chr22	5632585	5632586	51324926	+	2	JAHKSD010000255.1	31483	31484	31484	0	0	0	0	1	0	0	0	0	HPRC_PLUS	male	3140		EUR	PGP - Ashkenazim Jewish	HG002	HG002 2 JAHKSD010000255.1	1416	0.555	0.739	0.843	0.539	TRUE	396	SD	SD and High GA/TC (80%)
chr22	5669592	5669593	51324926	+	2	JAHKSD010000110.1	0	1	1791271	0	0	0	0	1	0	0	0	0	HPRC_PLUS	male	3140		EUR	PGP - Ashkenazim Jewish	HG002	HG002 2 JAHKSD010000110.1	1417	0.586	0.803	0.842	0.589	TRUE	277	SD and High GA/TC (80%)	SD and High GA/TC (80%)
chr22	5678797	5678798	51324926	+	2	JAHKSD010000102.1	166571	166572	166575	0	0	0	0	1	0	0	0	0	HPRC_PLUS	male	3140		EUR	PGP - Ashkenazim Jewish	HG002	HG002 2 JAHKSD010000102.1	1418	0.556	0.741	0.842	0.526	TRUE	268	SD	SD and High GA/TC (80%)
chr22	7203589	7203590	51324926	-	2	JAHKSD010000043.1	6299324	6299325	6316326	0	0	0	0	1	0	0	0	0	HPRC_PLUS	male	3140		EUR	PGP - Ashkenazim Jewish	HG002	HG002 2 JAHKSD010000043.1	1419	0.282	0.759	0.427	0.608	TRUE	2	Poisson breaks	Chromosome end or Poisson
chr22	7228135	7228136	51324926	-	2	JAHKSD010000125.1	18937	18938	1726595	0	0	0	0	1	0	0	0	0	HPRC_PLUS	male	3140		EUR	PGP - Ashkenazim Jewish	HG002	HG002 2 JAHKSD010000125.1	1420	0.28	0.755	0.425	0.613	TRUE	2	Poisson breaks	Chromosome end or Poisson
chr22	15327128	15327129	51324926	+	2	JAHKSD010000121.1	0	1	983311	0	0	0	0	1	0	0	0	0	HPRC_PLUS	male	3140		EUR	PGP - Ashkenazim Jewish	HG002	HG002 2 JAHKSD010000121.1	1421	0.496	0.528	0.402	0.621	FALSE	18	Alpha	Satellite
chr22	15559683	15559684	51324926	+	2	JAHKSD010000011.1	0	1	20202201	0	0	0	0	1	0	0	0	0	HPRC_PLUS	male	3140		EUR	PGP - Ashkenazim Jewish	HG002	HG002 2 JAHKSD010000011.1	1422	0.497	0.523	0.4	0.625	FALSE	43	Alpha	Satellite
chr22	15670482	15670483	51324926	+	2	JAHKSD010000121.1	983305	983306	983311	0	0	0	0	1	0	0	0	0	HPRC_PLUS	male	3140		EUR	PGP - Ashkenazim Jewish	HG002	HG002 2 JAHKSD010000121.1	1423	0.492	0.525	0.399	0.624	FALSE	25	Alpha	Satellite
chr22	15718758	15718759	51324926	-	2	JAHKSD010000043.1	12526	12527	6316326	100	100	100	1	0	0	0	0	0	HPRC_PLUS	male	3140		EUR	PGP - Ashkenazim Jewish	HG002	HG002 2 JAHKSD010000043.1	1424	0.645	0.535	0.532	0.679	FALSE	9	SD	SD and High GA/TC (80%)
chr22	35080638	35080639	51324926	+	2	JAHKSD010000011.1	20202200	20202201	20202201	0	0	0	0	1	0	0	0	0	HPRC_PLUS	male	3140		EUR	PGP - Ashkenazim Jewish	HG002	HG002 2 JAHKSD010000011.1	1425	0.618	0.594	0.716	0.661	FALSE	3	other	other
chr22	35141197	35141198	51324926	-	2	JAHKSD010000050.1	3429452	3429453	3429453	0	0	0	0	1	0	0	0	0	HPRC_PLUS	male	3140		EUR	PGP - Ashkenazim Jewish	HG002	HG002 2 JAHKSD010000050.1	1426	0.598	0.639	0.687	0.714	FALSE	4	other	other
chr22	38573253	38573254	51324926	-	2	JAHKSD010000050.1	0	1	3429453	0	0	0	0	1	0	0	0	0	HPRC_PLUS	male	3140		EUR	PGP - Ashkenazim Jewish	HG002	HG002 2 JAHKSD010000050.1	1427	0.914	0.588	0.664	0.6	FALSE	147	High GA/TC (80%)	High GA/TC (80%)
chr22	38573314	38573315	51324926	-	2	JAHKSD010000035.1	12751493	12751494	12751508	0	0	0	0	1	0	0	0	0	HPRC_PLUS	male	3140		EUR	PGP - Ashkenazim Jewish	HG002	HG002 2 JAHKSD010000035.1	1428	0.914	0.588	0.664	0.6	FALSE	147	High GA/TC (80%)	High GA/TC (80%)
chr22	51324925	51324926	51324926	-	2	JAHKSD010000035.1	4548	4549	12751508	0	0	0	0	1	0	0	0	0	HPRC_PLUS	male	3140		EUR	PGP - Ashkenazim Jewish	HG002	HG002 2 JAHKSD010000035.1	1429	0.684	0.565	0.743	0.668	FALSE	94	Chromosome end	Chromosome end or Poisson
chr3	1	2	201105948	+	2	JAHKSD010000036.1	4734	4735	91334609	0	0	0	0	1	0	0	0	0	HPRC_PLUS	male	3140		EUR	PGP - Ashkenazim Jewish	HG002	HG002 2 JAHKSD010000036.1	1430	0.613	0.68	0.785	0.686	FALSE	94	Chromosome end	Chromosome end or Poisson
chr3	91736139	91736140	201105948	-	2	JAHKSD010000177.1	578081	578082	578592	0	0	0	0	1	0	0	0	0	HPRC_PLUS	male	3140		EUR	PGP - Ashkenazim Jewish	HG002	HG002 2 JAHKSD010000177.1	1431	0.517	0.523	0.387	0.672	FALSE	8	Alpha	Satellite
chr3	91767531	91767532	201105948	+	2	JAHKSD010000036.1	91334608	91334609	91334609	0	0	0	0	1	0	0	0	0	HPRC_PLUS	male	3140		EUR	PGP - Ashkenazim Jewish	HG002	HG002 2 JAHKSD010000036.1	1432	0.513	0.513	0.39	0.629	FALSE	12	Alpha	Satellite
chr3	91882670	91882671	201105948	+	2	JAHKSD010000103.1	0	1	92577	0	0	0	0	1	0	0	0	0	HPRC_PLUS	male	3140		EUR	PGP - Ashkenazim Jewish	HG002	HG002 2 JAHKSD010000103.1	1433	0.513	0.516	0.394	0.628	FALSE	19	Alpha	Satellite
chr3	91964021	91964022	201105948	-	2	JAHKSD010000330.1	0	1	174789	0	0	0	0	1	0	0	0	0	HPRC_PLUS	male	3140		EUR	PGP - Ashkenazim Jewish	HG002	HG002 2 JAHKSD010000330.1	1434	0.515	0.516	0.391	0.628	FALSE	25	Alpha	Satellite
chr3	91976764	91976765	201105948	+	2	JAHKSD010000103.1	92576	92577	92577	0	0	0	0	1	0	0	0	0	HPRC_PLUS	male	3140		EUR	PGP - Ashkenazim Jewish	HG002	HG002 2 JAHKSD010000103.1	1435	0.513	0.516	0.393	0.629	FALSE	23	Alpha	Satellite
chr3	92007818	92007819	201105948	+	2	JAHKSD010000192.1	0	1	789228	0	0	0	0	1	0	0	0	0	HPRC_PLUS	male	3140		EUR	PGP - Ashkenazim Jewish	HG002	HG002 2 JAHKSD010000192.1	1436	0.512	0.515	0.393	0.628	FALSE	24	Alpha	Satellite
chr3	92016908	92016909	201105948	-	2	JAHKSD010000330.1	174788	174789	174789	0	0	0	0	1	0	0	0	0	HPRC_PLUS	male	3140		EUR	PGP - Ashkenazim Jewish	HG002	HG002 2 JAHKSD010000330.1	1437	0.512	0.515	0.393	0.632	FALSE	27	Alpha	Satellite
chr3	92135139	92135140	201105948	-	2	JAHKSD010000182.1	389136	389137	389138	0	0	0	0	1	0	0	0	0	HPRC_PLUS	male	3140		EUR	PGP - Ashkenazim Jewish	HG002	HG002 2 JAHKSD010000182.1	1438	0.514	0.512	0.395	0.627	FALSE	311	Alpha	Satellite
chr3	92160454	92160455	201105948	-	2	JAHKSD010000233.1	336945	336946	350455	0	0	0	0	1	0	0	0	0	HPRC_PLUS	male	3140		EUR	PGP - Ashkenazim Jewish	HG002	HG002 2 JAHKSD010000233.1	1439	0.513	0.517	0.396	0.626	FALSE	461	Alpha	Satellite
chr3	92181806	92181807	201105948	+	2	JAHKSD010000256.1	0	1	187447	0	0	0	0	1	0	0	0	0	HPRC_PLUS	male	3140		EUR	PGP - Ashkenazim Jewish	HG002	HG002 2 JAHKSD010000256.1	1440	0.511	0.514	0.393	0.628	FALSE	486	Alpha	Satellite
chr3	92240734	92240735	201105948	+	2	JAHKSD010000192.1	789227	789228	789228	100	100	100	1	0	0	0	0	0	HPRC_PLUS	male	3140		EUR	PGP - Ashkenazim Jewish	HG002	HG002 2 JAHKSD010000192.1	1441	0.511	0.511	0.395	0.629	FALSE	779	Alpha	Satellite
chr3	92285468	92285469	201105948	-	2	JAHKSD010000063.1	108243955	108243956	108243956	0	0	0	0	1	0	0	0	0	HPRC_PLUS	male	3140		EUR	PGP - Ashkenazim Jewish	HG002	HG002 2 JAHKSD010000063.1	1442	0.513	0.513	0.394	0.624	FALSE	871	Alpha	Satellite
chr3	92302695	92302696	201105948	-	2	JAHKSD010000177.1	0	1	578592	0	0	0	0	1	0	0	0	0	HPRC_PLUS	male	3140		EUR	PGP - Ashkenazim Jewish	HG002	HG002 2 JAHKSD010000177.1	1443	0.511	0.513	0.394	0.624	FALSE	852	Alpha	Satellite
chr3	92340581	92340582	201105948	-	2	JAHKSD010000337.1	68908	68909	68909	0	0	0	0	1	0	0	0	0	HPRC_PLUS	male	3140		EUR	PGP - Ashkenazim Jewish	HG002	HG002 2 JAHKSD010000337.1	1444	0.511	0.514	0.394	0.625	FALSE	664	Alpha	Satellite
chr3	92381617	92381618	201105948	+	2	JAHKSD010000256.1	187446	187447	187447	0	0	0	0	1	0	0	0	0	HPRC_PLUS	male	3140		EUR	PGP - Ashkenazim Jewish	HG002	HG002 2 JAHKSD010000256.1	1445	0.513	0.512	0.393	0.628	FALSE	600	Alpha	Satellite
chr3	92409441	92409442	201105948	-	2	JAHKSD010000337.1	0	1	68909	0	0	0	0	1	0	0	0	0	HPRC_PLUS	male	3140		EUR	PGP - Ashkenazim Jewish	HG002	HG002 2 JAHKSD010000337.1	1446	0.512	0.512	0.394	0.626	FALSE	504	Alpha	Satellite
chr3	92485492	92485493	201105948	-	2	JAHKSD010000154.1	52884	52885	52885	0	0	0	0	1	0	0	0	0	HPRC_PLUS	male	3140		EUR	PGP - Ashkenazim Jewish	HG002	HG002 2 JAHKSD010000154.1	1447	0.513	0.512	0.393	0.63	FALSE	494	Alpha	Satellite
chr3	92534741	92534742	201105948	-	2	JAHKSD010000182.1	0	1	389138	0	0	0	0	1	0	0	0	0	HPRC_PLUS	male	3140		EUR	PGP - Ashkenazim Jewish	HG002	HG002 2 JAHKSD010000182.1	1448	0.513	0.512	0.394	0.628	FALSE	404	Alpha	Satellite
chr3	92539390	92539391	201105948	-	2	JAHKSD010000154.1	0	1	52885	0	0	0	0	1	0	0	0	0	HPRC_PLUS	male	3140		EUR	PGP - Ashkenazim Jewish	HG002	HG002 2 JAHKSD010000154.1	1449	0.513	0.512	0.394	0.628	FALSE	396	Alpha	Satellite
chr3	96184641	96184642	201105948	-	2	JAHKSD010000233.1	0	1	350455	0	0	0	0	1	0	0	0	0	HPRC_PLUS	male	3140		EUR	PGP - Ashkenazim Jewish	HG002	HG002 2 JAHKSD010000233.1	1450	0.512	0.515	0.391	0.63	FALSE	18	Alpha	Satellite
chr3	201101394	201101395	201105948	-	2	JAHKSD010000063.1	6	7	108243956	0	0	0	0	1	0	0	0	0	HPRC_PLUS	male	3140		EUR	PGP - Ashkenazim Jewish	HG002	HG002 2 JAHKSD010000063.1	1451	0.691	0.581	0.749	0.543	FALSE	132	Chromosome end	Chromosome end or Poisson
chr4	24547	24548	193574945	-	2	JAHKSD010000034.1	49380215	49380216	49380216	0	0	0	0	1	0	0	0	0	HPRC_PLUS	male	3140		EUR	PGP - Ashkenazim Jewish	HG002	HG002 2 JAHKSD010000034.1	1452	0.594	0.611	0.502	0.704	FALSE	124	Chromosome end	Chromosome end or Poisson
chr4	49238314	49238315	193574945	-	2	JAHKSD010000034.1	0	1	49380216	0	0	0	0	1	0	0	0	0	HPRC_PLUS	male	3140		EUR	PGP - Ashkenazim Jewish	HG002	HG002 2 JAHKSD010000034.1	1453	0.643	0.561	0.704	0.684	FALSE	32	SD	SD and High GA/TC (80%)
chr4	49535448	49535449	193574945	-	2	JAHKSD010000156.1	1450894	1450895	1532755	0	0	0	0	1	0	0	0	0	HPRC_PLUS	male	3140		EUR	PGP - Ashkenazim Jewish	HG002	HG002 2 JAHKSD010000156.1	1454	0.544	0.768	0.488	0.712	FALSE	6	SD	SD and High GA/TC (80%)
chr4	49547333	49547334	193574945	+	2	JAHKSD010000163.1	346585	346586	387936	0	0	0	0	1	0	0	0	0	HPRC_PLUS	male	3140		EUR	PGP - Ashkenazim Jewish	HG002	HG002 2 JAHKSD010000163.1	1455	0.304	0.768	0.5	0.569	FALSE	6	SD	SD and High GA/TC (80%)
chr4	50114119	50114120	193574945	-	2	JAHKSD010000156.1	21390	21391	1532755	0	0	0	0	1	0	0	0	0	HPRC_PLUS	male	3140		EUR	PGP - Ashkenazim Jewish	HG002	HG002 2 JAHKSD010000156.1	1456	0.522	0.501	0.387	0.638	FALSE	18	Alpha	Satellite
chr4	50265865	50265866	193574945	+	2	JAHKSD010000363.1	0	1	66553	0	0	0	0	1	0	0	0	0	HPRC_PLUS	male	3140		EUR	PGP - Ashkenazim Jewish	HG002	HG002 2 JAHKSD010000363.1	1457	0.524	0.503	0.39	0.642	FALSE	295	Alpha	Satellite
chr4	50267201	50267202	193574945	+	2	JAHKSD010000368.1	0	1	60526	0	0	0	0	1	0	0	0	0	HPRC_PLUS	male	3140		EUR	PGP - Ashkenazim Jewish	HG002	HG002 2 JAHKSD010000368.1	1458	0.524	0.503	0.39	0.642	FALSE	295	Alpha	Satellite
chr4	50267517	50267518	193574945	-	2	JAHKSD010000294.1	79068	79069	79069	0	0	0	0	1	0	0	0	0	HPRC_PLUS	male	3140		EUR	PGP - Ashkenazim Jewish	HG002	HG002 2 JAHKSD010000294.1	1459	0.524	0.503	0.39	0.642	FALSE	295	Alpha	Satellite
chr4	50271367	50271368	193574945	-	2	JAHKSD010000348.1	100751	100752	100752	0	0	0	0	1	0	0	0	0	HPRC_PLUS	male	3140		EUR	PGP - Ashkenazim Jewish	HG002	HG002 2 JAHKSD010000348.1	1460	0.523	0.503	0.39	0.642	FALSE	299	Alpha	Satellite
chr4	50274825	50274826	193574945	-	2	JAHKSD010000005.1	139957524	139957525	139957525	0	0	0	0	1	0	0	0	0	HPRC_PLUS	male	3140		EUR	PGP - Ashkenazim Jewish	HG002	HG002 2 JAHKSD010000005.1	1461	0.523	0.5	0.39	0.642	FALSE	300	Alpha	Satellite
chr4	50327767	50327768	193574945	+	2	JAHKSD010000368.1	60525	60526	60526	0	0	0	0	1	0	0	0	0	HPRC_PLUS	male	3140		EUR	PGP - Ashkenazim Jewish	HG002	HG002 2 JAHKSD010000368.1	1462	0.527	0.5	0.391	0.638	FALSE	339	Alpha	Satellite
chr4	50332475	50332476	193574945	+	2	JAHKSD010000363.1	66552	66553	66553	0	0	0	0	1	0	0	0	0	HPRC_PLUS	male	3140		EUR	PGP - Ashkenazim Jewish	HG002	HG002 2 JAHKSD010000363.1	1463	0.525	0.5	0.389	0.638	FALSE	341	Alpha	Satellite
chr4	50345278	50345279	193574945	-	2	JAHKSD010000294.1	0	1	79069	0	0	0	0	1	0	0	0	0	HPRC_PLUS	male	3140		EUR	PGP - Ashkenazim Jewish	HG002	HG002 2 JAHKSD010000294.1	1464	0.527	0.5	0.39	0.638	FALSE	356	Alpha	Satellite
chr4	50372513	50372514	193574945	-	2	JAHKSD010000348.1	0	1	100752	0	0	0	0	1	0	0	0	0	HPRC_PLUS	male	3140		EUR	PGP - Ashkenazim Jewish	HG002	HG002 2 JAHKSD010000348.1	1465	0.524	0.498	0.391	0.641	FALSE	222	Alpha	Satellite
chr4	193574944	193574945	193574945	-	2	JAHKSD010000005.1	5174	5175	139957525	0	0	0	0	1	0	0	0	0	HPRC_PLUS	male	3140		EUR	PGP - Ashkenazim Jewish	HG002	HG002 2 JAHKSD010000005.1	1466	0.692	0.563	0.717	0.668	FALSE	118	Chromosome end	Chromosome end or Poisson
chr5	0	1	182045439	+	2	JAHKSD010000032.1	6300	6301	47503194	0	0	0	0	1	0	0	0	0	HPRC_PLUS	male	3140		EUR	PGP - Ashkenazim Jewish	HG002	HG002 2 JAHKSD010000032.1	1467	0.589	0.682	0.789	0.686	FALSE	100	Chromosome end	Chromosome end or Poisson
chr5	46708385	46708386	182045439	+	2	JAHKSD010000058.1	0	1	21026702	0	0	0	0	1	0	0	0	0	HPRC_PLUS	male	3140		EUR	PGP - Ashkenazim Jewish	HG002	HG002 2 JAHKSD010000058.1	1468	0.506	0.53	0.405	0.62	FALSE	37	Alpha	Satellite
chr5	49363767	49363768	182045439	+	2	JAHKSD010000032.1	47411953	47411954	47503194	0	0	0	0	1	0	0	0	0	HPRC_PLUS	male	3140		EUR	PGP - Ashkenazim Jewish	HG002	HG002 2 JAHKSD010000032.1	1469	0.506	0.52	0.403	0.618	FALSE	185	Alpha	Satellite
chr5	49406418	49406419	182045439	+	2	JAHKSD010000147.1	4300	4301	82093	0	0	0	0	1	0	0	0	0	HPRC_PLUS	male	3140		EUR	PGP - Ashkenazim Jewish	HG002	HG002 2 JAHKSD010000147.1	1470	0.503	0.518	0.404	0.621	FALSE	303	Alpha	Satellite
chr5	49407149	49407150	182045439	+	2	JAHKSD010000351.1	0	1	69495	0	0	0	0	1	0	0	0	0	HPRC_PLUS	male	3140		EUR	PGP - Ashkenazim Jewish	HG002	HG002 2 JAHKSD010000351.1	1471	0.503	0.518	0.404	0.621	FALSE	303	Alpha	Satellite
chr5	49412872	49412873	182045439	+	2	JAHKSD010000280.1	4928	4929	118933	0	0	0	0	1	0	0	0	0	HPRC_PLUS	male	3140		EUR	PGP - Ashkenazim Jewish	HG002	HG002 2 JAHKSD010000280.1	1472	0.502	0.518	0.404	0.621	FALSE	303	Alpha	Satellite
chr5	49412872	49412873	182045439	-	2	JAHKSD010000295.1	188472	188473	197264	0	0	0	0	1	0	0	0	0	HPRC_PLUS	male	3140		EUR	PGP - Ashkenazim Jewish	HG002	HG002 2 JAHKSD010000295.1	1473	0.502	0.518	0.404	0.621	FALSE	303	Alpha	Satellite
chr5	49412874	49412875	182045439	+	2	JAHKSD010000323.1	3198	3199	325848	0	0	0	0	1	0	0	0	0	HPRC_PLUS	male	3140		EUR	PGP - Ashkenazim Jewish	HG002	HG002 2 JAHKSD010000323.1	1474	0.502	0.518	0.404	0.621	FALSE	303	Alpha	Satellite
chr5	49413667	49413668	182045439	+	2	JAHKSD010000389.1	664	665	73328	0	0	0	0	1	0	0	0	0	HPRC_PLUS	male	3140		EUR	PGP - Ashkenazim Jewish	HG002	HG002 2 JAHKSD010000389.1	1475	0.502	0.518	0.404	0.621	FALSE	303	Alpha	Satellite
chr5	49413672	49413673	182045439	+	2	JAHKSD010000054.1	108	109	387739	0	0	0	0	1	0	0	0	0	HPRC_PLUS	male	3140		EUR	PGP - Ashkenazim Jewish	HG002	HG002 2 JAHKSD010000054.1	1476	0.502	0.518	0.404	0.621	FALSE	303	Alpha	Satellite
chr5	49413698	49413699	182045439	-	2	JAHKSD010000287.1	148912	148913	171198	0	0	0	0	1	0	0	0	0	HPRC_PLUS	male	3140		EUR	PGP - Ashkenazim Jewish	HG002	HG002 2 JAHKSD010000287.1	1477	0.502	0.518	0.404	0.621	FALSE	303	Alpha	Satellite
chr5	49416348	49416349	182045439	+	2	JAHKSD010000240.1	0	1	126999	0	0	0	0	1	0	0	0	0	HPRC_PLUS	male	3140		EUR	PGP - Ashkenazim Jewish	HG002	HG002 2 JAHKSD010000240.1	1478	0.502	0.518	0.404	0.617	FALSE	303	Alpha	Satellite
chr5	49416527	49416528	182045439	+	2	JAHKSD010000286.1	6280	6281	95909	0	0	0	0	1	0	0	0	0	HPRC_PLUS	male	3140		EUR	PGP - Ashkenazim Jewish	HG002	HG002 2 JAHKSD010000286.1	1479	0.502	0.518	0.404	0.617	FALSE	303	Alpha	Satellite
chr5	49416620	49416621	182045439	-	2	JAHKSD010000238.1	212478	212479	212479	0	0	0	0	1	0	0	0	0	HPRC_PLUS	male	3140		EUR	PGP - Ashkenazim Jewish	HG002	HG002 2 JAHKSD010000238.1	1480	0.502	0.518	0.404	0.617	FALSE	303	Alpha	Satellite
chr5	49417558	49417559	182045439	-	2	JAHKSD010000357.1	93736	93737	93737	0	0	0	0	1	0	0	0	0	HPRC_PLUS	male	3140		EUR	PGP - Ashkenazim Jewish	HG002	HG002 2 JAHKSD010000357.1	1481	0.502	0.518	0.404	0.617	FALSE	303	Alpha	Satellite
chr5	49421669	49421670	182045439	+	2	JAHKSD010000212.1	2	3	140635	0	0	0	0	1	0	0	0	0	HPRC_PLUS	male	3140		EUR	PGP - Ashkenazim Jewish	HG002	HG002 2 JAHKSD010000212.1	1482	0.502	0.519	0.402	0.617	FALSE	303	Alpha	Satellite
chr5	49423886	49423887	182045439	+	2	JAHKSD010000342.1	6817	6818	143406	0	0	0	0	1	0	0	0	0	HPRC_PLUS	male	3140		EUR	PGP - Ashkenazim Jewish	HG002	HG002 2 JAHKSD010000342.1	1483	0.502	0.519	0.402	0.617	FALSE	304	Alpha	Satellite
chr5	49427811	49427812	182045439	-	2	JAHKSD010000247.1	153514	153515	154049	0	0	0	0	1	0	0	0	0	HPRC_PLUS	male	3140		EUR	PGP - Ashkenazim Jewish	HG002	HG002 2 JAHKSD010000247.1	1484	0.502	0.519	0.402	0.619	FALSE	303	Alpha	Satellite
chr5	49428261	49428262	182045439	+	2	JAHKSD010000329.1	0	1	169385	0	0	0	0	1	0	0	0	0	HPRC_PLUS	male	3140		EUR	PGP - Ashkenazim Jewish	HG002	HG002 2 JAHKSD010000329.1	1485	0.502	0.519	0.402	0.619	FALSE	303	Alpha	Satellite
chr5	49429629	49429630	182045439	-	2	JAHKSD010000196.1	226982	226983	242736	0	0	0	0	1	0	0	0	0	HPRC_PLUS	male	3140		EUR	PGP - Ashkenazim Jewish	HG002	HG002 2 JAHKSD010000196.1	1486	0.502	0.519	0.402	0.619	FALSE	303	Alpha	Satellite
chr5	49432680	49432681	182045439	+	2	JAHKSD010000387.1	0	1	79179	0	0	0	0	1	0	0	0	0	HPRC_PLUS	male	3140		EUR	PGP - Ashkenazim Jewish	HG002	HG002 2 JAHKSD010000387.1	1487	0.502	0.521	0.402	0.619	FALSE	301	Alpha	Satellite
chr5	49447110	49447111	182045439	+	2	JAHKSD010000212.1	140616	140617	140635	0	0	0	0	1	0	0	0	0	HPRC_PLUS	male	3140		EUR	PGP - Ashkenazim Jewish	HG002	HG002 2 JAHKSD010000212.1	1488	0.503	0.521	0.403	0.619	FALSE	299	Alpha	Satellite
chr5	49462331	49462332	182045439	+	2	JAHKSD010000280.1	118929	118930	118933	0	0	0	0	1	0	0	0	0	HPRC_PLUS	male	3140		EUR	PGP - Ashkenazim Jewish	HG002	HG002 2 JAHKSD010000280.1	1489	0.504	0.518	0.403	0.619	FALSE	299	Alpha	Satellite
chr5	49467054	49467055	182045439	-	2	JAHKSD010000238.1	0	1	212479	0	0	0	0	1	0	0	0	0	HPRC_PLUS	male	3140		EUR	PGP - Ashkenazim Jewish	HG002	HG002 2 JAHKSD010000238.1	1490	0.504	0.518	0.403	0.616	FALSE	297	Alpha	Satellite
chr5	49469220	49469221	182045439	-	2	JAHKSD010000247.1	0	1	154049	0	0	0	0	1	0	0	0	0	HPRC_PLUS	male	3140		EUR	PGP - Ashkenazim Jewish	HG002	HG002 2 JAHKSD010000247.1	1491	0.504	0.518	0.402	0.616	FALSE	297	Alpha	Satellite
chr5	49470743	49470744	182045439	+	2	JAHKSD010000351.1	62924	62925	69495	0	0	0	0	1	0	0	0	0	HPRC_PLUS	male	3140		EUR	PGP - Ashkenazim Jewish	HG002	HG002 2 JAHKSD010000351.1	1492	0.504	0.518	0.402	0.616	FALSE	296	Alpha	Satellite
chr5	49470878	49470879	182045439	+	2	JAHKSD010000323.1	325847	325848	325848	0	0	0	0	1	0	0	0	0	HPRC_PLUS	male	3140		EUR	PGP - Ashkenazim Jewish	HG002	HG002 2 JAHKSD010000323.1	1493	0.504	0.518	0.402	0.616	FALSE	296	Alpha	Satellite
chr5	49471566	49471567	182045439	-	2	JAHKSD010000295.1	3	4	197264	0	0	0	0	1	0	0	0	0	HPRC_PLUS	male	3140		EUR	PGP - Ashkenazim Jewish	HG002	HG002 2 JAHKSD010000295.1	1494	0.504	0.518	0.402	0.616	FALSE	296	Alpha	Satellite
chr5	49471920	49471921	182045439	+	2	JAHKSD010000240.1	124553	124554	126999	0	0	0	0	1	0	0	0	0	HPRC_PLUS	male	3140		EUR	PGP - Ashkenazim Jewish	HG002	HG002 2 JAHKSD010000240.1	1495	0.504	0.518	0.402	0.616	FALSE	296	Alpha	Satellite
chr5	49474305	49474306	182045439	+	2	JAHKSD010000054.1	382479	382480	387739	0	0	0	0	1	0	0	0	0	HPRC_PLUS	male	3140		EUR	PGP - Ashkenazim Jewish	HG002	HG002 2 JAHKSD010000054.1	1496	0.504	0.518	0.402	0.615	FALSE	296	Alpha	Satellite
chr5	49474305	49474306	182045439	-	2	JAHKSD010000196.1	26367	26368	242736	0	0	0	0	1	0	0	0	0	HPRC_PLUS	male	3140		EUR	PGP - Ashkenazim Jewish	HG002	HG002 2 JAHKSD010000196.1	1497	0.504	0.518	0.402	0.615	FALSE	296	Alpha	Satellite
chr5	49474305	49474306	182045439	+	2	JAHKSD010000286.1	93265	93266	95909	0	0	0	0	1	0	0	0	0	HPRC_PLUS	male	3140		EUR	PGP - Ashkenazim Jewish	HG002	HG002 2 JAHKSD010000286.1	1498	0.504	0.518	0.402	0.615	FALSE	296	Alpha	Satellite
chr5	49474631	49474632	182045439	-	2	JAHKSD010000287.1	32948	32949	171198	0	0	0	0	1	0	0	0	0	HPRC_PLUS	male	3140		EUR	PGP - Ashkenazim Jewish	HG002	HG002 2 JAHKSD010000287.1	1499	0.504	0.518	0.402	0.615	FALSE	296	Alpha	Satellite
chr5	49474636	49474637	182045439	-	2	JAHKSD010000357.1	975	976	93737	0	0	0	0	1	0	0	0	0	HPRC_PLUS	male	3140		EUR	PGP - Ashkenazim Jewish	HG002	HG002 2 JAHKSD010000357.1	1500	0.504	0.518	0.402	0.615	FALSE	296	Alpha	Satellite
chr5	49474638	49474639	182045439	+	2	JAHKSD010000342.1	135357	135358	143406	0	0	0	0	1	0	0	0	0	HPRC_PLUS	male	3140		EUR	PGP - Ashkenazim Jewish	HG002	HG002 2 JAHKSD010000342.1	1501	0.504	0.518	0.402	0.615	FALSE	296	Alpha	Satellite
chr5	49474643	49474644	182045439	+	2	JAHKSD010000387.1	73907	73908	79179	0	0	0	0	1	0	0	0	0	HPRC_PLUS	male	3140		EUR	PGP - Ashkenazim Jewish	HG002	HG002 2 JAHKSD010000387.1	1502	0.504	0.518	0.402	0.615	FALSE	296	Alpha	Satellite
chr5	49474643	49474644	182045439	+	2	JAHKSD010000147.1	72534	72535	82093	0	0	0	0	1	0	0	0	0	HPRC_PLUS	male	3140		EUR	PGP - Ashkenazim Jewish	HG002	HG002 2 JAHKSD010000147.1	1503	0.504	0.518	0.402	0.615	FALSE	296	Alpha	Satellite
chr5	49474643	49474644	182045439	+	2	JAHKSD010000329.1	160169	160170	169385	0	0	0	0	1	0	0	0	0	HPRC_PLUS	male	3140		EUR	PGP - Ashkenazim Jewish	HG002	HG002 2 JAHKSD010000329.1	1504	0.504	0.518	0.402	0.615	FALSE	296	Alpha	Satellite
chr5	49475160	49475161	182045439	+	2	JAHKSD010000389.1	62504	62505	73328	0	0	0	0	1	0	0	0	0	HPRC_PLUS	male	3140		EUR	PGP - Ashkenazim Jewish	HG002	HG002 2 JAHKSD010000389.1	1505	0.504	0.518	0.402	0.615	FALSE	296	Alpha	Satellite
chr5	67937230	67937231	182045439	+	2	JAHKSD010000058.1	21026701	21026702	21026702	0	0	0	0	1	0	0	0	0	HPRC_PLUS	male	3140		EUR	PGP - Ashkenazim Jewish	HG002	HG002 2 JAHKSD010000058.1	1506	0.602	0.628	0.492	0.728	FALSE	2	Poisson breaks	Chromosome end or Poisson
chr5	67947593	67947594	182045439	+	2	JAHKSD010000048.1	13663	13664	2567406	0	0	0	0	1	0	0	0	0	HPRC_PLUS	male	3140		EUR	PGP - Ashkenazim Jewish	HG002	HG002 2 JAHKSD010000048.1	1507	0.602	0.599	0.454	0.728	FALSE	2	Poisson breaks	Chromosome end or Poisson
chr5	70500056	70500057	182045439	+	2	JAHKSD010000181.1	864701	864702	864702	0	0	0	0	1	0	0	0	0	HPRC_PLUS	male	3140		EUR	PGP - Ashkenazim Jewish	HG002	HG002 2 JAHKSD010000181.1	1508	0.616	0.579	0.422	0.74	FALSE	23	SD	SD and High GA/TC (80%)
chr5	70500931	70500932	182045439	+	2	JAHKSD010000048.1	2567405	2567406	2567406	0	0	0	0	1	0	0	0	0	HPRC_PLUS	male	3140		EUR	PGP - Ashkenazim Jewish	HG002	HG002 2 JAHKSD010000048.1	1509	0.593	0.579	0.422	0.74	FALSE	24	SD	SD and High GA/TC (80%)
chr5	70986555	70986556	182045439	-	2	JAHKSD010000001.1	110635363	110635364	110635364	0	0	0	0	1	0	0	0	0	HPRC_PLUS	male	3140		EUR	PGP - Ashkenazim Jewish	HG002	HG002 2 JAHKSD010000001.1	1510	0.6	0.642	0.615	0.722	FALSE	66	SD	SD and High GA/TC (80%)
chr5	71173860	71173861	182045439	-	2	JAHKSD010000181.1	0	1	864702	0	0	0	0	1	0	0	0	0	HPRC_PLUS	male	3140		EUR	PGP - Ashkenazim Jewish	HG002	HG002 2 JAHKSD010000181.1	1511	0.574	0.634	0.671	0.775	FALSE	68	SD	SD and High GA/TC (80%)
chr5	181659065	181659066	182045439	-	2	JAHKSD010000001.1	0	1	110635364	0	0	0	0	1	0	0	0	0	HPRC_PLUS	male	3140		EUR	PGP - Ashkenazim Jewish	HG002	HG002 2 JAHKSD010000001.1	1512	0.675	0.751	0.781	0.676	FALSE	183	High GC (75%)	other
chr5	181660055	181660056	182045439	+	2	JAHKSD010000271.1	0	1	393225	0	0	0	0	1	0	0	0	0	HPRC_PLUS	male	3140		EUR	PGP - Ashkenazim Jewish	HG002	HG002 2 JAHKSD010000271.1	1513	0.675	0.751	0.781	0.676	FALSE	183	High GC (75%)	other
chr5	182045434	182045435	182045439	+	2	JAHKSD010000271.1	389553	389554	393225	0	0	0	0	1	0	0	0	0	HPRC_PLUS	male	3140		EUR	PGP - Ashkenazim Jewish	HG002	HG002 2 JAHKSD010000271.1	1514	0.671	0.627	0.794	0.687	FALSE	159	Chromosome end	Chromosome end or Poisson
chr6	26551548	26551549	172126628	+	2	JAHKSD010000349.1	0	1	44544	0	0	0	0	1	0	0	0	0	HPRC_PLUS	male	3140		EUR	PGP - Ashkenazim Jewish	HG002	HG002 2 JAHKSD010000349.1	1515	0.619	0.604	0.509	0.703	FALSE	74	SD	SD and High GA/TC (80%)
chr6	26560783	26560784	172126628	-	2	JAHKSD010000415.1	34036	34037	34037	0	0	0	0	1	0	0	0	0	HPRC_PLUS	male	3140		EUR	PGP - Ashkenazim Jewish	HG002	HG002 2 JAHKSD010000415.1	1516	0.619	0.604	0.509	0.703	FALSE	79	SD	SD and High GA/TC (80%)
chr6	26571610	26571611	172126628	-	2	JAHKSD010000392.1	68843	68844	68844	0	0	0	0	1	0	0	0	0	HPRC_PLUS	male	3140		EUR	PGP - Ashkenazim Jewish	HG002	HG002 2 JAHKSD010000392.1	1517	0.619	0.611	0.497	0.688	FALSE	81	SD	SD and High GA/TC (80%)
chr6	26580380	26580381	172126628	+	2	JAHKSD010000018.1	26674280	26674281	26674281	0	0	0	0	1	0	0	0	0	HPRC_PLUS	male	3140		EUR	PGP - Ashkenazim Jewish	HG002	HG002 2 JAHKSD010000018.1	1518	0.619	0.611	0.543	0.688	FALSE	83	SD	SD and High GA/TC (80%)
chr6	26594856	26594857	172126628	-	2	JAHKSD010000415.1	0	1	34037	0	0	0	0	1	0	0	0	0	HPRC_PLUS	male	3140		EUR	PGP - Ashkenazim Jewish	HG002	HG002 2 JAHKSD010000415.1	1519	0.603	0.636	0.56	0.701	FALSE	84	SD	SD and High GA/TC (80%)
chr6	26596106	26596107	172126628	+	2	JAHKSD010000349.1	44543	44544	44544	0	0	0	0	1	0	0	0	0	HPRC_PLUS	male	3140		EUR	PGP - Ashkenazim Jewish	HG002	HG002 2 JAHKSD010000349.1	1520	0.58	0.636	0.56	0.701	FALSE	84	SD	SD and High GA/TC (80%)
chr6	26615545	26615546	172126628	-	2	JAHKSD010000392.1	24936	24937	68844	0	0	0	0	1	0	0	0	0	HPRC_PLUS	male	3140		EUR	PGP - Ashkenazim Jewish	HG002	HG002 2 JAHKSD010000392.1	1521	0.646	0.589	0.546	0.707	FALSE	84	SD	SD and High GA/TC (80%)
chr6	26655926	26655927	172126628	-	2	JAHKSD010000045.1	32356767	32356768	32356768	0	0	0	0	1	0	0	0	0	HPRC_PLUS	male	3140		EUR	PGP - Ashkenazim Jewish	HG002	HG002 2 JAHKSD010000045.1	1522	0.609	0.621	0.559	0.688	FALSE	78	SD	SD and High GA/TC (80%)
chr6	58286685	58286686	172126628	+	2	JAHKSD010000244.1	1929	1930	297514	0	0	0	0	1	0	0	0	0	HPRC_PLUS	male	3140		EUR	PGP - Ashkenazim Jewish	HG002	HG002 2 JAHKSD010000244.1	1523	0.563	0.566	0.428	0.663	FALSE	530	other	other
chr6	58286685	58286686	172126628	+	2	JAHKSD010000172.1	7042	7043	751970	0	0	0	0	1	0	0	0	0	HPRC_PLUS	male	3140		EUR	PGP - Ashkenazim Jewish	HG002	HG002 2 JAHKSD010000172.1	1524	0.563	0.566	0.428	0.663	FALSE	530	other	other
chr6	58286685	58286686	172126628	+	2	JAHKSD010000206.1	2008	2009	510649	0	0	0	0	1	0	0	0	0	HPRC_PLUS	male	3140		EUR	PGP - Ashkenazim Jewish	HG002	HG002 2 JAHKSD010000206.1	1525	0.563	0.566	0.428	0.663	FALSE	530	other	other
chr6	58287593	58287594	172126628	-	2	JAHKSD010000049.1	1675004	1675005	1675005	0	0	0	0	1	0	0	0	0	HPRC_PLUS	male	3140		EUR	PGP - Ashkenazim Jewish	HG002	HG002 2 JAHKSD010000049.1	1526	0.563	0.566	0.428	0.663	FALSE	530	Alpha	Satellite
chr6	58288524	58288525	172126628	+	2	JAHKSD010000251.1	0	1	218369	0	0	0	0	1	0	0	0	0	HPRC_PLUS	male	3140		EUR	PGP - Ashkenazim Jewish	HG002	HG002 2 JAHKSD010000251.1	1527	0.563	0.566	0.428	0.663	FALSE	530	Alpha	Satellite
chr6	58289718	58289719	172126628	-	2	JAHKSD010000234.1	571259	571260	571260	0	0	0	0	1	0	0	0	0	HPRC_PLUS	male	3140		EUR	PGP - Ashkenazim Jewish	HG002	HG002 2 JAHKSD010000234.1	1528	0.563	0.566	0.428	0.663	FALSE	531	Alpha	Satellite
chr6	58291595	58291596	172126628	-	2	JAHKSD010000062.1	623098	623099	631581	0	0	0	0	1	0	0	0	0	HPRC_PLUS	male	3140		EUR	PGP - Ashkenazim Jewish	HG002	HG002 2 JAHKSD010000062.1	1529	0.563	0.566	0.428	0.663	FALSE	533	Alpha	Satellite
chr6	58307966	58307967	172126628	-	2	JAHKSD010000200.1	313582	313583	313587	0	0	0	0	1	0	0	0	0	HPRC_PLUS	male	3140		EUR	PGP - Ashkenazim Jewish	HG002	HG002 2 JAHKSD010000200.1	1530	0.513	0.509	0.428	0.618	FALSE	663	Alpha	Satellite
chr6	58315211	58315212	172126628	-	2	JAHKSD010000303.1	138496	138497	138497	0	0	0	0	1	0	0	0	0	HPRC_PLUS	male	3140		EUR	PGP - Ashkenazim Jewish	HG002	HG002 2 JAHKSD010000303.1	1531	0.513	0.506	0.425	0.618	FALSE	721	Alpha	Satellite
chr6	58316602	58316603	172126628	+	2	JAHKSD010000016.1	0	1	111100561	0	0	0	0	1	0	0	0	0	HPRC_PLUS	male	3140		EUR	PGP - Ashkenazim Jewish	HG002	HG002 2 JAHKSD010000016.1	1532	0.513	0.506	0.425	0.618	FALSE	727	Alpha	Satellite
chr6	58316898	58316899	172126628	-	2	JAHKSD010000183.1	154844	154845	154850	0	0	0	0	1	0	0	0	0	HPRC_PLUS	male	3140		EUR	PGP - Ashkenazim Jewish	HG002	HG002 2 JAHKSD010000183.1	1533	0.513	0.506	0.425	0.618	FALSE	727	Alpha	Satellite
chr6	58322104	58322105	172126628	+	2	JAHKSD010000375.1	0	1	103674	0	0	0	0	1	0	0	0	0	HPRC_PLUS	male	3140		EUR	PGP - Ashkenazim Jewish	HG002	HG002 2 JAHKSD010000375.1	1534	0.513	0.506	0.425	0.618	FALSE	737	Alpha	Satellite
chr6	58323940	58323941	172126628	-	2	JAHKSD010000267.1	112269	112270	112271	0	0	0	0	1	0	0	0	0	HPRC_PLUS	male	3140		EUR	PGP - Ashkenazim Jewish	HG002	HG002 2 JAHKSD010000267.1	1535	0.513	0.506	0.425	0.618	FALSE	742	Alpha	Satellite
chr6	58323940	58323941	172126628	+	2	JAHKSD010000328.1	8	9	77282	0	0	0	0	1	0	0	0	0	HPRC_PLUS	male	3140		EUR	PGP - Ashkenazim Jewish	HG002	HG002 2 JAHKSD010000328.1	1536	0.513	0.506	0.425	0.618	FALSE	742	Alpha	Satellite
chr6	58324835	58324836	172126628	-	2	JAHKSD010000312.1	201353	201354	202140	0	0	0	0	1	0	0	0	0	HPRC_PLUS	male	3140		EUR	PGP - Ashkenazim Jewish	HG002	HG002 2 JAHKSD010000312.1	1537	0.513	0.506	0.425	0.618	FALSE	749	Alpha	Satellite
chr6	58330690	58330691	172126628	-	2	JAHKSD010000353.1	109733	109734	109734	0	0	0	0	1	0	0	0	0	HPRC_PLUS	male	3140		EUR	PGP - Ashkenazim Jewish	HG002	HG002 2 JAHKSD010000353.1	1538	0.514	0.507	0.426	0.618	FALSE	757	Alpha	Satellite
chr6	58332565	58332566	172126628	-	2	JAHKSD010000291.1	148937	148938	148938	0	0	0	0	1	0	0	0	0	HPRC_PLUS	male	3140		EUR	PGP - Ashkenazim Jewish	HG002	HG002 2 JAHKSD010000291.1	1539	0.514	0.507	0.426	0.618	FALSE	757	Alpha	Satellite
chr6	58332860	58332861	172126628	-	2	JAHKSD010000086.1	149802	149803	149803	0	0	0	0	1	0	0	0	0	HPRC_PLUS	male	3140		EUR	PGP - Ashkenazim Jewish	HG002	HG002 2 JAHKSD010000086.1	1540	0.514	0.507	0.426	0.618	FALSE	757	Alpha	Satellite
chr6	58332935	58332936	172126628	-	2	JAHKSD010000324.1	125367	125368	125368	0	0	0	0	1	0	0	0	0	HPRC_PLUS	male	3140		EUR	PGP - Ashkenazim Jewish	HG002	HG002 2 JAHKSD010000324.1	1541	0.514	0.507	0.426	0.618	FALSE	757	Alpha	Satellite
chr6	58335668	58335669	172126628	+	2	JAHKSD010000129.1	0	1	187321	0	0	0	0	1	0	0	0	0	HPRC_PLUS	male	3140		EUR	PGP - Ashkenazim Jewish	HG002	HG002 2 JAHKSD010000129.1	1542	0.515	0.511	0.426	0.618	FALSE	762	Alpha	Satellite
chr6	58336186	58336187	172126628	+	2	JAHKSD010000245.1	0	1	191124	0	0	0	0	1	0	0	0	0	HPRC_PLUS	male	3140		EUR	PGP - Ashkenazim Jewish	HG002	HG002 2 JAHKSD010000245.1	1543	0.515	0.511	0.426	0.618	FALSE	764	Alpha	Satellite
chr6	58338101	58338102	172126628	-	2	JAHKSD010000326.1	211307	211308	211308	0	0	0	0	1	0	0	0	0	HPRC_PLUS	male	3140		EUR	PGP - Ashkenazim Jewish	HG002	HG002 2 JAHKSD010000326.1	1544	0.515	0.511	0.427	0.618	FALSE	769	Alpha	Satellite
chr6	58345765	58345766	172126628	-	2	JAHKSD010000395.1	49827	49828	49828	0	0	0	0	1	0	0	0	0	HPRC_PLUS	male	3140		EUR	PGP - Ashkenazim Jewish	HG002	HG002 2 JAHKSD010000395.1	1545	0.515	0.511	0.427	0.618	FALSE	780	Alpha	Satellite
chr6	58346212	58346213	172126628	+	2	JAHKSD010000360.1	0	1	61140	0	0	0	0	1	0	0	0	0	HPRC_PLUS	male	3140		EUR	PGP - Ashkenazim Jewish	HG002	HG002 2 JAHKSD010000360.1	1546	0.515	0.511	0.427	0.618	FALSE	783	Alpha	Satellite
chr6	58347348	58347349	172126628	-	2	JAHKSD010000322.1	173463	173464	173464	0	0	0	0	1	0	0	0	0	HPRC_PLUS	male	3140		EUR	PGP - Ashkenazim Jewish	HG002	HG002 2 JAHKSD010000322.1	1547	0.515	0.511	0.427	0.616	FALSE	788	Alpha	Satellite
chr6	58350169	58350170	172126628	+	2	JAHKSD010000275.1	0	1	243261	0	0	0	0	1	0	0	0	0	HPRC_PLUS	male	3140		EUR	PGP - Ashkenazim Jewish	HG002	HG002 2 JAHKSD010000275.1	1548	0.515	0.511	0.427	0.616	FALSE	794	Alpha	Satellite
chr6	58351109	58351110	172126628	+	2	JAHKSD010000381.1	0	1	61379	0	0	0	0	1	0	0	0	0	HPRC_PLUS	male	3140		EUR	PGP - Ashkenazim Jewish	HG002	HG002 2 JAHKSD010000381.1	1549	0.515	0.511	0.427	0.617	FALSE	798	Alpha	Satellite
chr6	58351393	58351394	172126628	-	2	JAHKSD010000087.1	62811	62812	62812	0	0	0	0	1	0	0	0	0	HPRC_PLUS	male	3140		EUR	PGP - Ashkenazim Jewish	HG002	HG002 2 JAHKSD010000087.1	1550	0.515	0.511	0.427	0.617	FALSE	798	Alpha	Satellite
chr6	58352724	58352725	172126628	+	2	JAHKSD010000394.1	0	1	58182	0	0	0	0	1	0	0	0	0	HPRC_PLUS	male	3140		EUR	PGP - Ashkenazim Jewish	HG002	HG002 2 JAHKSD010000394.1	1551	0.515	0.511	0.427	0.617	FALSE	800	Alpha	Satellite
chr6	58355280	58355281	172126628	+	2	JAHKSD010000338.1	0	1	57614	0	0	0	0	1	0	0	0	0	HPRC_PLUS	male	3140		EUR	PGP - Ashkenazim Jewish	HG002	HG002 2 JAHKSD010000338.1	1552	0.515	0.511	0.427	0.617	FALSE	803	Alpha	Satellite
chr6	58356085	58356086	172126628	+	2	JAHKSD010000243.1	0	1	54998	0	0	0	0	1	0	0	0	0	HPRC_PLUS	male	3140		EUR	PGP - Ashkenazim Jewish	HG002	HG002 2 JAHKSD010000243.1	1553	0.515	0.51	0.427	0.617	FALSE	805	Alpha	Satellite
chr6	58357383	58357384	172126628	+	2	JAHKSD010000366.1	0	1	46568	0	0	0	0	1	0	0	0	0	HPRC_PLUS	male	3140		EUR	PGP - Ashkenazim Jewish	HG002	HG002 2 JAHKSD010000366.1	1554	0.513	0.508	0.427	0.617	FALSE	809	Alpha	Satellite
chr6	58358232	58358233	172126628	-	2	JAHKSD010000227.1	48961	48962	48962	0	0	0	0	1	0	0	0	0	HPRC_PLUS	male	3140		EUR	PGP - Ashkenazim Jewish	HG002	HG002 2 JAHKSD010000227.1	1555	0.513	0.508	0.427	0.617	FALSE	809	Alpha	Satellite
chr6	58362689	58362690	172126628	+	2	JAHKSD010000206.1	510648	510649	510649	0	0	0	0	1	0	0	0	0	HPRC_PLUS	male	3140		EUR	PGP - Ashkenazim Jewish	HG002	HG002 2 JAHKSD010000206.1	1556	0.512	0.508	0.427	0.617	FALSE	810	Alpha	Satellite
chr6	58393987	58393988	172126628	-	2	JAHKSD010000049.1	0	1	1675005	100	100	100	1	0	0	0	0	0	HPRC_PLUS	male	3140		EUR	PGP - Ashkenazim Jewish	HG002	HG002 2 JAHKSD010000049.1	1557	0.508	0.51	0.422	0.62	FALSE	768	Alpha	Satellite
chr6	58397978	58397979	172126628	-	2	JAHKSD010000395.1	0	1	49828	0	0	0	0	1	0	0	0	0	HPRC_PLUS	male	3140		EUR	PGP - Ashkenazim Jewish	HG002	HG002 2 JAHKSD010000395.1	1558	0.508	0.508	0.423	0.62	FALSE	767	Alpha	Satellite
chr6	58401225	58401226	172126628	+	2	JAHKSD010000328.1	77281	77282	77282	0	0	0	0	1	0	0	0	0	HPRC_PLUS	male	3140		EUR	PGP - Ashkenazim Jewish	HG002	HG002 2 JAHKSD010000328.1	1559	0.508	0.508	0.423	0.62	FALSE	767	Alpha	Satellite
chr6	58403963	58403964	172126628	+	2	JAHKSD010000366.1	46567	46568	46568	0	0	0	0	1	0	0	0	0	HPRC_PLUS	male	3140		EUR	PGP - Ashkenazim Jewish	HG002	HG002 2 JAHKSD010000366.1	1560	0.509	0.508	0.423	0.62	FALSE	756	Alpha	Satellite
chr6	58407191	58407192	172126628	-	2	JAHKSD010000227.1	0	1	48962	0	0	0	0	1	0	0	0	0	HPRC_PLUS	male	3140		EUR	PGP - Ashkenazim Jewish	HG002	HG002 2 JAHKSD010000227.1	1561	0.51	0.508	0.423	0.62	FALSE	748	Alpha	Satellite
chr6	58407351	58407352	172126628	+	2	JAHKSD010000360.1	61139	61140	61140	0	0	0	0	1	0	0	0	0	HPRC_PLUS	male	3140		EUR	PGP - Ashkenazim Jewish	HG002	HG002 2 JAHKSD010000360.1	1562	0.51	0.508	0.424	0.62	FALSE	748	Alpha	Satellite
chr6	58409600	58409601	172126628	-	2	JAHKSD010000045.1	0	1	32356768	100	100	100	1	0	0	0	0	0	HPRC_PLUS	male	3140		EUR	PGP - Ashkenazim Jewish	HG002	HG002 2 JAHKSD010000045.1	1563	0.51	0.508	0.424	0.62	FALSE	741	Alpha	Satellite
chr6	58410911	58410912	172126628	+	2	JAHKSD010000394.1	58181	58182	58182	0	0	0	0	1	0	0	0	0	HPRC_PLUS	male	3140		EUR	PGP - Ashkenazim Jewish	HG002	HG002 2 JAHKSD010000394.1	1564	0.51	0.508	0.424	0.62	FALSE	738	Alpha	Satellite
chr6	58411079	58411080	172126628	+	2	JAHKSD010000243.1	54997	54998	54998	0	0	0	0	1	0	0	0	0	HPRC_PLUS	male	3140		EUR	PGP - Ashkenazim Jewish	HG002	HG002 2 JAHKSD010000243.1	1565	0.51	0.508	0.424	0.62	FALSE	738	Alpha	Satellite
chr6	58412484	58412485	172126628	+	2	JAHKSD010000381.1	61378	61379	61379	0	0	0	0	1	0	0	0	0	HPRC_PLUS	male	3140		EUR	PGP - Ashkenazim Jewish	HG002	HG002 2 JAHKSD010000381.1	1566	0.51	0.508	0.424	0.62	FALSE	725	Alpha	Satellite
chr6	58412904	58412905	172126628	+	2	JAHKSD010000338.1	57613	57614	57614	0	0	0	0	1	0	0	0	0	HPRC_PLUS	male	3140		EUR	PGP - Ashkenazim Jewish	HG002	HG002 2 JAHKSD010000338.1	1567	0.51	0.508	0.424	0.62	FALSE	722	Alpha	Satellite
chr6	58414204	58414205	172126628	-	2	JAHKSD010000087.1	0	1	62812	0	0	0	0	1	0	0	0	0	HPRC_PLUS	male	3140		EUR	PGP - Ashkenazim Jewish	HG002	HG002 2 JAHKSD010000087.1	1568	0.51	0.509	0.424	0.62	FALSE	718	Alpha	Satellite
chr6	58425802	58425803	172126628	+	2	JAHKSD010000375.1	103673	103674	103674	0	0	0	0	1	0	0	0	0	HPRC_PLUS	male	3140		EUR	PGP - Ashkenazim Jewish	HG002	HG002 2 JAHKSD010000375.1	1569	0.511	0.512	0.424	0.62	FALSE	632	Alpha	Satellite
chr6	58436884	58436885	172126628	-	2	JAHKSD010000267.1	0	1	112271	0	0	0	0	1	0	0	0	0	HPRC_PLUS	male	3140		EUR	PGP - Ashkenazim Jewish	HG002	HG002 2 JAHKSD010000267.1	1570	0.511	0.512	0.421	0.622	FALSE	549	Alpha	Satellite
chr6	58439936	58439937	172126628	-	2	JAHKSD010000353.1	0	1	109734	0	0	0	0	1	0	0	0	0	HPRC_PLUS	male	3140		EUR	PGP - Ashkenazim Jewish	HG002	HG002 2 JAHKSD010000353.1	1571	0.511	0.509	0.421	0.622	FALSE	524	Alpha	Satellite
chr6	58453208	58453209	172126628	-	2	JAHKSD010000303.1	0	1	138497	0	0	0	0	1	0	0	0	0	HPRC_PLUS	male	3140		EUR	PGP - Ashkenazim Jewish	HG002	HG002 2 JAHKSD010000303.1	1572	0.51	0.511	0.421	0.623	FALSE	429	Alpha	Satellite
chr6	58456290	58456291	172126628	-	2	JAHKSD010000324.1	0	1	125368	0	0	0	0	1	0	0	0	0	HPRC_PLUS	male	3140		EUR	PGP - Ashkenazim Jewish	HG002	HG002 2 JAHKSD010000324.1	1573	0.51	0.511	0.421	0.623	FALSE	401	Alpha	Satellite
chr6	58470739	58470740	172126628	-	2	JAHKSD010000183.1	0	1	154850	0	0	0	0	1	0	0	0	0	HPRC_PLUS	male	3140		EUR	PGP - Ashkenazim Jewish	HG002	HG002 2 JAHKSD010000183.1	1574	0.51	0.508	0.421	0.624	FALSE	369	Alpha	Satellite
chr6	58478472	58478473	172126628	+	2	JAHKSD010000251.1	194326	194327	218369	0	0	0	0	1	0	0	0	0	HPRC_PLUS	male	3140		EUR	PGP - Ashkenazim Jewish	HG002	HG002 2 JAHKSD010000251.1	1575	0.511	0.511	0.421	0.624	FALSE	372	Alpha	Satellite
chr6	58480384	58480385	172126628	-	2	JAHKSD010000086.1	785	786	149803	0	0	0	0	1	0	0	0	0	HPRC_PLUS	male	3140		EUR	PGP - Ashkenazim Jewish	HG002	HG002 2 JAHKSD010000086.1	1576	0.511	0.511	0.421	0.624	FALSE	370	Alpha	Satellite
chr6	58482258	58482259	172126628	-	2	JAHKSD010000291.1	0	1	148938	0	0	0	0	1	0	0	0	0	HPRC_PLUS	male	3140		EUR	PGP - Ashkenazim Jewish	HG002	HG002 2 JAHKSD010000291.1	1577	0.511	0.511	0.421	0.62	FALSE	371	Alpha	Satellite
chr6	58519988	58519989	172126628	-	2	JAHKSD010000322.1	0	1	173464	0	0	0	0	1	0	0	0	0	HPRC_PLUS	male	3140		EUR	PGP - Ashkenazim Jewish	HG002	HG002 2 JAHKSD010000322.1	1578	0.51	0.509	0.422	0.624	FALSE	193	Alpha	Satellite
chr6	58523183	58523184	172126628	+	2	JAHKSD010000129.1	187320	187321	187321	0	0	0	0	1	0	0	0	0	HPRC_PLUS	male	3140		EUR	PGP - Ashkenazim Jewish	HG002	HG002 2 JAHKSD010000129.1	1579	0.51	0.509	0.422	0.624	FALSE	189	Alpha	Satellite
chr6	58526674	58526675	172126628	+	2	JAHKSD010000245.1	191123	191124	191124	0	0	0	0	1	0	0	0	0	HPRC_PLUS	male	3140		EUR	PGP - Ashkenazim Jewish	HG002	HG002 2 JAHKSD010000245.1	1580	0.51	0.509	0.421	0.621	FALSE	176	Alpha	Satellite
chr6	58527232	58527233	172126628	-	2	JAHKSD010000312.1	0	1	202140	0	0	0	0	1	0	0	0	0	HPRC_PLUS	male	3140		EUR	PGP - Ashkenazim Jewish	HG002	HG002 2 JAHKSD010000312.1	1581	0.51	0.511	0.421	0.621	FALSE	176	Alpha	Satellite
chr6	58553548	58553549	172126628	-	2	JAHKSD010000326.1	2571	2572	211308	0	0	0	0	1	0	0	0	0	HPRC_PLUS	male	3140		EUR	PGP - Ashkenazim Jewish	HG002	HG002 2 JAHKSD010000326.1	1582	0.51	0.508	0.423	0.624	FALSE	144	Alpha	Satellite
chr6	58553847	58553848	172126628	+	2	JAHKSD010000244.1	297513	297514	297514	0	0	0	0	1	0	0	0	0	HPRC_PLUS	male	3140		EUR	PGP - Ashkenazim Jewish	HG002	HG002 2 JAHKSD010000244.1	1583	0.51	0.508	0.423	0.624	FALSE	144	Alpha	Satellite
chr6	58566081	58566082	172126628	+	2	JAHKSD010000172.1	751969	751970	751970	0	0	0	0	1	0	0	0	0	HPRC_PLUS	male	3140		EUR	PGP - Ashkenazim Jewish	HG002	HG002 2 JAHKSD010000172.1	1584	0.509	0.508	0.423	0.622	FALSE	138	Alpha	Satellite
chr6	58591116	58591117	172126628	+	2	JAHKSD010000275.1	243260	243261	243261	0	0	0	0	1	0	0	0	0	HPRC_PLUS	male	3140		EUR	PGP - Ashkenazim Jewish	HG002	HG002 2 JAHKSD010000275.1	1585	0.51	0.51	0.424	0.62	FALSE	121	Alpha	Satellite
chr6	58605724	58605725	172126628	-	2	JAHKSD010000234.1	0	1	571260	0	0	0	0	1	0	0	0	0	HPRC_PLUS	male	3140		EUR	PGP - Ashkenazim Jewish	HG002	HG002 2 JAHKSD010000234.1	1586	0.51	0.508	0.424	0.619	FALSE	116	Alpha	Satellite
chr6	58619218	58619219	172126628	-	2	JAHKSD010000200.1	0	1	313587	0	0	0	0	1	0	0	0	0	HPRC_PLUS	male	3140		EUR	PGP - Ashkenazim Jewish	HG002	HG002 2 JAHKSD010000200.1	1587	0.509	0.509	0.423	0.619	FALSE	118	Alpha	Satellite
chr6	58878424	58878425	172126628	-	2	JAHKSD010000062.1	4	5	631581	0	0	0	0	1	0	0	0	0	HPRC_PLUS	male	3140		EUR	PGP - Ashkenazim Jewish	HG002	HG002 2 JAHKSD010000062.1	1588	0.51	0.512	0.424	0.62	FALSE	36	Alpha	Satellite
chr6	172119957	172119958	172126628	+	2	JAHKSD010000016.1	111078846	111078847	111100561	0	0	0	0	1	0	0	0	0	HPRC_PLUS	male	3140		EUR	PGP - Ashkenazim Jewish	HG002	HG002 2 JAHKSD010000016.1	1589	0.692	0.655	0.861	0.694	FALSE	140	Chromosome end	Chromosome end or Poisson
[truncated: 66,926 more rows]

## Sheet: Supplemental_Table_S4
Supplemental Table S4: Protein-coding genes overlapping frequent assembly gaps in HPRC assemblies.
[truncated: 232 more rows]

[truncated: 6 more sheets: Supplemental_Table_S5, Supplemental_Table_S6, Supplemental_Table_S7, Supplemental_Table_S8, Supplemental_Table_S9, Supplemental_Table_S10]
